# Supplementary material for: CD8+ T–cell Immune Surveillance against a Tumor Antigen Encoded by the Oncogenic Long Noncoding RNA PVT1
Source: Oxford University Press journal article supplement (doi:10.1158/2326-6066.cir-20-0964), 2021-08-25
Supplement: 23266066cir200964-sup-255948_3_supp_7254287_qw7t1y.xlsx [file 23266066cir200964-sup-255948_3_supp_7254287_qw7t1y.xlsx]

## Sheet: Table S7
	Table S7. Peptides detected in CRC123 cancer tissue
	RAW file : ST600_CRC123_A24.raw
	PF (peak found), peptides without PSMs but with matched-precursor ion peaks found by Proteome Discoverer LFQ.; %rank, score of NetMHCpan-4.1 (HLA-A*24:02); Gene type, biotype registered in GENCODE v31; Shared scan (Y for yes and N for no),the MS scans can be assigned in the search against the Swiss-Prot database
	FDR	XCorr	Sequence	Peptide length	Modification	%rank	Type	Gene	Ensembl gene ID	Gene type	Shared scan
	0.01	1.96	KYGPVFSF	8		0.024	Canonical	CYP51A1	ENSG00000001630.17	protein_coding	Y
	0.01	1.96	KYGPVFSF	8		0.024	Canonical	AC000120.2	ENSG00000285772.1	protein_coding	Y
	PF		YLDKFIRL	8		0.9631	Canonical	GNL3L	ENSG00000130119.16	protein_coding
	PF		YLDKFIRL	8		0.9631	Canonical	GNL3LP1	ENSG00000215032.2	processed_pseudogene
	PF		YLDKFIRL	8		0.9631	Canonical	ERCC8	ENSG00000049167.14	protein_coding
	0.01	1.69	LYGRSYTW	8		0.3981	Canonical	APOBEC3B	ENSG00000179750.16	protein_coding	Y
	0.01	1.69	LYGRSYTW	8		0.3981	Canonical	AL022318.4	ENSG00000284554.2	protein_coding	Y
	0.01	1.69	LYGRSYTW	8		0.3981	Canonical	APOBEC3D	ENSG00000243811.10	protein_coding	Y
	0.05	1.97	KYGLFQHI	8		0.3929	Canonical	DHCR24	ENSG00000116133.13	protein_coding	Y
	0.05	1.7	KYGIVQEF	8		0.0583	Canonical	SOGA1	ENSG00000149639.15	protein_coding	Y
	0.01	2.39	KYIHSANVL	9		0.0979	Canonical	MAPK6	ENSG00000069956.12	protein_coding	Y
	0.01	2.39	KYIHSANVL	9		0.0979	Canonical	MAPK4	ENSG00000141639.12	protein_coding	Y
	0.01	3.28	KYFLWEEKF	9		0.0118	Canonical	GRAP	ENSG00000154016.13	protein_coding	Y
	0.01	2.39	KYIHSANVL	9		0.0979	Canonical	MAPK3	ENSG00000102882.12	protein_coding	Y
	0.01	2.39	KYIHSANVL	9		0.0979	Canonical	MAPK1	ENSG00000100030.14	protein_coding	Y
	0.01	2.81	KWFFQKLRF	9		0.0882	Canonical	RPL27	ENSG00000131469.14	protein_coding	Y
	0.01	2.39	KYIHSANVL	9		0.0979	Canonical	MAPK6P3	ENSG00000237263.1	processed_pseudogene	Y
	0.01	2.39	KYIHSANVL	9		0.0979	Canonical	MAPK6P1	ENSG00000206144.5	processed_pseudogene	Y
	0.01	2.66	KYQKGFSLW	9		0.0112	Canonical	TRAM1	ENSG00000067167.8	protein_coding	Y
	0.01	2.97	KYTKIFNDF	9		0.008	Canonical	ZMYND11	ENSG00000015171.19	protein_coding	Y
	0.01	3.06	RYFKTPRKF	9		0.0086	Canonical	CIZ1	ENSG00000148337.21	protein_coding	Y
	0.01	2.6	EYLKLLHSF	9		0.0061	Canonical	SREBF2	ENSG00000198911.12	protein_coding	Y
	0.01	2.41	LYQDGVFKF	9		0.0031	Canonical	AKTIP	ENSG00000166971.17	protein_coding	Y
	0.01	2.41	LYQDGVFKF	9		0.0031	Canonical	AC010342.1	ENSG00000226432.3	processed_pseudogene	Y
	0.01	2.63	KYTPPPHHI	9		0.007	Canonical	NDUFS5	ENSG00000168653.11	protein_coding	Y
	0.01	2.63	KYTPPPHHI	9		0.007	Canonical	AC024619.4	ENSG00000263781.3	processed_pseudogene	Y
	0.01	2.6	RYMNHMQSL	9		0.017	Canonical	ARIH1	ENSG00000166233.15	protein_coding	Y
	0.01	2.74	KYQDILNEI	9		0.0169	Canonical	IQGAP2	ENSG00000145703.16	protein_coding	Y
	0.01	2.36	KYIDFDHVF	9		0.0034	Canonical	CRAMP1	ENSG00000007545.15	protein_coding	Y
	0.01	2.36	KYIDFDHVF	9		0.0034	Canonical	AL031708.1	ENSG00000261732.1	protein_coding	Y
	0.01	2.52	KYVSGEFRF	9		0.0087	Canonical	RIOK1	ENSG00000124784.9	protein_coding	Y
	PF		RYDTITNQW	9		0.018	Canonical	KLHL29	ENSG00000119771.15	protein_coding
	0.01	1.82	YYMIGEQKF	9		0.0057	Canonical	NNMT	ENSG00000166741.7	protein_coding	Y
	0.01	2.99	RYKQDVERF	9		0.0164	Canonical	SMC5	ENSG00000198887.9	protein_coding	Y
	0.01	2.12	RYQQWMERF	9		0.0078	Canonical	ELAC2	ENSG00000006744.19	protein_coding	Y
	0.01	2.6	KYMDINFDF	9		0.0078	Canonical	MYO1G	ENSG00000136286.16	protein_coding	Y
	0.01	2.6	KYMDINFDF	9		0.0078	Canonical	MYO1D	ENSG00000176658.17	protein_coding	Y
	0.01	2.75	IYQDVTLKW	9		0.0048	Canonical	BBS9	ENSG00000122507.20	protein_coding	Y
	0.01	2.48	TYAEKLHRL	9		0.0079	Canonical	DST	ENSG00000151914.20	protein_coding	Y
	0.01	2.53	NYSNIRFQF	9		0.0124	Canonical	MTMR6	ENSG00000139505.11	protein_coding	Y
	0.01	2.38	FYQRFPLSF	9		0.0047	Canonical	EDEM1	ENSG00000134109.11	protein_coding	Y
	0.01	2.81	RYQDAIRVF	9		0.0073	Canonical	EIF3L	ENSG00000100129.18	protein_coding	Y
	0.01	2.81	RYQDAIRVF	9		0.0073	Canonical	EIF3LP2	ENSG00000233837.1	processed_pseudogene	Y
	0.01	1.89	NYLRAFHAL	9		0.0412	Canonical	BAIAP2L2	ENSG00000128298.17	protein_coding	Y
	0.01	2.55	AYVHMVTHF	9	1xOxidation [M5]	0.0061	Canonical	TMBIM6	ENSG00000139644.13	protein_coding	Y
	0.01	2.54	TYLDKIKKF	9		0.0044	Canonical	SYNE2	ENSG00000054654.16	protein_coding	Y
	0.01	2.45	KYEELFPAF	9		0.0154	Canonical	NAPA	ENSG00000105402.8	protein_coding	Y
	0.01	3.06	VYERELQTF	9		0.0079	Canonical	EEF1AKMT2	ENSG00000203791.15	protein_coding	Y
	0.01	3.49	RYGIHPAKF	9		0.0126	Canonical	VWA8	ENSG00000102763.18	protein_coding	Y
	0.01	3.02	KYQHLKAEF	9		0.0248	Canonical	EEA1	ENSG00000102189.16	protein_coding	Y
	0.01	2.66	VYAILTHGI	9		0.0545	Canonical	PRPS1	ENSG00000147224.11	protein_coding	Y
	0.01	2.66	VYAILTHGI	9		0.0545	Canonical	PRPS2	ENSG00000101911.12	protein_coding	Y
	0.01	2.66	VYAILTHGI	9		0.0545	Canonical	PRPS1L1	ENSG00000229937.7	protein_coding	Y
	0.01	1.72	HYILHNSFF	9		0.04	Canonical	TIPARP	ENSG00000163659.13	protein_coding	Y
	0.01	3.02	KYAELKDRL	9		0.1226	Canonical	LAMB3	ENSG00000196878.15	protein_coding	Y
	0.01	2	KYGQGFYLI	9		0.0148	Canonical	LLGL2	ENSG00000073350.13	protein_coding	Y
	0.01	2.19	KYGIQMPAF	9		0.0453	Canonical	IQGAP1	ENSG00000140575.13	protein_coding	Y
	0.01	2.63	VYAQVARLF	9		0.0039	Canonical	SIN3A	ENSG00000169375.15	protein_coding	Y
	0.01	2.58	YWMHVQNTF	9		0.0149	Canonical	KLHL24	ENSG00000114796.16	protein_coding	Y
	0.01	3.4	KYSLVKNKI	9		0.101	Canonical	S100A16	ENSG00000188643.11	protein_coding	Y
	0.01	2.3	IYQRHVYNL	9		0.0062	Canonical	TMEM209	ENSG00000146842.17	protein_coding	Y
	0.01	2.81	IYLDTHFRL	9		0.0062	Canonical	ZNFX1	ENSG00000124201.15	protein_coding	Y
	PF		VYNNNSSRF	9		0.0149	Canonical	MYO10	ENSG00000145555.15	protein_coding
	0.01	2.91	KYISKPENL	9		0.0132	Canonical	CAB39	ENSG00000135932.11	protein_coding	Y
	0.01	2.91	KYISKPENL	9		0.0132	Canonical	CAB39L	ENSG00000102547.19	protein_coding	Y
	0.01	1.77	NYTDIKDYL	9		0.2366	Canonical	NUDT12	ENSG00000112874.10	protein_coding	Y
	0.01	2.45	TYPEVKNKL	9		0.0484	Canonical	IQGAP2	ENSG00000145703.16	protein_coding	Y
	0.01	2.01	KYIQRQETI	9		0.017	Canonical	MX1	ENSG00000157601.14	protein_coding	Y
	0.01	2	VYGFVREAL	9		0.2712	Canonical	UBXN6	ENSG00000167671.12	protein_coding	Y
	0.01	2.73	RWMSQHNRF	9		0.0464	Canonical	PAFAH1B2	ENSG00000168092.14	protein_coding	Y
	0.01	2.73	RWMSQHNRF	9		0.0464	Canonical	AL929325.1	ENSG00000271693.1	processed_pseudogene	Y
	PF		QYMKIISSF	9		0.0035	Canonical	HSPA4	ENSG00000170606.15	protein_coding
	0.01	2.66	KYMDVQFDF	9		0.0063	Canonical	MYO1C	ENSG00000197879.17	protein_coding	Y
	0.01	1.67	FYTVIPHNF	9		0.0033	Canonical	PARP3	ENSG00000041880.14	protein_coding	Y
	PF		RWMSLHHRF	9		0.0114	Canonical	PAFAH1B3	ENSG00000079462.7	protein_coding
	0.01	3.15	KYINTDAKF	9		0.014	Canonical	TRPC4AP	ENSG00000100991.12	protein_coding	Y
	PF		KWLTKSFHF	9		0.0191	Canonical	SLC35C2	ENSG00000080189.15	protein_coding
	0.01	2.39	EYSKQMQRF	9		0.0309	Canonical	HDAC2	ENSG00000196591.12	protein_coding	Y
	0.01	2.39	EYSKQMQRF	9		0.0309	Canonical	HDAC1	ENSG00000116478.12	protein_coding	Y
	0.01	2.96	KYVHLFPKL	9		0.0162	Canonical	SNRNP200	ENSG00000144028.15	protein_coding	Y
	0.01	2.42	RYLNEFEEL	9		0.0194	Canonical	EIF2AK1	ENSG00000086232.13	protein_coding	Y
	PF		RYFHWKMNL	9		0.0727	Canonical	GPR89B	ENSG00000188092.14	protein_coding
	PF		RYFHWKMNL	9		0.0727	Canonical	GPR89A	ENSG00000117262.19	protein_coding
	0.01	2.42	RYLNEFEEL	9		0.0194	Canonical	AC109992.1	ENSG00000242479.1	processed_pseudogene	Y
	0.01	2.39	IYKSIMEQF	9		0.0034	Canonical	BAIAP2L2	ENSG00000128298.17	protein_coding	Y
	0.01	1.91	TYIKSPPFF	9		0.002	Canonical	ACO1	ENSG00000122729.19	protein_coding	Y
	0.01	2.18	IYQKYIARF	9		0.0019	Canonical	CASZ1	ENSG00000130940.15	protein_coding	Y
	0.01	2.36	IYLEKLKTI	9		0.0152	Canonical	PLEC	ENSG00000178209.15	protein_coding	Y
	0.01	2.03	KYPVLVERI	9		0.0193	Canonical	ARHGEF28	ENSG00000214944.9	protein_coding	Y
	0.01	2.03	KYPVLVERI	9		0.0193	Canonical	ARHGEF18	ENSG00000104880.18	protein_coding	Y
	0.01	2.03	KYPVLVERI	9		0.0193	Canonical	AC008878.3	ENSG00000268861.7	protein_coding	Y
	0.01	2.7	SYTRLFSNF	9		0.0063	Canonical	UBP1	ENSG00000153560.12	protein_coding	Y
	0.01	2.75	VFKEKHHSW	9		0.1338	Canonical	RNASEH2B	ENSG00000136104.20	protein_coding	Y
	0.01	2.33	TYVRWYTQL	9		0.0276	Canonical	CLCC1	ENSG00000121940.15	protein_coding	Y
	0.01	2.08	VFRLQFDEF	9		0.2549	Canonical	BTRC	ENSG00000166167.18	protein_coding	Y
	0.01	2.08	VFRLQFDEF	9		0.2549	Canonical	FBXW11	ENSG00000072803.17	protein_coding	Y
	0.01	3.29	VYQNHVQHL	9		0.0042	Canonical	ARHGAP5	ENSG00000100852.13	protein_coding	Y
	0.01	1.82	FYMDTSHLF	9		0.0018	Canonical	PRRC2C	ENSG00000117523.16	protein_coding	Y
	0.01	2.74	IYIAGHPAF	9		0.0069	Canonical	HNRNPL	ENSG00000104824.17	protein_coding	Y
	0.01	2.74	IYIAGHPAF	9		0.0069	Canonical	HNRNPLP2	ENSG00000259917.1	unprocessed_pseudogene	Y
	0.01	2.33	YYLNDLERI	9		0.0657	Canonical	GNAI2	ENSG00000114353.17	protein_coding	Y
	0.01	2.4	EYATKISRF	9		0.0304	Canonical	PITHD1	ENSG00000057757.10	protein_coding	Y
	0.01	2.33	YYLNDLERI	9		0.0657	Canonical	GNAZ	ENSG00000128266.9	protein_coding	Y
	0.01	2.32	IYLLIHNNF	9		0.0087	Canonical	CD53	ENSG00000143119.14	protein_coding	Y
	0.01	2.44	RYVEIVSQF	9		0.0016	Canonical	VPS41	ENSG00000006715.16	protein_coding	Y
	0.01	2.56	VYVVGTAHF	9		0.0057	Canonical	TRABD	ENSG00000170638.9	protein_coding	Y
	0.01	2.23	AYALLLQHL	9		0.0294	Canonical	SLC26A6	ENSG00000225697.13	protein_coding	Y
	0.01	2.57	TYLKAVKLF	9		0.0037	Canonical	IREB2	ENSG00000136381.13	protein_coding	Y
	0.01	2.66	VYSHVIQKL	9		0.0035	Canonical	SDS	ENSG00000135094.11	protein_coding	Y
	0.01	2.31	VYQLRFQFL	9		0.0184	Canonical	POLR1A	ENSG00000068654.16	protein_coding	Y
	0.01	1.65	KYIESPVLF	9		0.001	Canonical	TTLL12	ENSG00000100304.13	protein_coding	Y
	0.05	1.75	RYIEELQKF	9		0.0009	Canonical	RALGPS1	ENSG00000136828.19	protein_coding	Y
	PF		RYFNSSAFF	9		0.0125	Canonical	CFTR	ENSG00000001626.15	protein_coding
	0.01	2.01	VYLPLTSHI	9		0.0056	Canonical	SNX8	ENSG00000106266.11	protein_coding	Y
	0.01	2.43	SYIQRLVQI	9		0.0154	Canonical	SAMHD1	ENSG00000101347.9	protein_coding	Y
	0.01	2.42	NYIMKIHNF	9		0.004	Canonical	ADNP	ENSG00000101126.17	protein_coding	Y
	0.01	3.65	RYLEKSIKM	9		0.0483	Canonical	NLN	ENSG00000123213.23	protein_coding	Y
	0.01	2.63	SYLKDTKLW	9		0.0522	Canonical	STK24	ENSG00000102572.14	protein_coding	Y
	0.01	3.22	EYLENALKL	9		0.0858	Canonical	GBP4	ENSG00000162654.9	protein_coding	Y
	0.01	3.22	EYLENALKL	9		0.0858	Canonical	GBP7	ENSG00000213512.3	protein_coding	Y
	0.01	3.22	EYLENALKL	9		0.0858	Canonical	GBP6	ENSG00000183347.14	protein_coding	Y
	0.01	2.38	NYGRVFSEW	9		0.0338	Canonical	SNX4	ENSG00000114520.11	protein_coding	Y
	0.01	2.79	VYTSGVYHI	9		0.0071	Canonical	TNS2	ENSG00000111077.17	protein_coding	Y
	0.01	2.31	YYEHVKARF	9		0.0313	Canonical	MLPH	ENSG00000115648.14	protein_coding	Y
	0.01	1.75	RYLPQCSYF	9		0.0072	Canonical	CCND2	ENSG00000118971.8	protein_coding	Y
	0.01	2.42	FYHKYFNYL	9		0.0489	Canonical	EXT2	ENSG00000151348.14	protein_coding	Y
	0.01	1.75	RYLPQCSYF	9		0.0072	Canonical	AC008012.1	ENSG00000285901.1	protein_coding	Y
	0.01	1.66	RWFDKTLQF	9		0.0077	Canonical	CRAT	ENSG00000095321.17	protein_coding	Y
	0.01	1.37	IYVPVSLGF	9		0.006	Canonical	OVOL1	ENSG00000172818.10	protein_coding	Y
	0.01	2.14	EYALLYHTL	9		0.0244	Canonical	AOC1	ENSG00000002726.20	protein_coding	Y
	0.01	1.35	YYIDKLEYL	9		0.0096	Canonical	NET1	ENSG00000173848.19	protein_coding	Y
	0.01	2.18	VYEYVVERF	9		0.0123	Canonical	TUT4	ENSG00000134744.14	protein_coding	Y
	0.01	2.54	KYQPRIAVF	9		0.0036	Canonical	TDG	ENSG00000139372.15	protein_coding	Y
	0.01	2.17	VQPSLFYHL	9		0.2226	Canonical	MAP3K6	ENSG00000142733.17	protein_coding	Y
	0.01	2.22	LYQHEINLF	9		0.0083	Canonical	CEBPZ	ENSG00000115816.15	protein_coding	Y
	PF		TYESIFSHF	9		0.0055	Canonical	IL10RA	ENSG00000110324.10	protein_coding
	0.01	2.28	TYARNLPAF	9		0.0069	Canonical	TTI2	ENSG00000129696.12	protein_coding	Y
	0.01	2.34	KYQIINEEF	9		0.0063	Canonical	HPS3	ENSG00000163755.8	protein_coding	Y
	0.01	2.25	PYNPLWAQL	9		0.0434	Canonical	FNIP1	ENSG00000217128.12	protein_coding	Y
	0.01	2.25	PYNPLWAQL	9		0.0434	Canonical	FNIP2	ENSG00000052795.13	protein_coding	Y
	0.01	2.34	TYVENLRLL	9		0.0296	Canonical	SYNE2	ENSG00000054654.16	protein_coding	Y
	0.01	3.03	RYLHSHHFL	9		0.0218	Canonical	VIRMA	ENSG00000164944.12	protein_coding	Y
	0.01	2.42	NYIDKVRFL	9		0.0404	Canonical	VIM	ENSG00000026025.16	protein_coding	Y
	0.01	2.13	VYLHDFQRF	9		0.0016	Canonical	PLCG2	ENSG00000197943.10	protein_coding	Y
	0.01	2.68	IYQFIMDRF	9		0.0153	Canonical	FOXC1	ENSG00000054598.9	protein_coding	Y
	0.01	2.68	IYQFIMDRF	9		0.0153	Canonical	FOXC2	ENSG00000176692.8	protein_coding	Y
	0.01	2.68	IYQFIMDRF	9		0.0153	Canonical	FOXL1	ENSG00000176678.5	protein_coding	Y
	0.01	2.99	VYQHLFTRI	9		0.0156	Canonical	AP5Z1	ENSG00000242802.9	protein_coding	Y
	0.01	2.14	RYQFIEEAF	9		0.03	Canonical	TRIM33	ENSG00000197323.12	protein_coding
	0.01	2.14	RYQFIEEAF	9		0.03	Canonical	TRIM24	ENSG00000122779.18	protein_coding
	0.01	1.97	IYQKAFDLI	9		0.0343	Canonical	KPNA5	ENSG00000196911.10	protein_coding	Y
	0.01	1.97	IYQKAFDLI	9		0.0343	Canonical	KPNA1	ENSG00000114030.13	protein_coding	Y
	0.01	1.97	IYQKAFDLI	9		0.0343	Canonical	KPNA6	ENSG00000025800.14	protein_coding	Y
	0.01	2.13	IYAPPLPSL	9		0.0073	Canonical	AKAP1	ENSG00000121057.13	protein_coding	Y
	PF		TYAQRTQLF	9		0.0036	Canonical	MKLN1	ENSG00000128585.18	protein_coding
	0.01	1.92	LYANMFERL	9		0.0425	Canonical	FKBP4	ENSG00000004478.8	protein_coding	Y
	0.01	3.58	RYLEKNVKL	9		0.0224	Canonical	TGS1	ENSG00000137574.10	protein_coding	Y
	0.01	1.95	AYVLNIVRF	9		0.0138	Canonical	ATP1B1	ENSG00000143153.12	protein_coding	Y
	PF		AYVELVHHI	9		0.0074	Canonical	CDK5RAP1	ENSG00000101391.21	protein_coding
	PF		VYKILSTHL	9		0.0569	Canonical	CLOCK	ENSG00000134852.15	protein_coding
	0.01	2.39	KYPHYFPLL	9		0.0091	Canonical	AC006538.1	ENSG00000172009.15	protein_coding	Y
	0.01	1.99	IYNSQREHF	9		0.0152	Canonical	SIPA1L1	ENSG00000197555.9	protein_coding	Y
	0.01	2.2	SYYSPSIGF	9		0.0157	Canonical	YTHDF2	ENSG00000198492.16	protein_coding	Y
	0.01	1.82	VYLPNINKI	9		0.0032	Canonical	RHOBTB1	ENSG00000072422.17	protein_coding	Y
	0.01	2	VYENVSHFL	9		0.0396	Canonical	SLC25A32	ENSG00000164933.12	protein_coding	Y
	0.01	2	VYENVSHFL	9		0.0396	Canonical	AC012213.5	ENSG00000285982.1	protein_coding	Y
	0.01	2.75	NYTLVSHLI	9		0.0586	Canonical	MARS	ENSG00000166986.15	protein_coding	Y
	0.01	1.96	NYAWVYYHL	9		0.0351	Canonical	IFIT3	ENSG00000119917.14	protein_coding	Y
	0.01	2.94	RYKEKVAEL	9		0.0553	Canonical	KAT7	ENSG00000136504.12	protein_coding	Y
	PF		LYEKDIQLF	9		0.0256	Canonical	AKTIP	ENSG00000166971.17	protein_coding
	PF		LYEKDIQLF	9		0.0256	Canonical	AC010342.1	ENSG00000226432.3	processed_pseudogene
	0.01	2.22	EYMIQFNRL	9		0.0894	Canonical	HELZ2	ENSG00000130589.16	protein_coding	Y
	0.01	2.18	IYNHITTRV	9		0.157	Canonical	ADD1	ENSG00000087274.17	protein_coding	Y
	0.01	3.11	QYNPHVHQL	9		0.0073	Canonical	DLG5	ENSG00000151208.17	protein_coding	Y
	0.01	1.82	EYLKHHNRI	9		0.1577	Canonical	GZF1	ENSG00000125812.16	protein_coding	Y
	0.01	2	SYGDILHVI	9		0.0157	Canonical	DLG3	ENSG00000082458.12	protein_coding	Y
	0.01	2.09	EYTLMRATF	9		0.1115	Canonical	IRS2	ENSG00000185950.9	protein_coding	Y
	0.01	2.83	KYFHPPAHL	9		0.0193	Canonical	MBNL1	ENSG00000152601.17	protein_coding	Y
	0.01	2.83	KYFHPPAHL	9		0.0193	Canonical	MBNL2	ENSG00000139793.18	protein_coding	Y
	0.01	2.83	KYFHPPAHL	9		0.0193	Canonical	MBNL3	ENSG00000076770.14	protein_coding	Y
	0.01	2.12	KYDEIFYNL	9		0.0099	Canonical	EHD2	ENSG00000024422.12	protein_coding	Y
	0.01	2.19	TYLEKAIKI	9		0.0183	Canonical	USP7	ENSG00000187555.15	protein_coding	Y
	0.01	2.79	KYFAQALKL	9		0.0255	Canonical	EMC2	ENSG00000104412.8	protein_coding	Y
	0.05	1.88	KYLKVFYKF	9		0.002	Canonical	ZNF91	ENSG00000167232.14	protein_coding	Y
	0.05	1.88	KYLKVFYKF	9		0.002	Canonical	ZNF726	ENSG00000213967.10	protein_coding	Y
	0.05	1.88	KYLKVFYKF	9		0.002	Canonical	ZNF254	ENSG00000213096.10	protein_coding	Y
	0.01	2.08	AYLESFYKF	9		0.0009	Canonical	ATP6V0D1	ENSG00000159720.12	protein_coding	Y
	0.01	2.18	VYGPLPQSF	9		0.0008	Canonical	COX4I1	ENSG00000131143.8	protein_coding	Y
	0.01	2.54	LYSSKLYRF	9		0.0041	Canonical	KCTD20	ENSG00000112078.14	protein_coding	Y
	0.01	2.55	IYIKHPHLF	9		0.0004	Canonical	DNTTIP1	ENSG00000101457.13	protein_coding	Y
	0.01	2.62	QYTPHSHQF	9		0.0039	Canonical	RPTOR	ENSG00000141564.15	protein_coding	Y
	0.01	1.91	EYDLIVHQL	9		0.0932	Canonical	VPS26A	ENSG00000122958.15	protein_coding	Y
	0.01	1.83	VYNSEYYHF	9		0.001	Canonical	PTK7	ENSG00000112655.16	protein_coding	Y
	0.01	2.02	RYLRVEHHF	9		0.0035	Canonical	ACACB	ENSG00000076555.15	protein_coding	Y
	0.01	2.24	VYTLLTTHL	9		0.021	Canonical	C11orf80	ENSG00000173715.16	protein_coding	Y
	0.01	1.87	KYITKSFNF	9		0.0025	Canonical	PARN	ENSG00000140694.17	protein_coding	Y
	0.01	2.37	RYPDNLKHL	9		0.0463	Canonical	CCDC59	ENSG00000133773.12	protein_coding	Y
	0.01	2.14	SYQKVIELF	9		0.0012	Canonical	PBK	ENSG00000168078.10	protein_coding	Y
	0.01	2.8	YAHIYHQHF	9		0.7677	Canonical	MOB1A	ENSG00000114978.18	protein_coding	Y
	0.01	2.8	YAHIYHQHF	9		0.7677	Canonical	MOB1B	ENSG00000173542.8	protein_coding	Y
	0.01	2.18	EYAAQLQRF	9		0.0171	Canonical	TRIP10	ENSG00000125733.18	protein_coding	Y
	PF		TYNRIINQI	9		0.0204	Canonical	ANGPTL2	ENSG00000136859.10	protein_coding
	0.01	2.05	TYLKKIPGF	9		0.0058	Canonical	SERINC3	ENSG00000132824.14	protein_coding	Y
	0.01	2.82	VYIEKNDKL	9		0.0388	Canonical	ERBB3	ENSG00000065361.15	protein_coding	Y
	0.01	2.02	TYGERFCYL	9		0.1412	Canonical	DPY19L4	ENSG00000156162.16	protein_coding	Y
	0.01	1.38	EYMEHVYLI	9		0.0158	Canonical	OSBPL2	ENSG00000130703.16	protein_coding	Y
	0.01	1.97	RYTQDLGAF	9		0.2099	Canonical	CLCN2	ENSG00000114859.16	protein_coding	Y
	PF		VYSAGVYRL	9		0.0105	Canonical	ANAPC2	ENSG00000176248.9	protein_coding
	0.01	2.17	VYMDWYEKF	9		0.0009	Canonical	SNRNP200	ENSG00000144028.15	protein_coding	Y
	0.01	2.47	KYKEAAHLL	9		0.0117	Canonical	KLC4	ENSG00000137171.15	protein_coding	Y
	0.01	2.47	KYKEAAHLL	9		0.0117	Canonical	KLC2	ENSG00000174996.11	protein_coding	Y
	0.01	1.98	QYTHKIYHL	9		0.0193	Canonical	PITPNB	ENSG00000180957.17	protein_coding	Y
	0.01	1.98	QYTHKIYHL	9		0.0193	Canonical	PITPNA	ENSG00000174238.14	protein_coding	Y
	0.01	1.86	RYASINAHL	9		0.0301	Canonical	CSNK1A1	ENSG00000113712.18	protein_coding	Y
	0.01	1.86	RYASINAHL	9		0.0301	Canonical	CSNK1A1L	ENSG00000180138.7	protein_coding	Y
	0.01	2.59	GYASRFIVI	9		0.2361	Canonical	RPIA	ENSG00000153574.9	protein_coding	Y
	0.01	2.24	HYAHLIKTF	9		0.0099	Canonical	DOCK1	ENSG00000150760.12	protein_coding	Y
	0.01	3	KYVKVFNKF	9		0.0016	Canonical	ZNF675	ENSG00000197372.9	protein_coding	Y
	0.01	2.2	KYNLINEYF	9		0.0076	Canonical	HS2ST1	ENSG00000153936.17	protein_coding	Y
	0.01	2.2	KYNLINEYF	9		0.0076	Canonical	AC093155.3	ENSG00000267561.2	protein_coding	Y
	0.01	2.09	IYLSKPTHW	9		0.0066	Canonical	POLR2B	ENSG00000047315.16	protein_coding	Y
	0.01	3.41	KYVKDFHKF	9		0.0014	Canonical	ZNF724	ENSG00000196081.9	protein_coding	Y
	0.01	3.41	KYVKDFHKF	9		0.0014	Canonical	AC092329.3	ENSG00000283201.1	protein_coding	Y
	0.01	3.83	RYQTKFRHL	9		0.0393	Canonical	CEP89	ENSG00000121289.18	protein_coding	Y
	0.01	2.5	RYQEVDRRF	9		0.0152	Canonical	YTHDC1	ENSG00000083896.12	protein_coding	Y
	0.01	2.09	TYITSVSRL	9		0.0306	Canonical	OSGIN2	ENSG00000164823.11	protein_coding	Y
	0.01	2.18	SYLNSVQRL	9		0.0126	Canonical	NUPL2	ENSG00000136243.17	protein_coding	Y
	0.01	1.93	RYQDIIHSI	9		0.003	Canonical	BAZ1B	ENSG00000009954.11	protein_coding	Y
	0.01	2.45	VYLDKFIRL	9		0.0043	Canonical	GNL3L	ENSG00000130119.16	protein_coding	Y
	0.01	2.45	VYLDKFIRL	9		0.0043	Canonical	GNL3LP1	ENSG00000215032.2	processed_pseudogene	Y
	0.01	2.45	VYLDKFIRL	9		0.0043	Canonical	ERCC8	ENSG00000049167.14	protein_coding	Y
	0.01	2.54	EYPKFLKRF	9		0.0231	Canonical	COL4A3BP	ENSG00000113163.16	protein_coding	Y
	0.01	2.59	TYDYNFHSF	9		0.0045	Canonical	ASH1L	ENSG00000116539.13	protein_coding	Y
	0.01	1.98	YYAKEIHKF	9		0.0006	Canonical	TGFB3	ENSG00000119699.7	protein_coding	Y
	0.01	2.16	VYSFGFERL	9		0.0508	Canonical	SLC30A6	ENSG00000152683.14	protein_coding	Y
	0.01	2.85	KYLGQLHYL	9		0.0087	Canonical	PTPN23	ENSG00000076201.15	protein_coding	Y
	0.01	1.51	VYNAVANLW	9		0.0251	Canonical	SMPDL3A	ENSG00000172594.13	protein_coding	Y
	0.01	2.66	SYLTIHHRI	9		0.008	Canonical	RBAK	ENSG00000146587.18	protein_coding	Y
	0.01	2.66	SYLTIHHRI	9		0.008	Canonical	ZNF12	ENSG00000164631.19	protein_coding	Y
	0.01	2	TYQSITERI	9		0.0176	Canonical	EXOC4	ENSG00000131558.15	protein_coding	Y
	0.01	2.46	IYTRLLPAL	9		0.1304	Canonical	ABHD14A-ACY1	ENSG00000114786.16	protein_coding	Y
	0.01	2.46	IYTRLLPAL	9		0.1304	Canonical	ACY1	ENSG00000243989.9	protein_coding	Y
	0.01	2.49	TYTDRVFFL	9		0.0317	Canonical	PLXNB2	ENSG00000196576.15	protein_coding	Y
	0.01	1.77	IYIINVHSM	9		0.0298	Canonical	DENND3	ENSG00000105339.10	protein_coding	Y
	0.01	2.08	IYIKQIKTF	9		0.0017	Canonical	RBL2	ENSG00000103479.16	protein_coding	Y
	0.01	2.21	EYMKHTRLF	9		0.0134	Canonical	FLII	ENSG00000177731.16	protein_coding	Y
	0.01	1.89	YYAEVETRI	9		0.0579	Canonical	EXOC2	ENSG00000112685.14	protein_coding	Y
	0.01	1.77	NYLSIFRKF	9		0.0043	Canonical	CAPN1	ENSG00000014216.15	protein_coding	Y
	0.01	2.19	LYDIILKNF	9		0.0441	Canonical	PSME1	ENSG00000092010.15	protein_coding	Y
	0.01	2.09	TYLNYVVHL	9		0.0101	Canonical	ZNF292	ENSG00000188994.13	protein_coding	Y
	0.01	2.56	RYDEIRRHW	9		0.0378	Canonical	RPL7A	ENSG00000148303.17	protein_coding	Y
	0.01	2.56	RYDEIRRHW	9		0.0378	Canonical	RPL7AP6	ENSG00000242071.3	processed_pseudogene	Y
	0.01	2.56	RYDEIRRHW	9		0.0378	Canonical	RPL7AP66	ENSG00000175886.10	processed_pseudogene	Y
	0.01	2.56	RYDEIRRHW	9		0.0378	Canonical	RPL7AP53	ENSG00000235962.5	processed_pseudogene	Y
	0.01	2.56	RYDEIRRHW	9		0.0378	Canonical	AC044787.1	ENSG00000213862.4	processed_pseudogene	Y
	0.01	2.56	RYDEIRRHW	9		0.0378	Canonical	AC000089.1	ENSG00000235776.2	processed_pseudogene	Y
	PF		EYLADLYHF	9		0.0089	Canonical	SH3BP1	ENSG00000100092.23	protein_coding
	PF		EYLADLYHF	9		0.0089	Canonical	Z83844.3	ENSG00000285304.1	protein_coding
	0.01	2.47	VYAKLLHRY	9		0.1219	Canonical	FBXO31	ENSG00000103264.18	protein_coding	Y
	PF		GYTSRWYHL	9		0.1076	Canonical	KDM1B	ENSG00000165097.15	protein_coding
	0.01	2.26	AYSRVQYQF	9		0.0045	Canonical	BCAR3	ENSG00000137936.18	protein_coding	Y
	0.01	2.1	RFEEKHAYF	9		0.1087	Canonical	CRNKL1	ENSG00000101343.14	protein_coding	Y
	0.01	1.85	IYFEYSHAF	9		0.0023	Canonical	MSH3	ENSG00000113318.11	protein_coding	Y
	0.01	1.68	LYGRHFNYL	9		0.0895	Canonical	TENT4B	ENSG00000121274.12	protein_coding	Y
	0.01	1.92	KFAEEFYSF	9		0.007	Canonical	CDCA7L	ENSG00000164649.20	protein_coding	Y
	0.01	2.21	GYIERPQLI	9		0.0445	Canonical	TENT2	ENSG00000164329.13	protein_coding	Y
	0.01	2.06	TYKDYVDLF	9		0.0064	Canonical	PRKDC	ENSG00000253729.7	protein_coding	Y
	0.01	1.59	KYKDIQDKL	9		0.0421	Canonical	SMC6	ENSG00000163029.16	protein_coding	Y
	0.01	2.14	VQNGKHFKF	9		0.3195	Canonical	FABP1	ENSG00000163586.9	protein_coding	Y
	0.01	1.85	VYVSRPSHF	9		0.0043	Canonical	STAT2	ENSG00000170581.14	protein_coding	Y
	0.01	2.17	TYQDIFRDF	9		0.0077	Canonical	ACAP2	ENSG00000114331.14	protein_coding	Y
	PF		KFNPVSFTW	9		0.0199	Canonical	KLHDC3	ENSG00000124702.18	protein_coding
	0.01	2.03	RWPKKSAEF	9		0.041	Canonical	RPL17-C18orf32	ENSG00000215472.10	protein_coding	Y
	0.01	2.03	RWPKKSAEF	9		0.041	Canonical	RPL17	ENSG00000265681.7	protein_coding	Y
	0.01	2.03	RWPKKSAEF	9		0.041	Canonical	AC113935.1	ENSG00000226084.5	processed_pseudogene	Y
	0.01	2.03	RWPKKSAEF	9		0.041	Canonical	AL049597.1	ENSG00000230721.1	processed_pseudogene	Y
	0.01	2.03	RWPKKSAEF	9		0.041	Canonical	BX679664.3	ENSG00000244716.3	processed_pseudogene	Y
	0.01	2.03	RWPKKSAEF	9		0.041	Canonical	AC064799.1	ENSG00000212664.5	processed_pseudogene	Y
	0.01	3.07	HYAALAHYF	9		0.0065	Canonical	RHPN2	ENSG00000131941.8	protein_coding	Y
	0.01	3.07	HYAALAHYF	9		0.0065	Canonical	AC142384.1	ENSG00000259882.2	unprocessed_pseudogene	Y
	0.01	2.99	RYNEKCFKL	9		0.041	Canonical	KLHL24	ENSG00000114796.16	protein_coding	Y
	0.01	2.75	KYPNVFKKI	9		0.0193	Canonical	AHCYL1	ENSG00000168710.18	protein_coding	Y
	0.01	2.35	QYMELFNKI	9		0.0121	Canonical	MED20	ENSG00000124641.16	protein_coding	Y
	0.01	1.6	VYNPTPNSL	9		0.0089	Canonical	COL12A1	ENSG00000111799.21	protein_coding	Y
	0.01	1.21	LYEEINQVF	9		0.0367	Canonical	CYP20A1	ENSG00000119004.15	protein_coding	Y
	0.01	2.12	SYMPTVSHL	9		0.0035	Canonical	BSCL2	ENSG00000168000.14	protein_coding	Y
	0.01	2.12	SYMPTVSHL	9		0.0035	Canonical	HNRNPUL2-BSCL2	ENSG00000234857.2	protein_coding	Y
	PF		EYDNFFQHL	9		0.1092	Canonical	CLASP1	ENSG00000074054.18	protein_coding
	0.01	1.97	IYSIDFTRF	9		0.0059	Canonical	UNC119B	ENSG00000175970.11	protein_coding	Y
	0.01	1.73	IYNPTTGEF	9		0.0075	Canonical	ATP1B3	ENSG00000069849.11	protein_coding	Y
	0.01	1.99	KYNANFVTF	9		0.0012	Canonical	KDM2A	ENSG00000173120.15	protein_coding	Y
	0.01	2.18	LYTEKFEEF	9		0.0038	Canonical	TXLNA	ENSG00000084652.16	protein_coding	Y
	0.01	2.48	RYAVEILTW	9		0.0135	Canonical	UBR2	ENSG00000024048.10	protein_coding	Y
	0.01	1.38	KYPENFFLL	9		0.0036	Canonical	PPP1CA	ENSG00000172531.15	protein_coding	Y
	0.01	1.38	KYPENFFLL	9		0.0036	Canonical	PPP1CC	ENSG00000186298.11	protein_coding	Y
	0.01	1.38	KYPENFFLL	9		0.0036	Canonical	PPP1CB	ENSG00000213639.10	protein_coding	Y
	0.01	2.02	SYLDRTEQL	9		0.0191	Canonical	WDR18	ENSG00000065268.10	protein_coding	Y
	0.01	1.94	SYSSTFHSL	9		0.007	Canonical	NBPF20	ENSG00000162825.16	protein_coding	Y
	0.01	1.94	SYSSTFHSL	9		0.007	Canonical	NBPF10	ENSG00000271425.8	protein_coding	Y
	0.01	1.94	SYSSTFHSL	9		0.007	Canonical	NBPF19	ENSG00000271383.7	protein_coding	Y
	0.01	1.94	SYSSTFHSL	9		0.007	Canonical	AC242842.3	ENSG00000286185.1	protein_coding	Y
	0.01	1.94	SYSSTFHSL	9		0.007	Canonical	NBPF14	ENSG00000270629.6	protein_coding	Y
	0.01	1.94	SYSSTFHSL	9		0.007	Canonical	NBPF12	ENSG00000268043.7	protein_coding	Y
	0.01	1.94	SYSSTFHSL	9		0.007	Canonical	NBPF26	ENSG00000273136.7	protein_coding	Y
	0.01	1.94	SYSSTFHSL	9		0.007	Canonical	NBPF8	ENSG00000270231.4	transcribed_unprocessed_pseudogene	Y
	0.01	1.94	SYSSTFHSL	9		0.007	Canonical	NBPF9	ENSG00000269713.7	protein_coding	Y
	0.01	1.94	SYSSTFHSL	9		0.007	Canonical	NBPF11	ENSG00000263956.6	protein_coding	Y
	0.01	1.94	SYSSTFHSL	9		0.007	Canonical	NBPF15	ENSG00000266338.6	protein_coding	Y
	0.01	1.94	SYSSTFHSL	9		0.007	Canonical	NBPF25P	ENSG00000272150.5	transcribed_unprocessed_pseudogene	Y
	0.01	2.16	VYSQILRKL	9		0.0153	Canonical	NUP85	ENSG00000125450.11	protein_coding	Y
	0.01	2.37	KYNPTWHCI	9		0.0339	Canonical	DYNLL2	ENSG00000264364.3	protein_coding	Y
	0.01	2.37	KYNPTWHCI	9		0.0339	Canonical	DYNLL1	ENSG00000088986.11	protein_coding	Y
	0.01	1.41	SYMEVPTYL	9		0.0072	Canonical	LAPTM5	ENSG00000162511.8	protein_coding	Y
	0.01	2.43	RYALQMEQL	9		0.0866	Canonical	KRT18	ENSG00000111057.11	protein_coding	Y
	0.01	2.43	RYALQMEQL	9		0.0866	Canonical	KRT18P52	ENSG00000237007.4	processed_pseudogene	Y
	0.01	2.43	RYALQMEQL	9		0.0866	Canonical	KRT18P65	ENSG00000215807.4	processed_pseudogene	Y
	0.01	2.43	RYALQMEQL	9		0.0866	Canonical	KRT18P49	ENSG00000214720.4	processed_pseudogene	Y
	0.01	2.43	RYALQMEQL	9		0.0866	Canonical	KRT18P36	ENSG00000226246.1	processed_pseudogene	Y
	0.01	3.1	KYLSGIAHF	9		0.0022	Canonical	PMPCA	ENSG00000165688.12	protein_coding	Y
	0.01	2.79	SYIDVAVKL	9		0.0158	Canonical	TXNDC16	ENSG00000087301.9	protein_coding	Y
	0.01	1.9	VYAQKHQQL	9		0.0124	Canonical	TRIM33	ENSG00000197323.12	protein_coding	Y
	0.01	2.12	YYIFIPSKF	9		0.0027	Canonical	DDX47	ENSG00000213782.7	protein_coding	Y
	0.01	2.12	YYIFIPSKF	9		0.0027	Canonical	APOLD1	ENSG00000178878.12	protein_coding	Y
	0.01	2.42	VYTTMAEHF	9		0.0056	Canonical	TSPAN1	ENSG00000117472.10	protein_coding	Y
	0.01	2.64	RYPGKFYRV	9		0.0492	Canonical	MAP3K20	ENSG00000091436.17	protein_coding	Y
	0.01	1.27	EYNNNFHVL	9		0.0525	Canonical	IPMK	ENSG00000151151.6	protein_coding	Y
	0.01	1.27	EYNNNFHVL	9		0.0525	Canonical	IPMKP1	ENSG00000226507.1	processed_pseudogene	Y
	0.01	2.04	GYIESVQHI	9		0.0296	Canonical	MGME1	ENSG00000125871.14	protein_coding	Y
	PF		KYVKVFHQF	9		0.0006	Canonical	ZNF486	ENSG00000256229.8	protein_coding
	PF		KYVKVFHQF	9		0.0006	Canonical	ZNF826P	ENSG00000231205.11	transcribed_unprocessed_pseudogene
	0.01	1.83	TYISWKEEL	9		0.0508	Canonical	VPS13C	ENSG00000129003.18	protein_coding	Y
	0.01	2.66	AYLEAIHNF	9		0.0008	Canonical	AP2S1	ENSG00000042753.11	protein_coding	Y
	0.01	2.69	DYSSILQKF	9		0.0097	Canonical	FNBP1	ENSG00000187239.17	protein_coding	Y
	PF		VYVQHPITF	9		0.0012	Canonical	LITAF	ENSG00000189067.12	protein_coding
	0.01	1.76	IYDSVKVYF	9		0.0055	Canonical	SLC25A3	ENSG00000075415.12	protein_coding	Y
	0.01	2.06	YYQNYFEKL	9		0.0118	Canonical	PATL1	ENSG00000166889.14	protein_coding	Y
	0.01	2.06	YYQNYFEKL	9		0.0118	Canonical	AC007842.1	ENSG00000269069.1	processed_pseudogene	Y
	0.01	2.83	NYLNHWNHF	9		0.005	Canonical	FN3K	ENSG00000167363.14	protein_coding	Y
	0.01	2.31	IYKIDFVRF	9		0.0113	Canonical	UNC119	ENSG00000109103.11	protein_coding	Y
	PF		AYHNWRHAF	9		0.049	Canonical	PDE5A	ENSG00000138735.16	protein_coding
	0.01	2.58	VYPPIRHHL	9		0.0076	Canonical	VPS37A	ENSG00000155975.10	protein_coding	Y
	0.01	3.05	KYITDVVKL	9		0.0151	Canonical	UTP20	ENSG00000120800.5	protein_coding	Y
	0.01	2.32	VYSPHVLNL	9		0.0042	Canonical	DNM2	ENSG00000079805.16	protein_coding	Y
	0.01	2.32	VYSPHVLNL	9		0.0042	Canonical	DNM3	ENSG00000197959.14	protein_coding	Y
	0.01	2.03	YYFDSYAHF	9		0.0013	Canonical	PRMT8	ENSG00000111218.11	protein_coding	Y
	0.01	2.03	YYFDSYAHF	9		0.0013	Canonical	PRMT1	ENSG00000126457.21	protein_coding	Y
	0.01	2.03	YYFDSYAHF	9		0.0013	Canonical	PRMT1P1	ENSG00000270706.1	processed_pseudogene	Y
	0.01	2.32	VYSPHVLNL	9		0.0042	Canonical	DNM1	ENSG00000106976.20	protein_coding	Y
	0.01	2.13	EYVEKFYRI	9		0.0233	Canonical	RAD50	ENSG00000113522.14	protein_coding	Y
	0.01	2.13	EYVEKFYRI	9		0.0233	Canonical	AC116366.3	ENSG00000283782.2	protein_coding	Y
	0.01	2.78	IYSTKLYRF	9		0.0023	Canonical	BTBD10	ENSG00000148925.10	protein_coding	Y
	0.01	2.78	IYSTKLYRF	9		0.0023	Canonical	BTBD10P1	ENSG00000257675.1	processed_pseudogene	Y
	0.01	2.09	VYVDKVEKM	9	1xOxidation [M9]	0.0198	Canonical	AMOT	ENSG00000126016.15	protein_coding	Y
	0.01	1.81	SYPDNFLHI	9		0.0107	Canonical	ATG5	ENSG00000057663.16	protein_coding	Y
	0.01	2.13	TYKVISNEF	9		0.0161	Canonical	UBE3A	ENSG00000114062.20	protein_coding	Y
	0.01	2.13	TYKVISNEF	9		0.0161	Canonical	UBE3AP2	ENSG00000228941.1	processed_pseudogene	Y
	0.01	1.97	VYDVVELKF	9		0.0152	Canonical	CPSF7	ENSG00000149532.15	protein_coding	Y
	0.01	2.07	AYTLLLHTW	9		0.0181	Canonical	DOCK2	ENSG00000134516.17	protein_coding	Y
	0.01	1.76	AYLNITKHL	9		0.0498	Canonical	POLK	ENSG00000122008.15	protein_coding	Y
	0.01	1.74	KYPEIKSLM	9		0.0586	Canonical	DEGS1	ENSG00000143753.13	protein_coding	Y
	0.01	1.46	VFYPYPQYF	9		0.003	Canonical	HSDL1	ENSG00000103160.12	protein_coding	Y
	0.01	1.61	KYRRYHPLF	9		0.0753	Canonical	ARAP1	ENSG00000186635.14	protein_coding	Y
	0.01	2.11	NYTKAMRLF	9		0.034	Canonical	ADI1	ENSG00000182551.14	protein_coding	Y
	0.01	1.58	NYSPYVNYF	9		0.0032	Canonical	DPY19L4	ENSG00000156162.16	protein_coding	Y
	0.01	1.7	NYLSHHLTI	9		0.0208	Canonical	PAIP1	ENSG00000172239.14	protein_coding	Y
	0.01	1.7	NYLSHHLTI	9		0.0208	Canonical	AC026271.1	ENSG00000174977.8	processed_pseudogene	Y
	0.01	1.87	GYSEHFVEF	9		0.0059	Canonical	GMPR2	ENSG00000100938.17	protein_coding	Y
	0.01	1.87	GYSEHFVEF	9		0.0059	Canonical	GMPR	ENSG00000137198.9	protein_coding	Y
	0.01	2.17	RISLPLPNF	9		0.8779	Canonical	VIM	ENSG00000026025.16	protein_coding	Y
	0.01	2.65	KYTTLIAKL	9		0.0296	Canonical	TES	ENSG00000135269.18	protein_coding	Y
	0.01	1.98	TYMKDLYQL	9		0.008	Canonical	ARHGAP18	ENSG00000146376.11	protein_coding	Y
	0.01	1.97	RYLSKVLEL	9		0.0082	Canonical	C15orf40	ENSG00000169609.14	protein_coding	Y
	0.01	1.25	TYSYVPPQW	9		0.0167	Canonical	FAM168B	ENSG00000152102.18	protein_coding	Y
	0.01	3.08	AYLLNLNHL	9		0.0485	Canonical	TRAM1	ENSG00000067167.8	protein_coding	Y
	0.01	2.16	KYMAEALLL	9		0.0211	Canonical	TOMM70	ENSG00000154174.7	protein_coding	Y
	PF		NYDKVEKLF	9		0.0672	Canonical	CSTF3	ENSG00000176102.13	protein_coding
	0.01	2.97	RYLELISSI	9		0.0233	Canonical	IFT122	ENSG00000163913.11	protein_coding	Y
	0.01	2.18	RYLDEINLL	9		0.0111	Canonical	GNA15	ENSG00000060558.3	protein_coding	Y
	0.01	2.14	SYGDILHRM	9		0.0292	Canonical	INTS10	ENSG00000104613.12	protein_coding	Y
	PF		KYNDNFFGL	9		0.0434	Canonical	UBR7	ENSG00000012963.15	protein_coding
	PF		KYNDNFFGL	9		0.0434	Canonical	AL110118.2	ENSG00000259066.5	protein_coding
	0.01	1.75	EYTDVYPEI	9		0.1212	Canonical	MAGED1	ENSG00000179222.17	protein_coding	Y
	0.01	1.75	EYTDVYPEI	9		0.1212	Canonical	MAGED2	ENSG00000102316.17	protein_coding	Y
	0.01	2.79	RYLQTLTTI	9		0.0189	Canonical	STOM	ENSG00000148175.12	protein_coding	Y
	0.01	2.16	RYIANTVEL	9		0.022	Canonical	RPN2	ENSG00000118705.17	protein_coding	Y
	0.01	2.12	RYIDRIHIF	9		0.0008	Canonical	PRPF8	ENSG00000174231.17	protein_coding	Y
	0.01	1.82	VYLPTHTSL	9		0.0075	Canonical	MYLIP	ENSG00000007944.15	protein_coding	Y
	0.05	1.4	VYPPHSHSI	9		0.0078	Canonical	STAT6	ENSG00000166888.12	protein_coding	Y
	0.01	2.07	VFSTVVIHF	9		0.0162	Canonical	HMGCR	ENSG00000113161.16	protein_coding	Y
	0.01	2.75	KYIKEAVRL	9		0.0153	Canonical	FRMD6	ENSG00000139926.15	protein_coding	Y
	0.01	2.1	IYVHDLLTF	9		0.0076	Canonical	VPS39	ENSG00000166887.15	protein_coding	Y
	0.01	1.3	AYTSPPSFF	9		0.0158	Canonical	SYNPO2	ENSG00000172403.11	protein_coding	Y
	PF		EFVAKGHLF	9		0.1838	Canonical	MED18	ENSG00000130772.14	protein_coding
	PF		LYPEVFEKF	9		0.0014	Canonical	ATAD2	ENSG00000156802.13	protein_coding
	0.01	2.51	RFIGATANF	9		0.0369	Canonical	RNASEH2C	ENSG00000172922.9	protein_coding	Y
	0.01	2.67	VYQHGLTGF	9		0.0223	Canonical	BAK1	ENSG00000030110.13	protein_coding	Y
	0.01	2.67	VYQHGLTGF	9		0.0223	Canonical	BAK1P2	ENSG00000236616.3	processed_pseudogene	Y
	0.01	2.31	KYMEDVTQI	9		0.0162	Canonical	PPM1D	ENSG00000170836.11	protein_coding	Y
	PF		IYQKRCEAF	9		0.0349	Canonical	TKT	ENSG00000163931.16	protein_coding
	0.01	2.46	YYQHIVTTL	9		0.0062	Canonical	PCYOX1	ENSG00000116005.12	protein_coding	Y
	0.01	2.34	RYLTVATVF	9		0.0125	Canonical	AC092143.1	ENSG00000198211.8	protein_coding	Y
	0.01	2.34	RYLTVATVF	9		0.0125	Canonical	TUBB3	ENSG00000258947.7	protein_coding	Y
	0.01	2.34	RYLTVATVF	9		0.0125	Canonical	TUBB6	ENSG00000176014.12	protein_coding	Y
	0.01	2.84	KYCQVIRVI	9		0.2185	Canonical	RPL3	ENSG00000100316.16	protein_coding	Y
	0.01	2.84	KYCQVIRVI	9		0.2185	Canonical	RPL3P12	ENSG00000232496.2	processed_pseudogene	Y
	0.01	2.99	RYKAPFHQL	9		0.0089	Canonical	SMARCA1	ENSG00000102038.15	protein_coding	Y
	0.01	2.99	RYKAPFHQL	9		0.0089	Canonical	SMARCA5	ENSG00000153147.6	protein_coding	Y
	0.01	2.04	KYQELQVLF	9		0.0018	Canonical	VPS37B	ENSG00000139722.7	protein_coding	Y
	0.01	2.04	KYQELQVLF	9		0.0018	Canonical	AC027290.2	ENSG00000280138.1	TEC	Y
	0.01	2.18	RYLTVAAVF	9		0.0181	Canonical	TUBB4B	ENSG00000188229.6	protein_coding	Y
	0.01	2.18	RYLTVAAVF	9		0.0181	Canonical	TUBB	ENSG00000196230.13	protein_coding	Y
	0.01	2.18	RYLTVAAVF	9		0.0181	Canonical	TUBB4A	ENSG00000104833.12	protein_coding	Y
	0.01	2.18	RYLTVAAVF	9		0.0181	Canonical	TUBBP2	ENSG00000214222.2	processed_pseudogene	Y
	PF		KYPLLLDNI	9		0.1207	Canonical	ARHGEF12	ENSG00000196914.9	protein_coding
	0.01	2.05	IYPMKNHMF	9		0.0095	Canonical	RALGAPA1	ENSG00000174373.16	protein_coding	Y
	0.01	2.05	IYPMKNHMF	9		0.0095	Canonical	RALGAPA2	ENSG00000188559.15	protein_coding	Y
	0.01	2.05	IYPMKNHMF	9		0.0095	Canonical	RALGAPA1P1	ENSG00000229419.1	processed_pseudogene	Y
	0.01	2.01	VYVKDLSSF	9		0.0079	Canonical	KIF3B	ENSG00000101350.8	protein_coding	Y
	0.05	2.18	KYAALFSQM	9		0.0622	Canonical	SAMD4A	ENSG00000020577.13	protein_coding	Y
	0.05	2.18	KYAALFSQM	9		0.0622	Canonical	SAMD4B	ENSG00000179134.15	protein_coding	Y
	0.01	1.67	RYFENPQVI	9		0.0186	Canonical	TRRAP	ENSG00000196367.13	protein_coding	Y
	0.05	1.43	RYNPNLNTW	9		0.0066	Canonical	KLHL11	ENSG00000178502.6	protein_coding	Y
	0.05	1.39	PYLDSFYEY	9		0.2067	Canonical	RNF103	ENSG00000239305.7	protein_coding	Y
	0.01	2.19	KYIDQKFVL	9		0.0343	Canonical	PPP2R5D	ENSG00000112640.15	protein_coding	Y
	0.01	2.19	KYIDQKFVL	9		0.0343	Canonical	PPP2R5C	ENSG00000078304.19	protein_coding	Y
	0.01	2.19	KYIDQKFVL	9		0.0343	Canonical	PPP2R5E	ENSG00000154001.14	protein_coding	Y
	0.01	2.19	KYIDQKFVL	9		0.0343	Canonical	AC009263.1	ENSG00000234639.1	processed_pseudogene	Y
	PF		FYRSYFSQF	9		0.0322	Canonical	PXK	ENSG00000168297.15	protein_coding
	0.01	2.22	KYFLKPEVL	9		0.039	Canonical	NCEH1	ENSG00000144959.10	protein_coding	Y
	0.05	1.42	IYGLLKNPF	9		0.1365	Canonical	YME1L1	ENSG00000136758.18	protein_coding	Y
	0.01	2.15	LYRLQFNEF	9		0.1017	Canonical	ARL4AP1	ENSG00000122872.8	processed_pseudogene	Y
	0.01	2.15	LYRLQFNEF	9		0.1017	Canonical	ARL4A	ENSG00000122644.13	protein_coding	Y
	0.01	2.15	LYRLQFNEF	9		0.1017	Canonical	ARL4AP2	ENSG00000248780.1	processed_pseudogene	Y
	0.01	2.99	VYGSFASKL	9		0.0593	Canonical	AZIN1	ENSG00000155096.14	protein_coding	Y
	0.01	2.34	VYDTVFKHF	9		0.0037	Canonical	SP140L	ENSG00000185404.16	protein_coding	Y
	0.01	1.96	VYADQPHIF	9		0.0021	Canonical	ABHD4	ENSG00000100439.10	protein_coding	Y
	0.01	2.03	RWFDKSFTF	9		0.0046	Canonical	CPT1A	ENSG00000110090.13	protein_coding	Y
	0.01	2.1	RYIRDAHTF	9		0.0023	Canonical	ARHGAP35	ENSG00000160007.18	protein_coding	Y
	0.01	2.62	EYIRSLNQF	9		0.0097	Canonical	RMC1	ENSG00000141452.9	protein_coding	Y
	0.01	2.08	VYLHLRQTW	9		0.0181	Canonical	SLC44A2	ENSG00000129353.15	protein_coding	Y
	0.01	2.6	LYLDEAHSI	9		0.0356	Canonical	SPTLC2	ENSG00000100596.6	protein_coding	Y
	0.01	2.6	LYLDEAHSI	9		0.0356	Canonical	SPTLC3	ENSG00000172296.13	protein_coding	Y
	0.01	2.2	TYVSGTLRF	9		0.0064	Canonical	CEPT1	ENSG00000134255.14	protein_coding	Y
	0.01	2.29	KYGALVNNF	9		0.0048	Canonical	NSUN4	ENSG00000117481.10	protein_coding	Y
	PF		KYTHFIQSF	9		0.0029	Canonical	GBGT1	ENSG00000148288.13	protein_coding
	PF		KYIQRQQTI	9		0.0095	Canonical	MX2	ENSG00000183486.13	protein_coding
	0.01	2.36	RYIPTAAAF	9		0.007	Canonical	SEC61A1	ENSG00000058262.10	protein_coding	Y
	0.01	2.36	RYIPTAAAF	9		0.007	Canonical	SEC61A2	ENSG00000065665.21	protein_coding	Y
	PF		KFSNVTMLF	9		0.0207	Canonical	GUCY1A1	ENSG00000164116.16	protein_coding
	0.01	2.39	KYVTVYNLI	9		0.0308	Canonical	USP8	ENSG00000138592.14	protein_coding	Y
	0.01	2.65	RYPTSIASL	9		0.0333	Canonical	BUB3	ENSG00000154473.18	protein_coding	Y
	0.01	1.43	IYRAQLELF	9		0.0172	Canonical	FAM126B	ENSG00000155744.9	protein_coding	Y
	0.01	1.52	TYQVLAVTF	9		0.0062	Canonical	SNRNP40	ENSG00000060688.13	protein_coding	Y
	PF		VQPRNWLLF	9		0.1293	Canonical	MPC1	ENSG00000060762.19	protein_coding
	PF		RYNPRTNQW	9		0.019	Canonical	KLHL20	ENSG00000076321.11	protein_coding
	0.01	2.04	SYANVQDGF	9		0.0813	Canonical	ANKRD22	ENSG00000152766.6	protein_coding	Y
	0.01	2.03	RYSGNQVLF	9		0.0071	Canonical	AC008695.1	ENSG00000273217.1	protein_coding	Y
	0.01	2.03	RYSGNQVLF	9		0.0071	Canonical	RAPGEF6	ENSG00000158987.20	protein_coding	Y
	0.01	1.94	RYSEYAEEF	9		0.0061	Canonical	MTMR6	ENSG00000139505.11	protein_coding	Y
	PF		IYAHITKHY	9		0.293	Canonical	FOXK1	ENSG00000164916.11	protein_coding
	0.01	2.19	IWISKLPHF	9		0.0127	Canonical	TDRD7	ENSG00000196116.8	protein_coding	Y
	0.01	1.41	IYGAPGVEF	9		0.0075	Canonical	LLGL1	ENSG00000131899.11	protein_coding	Y
	0.01	1.41	IYGAPGVEF	9		0.0075	Canonical	LLGL2	ENSG00000073350.13	protein_coding	Y
	PF		GYPEVALHF	9		0.0048	Canonical	COPA	ENSG00000122218.16	protein_coding
	0.01	1.32	VLPSSLPTF	9		0.0367	Canonical	MUC5B	ENSG00000117983.17	protein_coding	Y
	0.01	2.39	AYSHLRYVF	9		0.0241	Canonical	FAT1	ENSG00000083857.14	protein_coding	Y
	0.01	1.98	RYFKGPELL	9		0.0131	Canonical	CSNK2A1	ENSG00000101266.19	protein_coding	Y
	0.01	1.98	RYFKGPELL	9		0.0131	Canonical	CSNK2A3	ENSG00000254598.2	protein_coding	Y
	0.01	1.98	RYFKGPELL	9		0.0131	Canonical	CSNK2A2	ENSG00000070770.9	protein_coding	Y
	0.01	3	KYIEGVSDF	9		0.0084	Canonical	IPP	ENSG00000197429.10	protein_coding	Y
	0.01	2.34	TYSKKHFRI	9		0.0457	Canonical	CHEK2	ENSG00000183765.22	protein_coding	Y
	0.01	1.8	RYPDRITLI	9		0.0096	Canonical	PPP4C	ENSG00000149923.14	protein_coding	Y
	0.01	1.71	QYASAFHFL	9		0.0114	Canonical	BBS4	ENSG00000140463.14	protein_coding	Y
	0.01	1.81	LYIVHPTMF	9		0.0077	Canonical	ARHGAP1	ENSG00000175220.12	protein_coding	Y
	0.01	1.89	NYAQVFNKL	9		0.0155	Canonical	BZW2	ENSG00000136261.15	protein_coding	Y
	0.01	1.97	IYCPAPPQI	9		0.0249	Canonical	CD55	ENSG00000196352.15	protein_coding	Y
	0.01	2.47	RYLVISEKL	9		0.0245	Canonical	LRRC42	ENSG00000116212.15	protein_coding	Y
	0.01	1.74	TYLPTSPLL	9		0.0117	Canonical	NRDC	ENSG00000078618.21	protein_coding	Y
	0.01	1.8	RYLTGAWRL	9		0.0295	Canonical	ALG5	ENSG00000120697.9	protein_coding	Y
	0.01	1.69	VYFGDPVSL	9		0.0226	Canonical	GNPAT	ENSG00000116906.13	protein_coding	Y
	0.01	2.25	IFTDVALKF	9		0.0292	Canonical	GTF3C4	ENSG00000125484.12	protein_coding	Y
	PF		IYKPVTDFF	9		0.0021	Canonical	LRPPRC	ENSG00000138095.19	protein_coding
	0.01	2.74	TYQRWQFTL	9		0.0147	Canonical	PRPF8	ENSG00000174231.17	protein_coding	Y
	0.01	2.21	EYTRALFLL	9		0.1212	Canonical	MAU2	ENSG00000129933.21	protein_coding	Y
	0.01	1.96	KYLPEWTAW	9		0.0153	Canonical	PSEN1	ENSG00000080815.19	protein_coding	Y
	PF		RYFIAPAKF	9		0.0074	Canonical	LAMC1	ENSG00000135862.6	protein_coding
	0.05	1.53	EYIRMVAEW	9		0.0735	Canonical	ITCH	ENSG00000078747.15	protein_coding	Y
	0.01	2.45	HYKPTPLYF	9		0.0061	Canonical	SMC4	ENSG00000113810.16	protein_coding	Y
	PF		RYLPQTYVV	9		0.0381	Canonical	ITM2A	ENSG00000078596.11	protein_coding
	0.01	2.45	KYLINLETL	9		0.0241	Canonical	JAK2	ENSG00000096968.13	protein_coding	Y
	0.01	1.67	SYSMIVNNL	9		0.0447	Canonical	CACYBP	ENSG00000116161.17	protein_coding	Y
	0.01	2.2	RYLPDTLLL	9		0.0089	Canonical	COMT	ENSG00000093010.13	protein_coding	Y
	0.01	1.64	IYTFPHSAF	9		0.0367	Canonical	BTN2A3P	ENSG00000124549.14	transcribed_unprocessed_pseudogene	Y
	0.01	1.72	YYLNEIQSF	9		0.0012	Canonical	SPATC1L	ENSG00000160284.15	protein_coding	Y
	0.01	1.93	RYPSLWRRL	9		0.0372	Canonical	SMARCB1	ENSG00000099956.19	protein_coding	Y
	0.01	1.77	SYTHIQYLF	9		0.0034	Canonical	SH2D3C	ENSG00000095370.20	protein_coding	Y
	0.05	1.57	PYVGGLEEF	9		0.0458	Canonical	TEP1	ENSG00000129566.13	protein_coding	Y
	0.01	2.2	PFVDHVFTF	9		0.0273	Canonical	BRIX1	ENSG00000113460.12	protein_coding	Y
	0.01	2.52	KYFEVPSVL	9		0.0197	Canonical	ACTR10	ENSG00000131966.14	protein_coding	Y
	0.01	2.53	KYQNVKHNL	9		0.0277	Canonical	ZMYM1	ENSG00000197056.11	protein_coding	Y
	PF	1.23	VYNENLVHM	9		0.0215	Canonical	BCAS2	ENSG00000116752.6	protein_coding
	PF	1.23	VYNENLVHM	9		0.0215	Canonical	BCAS2P2	ENSG00000234332.1	processed_pseudogene
	PF	1.23	VYNENLVHM	9		0.0215	Canonical	BCAS2P3	ENSG00000226670.1	processed_pseudogene
	0.01	2.27	PYFNAPVYL	9		0.0704	Canonical	GAR1	ENSG00000109534.17	protein_coding	Y
	0.01	1.74	SYLSRLQYF	9		0.0019	Canonical	IQGAP2	ENSG00000145703.16	protein_coding	Y
	0.01	2.43	SYNRGDSTF	9		0.0583	Canonical	FGA	ENSG00000171560.16	protein_coding	Y
	0.05	1.99	RYNHITATY	9		0.1659	Canonical	SNRK	ENSG00000163788.14	protein_coding	Y
	0.01	2.37	VYVQNVVKL	9		0.009	Canonical	AP3D1	ENSG00000065000.18	protein_coding	Y
	0.01	2.23	IYHPDIQLL	9		0.0042	Canonical	VPS13C	ENSG00000129003.18	protein_coding	Y
	0.01	2.37	KYFEKQFEL	9		0.0085	Canonical	TATDN1	ENSG00000147687.19	protein_coding	Y
	0.01	1.79	YYITTRAQF	9		0.0104	Canonical	YES1	ENSG00000176105.14	protein_coding	Y
	0.01	1.79	YYITTRAQF	9		0.0104	Canonical	FYN	ENSG00000010810.17	protein_coding	Y
	0.01	1.54	RYLNKSFVL	9		0.0387	Canonical	ANKEF1	ENSG00000132623.16	protein_coding	Y
	0.01	1.37	KYKGIFNGF	9		0.0189	Canonical	SLC25A3	ENSG00000075415.12	protein_coding	N
	PF		RYGDLVDYL	9		0.0793	Canonical	PDGFRB	ENSG00000113721.14	protein_coding
	0.05	1.65	VYTKVSAYL	9		0.0202	Canonical	TMPRSS4	ENSG00000137648.17	protein_coding	Y
	0.01	1.62	SYMGHFDLL	9	1xOxidation [M3]	0.0249	Canonical	SF3B5	ENSG00000169976.6	protein_coding	Y
	0.05	1.64	IYIGGQEHF	9		0.0032	Canonical	XDH	ENSG00000158125.10	protein_coding	Y
	0.05	1.78	KYGIVQEFF	9		0.01	Canonical	SOGA1	ENSG00000149639.15	protein_coding	Y
	0.01	1.55	TYVYFTNEL	9		0.1471	Canonical	TNFSF10	ENSG00000121858.11	protein_coding	Y
	0.01	1.63	IYLPEVRKI	9		0.0088	Canonical	TULP4	ENSG00000130338.13	protein_coding	Y
	0.01	2.33	KYLATLETL	9		0.0184	Canonical	JAK1	ENSG00000162434.12	protein_coding	Y
	0.01	1.53	EYAKIHDLL	9		0.0707	Canonical	ZNF318	ENSG00000171467.16	protein_coding	Y
	0.01	1.69	PYNDYFEYF	9		0.0164	Canonical	HDAC2	ENSG00000196591.12	protein_coding	Y
	0.01	1.69	PYNDYFEYF	9		0.0164	Canonical	HDAC1	ENSG00000116478.12	protein_coding	Y
	0.01	1.6	TYVTILPEL	9		0.0421	Canonical	XRN1	ENSG00000114127.10	protein_coding	Y
	PF		IGLHVFPTF	9		0.6306	Canonical	TMCO3	ENSG00000150403.18	protein_coding
	0.05	1.35	VYPERTPLL	9		0.0116	Canonical	AL669918.1	ENSG00000250264.1	protein_coding	Y
	0.05	1.35	VYPERTPLL	9		0.0116	Canonical	HLA-DOB	ENSG00000241106.8	protein_coding	Y
	0.01	1.65	VYPSSLSKI	9		0.0335	Canonical	CAND1	ENSG00000111530.13	protein_coding	Y
	0.05	1.58	NFTNVAATF	9		0.1559	Canonical	ACLY	ENSG00000131473.17	protein_coding	Y
	0.01	2.3	RYISQTQGL	9		0.063	Canonical	HIPK3	ENSG00000110422.12	protein_coding	Y
	0.01	2.3	RYISQTQGL	9		0.063	Canonical	HIPK1	ENSG00000163349.22	protein_coding	Y
	0.01	2.3	RYISQTQGL	9		0.063	Canonical	HIPK2	ENSG00000064393.16	protein_coding	Y
	0.01	1.55	TWTEVSYTF	9		0.0128	Canonical	FBXO6	ENSG00000116663.11	protein_coding	Y
	0.01	2.27	VYYPVRHHL	9		0.006	Canonical	TRRAP	ENSG00000196367.13	protein_coding	Y
	0.01	1.8	FYHEAVVLF	9		0.0045	Canonical	TTC31	ENSG00000115282.19	protein_coding	Y
	0.01	2.32	VYVAGAPRF	9		0.0061	Canonical	ITGA11	ENSG00000137809.17	protein_coding	Y
	0.01	2.04	ILGPPPPSF	9		0.1561	Canonical	MATR3	ENSG00000280987.4	protein_coding	Y
	0.01	2.04	ILGPPPPSF	9		0.1561	Canonical	MATR3	ENSG00000015479.18	protein_coding	Y
	0.01	1.38	KYALLLQEL	9		0.022	Canonical	PLEKHG4	ENSG00000196155.13	protein_coding	Y
	0.01	1.73	TYLPQTYII	9		0.0098	Canonical	ITM2C	ENSG00000135916.16	protein_coding	Y
	0.05	1.28	TYLDNGVVF	9		0.0092	Canonical	DDB1	ENSG00000167986.13	protein_coding	Y
	0.01	2.42	RYLSKATTL	9		0.0156	Canonical	CDC16	ENSG00000130177.16	protein_coding	Y
	0.01	2.18	PYLFHVVTF	9		0.0114	Canonical	NF1	ENSG00000196712.17	protein_coding	Y
	0.05	1.26	PYMANVYLI	9		0.0792	Canonical	PLOD2	ENSG00000152952.12	protein_coding	Y
	0.01	2.19	EYQKVWNLF	9		0.0097	Canonical	PARP12	ENSG00000059378.12	protein_coding	Y
	0.05	1.54	AYGGAFYAF	9		0.0118	Canonical	L3HYPDH	ENSG00000126790.12	protein_coding	Y
	0.05	1.54	AYGGAFYAF	9		0.0118	Canonical	AL121694.1	ENSG00000258782.3	lncRNA	Y
	0.01	2.14	TYNQKHSLF	9		0.0188	Canonical	MID1IP1	ENSG00000165175.15	protein_coding	Y
	0.01	1.63	NYAAALETF	9		0.0076	Canonical	SUGT1	ENSG00000165416.14	protein_coding	Y
	0.01	1.63	NYAAALETF	9		0.0076	Canonical	SUGT1P1	ENSG00000226823.1	unprocessed_pseudogene	Y
	PF		KYVESFRRF	9		0.0038	Canonical	HNMT	ENSG00000150540.14	protein_coding
	0.05	2.04	NYIKDLNIL	9		0.1213	Canonical	CTDSPL2	ENSG00000137770.14	protein_coding	Y
	0.01	1.45	GYPLWKVTF	9		0.0251	Canonical	PNP	ENSG00000198805.11	protein_coding	Y
	0.01	1.64	QYLPSPPLL	9		0.0094	Canonical	KCNJ5	ENSG00000120457.12	protein_coding	Y
	0.01	2.4	TYDNVHQQF	9		0.005	Canonical	ARHGAP24	ENSG00000138639.18	protein_coding	Y
	0.01	1.71	IYTKLNQKI	9		0.0165	Canonical	EXOC6	ENSG00000138190.16	protein_coding	Y
	PF		QFVPKSHLF	9		0.013	Canonical	WDR3	ENSG00000065183.16	protein_coding
	0.01	2.03	IYNQVNVVL	9		0.0397	Canonical	FAM49B	ENSG00000153310.19	protein_coding	Y
	0.05	1.57	VYSQFITQL	9		0.0076	Canonical	RAD50	ENSG00000113522.14	protein_coding	Y
	0.05	1.57	VYSQFITQL	9		0.0076	Canonical	AC116366.3	ENSG00000283782.2	protein_coding	Y
	0.01	2.34	KYPLLLQSI	9		0.0152	Canonical	ARHGEF1	ENSG00000076928.17	protein_coding	Y
	PF		LYSHLVDYF	9		0.0206	Canonical	GNA11	ENSG00000088256.9	protein_coding
	PF		LYIVEPLKF	9		0.0043	Canonical	SUCO	ENSG00000094975.14	protein_coding
	0.01	2.3	RYVIIPTTF	9		0.003	Canonical	CAPN5	ENSG00000149260.18	protein_coding	Y
	0.05	1.81	VYSGGVYLF	9		0.0017	Canonical	TMEM161A	ENSG00000064545.14	protein_coding	Y
	0.01	1.65	GYFGNPQKF	9		0.0101	Canonical	LAMA3	ENSG00000053747.16	protein_coding	Y
	0.01	2.01	EYVKQTWNL	9		0.0564	Canonical	SYK	ENSG00000165025.15	protein_coding	Y
	0.01	1.75	VFDPKVFTF	9		0.0044	Canonical	CRYBG1	ENSG00000112297.15	protein_coding	Y
	0.01	2.07	VYQEVQAMF	9		0.0026	Canonical	FAM98B	ENSG00000171262.11	protein_coding	Y
	0.05	1.95	GYIHVTQTF	9		0.0052	Canonical	NKG7	ENSG00000105374.10	protein_coding	Y
	0.05	1.49	PYPQYFTQL	9		0.0753	Canonical	HSDL1	ENSG00000103160.12	protein_coding	Y
	0.01	1.9	NYIKSLSSF	9		0.0063	Canonical	SMG1	ENSG00000157106.16	protein_coding	Y
	0.01	2.52	KYVDKLEKI	9		0.0162	Canonical	USP5	ENSG00000111667.13	protein_coding	Y
	0.01	1.9	NYIKSLSSF	9		0.0063	Canonical	SMG1P4	ENSG00000185710.9	transcribed_unprocessed_pseudogene	Y
	0.01	1.9	NYIKSLSSF	9		0.0063	Canonical	SMG1P1	ENSG00000237296.9	transcribed_unprocessed_pseudogene	Y
	0.01	1.9	NYIKSLSSF	9		0.0063	Canonical	SMG1P6	ENSG00000254634.4	unprocessed_pseudogene	Y
	0.01	1.9	NYIKSLSSF	9		0.0063	Canonical	SMG1P3	ENSG00000180747.15	transcribed_unprocessed_pseudogene	Y
	0.01	1.9	NYIKSLSSF	9		0.0063	Canonical	NPIPB5	ENSG00000243716.10	protein_coding	Y
	0.01	1.9	NYIKSLSSF	9		0.0063	Canonical	SMG1P5	ENSG00000183604.14	transcribed_unprocessed_pseudogene	Y
	0.01	1.9	NYIKSLSSF	9		0.0063	Canonical	SMG1P2	ENSG00000205534.6	unprocessed_pseudogene	Y
	0.05	1.38	IYNGETLVF	9		0.0103	Canonical	PCYOX1	ENSG00000116005.12	protein_coding	Y
	0.01	2.41	SYRNSLDSF	9		0.0706	Canonical	ZNF326	ENSG00000162664.17	protein_coding	Y
	0.05	1.42	AYGLVSATF	9		0.0084	Canonical	AC118553.2	ENSG00000283761.1	protein_coding	Y
	0.05	1.42	AYGLVSATF	9		0.0084	Canonical	MFSD14A	ENSG00000156875.14	protein_coding	Y
	0.01	1.44	KYFAKHPRL	9		0.0419	Canonical	UTRN	ENSG00000152818.18	protein_coding	Y
	0.01	2.52	RYVMTTTTL	9		0.0481	Canonical	EIF2S1	ENSG00000134001.13	protein_coding	Y
	0.01	2.14	AYINRASLL	9		0.129	Canonical	COPS4	ENSG00000138663.9	protein_coding	Y
	0.01	1.96	GYLADPAKF	9		0.0469	Canonical	MRPL15	ENSG00000137547.8	protein_coding	Y
	0.01	2.48	QYAVLLNRF	9		0.014	Canonical	NSUN3	ENSG00000178694.10	protein_coding	Y
	0.01	2.11	RFVNVVPTF	9		0.0169	Canonical	FAUP1	ENSG00000235297.3	processed_pseudogene	Y
	0.01	2.11	RFVNVVPTF	9		0.0169	Canonical	FAU	ENSG00000149806.11	protein_coding	Y
	PF		PFAPAIQTF	9		0.0138	Canonical	UBA7	ENSG00000182179.13	protein_coding
	PF		MYLKTVDKF	9		0.0047	Canonical	TRAPPC2	ENSG00000196459.14	protein_coding
	0.05	1.86	KYPDAVATW	9		0.004	Canonical	SPP1	ENSG00000118785.14	protein_coding	Y
	PF		MYLKTVDKF	9		0.0047	Canonical	TRAPPC2B	ENSG00000256060.2	protein_coding
	0.05	1.54	RLPSETYFF	9		0.0718	Canonical	ZBED6	ENSG00000257315.2	protein_coding	Y
	0.05	1.54	RLPSETYFF	9		0.0718	Canonical	ZC3H11A	ENSG00000058673.16	protein_coding	Y
	0.01	1.8	NYAQVLDKF	9		0.0106	Canonical	ASAP1	ENSG00000153317.15	protein_coding	Y
	0.05	1.14	YWEVQPATF	9		0.1056	Canonical	BGN	ENSG00000182492.16	protein_coding	Y
	0.01	2.44	RLPEEWSQW	9		0.2417	Canonical	HSPB1	ENSG00000106211.9	protein_coding	Y
	0.01	2.36	NYIGLINRI	9		0.0643	Canonical	EIF2AK2	ENSG00000055332.18	protein_coding	Y
	0.01	2.47	VYFSAIQKI	9		0.0053	Canonical	BAIAP2L2	ENSG00000128298.17	protein_coding	Y
	PF		VLPQEYFRF	9		0.0461	Canonical	PCDH20	ENSG00000280165.1	protein_coding
	PF		VLPQEYFRF	9		0.0461	Canonical	AL592490.1	ENSG00000197991.11	protein_coding
	0.01	2.04	VYKTIMEQF	9	1xOxidation [M6]	0.0044	Canonical	BAIAP2	ENSG00000175866.15	protein_coding	Y
	PF		RLPEPLPSW	9		0.1216	Canonical	LRIG3	ENSG00000139263.11	protein_coding
	PF		TYNYPVHYF	9		0.0036	Canonical	TMEM30A	ENSG00000112697.16	protein_coding
	0.01	1.47	TYPDVNNSI	9		0.0693	Canonical	VPS26A	ENSG00000122958.15	protein_coding	Y
	PF		TYARLAQLL	9		0.0225	Canonical	USP19	ENSG00000172046.19	protein_coding
	PF		TYVTEVREL	9		0.101	Canonical	KTN1	ENSG00000126777.18	protein_coding
	0.01	2.15	VFIRGGEEF	9		0.0509	Canonical	AC124319.1	ENSG00000173821.19	protein_coding	Y
	PF		YYLTDIDRI	9		0.1248	Canonical	GNA14	ENSG00000156049.7	protein_coding
	0.01	2.01	YYTPITPHL	9		0.0056	Canonical	PTBP3	ENSG00000119314.15	protein_coding	Y
	0.01	1.73	VYIHRTDRL	9		0.0419	Canonical	AHI1	ENSG00000135541.21	protein_coding	Y
	0.01	1.66	TYPAELNNI	9		0.087	Canonical	AHR	ENSG00000106546.14	protein_coding	Y
	PF		RYAEQISVL	9		0.0439	Canonical	CCDC121	ENSG00000176714.9	protein_coding
	0.01	2.31	RYGLVTNEI	9		0.088	Canonical	IFIH1	ENSG00000115267.8	protein_coding	Y
	PF		RYGSPINTF	9		0.0015	Canonical	C6orf132	ENSG00000188112.9	protein_coding
	PF		RYQKLIVQI	9		0.0148	Canonical	AC004593.3	ENSG00000285162.1	protein_coding
	PF		RYQKLIVQI	9		0.0148	Canonical	CHN2	ENSG00000106069.22	protein_coding
	0.01	1.71	VYTSVVEEL	9		0.0156	Canonical	MAN2B2	ENSG00000013288.8	protein_coding	Y
	0.01	1.84	KYGNFIDKL	9		0.0629	Canonical	GTPBP10	ENSG00000105793.15	protein_coding	Y
	0.01	2.44	KYLTQHERI	9		0.0572	Canonical	ZNF473	ENSG00000142528.16	protein_coding	Y
	PF		KYGVYEAIF	9		0.0827	Canonical	PPARA	ENSG00000186951.16	protein_coding
	0.01	1.46	KQPEDYFYL	9		0.3506	Canonical	MYO9B	ENSG00000099331.13	protein_coding	Y
	0.01	2.57	AYDTVRWEF	9		0.0198	Canonical	DPP7	ENSG00000176978.14	protein_coding	Y
	0.01	1.75	AYGKDFHLI	9		0.0193	Canonical	MIER1	ENSG00000198160.14	protein_coding	Y
	PF		KYHQVDVRF	9		0.0091	Canonical	PPP1R36	ENSG00000165807.8	protein_coding
	0.01	2.12	LYDIVFKHF	9		0.0163	Canonical	SP100	ENSG00000067066.17	protein_coding	Y
	PF		KYLADLPTL	9		0.0259	Canonical	CEP85L	ENSG00000111860.14	protein_coding
	PF		LYFESVRTF	9		0.0046	Canonical	TMBIM4	ENSG00000155957.17	protein_coding
	PF		LYFESVRTF	9		0.0046	Canonical	AC078927.1	ENSG00000228144.2	protein_coding
	0.01	2.27	KYVENFGLI	9		0.1176	Canonical	SPCS2	ENSG00000118363.12	protein_coding	Y
	0.01	2.27	KYVENFGLI	9		0.1176	Canonical	SPCS2P4	ENSG00000228589.3	processed_pseudogene	Y
	0.01	2.06	KYMSVIAEL	9		0.0096	Canonical	ATPAF1	ENSG00000123472.12	protein_coding	Y
	0.01	2.37	IYSQTYFRF	9		0.0017	Canonical	TNFSF10	ENSG00000121858.11	protein_coding	Y
	PF		LYLKEVTKF	9		0.0028	Canonical	RRAGD	ENSG00000025039.14	protein_coding
	0.01	2.4	RYKTGKNKW	9		0.2514	Canonical	RPL27	ENSG00000131469.14	protein_coding	Y
	0.01	2.4	RYKTGKNKW	9		0.2514	Canonical	AL049830.1	ENSG00000213867.4	processed_pseudogene	Y
	PF		LYLKEVTKF	9		0.0028	Canonical	RRAGC	ENSG00000116954.8	protein_coding
	PF		LYLKEVTKF	9		0.0028	Canonical	AL139260.2	ENSG00000273637.1	lncRNA
	PF		RYMPDICVI	9		0.1365	Canonical	USP9X	ENSG00000124486.13	protein_coding
	PF		RYMPDICVI	9		0.1365	Canonical	USP9Y	ENSG00000114374.13	protein_coding
	0.01	2.62	IYKGIPLQL	9		0.0108	Canonical	USP6NL	ENSG00000148429.14	protein_coding	Y
	0.01	1.7	KYSPFVVSF	9		0.001	Canonical	ITPKC	ENSG00000086544.3	protein_coding	Y
	0.01	2.09	IYQWVRDEL	9		0.1162	Canonical	SATB1	ENSG00000182568.17	protein_coding	Y
	0.01	3.44	KYWDVPPPGF	10		0.0667	Canonical	U2AF2	ENSG00000063244.12	protein_coding	Y
	0.01	3.41	KYADLSHNRL	10		0.1141	Canonical	RARS	ENSG00000113643.9	protein_coding	Y
	0.01	1.57	AYSYVPPHW	9		0.0163	Canonical	FAM168A	ENSG00000054965.10	protein_coding	Y
	0.01	3.75	RYPNSHTHYF	10		0.0082	Canonical	CNOT1	ENSG00000125107.18	protein_coding	Y
	0.01	2.12	VYNENLVHMI	10		0.1866	Canonical	BCAS2	ENSG00000116752.6	protein_coding	Y
	0.01	2.12	VYNENLVHMI	10		0.1866	Canonical	BCAS2P2	ENSG00000234332.1	processed_pseudogene	Y
	0.05	1.89	EYIRALQRL	9		0.047	Canonical	ASCL2	ENSG00000183734.4	protein_coding	Y
	0.01	2.12	VYNENLVHMI	10		0.1866	Canonical	BCAS2P3	ENSG00000226670.1	processed_pseudogene	Y
	0.01	2.64	RYAVVLNATW	10		0.1685	Canonical	SCD	ENSG00000099194.6	protein_coding	Y
	0.01	2.64	RYAVVLNATW	10		0.1685	Canonical	SCDP1	ENSG00000226549.3	processed_pseudogene	Y
	0.01	2.93	KYLSVQGQLF	10		0.0111	Canonical	MTCH1	ENSG00000137409.19	protein_coding	Y
	0.01	2.93	KYLSVQGQLF	10		0.0111	Canonical	AC112694.1	ENSG00000256282.1	transcribed_processed_pseudogene	Y
	PF		IYFKKPLNI	9		0.0076	Canonical	ATP6V0A1	ENSG00000033627.16	protein_coding
	0.01	2.14	EYPDRIMNTF	10		0.0342	Canonical	AC092143.1	ENSG00000198211.8	protein_coding	N
	0.01	2.14	EYPDRIMNTF	10		0.0342	Canonical	TUBB3	ENSG00000258947.7	protein_coding	N
	0.01	2.14	EYPDRIMNTF	10		0.0342	Canonical	TUBB2B	ENSG00000137285.10	protein_coding	N
	0.01	2.14	EYPDRIMNTF	10		0.0342	Canonical	TUBB2A	ENSG00000137267.6	protein_coding	N
	0.01	2.45	LYSRVQATF	9		0.006	Canonical	FBXO31	ENSG00000103264.18	protein_coding	Y
	0.01	2.14	EYPDRIMNTF	10		0.0342	Canonical	TUBB4B	ENSG00000188229.6	protein_coding	N
	0.01	2.14	EYPDRIMNTF	10		0.0342	Canonical	TUBB	ENSG00000196230.13	protein_coding	N
	0.01	2.14	EYPDRIMNTF	10		0.0342	Canonical	TUBBP1	ENSG00000127589.4	transcribed_processed_pseudogene	N
	0.01	2.98	VYAHIYHQHF	10		0.0094	Canonical	MOB1A	ENSG00000114978.18	protein_coding	Y
	0.01	2.98	VYAHIYHQHF	10		0.0094	Canonical	MOB1B	ENSG00000173542.8	protein_coding	Y
	0.01	2.53	RYFDPANGKF	10		0.0204	Canonical	EEF2	ENSG00000167658.16	protein_coding	Y
	0.01	2.86	RYMPPAHRNF	10		0.0038	Canonical	IDO1	ENSG00000131203.13	protein_coding	Y
	0.01	1.92	RYPPDIRATF	10		0.007	Canonical	SBF1	ENSG00000100241.21	protein_coding	Y
	0.01	2.07	FYLEGGFSKF	10		0.017	Canonical	DUSP6	ENSG00000139318.8	protein_coding	Y
	0.01	1.93	VWSDVTPLRF	10		0.0439	Canonical	MMP2	ENSG00000087245.13	protein_coding	Y
	0.01	2.62	RFIRPMGLRF	10		0.1263	Canonical	NSA2	ENSG00000164346.10	protein_coding	Y
	0.01	2.62	RFIRPMGLRF	10		0.1263	Canonical	AC092868.3	ENSG00000259750.1	processed_pseudogene	Y
	0.01	2.62	RFIRPMGLRF	10		0.1263	Canonical	AC092641.1	ENSG00000227176.1	processed_pseudogene	Y
	0.01	2.72	KYLDVKFEYL	10		0.0842	Canonical	PICK1	ENSG00000100151.16	protein_coding	Y
	0.01	2.08	VWSDVTPLTF	10		0.0172	Canonical	MMP11	ENSG00000099953.10	protein_coding	Y
	0.01	2.84	KYITDWQNVF	10		0.0188	Canonical	AC021087.5	ENSG00000286001.1	protein_coding	Y
	0.01	2.84	KYITDWQNVF	10		0.0188	Canonical	PDCD6	ENSG00000249915.8	protein_coding	Y
	0.01	2.76	RFLDDLGLKF	10		0.1174	Canonical	DSG2	ENSG00000046604.13	protein_coding	Y
	0.01	2.31	LYADVGGKQF	10		0.1052	Canonical	SSR4	ENSG00000180879.13	protein_coding	Y
	0.01	2.19	IYISTLKTEF	10		0.0186	Canonical	AHSA1	ENSG00000100591.8	protein_coding	Y
	PF		IYPELQIERF	10		0.0064	Canonical	APBB1IP	ENSG00000077420.16	protein_coding
	0.01	2.14	TYPQLEGFKF	10		0.0192	Canonical	WDFY4	ENSG00000128815.19	protein_coding	Y
	0.01	1.27	IFIDPGYQTF	10		0.0116	Canonical	ZMYM2	ENSG00000121741.16	protein_coding	Y
	0.01	3.4	IYHKLKHFKF	10		0.1053	Canonical	CCDC82	ENSG00000149231.14	protein_coding	Y
	0.01	1.98	TYMGHTGAVW	10		0.1912	Canonical	EIF3I	ENSG00000084623.11	protein_coding	Y
	0.01	2.33	RYAILTKATW	10		0.1806	Canonical	MYO1E	ENSG00000157483.8	protein_coding	Y
	0.01	2.21	KFIDPIYQVW	10		0.1147	Canonical	RRN3	ENSG00000085721.12	protein_coding	Y
	0.01	2.21	KFIDPIYQVW	10		0.1147	Canonical	RRN3P2	ENSG00000103472.10	lncRNA	Y
	0.01	2.21	KFIDPIYQVW	10		0.1147	Canonical	AC009093.9	ENSG00000284671.1	transcribed_unprocessed_pseudogene	Y
	0.01	1.87	VWNPRSHEKL	10		0.4646	Canonical	WDR6	ENSG00000178252.18	protein_coding	Y
	PF		RYLPTGSFPF	10		0.0212	Canonical	TUSC3	ENSG00000104723.20	protein_coding
	0.01	1.81	TQPGTGWVQF	10		0.5996	Canonical	NECAP2	ENSG00000157191.20	protein_coding	Y
	0.01	1.81	YYITGNLETF	10		0.0099	Canonical	SEL1L3	ENSG00000091490.11	protein_coding	Y
	0.01	2.53	AWAPKPYHKF	10		0.0298	Canonical	TNIK	ENSG00000154310.17	protein_coding	Y
	0.01	2.53	AWAPKPYHKF	10		0.0298	Canonical	MINK1	ENSG00000141503.17	protein_coding	Y
	0.01	2.53	AWAPKPYHKF	10		0.0298	Canonical	MAP4K4	ENSG00000071054.16	protein_coding	Y
	0.01	2	KWNPTAGVAF	10		0.1716	Canonical	POLR2C	ENSG00000102978.13	protein_coding	Y
	PF		VYQKIHNEKF	10		0.0173	Canonical	ZNF529	ENSG00000186020.13	protein_coding
	0.01	3.05	KYITQGQLLQF	11		0.0207	Canonical	ELOVL5	ENSG00000012660.14	protein_coding	Y
	0.01	3.2	KYMEVHEKASF	11		0.0179	Canonical	PTPN23	ENSG00000076201.15	protein_coding	Y
	0.01	3.29	IYDTSTDRLLW	11		0.2183	Canonical	ISG20	ENSG00000172183.15	protein_coding	Y
	0.01	2.85	VYVDLGGSHVF	11		0.0159	Canonical	BMS1	ENSG00000165733.8	protein_coding	Y
	PF		FYLPKDAVKHL	11		0.2776	Canonical	RASSF1	ENSG00000068028.17	protein_coding
	0.01	2.49	KYIENLDNITF	11		0.0115	Canonical	ZFYVE16	ENSG00000039319.17	protein_coding	Y
	0.01	2.35	HYNSDLNNLLF	11		0.1021	Canonical	RHOBTB3	ENSG00000164292.13	protein_coding	Y
	0.01	1.87	TVQPGQNFHMF	11		1.085	Canonical	PSMA5	ENSG00000143106.13	protein_coding	Y
	0.01	2.25	RWFTHASPTL	10		0.4731	Canonical	RRM1	ENSG00000167325.15	protein_coding	Y
	0.01	2.29	KYPGHLAAITL	11		0.1374	Canonical	ACTR5	ENSG00000101442.10	protein_coding	N
	0.01	2.78	RFLNDPGHLLW	11		0.1682	Canonical	TRIM39-RPP21	ENSG00000248167.7	protein_coding	Y
	0.01	2.78	RFLNDPGHLLW	11		0.1682	Canonical	RPP21	ENSG00000241370.5	protein_coding	Y
	0.01	2.57	EYMLEKSFYQF	11		0.1307	Canonical	MTREX	ENSG00000039123.16	protein_coding	Y
	0.05	1.39	VYNANINLF	9		0.0019	Canonical	PKD2	ENSG00000118762.8	protein_coding	Y
	0.05	1.39	VYNANINLF	9		0.0019	Canonical	PKD2L1	ENSG00000107593.17	protein_coding	Y
	0.01	2.36	RYPDTIALTF	10		0.0035	Canonical	MAPKBP1	ENSG00000137802.14	protein_coding	Y
	0.01	3.03	SGPYGGGGQYF	11		0.1553	Canonical	HNRNPA1	ENSG00000135486.17	protein_coding	Y
	0.01	3.03	SGPYGGGGQYF	11		0.1553	Canonical	HNRNPA1L2	ENSG00000139675.12	protein_coding	Y
	0.01	2.43	TWFNQPARKI	10		1.3634	Canonical	RPL13	ENSG00000167526.13	protein_coding	Y
	0.01	2.43	TWFNQPARKI	10		1.3634	Canonical	RPL13P12	ENSG00000215030.5	processed_pseudogene	Y
	0.01	3.03	SGPYGGGGQYF	11		0.1553	Canonical	HNRNPA1P7	ENSG00000215492.6	processed_pseudogene	Y
	0.01	3.03	SGPYGGGGQYF	11		0.1553	Canonical	HNRNPA1P10	ENSG00000214223.4	processed_pseudogene	Y
	0.01	3.03	SGPYGGGGQYF	11		0.1553	Canonical	HNRNPA1P35	ENSG00000225695.1	processed_pseudogene	Y
	0.01	2.13	TYNKHINISF	10		0.0497	Canonical	THAP2	ENSG00000173451.7	protein_coding	Y
	0.01	3.03	SGPYGGGGQYF	11		0.1553	Canonical	HNRNPA1P12	ENSG00000220157.4	processed_pseudogene	Y
	0.01	2.86	TYSPALNKMF	10	1xOxidation [M9]	0.0184	Canonical	TP53	ENSG00000141510.17	protein_coding	Y
	0.01	3.03	SGPYGGGGQYF	11		0.1553	Canonical	HNRNPA1P43	ENSG00000214204.4	processed_pseudogene	Y
	0.01	3.03	SGPYGGGGQYF	11		0.1553	Canonical	HNRNPA1P63	ENSG00000227453.1	processed_pseudogene	Y
	0.01	3.03	SGPYGGGGQYF	11		0.1553	Canonical	HNRNPA1P44	ENSG00000249271.2	processed_pseudogene	Y
	0.01	3.03	SGPYGGGGQYF	11		0.1553	Canonical	HNRNPA1P21	ENSG00000228168.1	processed_pseudogene	Y
	0.01	3.03	SGPYGGGGQYF	11		0.1553	Canonical	HNRNPA1P5	ENSG00000259512.3	processed_pseudogene	Y
	0.01	3.03	SGPYGGGGQYF	11		0.1553	Canonical	HNRNPA1P58	ENSG00000219582.3	processed_pseudogene	Y
	0.01	3.03	SGPYGGGGQYF	11		0.1553	Canonical	HNRNPA1P22	ENSG00000236459.1	processed_pseudogene	Y
	0.01	3.03	SGPYGGGGQYF	11		0.1553	Canonical	HNRNPA1P40	ENSG00000212961.4	processed_pseudogene	Y
	0.01	3.03	SGPYGGGGQYF	11		0.1553	Canonical	HNRNPA1P6	ENSG00000229887.4	transcribed_unprocessed_pseudogene	Y
	0.01	3.03	SGPYGGGGQYF	11		0.1553	Canonical	HNRNPA1P57	ENSG00000237442.3	transcribed_processed_pseudogene	Y
	0.05	1.32	MYPPAFRF	8		0.044	Canonical	TBXAS1	ENSG00000059377.17	protein_coding	Y
	0.01	2.1	KYGPVFTI	8		0.162	Canonical	CYP2S1	ENSG00000167600.14	protein_coding	Y
	0.01	1.92	RYGNVSHF	8		0.1486	Canonical	SUV39H2	ENSG00000152455.15	protein_coding	Y
	PF	1.42	YLANFYIF	8		0.8081	Canonical	C16orf89	ENSG00000153446.15	protein_coding
	PF	1.42	YLANFYIF	8		0.8081	Canonical	ABCC6	ENSG00000091262.15	protein_coding
	0.05	2.01	YGGGGQYF	8		1.2905	Canonical	HNRNPA1	ENSG00000135486.17	protein_coding	Y
	0.05	2.01	YGGGGQYF	8		1.2905	Canonical	HNRNPA1L2	ENSG00000139675.12	protein_coding	Y
	0.05	2.01	YGGGGQYF	8		1.2905	Canonical	HNRNPA1P7	ENSG00000215492.6	processed_pseudogene	Y
	0.05	2.01	YGGGGQYF	8		1.2905	Canonical	HNRNPA1P10	ENSG00000214223.4	processed_pseudogene	Y
	0.05	2.01	YGGGGQYF	8		1.2905	Canonical	HNRNPA1P60	ENSG00000233497.4	processed_pseudogene	Y
	0.05	2.01	YGGGGQYF	8		1.2905	Canonical	HNRNPA1P35	ENSG00000225695.1	processed_pseudogene	Y
	0.05	2.01	YGGGGQYF	8		1.2905	Canonical	HNRNPA1P70	ENSG00000236946.2	processed_pseudogene	Y
	0.05	2.01	YGGGGQYF	8		1.2905	Canonical	HNRNPA1P12	ENSG00000220157.4	processed_pseudogene	Y
	0.05	2.01	YGGGGQYF	8		1.2905	Canonical	HNRNPA1P43	ENSG00000214204.4	processed_pseudogene	Y
	0.05	2.01	YGGGGQYF	8		1.2905	Canonical	HNRNPA1P3	ENSG00000226188.2	processed_pseudogene	Y
	0.05	2.01	YGGGGQYF	8		1.2905	Canonical	HNRNPA1P63	ENSG00000227453.1	processed_pseudogene	Y
	0.05	2.01	YGGGGQYF	8		1.2905	Canonical	HNRNPA1P44	ENSG00000249271.2	processed_pseudogene	Y
	0.05	2.01	YGGGGQYF	8		1.2905	Canonical	HNRNPA1P21	ENSG00000228168.1	processed_pseudogene	Y
	0.05	2.01	YGGGGQYF	8		1.2905	Canonical	HNRNPA1P2	ENSG00000237285.1	processed_pseudogene	Y
	0.05	2.01	YGGGGQYF	8		1.2905	Canonical	HNRNPA1P5	ENSG00000259512.3	processed_pseudogene	Y
	0.05	2.01	YGGGGQYF	8		1.2905	Canonical	HNRNPA1P58	ENSG00000219582.3	processed_pseudogene	Y
	0.05	2.01	YGGGGQYF	8		1.2905	Canonical	HNRNPA1P38	ENSG00000253605.1	processed_pseudogene	Y
	0.05	2.01	YGGGGQYF	8		1.2905	Canonical	HNRNPA1P22	ENSG00000236459.1	processed_pseudogene	Y
	0.05	2.01	YGGGGQYF	8		1.2905	Canonical	HNRNPA1P40	ENSG00000212961.4	processed_pseudogene	Y
	0.05	2.01	YGGGGQYF	8		1.2905	Canonical	HNRNPA1P53	ENSG00000229534.1	processed_pseudogene	Y
	0.05	2.01	YGGGGQYF	8		1.2905	Canonical	HNRNPA1P6	ENSG00000229887.4	transcribed_unprocessed_pseudogene	Y
	0.05	2.01	YGGGGQYF	8		1.2905	Canonical	HNRNPA1P24	ENSG00000241947.1	processed_pseudogene	Y
	0.05	2.01	YGGGGQYF	8		1.2905	Canonical	HNRNPA1P57	ENSG00000237442.3	transcribed_processed_pseudogene	Y
	0.05	2.01	YGGGGQYF	8		1.2905	Canonical	HNRNPA1P50	ENSG00000257195.1	processed_pseudogene	Y
	0.01	2.54	YYEKLHTYF	9		0.013	Canonical	ITGB4	ENSG00000132470.14	protein_coding	Y
	0.01	2.67	VYAIKNHYW	9		0.0149	Canonical	TM9SF3	ENSG00000077147.16	protein_coding	Y
	0.01	2.24	RYMPQNPHI	9		0.0123	Canonical	RBBP7	ENSG00000102054.17	protein_coding	Y
	0.01	2.46	NYKSHHLQL	9		0.1273	Canonical	CWF19L1	ENSG00000095485.18	protein_coding	Y
	0.01	1.81	SYIEHIFEI	9		0.0067	Canonical	PEA15	ENSG00000162734.12	protein_coding	Y
	0.01	2.68	RYLDELMKL	9		0.0155	Canonical	IQGAP1	ENSG00000140575.13	protein_coding	Y
	0.01	1.71	VYDPLFSQL	9		0.0156	Canonical	SRRD	ENSG00000100104.13	protein_coding	Y
	0.05	1.54	EYVKFLHKF	9		0.0042	Canonical	ZNF506	ENSG00000081665.14	protein_coding	Y
	0.01	2.08	KYSSGFRNI	9		0.0549	Canonical	ATM	ENSG00000149311.18	protein_coding	Y
	0.01	1.95	DYVEGLRVF	9		0.1219	Canonical	MYL6	ENSG00000092841.18	protein_coding	Y
	0.01	2.35	RYAEWEERI	9		0.1199	Canonical	GBA2	ENSG00000070610.14	protein_coding	Y
	0.01	1.91	KYVKVLHKF	9		0.0011	Canonical	AC092161.1	ENSG00000198039.11	protein_coding	Y
	0.01	1.91	KYVKVLHKF	9		0.0011	Canonical	AC008554.1	ENSG00000237440.9	protein_coding	Y
	0.01	2.2	QYVTQINRL	9		0.0782	Canonical	PREX1	ENSG00000124126.14	protein_coding	Y
	0.01	1.48	RFEEAHFTF	9		0.0208	Canonical	PIAS3	ENSG00000131788.16	protein_coding	Y
	0.01	1.66	KYVKVMHKF	9		0.0018	Canonical	ZNF138	ENSG00000197008.9	protein_coding	Y
	0.01	1.62	YYLTHGLYL	9		0.0504	Canonical	PIGU	ENSG00000101464.10	protein_coding	Y
	0.01	1.72	VYTTTVHWL	9		0.0451	Canonical	PRPF8	ENSG00000174231.17	protein_coding	Y
	PF		IYAKHLEHW	9		0.012	Canonical	HS3ST3A1	ENSG00000153976.3	protein_coding
	PF		IYAKHLEHW	9		0.012	Canonical	HS3ST3B1	ENSG00000125430.9	protein_coding
	0.01	2.59	KYGKSFRKL	9		0.0535	Canonical	STK39	ENSG00000198648.11	protein_coding	Y
	0.01	1.4	LYPPRQPTF	9		0.002	Canonical	SIGLEC1	ENSG00000088827.12	protein_coding	Y
	PF		FYNNVKSRF	9		0.0242	Canonical	MYRIP	ENSG00000170011.14	protein_coding
	0.01	1.49	LYQEIIHYF	9		0.0013	Canonical	DOCK1	ENSG00000150760.12	protein_coding	Y
	0.01	2.02	VYPYKLYRL	9		0.0236	Canonical	ZBTB38	ENSG00000177311.11	protein_coding	Y
	0.01	1.84	HYIRKYNRF	9		0.012	Canonical	RPS11	ENSG00000142534.7	protein_coding	Y
	0.01	1.44	VYDDLKYVW	9		0.0205	Canonical	RENBP	ENSG00000102032.13	protein_coding	Y
	PF		KYIIELNHM	9		0.058	Canonical	YPEL3	ENSG00000090238.11	protein_coding
	0.01	1.93	QYPVIIHLI	9		0.0051	Canonical	ELOVL1	ENSG00000066322.15	protein_coding	Y
	0.01	1.94	AYPHNLMTF	9		0.0043	Canonical	TRAM1	ENSG00000067167.8	protein_coding	Y
	0.01	1.82	QYSPLLAAF	9		0.0099	Canonical	BZW1	ENSG00000082153.18	protein_coding	Y
	0.01	1.82	QYSPLLAAF	9		0.0099	Canonical	BZW1P2	ENSG00000198406.7	processed_pseudogene	Y
	0.01	1.85	RYDNVTILF	9		0.0094	Canonical	GUCY1B1	ENSG00000061918.13	protein_coding	Y
	PF		RYLQKIEEF	9		0.002	Canonical	KCNG1	ENSG00000026559.14	protein_coding
	0.05	1.47	HYNSHYEKF	9		0.0059	Canonical	ASTN2	ENSG00000148219.16	protein_coding	Y
	0.01	1.68	VFTEVANLF	9		0.029	Canonical	SIN3B	ENSG00000127511.9	protein_coding	Y
	0.01	1.65	QYLLDTSTW	9		0.0508	Canonical	TM4SF1	ENSG00000169908.12	protein_coding	Y
	0.01	1.87	PYYSKFILI	9		0.0733	Canonical	ORC5	ENSG00000164815.11	protein_coding	Y
	0.01	1.61	NYKKFYEQF	9		0.0082	Canonical	HSP90AA1	ENSG00000080824.18	protein_coding	Y
	0.01	1.61	NYKKFYEQF	9		0.0082	Canonical	HSP90AA6P	ENSG00000181359.5	transcribed_processed_pseudogene	Y
	0.01	1.92	PYISNIYLI	9		0.0412	Canonical	PLOD1	ENSG00000083444.17	protein_coding	Y
	0.01	2.16	HYSPIYLSF	9		0.0011	Canonical	FDFT1	ENSG00000079459.13	protein_coding	Y
	PF		RYGSDFYSM	9		0.0772	Canonical	AMZ2	ENSG00000196704.12	protein_coding
	PF		RYPKEFQKL	9		0.0071	Canonical	IDS	ENSG00000010404.18	protein_coding
	PF		RYPKEFQKL	9		0.0071	Canonical	AC244197.3	ENSG00000241489.8	protein_coding
	0.01	1.66	NYLHLDYNF	9		0.0272	Canonical	PRPF8	ENSG00000174231.17	protein_coding	Y
	PF		MYPDVFAHF	9		0.0011	Canonical	PC	ENSG00000173599.14	protein_coding
	0.01	1.08	TYLTSIPSI	9		0.0286	Canonical	MCF2L	ENSG00000126217.21	protein_coding	Y
	PF		KYAKLEEKL	9		0.0735	Canonical	GOLGB1	ENSG00000173230.15	protein_coding
	PF		WYMDNPQNL	9		0.0584	Canonical	PLEKHA2	ENSG00000169499.15	protein_coding
	PF		WYMDNPQNL	9		0.0584	Canonical	PLEKHA1	ENSG00000107679.14	protein_coding
	PF		KYGMVTYLL	9		0.0298	Canonical	GPAT4	ENSG00000158669.11	protein_coding
	0.01	2.18	NYISGIQTI	9		0.0107	Canonical	SF3B3	ENSG00000189091.13	protein_coding	Y
	PF		VYLDGIVRI	9		0.0094	Canonical	KIAA0895L	ENSG00000196123.13	protein_coding
	0.01	2.47	VYTRHMTWI	9		0.4034	Canonical	POLR1C	ENSG00000171453.20	protein_coding	Y
	0.05	1.56	SYGKINILL	9		0.038	Canonical	ASCC3	ENSG00000112249.14	protein_coding	Y
	0.01	1.8	IYHQVAVQF	9		0.0026	Canonical	ACACB	ENSG00000076555.15	protein_coding	Y
	0.01	1.8	IYHQVAVQF	9		0.0026	Canonical	ACACA	ENSG00000278540.5	protein_coding	Y
	PF		RYLQDLLAW	9		0.079	Canonical	PLEC	ENSG00000178209.15	protein_coding
	0.01	1.49	IYGYVAEQF	9		0.0049	Canonical	SPCS1	ENSG00000114902.14	protein_coding	Y
	0.01	2.25	IYQKVRHRL	9		0.0165	Canonical	STRIP1	ENSG00000143093.15	protein_coding	Y
	0.05	1.3	VFPDKGYSF	9		0.0112	Canonical	TIA1	ENSG00000116001.16	protein_coding	Y
	0.05	1.68	QYAPSTAQF	9		0.004	Canonical	ZMIZ2	ENSG00000122515.15	protein_coding	Y
	0.01	2.11	SFSTVHEKF	9		0.025	Canonical	WDR36	ENSG00000134987.11	protein_coding	Y
	0.01	2.06	RYSDSTFTF	9		0.0017	Canonical	PARP8	ENSG00000151883.18	protein_coding	Y
	0.01	2.06	RYSDSTFTF	9		0.0017	Canonical	AC245297.3	ENSG00000274265.5	lncRNA	Y
	0.01	2.06	RYSDSTFTF	9		0.0017	Canonical	LINC01145	ENSG00000272419.6	transcribed_unprocessed_pseudogene	Y
	0.01	2.06	RYSDSTFTF	9		0.0017	Canonical	AC244669.1	ENSG00000223804.5	transcribed_unprocessed_pseudogene	Y
	0.01	2.06	RYSDSTFTF	9		0.0017	Canonical	AC242842.2	ENSG00000284964.1	transcribed_unprocessed_pseudogene	Y
	0.01	1.55	AYTTVLQEW	9		0.0294	Canonical	KANK2	ENSG00000197256.10	protein_coding	Y
	0.01	2.68	KYVKGLISI	9		0.0489	Canonical	WDR35	ENSG00000118965.14	protein_coding	Y
	PF		PYIIHTVLY	9		0.4419	Canonical	UBR4	ENSG00000127481.15	protein_coding
	0.01	1.62	QYSNAFDVF	9		0.0347	Canonical	TOB1	ENSG00000141232.5	protein_coding	Y
	0.05	1.45	AYAENIALL	9		0.0408	Canonical	PIK3R4	ENSG00000196455.8	protein_coding	Y
	0.01	1.51	NYPQSVPRL	9		0.0343	Canonical	MYO1C	ENSG00000197879.17	protein_coding	Y
	0.01	1.61	VYTTTRSHL	9		0.1958	Canonical	CLPTM1L	ENSG00000049656.14	protein_coding	Y
	0.01	1.78	SYVVAMETF	9		0.012	Canonical	DDB1	ENSG00000167986.13	protein_coding	Y
	0.01	1.73	RYAALRELI	9		0.118	Canonical	CCDC97	ENSG00000142039.4	protein_coding	Y
	0.01	1.74	VYIIGSSGF	9		0.0363	Canonical	SCCPDH	ENSG00000143653.10	protein_coding	Y
	0.01	2.8	KYITQGQLL	9		0.0186	Canonical	ELOVL5	ENSG00000012660.14	protein_coding	Y
	0.01	2.72	KYSEVFEAI	9		0.0194	Canonical	CSNK2A1	ENSG00000101266.19	protein_coding	Y
	0.01	2.72	KYSEVFEAI	9		0.0194	Canonical	CSNK2A3	ENSG00000254598.2	protein_coding	Y
	0.01	2.72	KYSEVFEAI	9		0.0194	Canonical	CSNK2A2	ENSG00000070770.9	protein_coding	Y
	0.01	1.96	HYTIVFNTF	9		0.0055	Canonical	ATP2B1	ENSG00000070961.15	protein_coding	Y
	0.01	1.96	HYTIVFNTF	9		0.0055	Canonical	ATP2B4	ENSG00000058668.14	protein_coding	Y
	0.05	1.41	VYSIISVQL	9		0.0142	Canonical	TMBIM1	ENSG00000135926.15	protein_coding	Y
	0.01	2.17	RYLERLIKL	9		0.0123	Canonical	AC006538.1	ENSG00000172009.15	protein_coding	Y
	0.01	1.98	QYAIISEAW	9		0.0767	Canonical	CRYL1	ENSG00000165475.15	protein_coding	Y
	PF		KYLTVNKRL	9		0.1386	Canonical	ITPR1	ENSG00000150995.19	protein_coding
	PF		NYLTKIYGL	9		0.1189	Canonical	PODN	ENSG00000174348.13	protein_coding
	PF		KYLTVNKRL	9		0.1386	Canonical	ITPR2	ENSG00000123104.12	protein_coding
	PF		KYLTVNKRL	9		0.1386	Canonical	ITPR3	ENSG00000096433.11	protein_coding
	PF		DYAVVLNQL	9		0.165	Canonical	CUL7	ENSG00000044090.8	protein_coding
	0.01	1.45	YYTSVTPVL	9		0.0429	Canonical	PTBP1	ENSG00000011304.20	protein_coding	Y
	0.01	1.45	YYTSVTPVL	9		0.0429	Canonical	PTBP1P	ENSG00000259078.2	processed_pseudogene	Y
	0.05	1.62	RYAEAVQLL	9		0.0055	Canonical	TTC30A	ENSG00000197557.7	protein_coding	Y
	0.05	1.62	RYAEAVQLL	9		0.0055	Canonical	TTC30B	ENSG00000196659.9	protein_coding	Y
	0.01	1.78	QYLMDNPTF	9		0.0174	Canonical	PRPF40A	ENSG00000196504.16	protein_coding	Y
	0.01	1.52	VQTAVINVF	9		0.7884	Canonical	PRR5L	ENSG00000135362.14	protein_coding	Y
	0.05	1.52	VFAGVFNTF	9		0.008	Canonical	F13A1	ENSG00000124491.15	protein_coding	N
	0.05	1.24	EYNEVANLF	9		0.0184	Canonical	PARP11	ENSG00000111224.14	protein_coding	Y
	0.01	2.42	VYKVVGNLL	9		0.0544	Canonical	IQGAP3	ENSG00000183856.11	protein_coding	Y
	0.01	1.99	TYQDIQNTI	9		0.0148	Canonical	POLR2A	ENSG00000181222.16	protein_coding	Y
	0.01	1.68	SYSQSSNLF	9		0.0086	Canonical	ZNF24	ENSG00000172466.16	protein_coding	Y
	0.05	1.39	VYGDFQEAF	9		0.0117	Canonical	TENT5A	ENSG00000112773.16	protein_coding	Y
	0.05	1.28	IYVISAETF	9		0.0072	Canonical	ATP5PB	ENSG00000116459.11	protein_coding	Y
	PF		GYNVKFDMF	9		0.1224	Canonical	GPX4	ENSG00000167468.16	protein_coding
	0.01	1.42	FYVPGVAPI	9		0.2751	Canonical	TM9SF4	ENSG00000101337.15	protein_coding	Y
	PF		NYTLYPITF	9		0.0093	Canonical	GXYLT1	ENSG00000151233.11	protein_coding
	0.01	1.07	NYPVWDTQF	9		0.0396	Canonical	TAF5	ENSG00000148835.11	protein_coding	Y
	0.01	2.41	TYFRFQEEI	9		0.1035	Canonical	TNFSF10	ENSG00000121858.11	protein_coding	Y
	PF		VYSEVHFTL	9		0.0028	Canonical	SYNPO	ENSG00000171992.13	protein_coding
	0.01	1.98	VYINEVRVI	9		0.0399	Canonical	VIRMA	ENSG00000164944.12	protein_coding	Y
	0.01	2.42	RYPNRFKLW	9		0.043	Canonical	CYB5R1	ENSG00000159348.13	protein_coding	Y
	PF		SYPDLLPTF	9		0.001	Canonical	EIF2D	ENSG00000143486.16	protein_coding
	0.05	1.1	KYLGLLENL	9		0.0423	Canonical	MYO1C	ENSG00000197879.17	protein_coding	Y
	0.01	1.74	KYKSAFNKL	9		0.0164	Canonical	DENND4B	ENSG00000198837.10	protein_coding	Y
	0.01	2.22	AYLEAHETF	9		0.0021	Canonical	NUP107	ENSG00000111581.10	protein_coding	Y
	0.01	1.27	EYGRILTRL	9		0.1241	Canonical	STYXL1	ENSG00000127952.17	protein_coding	Y
	0.01	1.84	DYVRQTWKL	9		0.1094	Canonical	ZAP70	ENSG00000115085.13	protein_coding	Y
	0.01	1.45	IYKDSSTFL	9		0.0509	Canonical	METTL14	ENSG00000145388.15	protein_coding	Y
	PF		HYPPVQVLF	9		0.0017	Canonical	MSH6	ENSG00000116062.15	protein_coding
	0.05	1.87	NYVQAVEEF	9		0.0118	Canonical	NASP	ENSG00000132780.17	protein_coding	Y
	0.05	1.87	NYVQAVEEF	9		0.0118	Canonical	AC022182.3	ENSG00000255397.1	processed_pseudogene	Y
	0.05	1.47	EYGNIIVTL	9		0.0462	Canonical	PTPRG	ENSG00000144724.20	protein_coding	N
	0.05	1.08	AYGWVSATF	9		0.0095	Canonical	MFSD14B	ENSG00000148110.15	protein_coding	N
	0.05	1.65	VYTSGIYNI	9		0.014	Canonical	TNS1	ENSG00000079308.19	protein_coding	Y
	0.05	1.5	EYGFISQTL	9		0.0972	Canonical	TMCC3	ENSG00000057704.13	protein_coding	Y
	PF		TYSHGNYLF	9		0.0071	Canonical	VAMP7	ENSG00000124333.16_PAR_Y	protein_coding
	PF		TYSHGNYLF	9		0.0071	Canonical	VAMP7	ENSG00000124333.16	protein_coding
	PF	1.61	VYNTATNQW	9		0.0207	Canonical	HCFC1	ENSG00000172534.14	protein_coding
	PF	1.61	VYNTATNQW	9		0.0207	Canonical	HCFC2	ENSG00000111727.12	protein_coding
	PF		PYILSDKLV	9		1.3778	Canonical	VPS8	ENSG00000156931.15	protein_coding
	0.05	1.37	VYSDYLQTI	9		0.0065	Canonical	PCED1B	ENSG00000179715.13	protein_coding	Y
	0.01	1.72	VYAVVRGLF	9		0.0378	Canonical	MFSD13A	ENSG00000138111.14	protein_coding	N
	0.05	1.46	QYLKILTSL	9		0.0277	Canonical	HACE1	ENSG00000085382.12	protein_coding	Y
	0.05	1.39	RYRPGTVAL	9		0.1297	Canonical	H3F3B	ENSG00000132475.10	protein_coding	Y
	0.05	1.39	RYRPGTVAL	9		0.1297	Canonical	H3F3AP5	ENSG00000226881.5	processed_pseudogene	Y
	0.05	1.39	RYRPGTVAL	9		0.1297	Canonical	HIST2H3PS2	ENSG00000273213.3	protein_coding	Y
	0.05	1.39	RYRPGTVAL	9		0.1297	Canonical	HIST2H3C	ENSG00000203811.1	protein_coding	Y
	0.05	1.39	RYRPGTVAL	9		0.1297	Canonical	HIST2H3A	ENSG00000203852.3	protein_coding	Y
	0.05	1.39	RYRPGTVAL	9		0.1297	Canonical	HIST1H3H	ENSG00000278828.1	protein_coding	Y
	0.05	1.39	RYRPGTVAL	9		0.1297	Canonical	H3F3A	ENSG00000163041.11	protein_coding	Y
	0.05	1.39	RYRPGTVAL	9		0.1297	Canonical	HIST1H3B	ENSG00000286522.1	protein_coding	Y
	0.01	1.87	KYMEDYHQF	9	1xOxidation [M3]	0.0005	Canonical	PPL	ENSG00000118898.16	protein_coding	Y
	0.05	1.39	RYRPGTVAL	9		0.1297	Canonical	HIST3H3	ENSG00000168148.3	protein_coding	Y
	0.05	1.39	RYRPGTVAL	9		0.1297	Canonical	HIST1H3E	ENSG00000274750.2	protein_coding	Y
	0.05	1.39	RYRPGTVAL	9		0.1297	Canonical	HIST1H3C	ENSG00000287080.1	protein_coding	Y
	0.05	1.39	RYRPGTVAL	9		0.1297	Canonical	HIST2H3D	ENSG00000183598.3	protein_coding	Y
	PF		VYSKTQQSF	9		0.003	Canonical	UBAP2L	ENSG00000143569.19	protein_coding
	0.05	1.39	RYRPGTVAL	9		0.1297	Canonical	H3F3AP4	ENSG00000235655.3	processed_pseudogene	Y
	0.05	1.8	DYAEVSNTF	9		0.0211	Canonical	POLR3C	ENSG00000186141.9	protein_coding	Y
	0.05	1.39	RYRPGTVAL	9		0.1297	Canonical	H3F3AP6	ENSG00000178458.5	processed_pseudogene	Y
	0.05	1.39	RYRPGTVAL	9		0.1297	Canonical	HIST1H3A	ENSG00000275714.1	protein_coding	Y
	0.05	1.39	RYRPGTVAL	9		0.1297	Canonical	HIST1H3D	ENSG00000197409.7	protein_coding	Y
	0.05	1.39	RYRPGTVAL	9		0.1297	Canonical	HIST1H3F	ENSG00000277775.1	protein_coding	Y
	0.05	1.39	RYRPGTVAL	9		0.1297	Canonical	HIST1H3I	ENSG00000275379.1	protein_coding	Y
	0.05	1.26	AYLVNTYAL	9		0.1272	Canonical	MTCH2	ENSG00000109919.10	protein_coding	Y
	0.05	1.39	RYRPGTVAL	9		0.1297	Canonical	HIST1H3J	ENSG00000197153.4	protein_coding	Y
	0.05	1.39	RYRPGTVAL	9		0.1297	Canonical	AL031777.3	ENSG00000282988.2	protein_coding	Y
	0.05	1.39	RYRPGTVAL	9		0.1297	Canonical	HIST1H3G	ENSG00000273983.1	protein_coding	Y
	0.05	1.39	RYRPGTVAL	9		0.1297	Canonical	H3F3C	ENSG00000188375.5	protein_coding	Y
	0.05	1.39	RYRPGTVAL	9		0.1297	Canonical	AC002367.1	ENSG00000226436.1	processed_pseudogene	Y
	0.05	1.39	RYRPGTVAL	9		0.1297	Canonical	AC023886.2	ENSG00000250966.2	processed_pseudogene	Y
	PF		QYPEVKEFF	9		0.0047	Canonical	ERCC6L2	ENSG00000182150.16	protein_coding
	PF		AYMREHNQL	9		0.0744	Canonical	GPNMB	ENSG00000136235.16	protein_coding
	0.05	1.32	FYSNIQTVI	9		0.1297	Canonical	POLR2A	ENSG00000181222.16	protein_coding	Y
	0.01	2.81	KYLTEGLLQF	10		0.0152	Canonical	NFE2L1	ENSG00000082641.16	protein_coding	Y
	0.05	1.8	TYTEVVTEF	9		0.0032	Canonical	AEBP1	ENSG00000106624.11	protein_coding	Y
	0.05	1.2	QWPPDPPLHF	10		0.0276	Canonical	EPAS1	ENSG00000116016.14	protein_coding	Y
	0.01	1.95	RYTPVGRSFF	10		0.0278	Canonical	AGO4	ENSG00000134698.11	protein_coding	Y
	0.01	1.95	RYTPVGRSFF	10		0.0278	Canonical	AGO2	ENSG00000123908.12	protein_coding	Y
	0.05	1.42	SYGTVSQIF	9		0.0064	Canonical	CLEC5A	ENSG00000258227.7	protein_coding	Y
	0.01	1.95	RYTPVGRSFF	10		0.0278	Canonical	AGO1	ENSG00000092847.12	protein_coding	Y
	0.05	1.42	VYSEVAAYEF	10		0.0157	Canonical	DRG1	ENSG00000185721.12	protein_coding	Y
	PF		RYLPSHRLI	9		0.0305	Canonical	GIMAP6	ENSG00000133561.15	protein_coding
	0.01	3.16	KYITKSFNFY	10		0.4986	Canonical	PARN	ENSG00000140694.17	protein_coding	Y
	PF		KAFASNLPTL	10		0.9659	Canonical	BICRA	ENSG00000063169.10	protein_coding
	PF		IWPGGVLPKF	10		0.0813	Canonical	SNX19	ENSG00000120451.10	protein_coding
	PF		IWPGGVLPKF	10		0.0813	Canonical	SNX19P1	ENSG00000228184.1	processed_pseudogene
	PF		IWPGGVLPKF	10		0.0813	Canonical	SNX19P3	ENSG00000264570.1	processed_pseudogene
	PF		PEYKPTRTPF	10		1.4893	Canonical	CHD7	ENSG00000171316.12	protein_coding
	PF		VYTWPSGNTF	10		0.0097	Canonical	JPH2	ENSG00000149596.6	protein_coding
	0.05	1.48	AYKGVHPHI	9		0.0893	Canonical	NEBL	ENSG00000078114.18	protein_coding	Y
	0.01	2.27	TYLPAPEGLKF	11		0.0064	Canonical	TNC	ENSG00000041982.16	protein_coding	Y
	PF		KYLDALNVF	9		0.0055	Canonical	KIAA0355	ENSG00000166398.12	protein_coding
	0.01	2.29	YIKQIKTF	8		0.4568	Canonical	RBL2	ENSG00000103479.16	protein_coding	Y
	0.01	2.04	YIKHPHLF	8		0.1119	Canonical	DNTTIP1	ENSG00000101457.13	protein_coding	Y
	0.01	2.77	YATHPFKF	8		0.3803	Canonical	NCOA7	ENSG00000111912.20	protein_coding	Y
	0.01	2.1	YVHMVTHF	8	1xOxidation [M4]	0.7436	Canonical	TMBIM6	ENSG00000139644.13	protein_coding	Y
	0.01	2.14	YGKDFHLI	8		1.5546	Canonical	MIER1	ENSG00000198160.14	protein_coding	Y
	0.01	2.43	VYSRTFTW	8		0.1535	Canonical	MYO1C	ENSG00000197879.17	protein_coding	Y
	0.01	2.68	YNKVHITL	8		0.8878	Canonical	PCBD1	ENSG00000166228.9	protein_coding	Y
	0.05	1.96	RYGPQFTL	8		0.2091	Canonical	PCDHGA4	ENSG00000262576.3	protein_coding	Y
	0.05	1.96	RYGPQFTL	8		0.2091	Canonical	PCDHGC5	ENSG00000240764.3	protein_coding	Y
	0.01	2.19	YQKAFEHL	8		1.1354	Canonical	BBS4	ENSG00000140463.14	protein_coding	Y
	0.05	1.96	RYGPQFTL	8		0.2091	Canonical	PCDHGC4	ENSG00000242419.5	protein_coding	Y
	0.05	1.96	RYGPQFTL	8		0.2091	Canonical	PCDHGA10	ENSG00000253846.2	protein_coding	Y
	0.05	1.96	RYGPQFTL	8		0.2091	Canonical	PCDHGA11	ENSG00000253873.6	protein_coding	Y
	0.05	1.96	RYGPQFTL	8		0.2091	Canonical	PCDHGC3	ENSG00000240184.7	protein_coding	Y
	0.05	1.96	RYGPQFTL	8		0.2091	Canonical	PCDHGA3	ENSG00000254245.2	protein_coding	Y
	0.05	1.96	RYGPQFTL	8		0.2091	Canonical	PCDHGA7	ENSG00000253537.3	protein_coding	Y
	0.05	1.96	RYGPQFTL	8		0.2091	Canonical	PCDHGA8	ENSG00000253767.2	protein_coding	Y
	0.05	1.96	RYGPQFTL	8		0.2091	Canonical	PCDHGA9	ENSG00000261934.2	protein_coding	Y
	0.05	1.96	RYGPQFTL	8		0.2091	Canonical	PCDHGA6	ENSG00000253731.2	protein_coding	Y
	0.01	3.15	RYLNKAFHIW	10		0.0812	Canonical	NCAPD3	ENSG00000151503.12	protein_coding	Y
	0.05	1.96	RYGPQFTL	8		0.2091	Canonical	PCDHGA2	ENSG00000081853.15	protein_coding	Y
	0.05	1.96	RYGPQFTL	8		0.2091	Canonical	PCDHGA12	ENSG00000253159.3	protein_coding	Y
	0.05	1.96	RYGPQFTL	8		0.2091	Canonical	PCDHGA1	ENSG00000204956.5	protein_coding	Y
	0.05	1.96	RYGPQFTL	8		0.2091	Canonical	PCDHGB2	ENSG00000253910.2	protein_coding	Y
	0.05	1.96	RYGPQFTL	8		0.2091	Canonical	PCDHGA5	ENSG00000253485.2	protein_coding	Y
	0.05	1.96	RYGPQFTL	8		0.2091	Canonical	PCDHGB6	ENSG00000253305.2	protein_coding	Y
	0.05	1.96	RYGPQFTL	8		0.2091	Canonical	PCDHGB7	ENSG00000254122.2	protein_coding	Y
	PF		GITDFILKF	9		1.8347	Canonical	RNFT1	ENSG00000189050.16	protein_coding
	PF		GITDFILKF	9		1.8347	Canonical	RNFT1P3	ENSG00000187870.7	unprocessed_pseudogene
	0.05	1.96	RYGPQFTL	8		0.2091	Canonical	PCDHGB3	ENSG00000262209.3	protein_coding	Y
	0.05	1.96	RYGPQFTL	8		0.2091	Canonical	PCDHGB1	ENSG00000254221.2	protein_coding	Y
	0.05	1.96	RYGPQFTL	8		0.2091	Canonical	PCDHGB4	ENSG00000253953.2	protein_coding	Y
	0.05	1.96	RYGPQFTL	8		0.2091	Canonical	PCDHGB5	ENSG00000276547.1	protein_coding	Y
	0.01	1.6	HYGKVYLL	8		0.3456	Canonical	VPS41	ENSG00000006715.16	protein_coding	Y
	0.01	2.13	TYDKGYQF	8		0.1745	Canonical	PEX5	ENSG00000139197.10	protein_coding	Y
	PF		AYGFVARI	8		1.667	Canonical	VWF	ENSG00000110799.13	protein_coding
	PF		YSHVIQKL	8		1.0111	Canonical	SDS	ENSG00000135094.11	protein_coding
	0.01	2.43	YDTVFKHF	8		0.7049	Canonical	SP140L	ENSG00000185404.16	protein_coding	Y
	0.01	2.05	FYGHFFRF	8		0.1729	Canonical	ELMOD2	ENSG00000179387.10	protein_coding	Y
	0.01	2.13	YIDKVRSL	8		1.7749	Canonical	LMNB1	ENSG00000113368.12	protein_coding	Y
	0.01	2.15	YQRAFQHL	8		1.1776	Canonical	PRKDC	ENSG00000253729.7	protein_coding	Y
	0.01	1.72	YIEHIFEI	8		1.0623	Canonical	PEA15	ENSG00000162734.12	protein_coding	Y
	PF		KYGNANVW	8		0.816	Canonical	PPP2CA	ENSG00000113575.10	protein_coding
	0.05	1.86	RYPMAVGL	8		1.0745	Canonical	RPL36	ENSG00000130255.13	protein_coding	N
	PF		KYGNANVW	8		0.816	Canonical	PPP2CB	ENSG00000104695.13	protein_coding
	PF		RFFPYTSSQMF	11		0.0787	Canonical	PIAS1	ENSG00000033800.13	protein_coding
	0.05	1.69	AWPKVLKI	8		1.1223	Canonical	EPB41L3	ENSG00000082397.17	protein_coding	Y
	0.01	1.88	NYTNGSFGSNF	11		0.2536	Canonical	DDX5	ENSG00000108654.14	protein_coding	Y
	PF		IYCDVREF	8		0.4371	Canonical	LGALS8	ENSG00000116977.18	protein_coding
	0.05	1.05	IYGSSHSW	8		0.2469	Canonical	DUOX1	ENSG00000137857.17	protein_coding	Y
	0.05	1.05	IYGSSHSW	8		0.2469	Canonical	DUOX2	ENSG00000140279.12	protein_coding	Y
	0.01	1.9	VWSNVTPLKF	10		0.0738	Canonical	MMP12	ENSG00000262406.2	protein_coding	Y
	0.01	1.72	RYPDSHQLF	9		0.0024	Canonical	G3BP2	ENSG00000138757.14	protein_coding	Y
	0.01	2.84	DYLEKYYKF	9		0.0049	Canonical	NNMT	ENSG00000166741.7	protein_coding	Y
	0.01	2.88	KYIKDDFRF	9		0.0095	Canonical	RIOK3	ENSG00000101782.15	protein_coding	Y
	PF		YSHLRYVF	8		1.4729	Canonical	FAT1	ENSG00000083857.14	protein_coding
	0.05	2.4	RYAVIGADL	9		0.3936	Canonical	LCMT1	ENSG00000205629.12	protein_coding	Y
	0.01	2.98	IYQRDPLKL	9		0.018	Canonical	STAT6	ENSG00000166888.12	protein_coding	Y
	PF		IYVQEMAKL	9		0.0562	Canonical	H2AFY2	ENSG00000099284.14	protein_coding
	PF		IYVQEMAKL	9		0.0562	Canonical	H2AFY	ENSG00000113648.16	protein_coding
	0.01	2.72	RYSPVLSRF	9		0.002	Canonical	COG1	ENSG00000166685.12	protein_coding	Y
	0.01	2	PYGNIQSRL	9		0.2465	Canonical	GALNT2	ENSG00000143641.10	protein_coding	Y
	0.01	2.09	RYLEQLHQL	9		0.0039	Canonical	STAT3	ENSG00000168610.14	protein_coding	Y
	0.01	2.74	TYQEVAQKF	9		0.0018	Canonical	ADA2	ENSG00000093072.18	protein_coding	Y
	0.01	3.24	KYQEEFEHF	9		0.0011	Canonical	LMAN1	ENSG00000074695.6	protein_coding	Y
	0.01	2.6	RYLEKPMEI	9		0.0104	Canonical	STAT3	ENSG00000168610.14	protein_coding	Y
	PF		KYMKIFHKF	9		0.0004	Canonical	ZNF681	ENSG00000196172.9	protein_coding
	PF		VYSLIKNKI	9		0.0476	Canonical	PRKAG2	ENSG00000106617.14	protein_coding
	0.01	2.45	VYVQELQKL	9		0.0094	Canonical	EEA1	ENSG00000102189.16	protein_coding	Y
	0.01	1.51	SYLESFYHM	9		0.0099	Canonical	ERAP2	ENSG00000164308.16	protein_coding	Y
	0.01	2.61	RYLEVMRKL	9		0.0208	Canonical	PTPA	ENSG00000119383.19	protein_coding	Y
	PF		KYDEGLYRF	9		0.007	Canonical	DCLRE1A	ENSG00000198924.8	protein_coding
	0.01	1.92	LFIATSQKF	9		0.054	Canonical	NCAPH2	ENSG00000025770.19	protein_coding	Y
	0.01	2.27	TYNPAFSRL	9		0.0099	Canonical	TMEM181	ENSG00000146433.8	protein_coding	Y
	PF		FYITSRTQF	9		0.0192	Canonical	SRC	ENSG00000197122.11	protein_coding
	0.01	2.12	PWPKVLKI	8		1.9175	Canonical	EPB41	ENSG00000159023.21	protein_coding	Y
	0.01	2.49	RYSSMAASF	9		0.0099	Canonical	PDZK1IP1	ENSG00000162366.8	protein_coding	Y
	PF		KYDEFIHKI	9		0.0151	Canonical	CALML4	ENSG00000129007.14	protein_coding
	0.01	2	YIDTIWKI	8		0.827	Canonical	CARNMT1	ENSG00000156017.13	protein_coding	Y
	PF		KYDEFIHKI	9		0.0151	Canonical	AC107871.1	ENSG00000260007.3	protein_coding
	PF		IYLLNPCHL	9		0.0585	Canonical	TMEM164	ENSG00000157600.12	protein_coding
	0.01	2.22	LYQKDFLRI	9		0.0458	Canonical	FRMD6	ENSG00000139926.15	protein_coding	Y
	0.01	1.43	IYAVVHLL	8		0.153	Canonical	ARFGEF3	ENSG00000112379.9	protein_coding	Y
	PF		RYLPKLKAF	9		0.0174	Canonical	CRY2	ENSG00000121671.11	protein_coding
	PF		VYVNINRI	8		0.83	Canonical	TRIO	ENSG00000038382.20	protein_coding
	0.01	2.38	SYIAHLRQL	9		0.05	Canonical	MSC	ENSG00000178860.8	protein_coding
	0.01	2.38	SYIAHLRQL	9		0.05	Canonical	TCF21	ENSG00000118526.6	protein_coding
	0.01	1.53	NYATRIVTL	9		0.0318	Canonical	BIRC6	ENSG00000115760.14	protein_coding	Y
	0.01	2.06	TYRNVMEQF	9		0.0193	Canonical	BAIAP2L1	ENSG00000006453.14	protein_coding	Y
	PF		DYAYLREHF	9		0.1446	Canonical	ZNF598	ENSG00000167962.14	protein_coding
	0.01	2.16	APKPYHKF	8		1.8394	Canonical	TNIK	ENSG00000154310.17	protein_coding	Y
	0.01	1.71	VYQVLQEHL	9		0.0181	Canonical	BMP7	ENSG00000101144.13	protein_coding	Y
	0.05	1.23	YLPHVARL	8		1.1909	Canonical	SURF4	ENSG00000148248.14	protein_coding	Y
	0.01	2.03	YSSKLYRF	8		0.4606	Canonical	KCTD20	ENSG00000112078.14	protein_coding	Y
	0.01	2.16	APKPYHKF	8		1.8394	Canonical	MINK1	ENSG00000141503.17	protein_coding	Y
	0.05	1.37	YLEKYYKF	8		0.1778	Canonical	NNMT	ENSG00000166741.7	protein_coding	Y
	0.01	2.61	LYNHVKQLL	9		0.0602	Canonical	XPO5	ENSG00000124571.18	protein_coding	Y
	PF		DYDSVFHHL	9		0.0747	Canonical	EPC1	ENSG00000120616.16	protein_coding
	0.01	1.78	YGDITIHF	8		0.2758	Canonical	PDZD8	ENSG00000165650.12	protein_coding	Y
	PF		PFYDKPMRI	9		0.3996	Canonical	SNRPA	ENSG00000077312.9	protein_coding
	0.01	2.16	APKPYHKF	8		1.8394	Canonical	MAP4K4	ENSG00000071054.16	protein_coding	Y
	0.01	2.23	KYITEVSRW	9		0.0233	Canonical	CEP135	ENSG00000174799.10	protein_coding	Y
	0.01	1.71	VQPSKYHFL	9		0.2513	Canonical	MAGEF1	ENSG00000177383.4	protein_coding	Y
	PF		YTPITPHL	8		0.6934	Canonical	PTBP3	ENSG00000119314.15	protein_coding
	0.01	1.93	IYKKYPNMF	9		0.0079	Canonical	AHCYL2	ENSG00000158467.16	protein_coding	Y
	0.05	1.33	TYGKPVTF	8		0.0615	Canonical	TM2D3	ENSG00000184277.13	protein_coding	Y
	0.01	1.57	TYIPVPAKI	9		0.0054	Canonical	ST3GAL1	ENSG00000008513.16	protein_coding	Y
	0.01	2.38	QYVSAFSKL	9		0.0467	Canonical	STOML2	ENSG00000165283.16	protein_coding	Y
	0.01	1.41	TYLEKFQNL	9		0.0048	Canonical	CLUAP1	ENSG00000103351.13	protein_coding	Y
	0.01	1.82	TYLTNHLRL	9		0.0376	Canonical	ZNF697	ENSG00000143067.5	protein_coding	Y
	PF		KYNETFHFL	9		0.0037	Canonical	UNC13B	ENSG00000198722.14	protein_coding
	0.01	1.76	NYVEVTRKW	9		0.0671	Canonical	MTX1	ENSG00000173171.14	protein_coding	Y
	0.01	2.6	QYLERLKQF	9		0.0156	Canonical	ABHD17C	ENSG00000136379.12	protein_coding	Y
	0.01	2.6	QYLERLKQF	9		0.0156	Canonical	ABHD17B	ENSG00000107362.13	protein_coding	Y
	PF		YPPKLHQF	8		0.1647	Canonical	CCNE1	ENSG00000105173.14	protein_coding
	0.01	1.56	VYTDCSNKL	9		0.1739	Canonical	PRR14L	ENSG00000183530.14	protein_coding	Y
	PF		KYFLWVVKF	9		0.0223	Canonical	GRB2	ENSG00000177885.15	protein_coding
	0.01	1.76	NYVEVTRKW	9		0.0671	Canonical	MTX1P1	ENSG00000236675.1	unprocessed_pseudogene	Y
	PF		SYKYEHLRW	9		0.1437	Canonical	FLT4	ENSG00000037280.16	protein_coding
	0.01	2.59	LYRLKFNEF	9		0.1272	Canonical	ARL4C	ENSG00000188042.8	protein_coding	Y
	PF		HYKLDWHRF	9		0.0288	Canonical	ANKZF1	ENSG00000163516.13	protein_coding
	PF		IYINSRSVF	9		0.0369	Canonical	CAPN5	ENSG00000149260.18	protein_coding
	0.01	2.26	TYGIKHMKF	9		0.0164	Canonical	PIGK	ENSG00000142892.15	protein_coding	Y
	0.05	1.31	YADIVQLL	8		0.6298	Canonical	OSTF1	ENSG00000134996.11	protein_coding	Y
	0.01	3.73	KYMETIEKL	9		0.0044	Canonical	PPP1R21	ENSG00000162869.16	protein_coding	Y
	0.01	2.24	VYMELSQKL	9	1xOxidation [M3]	0.0038	Canonical	FRMD6	ENSG00000139926.15	protein_coding	Y
	0.01	1.89	RYRPQHIFF	9		0.0152	Canonical	CYB561	ENSG00000008283.16	protein_coding	Y
	PF		EYLEAHLKF	9		0.0072	Canonical	USP24	ENSG00000162402.14	protein_coding
	0.01	2.29	SYVHYVFRL	9		0.0435	Canonical	DOCK8	ENSG00000107099.15	protein_coding	Y
	PF		YYGLYRDLF	9		0.0556	Canonical	MRPL38	ENSG00000204316.12	protein_coding
	0.01	2.17	IYQKAFEHL	9		0.0043	Canonical	BBS4	ENSG00000140463.14	protein_coding	Y
	PF		EQPYKWEKF	9		0.5292	Canonical	ZNF254	ENSG00000213096.10	protein_coding
	0.01	2.09	MYGFVNHAL	9		0.1696	Canonical	GUCY1B1	ENSG00000061918.13	protein_coding	Y
	0.01	2.01	YFKDTHPKF	9		0.0196	Canonical	CYB5R3	ENSG00000100243.21	protein_coding	Y
	0.01	1.57	QYNMNFEKL	9		0.0717	Canonical	CASP7	ENSG00000165806.19	protein_coding	Y
	0.01	2.14	TYMPHVHIL	9	1xOxidation [M3]	0.0038	Canonical	FBXO38	ENSG00000145868.16	protein_coding	Y
	0.01	1.64	KYNQVNSHF	9		0.0078	Canonical	CASZ1	ENSG00000130940.15	protein_coding	Y
	0.01	1.58	EYLKVDAQF	9		0.0267	Canonical	YARS	ENSG00000134684.10	protein_coding	Y
	0.05	2.16	VYLRETTLI	9		0.0164	Canonical	DHX29	ENSG00000067248.10	protein_coding	Y
	0.01	1.91	SYNNFFRMF	9		0.0072	Canonical	PPP2R2B	ENSG00000156475.18	protein_coding	Y
	PF		VYRRDQLHF	9		0.04	Canonical	HOMEZ	ENSG00000215271.7	protein_coding
	0.01	1.91	SYNNFFRMF	9		0.0072	Canonical	PPP2R2A	ENSG00000221914.11	protein_coding	Y
	0.01	1.91	SYNNFFRMF	9		0.0072	Canonical	PPP2R2D	ENSG00000175470.20	protein_coding	Y
	0.01	2.79	KYAHMINGF	9		0.0146	Canonical	ADSS	ENSG00000035687.10	protein_coding	Y
	0.01	2.64	QYLPHVARL	9		0.0142	Canonical	SURF4	ENSG00000148248.14	protein_coding	Y
	PF		RYVWWKKSL	9		0.3427	Canonical	UPF2	ENSG00000151461.20	protein_coding
	PF		AYVQALARF	9		0.0152	Canonical	ARFGEF1	ENSG00000066777.9	protein_coding
	0.01	2.48	SYARHFLDF	9		0.0119	Canonical	ZADH2	ENSG00000180011.7	protein_coding	Y
	PF		AYVQALARF	9		0.0152	Canonical	ARFGEF2	ENSG00000124198.9	protein_coding
	0.01	1.93	NYADQISRL	9		0.1204	Canonical	MAPK8IP3	ENSG00000138834.12	protein_coding	Y
	0.01	1.95	VFKPISSTW	9		0.0466	Canonical	BIRC6	ENSG00000115760.14	protein_coding	Y
	0.01	1.93	NYADQISRL	9		0.1204	Canonical	SPAG9	ENSG00000008294.21	protein_coding	Y
	0.01	1.84	SYPSAFSKL	9		0.0273	Canonical	MARF1	ENSG00000166783.22	protein_coding	Y
	0.01	1.29	EYNTVASKF	9		0.046	Canonical	PARP14	ENSG00000173193.15	protein_coding	Y
	0.01	1.94	AYVEKVERL	9		0.0462	Canonical	AMOTL2	ENSG00000114019.14	protein_coding	Y
	0.01	2.5	QYESKVFYL	9		0.0912	Canonical	YWHAG	ENSG00000170027.7	protein_coding	Y
	0.01	2.5	QYESKVFYL	9		0.0912	Canonical	YWHAH	ENSG00000128245.15	protein_coding	Y
	0.01	2.24	KYTAVVKMI	9		0.1208	Canonical	KIN	ENSG00000151657.12	protein_coding	Y
	0.01	1.84	VYIDRVRSL	9		0.0206	Canonical	LMNA	ENSG00000160789.20	protein_coding	Y
	PF		IYQQVRDEL	9		0.0653	Canonical	SATB2	ENSG00000119042.17	protein_coding
	PF		TYPIKTPTF	9		0.0018	Canonical	GALNT3	ENSG00000115339.13	protein_coding
	0.01	2.19	VYLAAVNRL	9		0.0139	Canonical	PLXND1	ENSG00000004399.12	protein_coding	Y
	0.01	1.78	VYNPELDKW	9		0.0343	Canonical	KLHL11	ENSG00000178502.6	protein_coding	Y
	0.01	2.33	LYLTNCEKL	9		0.1987	Canonical	ZER1	ENSG00000160445.11	protein_coding	Y
	PF		VYGPMKNYL	9		0.0269	Canonical	ANPEP	ENSG00000166825.14	protein_coding
	0.01	2.36	RYIKALETL	9		0.0093	Canonical	RAD50	ENSG00000113522.14	protein_coding	Y
	0.01	2.36	RYIKALETL	9		0.0093	Canonical	AC116366.3	ENSG00000283782.2	protein_coding	Y
	PF		YYEKQFPEI	9		0.0595	Canonical	NCOR2	ENSG00000196498.13	protein_coding
	PF		YYEKQFPEI	9		0.0595	Canonical	NCOR1	ENSG00000141027.21	protein_coding
	0.01	2.48	AYATHPFKF	9		0.0036	Canonical	NCOA7	ENSG00000111912.20	protein_coding	Y
	PF		KYPSDLPYM	9	1xOxidation [M9]	0.058	Canonical	ERG	ENSG00000157554.19	protein_coding
	PF		VYKEAMNHL	9		0.0183	Canonical	DHFR2	ENSG00000178700.7	protein_coding
	0.01	2.67	VYIDKVRSL	9		0.0145	Canonical	LMNB1	ENSG00000113368.12	protein_coding	Y
	0.05	2.1	RYGDGGSTF	9		0.0154	Canonical	HNRNPH1	ENSG00000169045.17	protein_coding	Y
	0.01	2.35	IYLRDPVQV	9		0.1272	Canonical	TPP2	ENSG00000134900.12	protein_coding	Y
	0.01	1.96	FYTKRFQEL	9		0.0407	Canonical	PFAS	ENSG00000178921.14	protein_coding	Y
	0.01	1.67	TYSIGFLRF	9		0.0072	Canonical	TMEM184A	ENSG00000164855.16	protein_coding	Y
	0.01	1.67	TYSIGFLRF	9		0.0072	Canonical	TMEM184B	ENSG00000198792.13	protein_coding	Y
	0.01	2.01	AFIKKSHLL	9		0.1573	Canonical	ZNF684	ENSG00000117010.17	protein_coding	Y
	0.01	2.37	TYLRKIPRF	9		0.0026	Canonical	CCDC14	ENSG00000175455.15	protein_coding	Y
	0.01	1.65	RYTTEFHEL	9		0.0125	Canonical	WEE1	ENSG00000166483.11	protein_coding	Y
	0.01	1.79	KYGVHEAIF	9		0.0911	Canonical	PPARD	ENSG00000112033.14	protein_coding	Y
	0.01	2.34	KYAQWEESL	9		0.0911	Canonical	CRNKL1	ENSG00000101343.14	protein_coding	Y
	PF		VYQDYHTVW	9		0.015	Canonical	COMMD8	ENSG00000169019.11	protein_coding
	0.01	2.55	RYLDASNEL	9		0.0497	Canonical	NEK4	ENSG00000114904.13	protein_coding	Y
	0.01	2	AYQKQPTIF	9		0.0175	Canonical	RPS11P5	ENSG00000232888.4	processed_pseudogene	Y
	0.01	2	AYQKQPTIF	9		0.0175	Canonical	RPS11	ENSG00000142534.7	protein_coding	Y
	0.01	1.91	TYAPAIHQI	9		0.0027	Canonical	ARID2	ENSG00000189079.17	protein_coding	Y
	PF		SMTRYFYLF	9		0.2762	Canonical	CASP4	ENSG00000196954.14	protein_coding
	PF		TYLNWLVRM	9		0.145	Canonical	ABCC1	ENSG00000103222.19	protein_coding
	0.01	2.78	KYIKKFPLL	9		0.004	Canonical	UBE3D	ENSG00000118420.17	protein_coding	Y
	PF		SMTRYFYLF	9		0.2762	Canonical	CASP12	ENSG00000204403.9	polymorphic_pseudogene
	PF		SMTRYFYLF	9		0.2762	Canonical	CASP17P	ENSG00000235505.7	transcribed_unprocessed_pseudogene
	0.01	2.02	KYPDRVPVI	9		0.0193	Canonical	GABARAPL1	ENSG00000139112.11	protein_coding	Y
	0.01	2.02	KYPDRVPVI	9		0.0193	Canonical	GABARAP	ENSG00000170296.10	protein_coding	Y
	0.01	2.02	KYPDRVPVI	9		0.0193	Canonical	GABARAPL2	ENSG00000034713.8	protein_coding	Y
	0.01	1.7	IYSTTLWHL	9		0.01	Canonical	CDC27	ENSG00000004897.12	protein_coding	Y
	0.01	1.7	IYSTTLWHL	9		0.01	Canonical	CDC27P1	ENSG00000233786.1	processed_pseudogene	Y
	0.01	1.7	IYSTTLWHL	9		0.01	Canonical	CDC27P2	ENSG00000237447.1	processed_pseudogene	Y
	0.01	2.02	KYPDRVPVI	9		0.0193	Canonical	AC016559.2	ENSG00000250330.1	processed_pseudogene	Y
	0.05	1.74	EYRPEFSNF	9		0.0421	Canonical	PARP4	ENSG00000102699.6	protein_coding	Y
	0.05	1.74	EYRPEFSNF	9		0.0421	Canonical	PARP4P2	ENSG00000224976.2	unprocessed_pseudogene	Y
	0.01	1.85	KQQKLWHLF	9		0.1837	Canonical	C16orf72	ENSG00000182831.12	protein_coding	Y
	0.05	1.16	LYMKNGQGF	9		0.0196	Canonical	RAP1B	ENSG00000127314.18	protein_coding	Y
	0.05	1.16	LYMKNGQGF	9		0.0196	Canonical	RAP1A	ENSG00000116473.14	protein_coding	Y
	0.05	1.16	LYMKNGQGF	9		0.0196	Canonical	AC113404.3	ENSG00000254893.6	translated_processed_pseudogene	Y
	0.05	1.16	LYMKNGQGF	9		0.0196	Canonical	RAP1AP	ENSG00000258769.1	processed_pseudogene	Y
	PF		KYTKNIVSW	9		0.0114	Canonical	ARHGAP29	ENSG00000137962.13	protein_coding
	0.01	2.67	NYIRITSEI	9		0.0679	Canonical	DHX32	ENSG00000089876.11	protein_coding	Y
	0.01	2.05	RYMSINTHL	9		0.0125	Canonical	CSNK1G1	ENSG00000169118.18	protein_coding	Y
	0.01	2.05	RYMSINTHL	9		0.0125	Canonical	CSNK1G3	ENSG00000151292.17	protein_coding	Y
	0.01	2.05	RYMSINTHL	9		0.0125	Canonical	CSNK1G2	ENSG00000133275.16	protein_coding	Y
	PF		VYTSKLVRL	9		0.0176	Canonical	PLXNA4	ENSG00000221866.9	protein_coding
	0.01	2.05	RYMSINTHL	9		0.0125	Canonical	AC087632.1	ENSG00000259316.11	protein_coding	Y
	PF		KYFALPHKI	9		0.0077	Canonical	TUT7	ENSG00000083223.18	protein_coding
	PF		QYSDINNRW	9		0.045	Canonical	SPTBN2	ENSG00000173898.13	protein_coding
	0.01	1.99	VMPKKVFKI	9		0.1921	Canonical	XYLT1	ENSG00000103489.11	protein_coding	Y
	PF		YYDKAFDRI	9		0.1561	Canonical	EIF3D	ENSG00000100353.18	protein_coding
	0.01	1.85	QYLELAHSL	9		0.0247	Canonical	TONSL	ENSG00000160949.17	protein_coding	Y
	PF		VYTDRFHLI	9		0.0058	Canonical	HEATR5A	ENSG00000129493.15	protein_coding
	0.01	2.47	EMEEKYYRF	9		0.6476	Canonical	CHD3	ENSG00000170004.16	protein_coding	Y
	0.01	1.89	VFTPVVQRI	9		0.0835	Canonical	CMIP	ENSG00000153815.16	protein_coding	Y
	0.01	2.09	IFKTLSSKF	9		0.1401	Canonical	ATXN2L	ENSG00000168488.18	protein_coding	Y
	0.01	2.33	LYHDIFSRL	9		0.0241	Canonical	NFE2L3	ENSG00000050344.9	protein_coding	Y
	PF		YYASIAKAF	9		0.0146	Canonical	ACADM	ENSG00000117054.13	protein_coding
	0.01	2.33	LYHDIFSRL	9		0.0241	Canonical	NFE2L3P1	ENSG00000267497.1	processed_pseudogene	Y
	0.01	3.46	KYVPAIAHL	9		0.0082	Canonical	CPVL	ENSG00000106066.15	protein_coding	Y
	PF		AYNRIVDAL	9		0.2361	Canonical	FNIP1	ENSG00000217128.12	protein_coding
	0.01	1.8	LYQHAVQYF	9		0.0042	Canonical	VPS4B	ENSG00000119541.10	protein_coding	Y
	PF		VYVAALKTL	9		0.0378	Canonical	MAP3K1	ENSG00000095015.6	protein_coding
	PF		RYKATGLHF	9		0.0248	Canonical	IQGAP1	ENSG00000140575.13	protein_coding
	0.01	2.22	EYLGKLVRF	9		0.0105	Canonical	RSAD2	ENSG00000134321.12	protein_coding	Y
	0.01	1.74	KYAPRFNGF	9		0.0055	Canonical	USP32	ENSG00000170832.13	protein_coding	Y
	0.01	1.74	KYAPRFNGF	9		0.0055	Canonical	AC053481.2	ENSG00000263887.7	transcribed_unprocessed_pseudogene	Y
	PF		YHKLKHFKF	9		0.5392	Canonical	CCDC82	ENSG00000149231.14	protein_coding
	0.01	2.09	YYTRLGNDF	9		0.1076	Canonical	AC245033.1	ENSG00000260836.2	protein_coding	Y
	0.01	2.09	YYTRLGNDF	9		0.1076	Canonical	RPS17	ENSG00000182774.13	protein_coding	Y
	0.01	2.09	YYTRLGNDF	9		0.1076	Canonical	AL451050.1	ENSG00000213068.3	processed_pseudogene	Y
	0.01	1.81	RYASINTHL	9		0.0187	Canonical	CSNK1D	ENSG00000141551.14	protein_coding	Y
	0.01	1.77	EFLTKTAKF	9		0.1952	Canonical	PPP4R3B	ENSG00000275052.5	protein_coding	Y
	0.01	1.77	EFLTKTAKF	9		0.1952	Canonical	PPP4R3A	ENSG00000100796.17	protein_coding	Y
	0.01	1.81	RYASINTHL	9		0.0187	Canonical	CSNK1E	ENSG00000213923.12	protein_coding	Y
	0.01	1.81	RYASINTHL	9		0.0187	Canonical	TPTEP2-CSNK1E	ENSG00000283900.1	protein_coding	Y
	0.01	2.51	DYMKTTSNF	9		0.0268	Canonical	NEMF	ENSG00000165525.18	protein_coding	Y
	0.01	2.42	IYTNLNQKI	9		0.0318	Canonical	EXOC6B	ENSG00000144036.15	protein_coding	Y
	0.01	2.46	SYGSVFKAI	9		0.13	Canonical	STK3	ENSG00000104375.17	protein_coding	Y
	0.05	1.4	VLPGHFNTF	9		0.0479	Canonical	MBLAC2	ENSG00000176055.10	protein_coding	Y
	0.01	2	EYAKIEETM	9		0.2503	Canonical	CADPS2	ENSG00000081803.16	protein_coding	Y
	0.01	1.66	AYLHTTTTF	9		0.0037	Canonical	ABCC3	ENSG00000108846.16	protein_coding	Y
	0.01	1.68	RYHLVQQLF	9		0.0042	Canonical	FANCF	ENSG00000183161.5	protein_coding	Y
	0.05	1.41	RYTAILNQI	9		0.042	Canonical	COL14A1	ENSG00000187955.12	protein_coding	Y
	0.01	1.53	VGARIYHTI	9		1.6523	Canonical	MGST1	ENSG00000008394.13	protein_coding	Y
	0.01	2.19	NQSQGYNQW	9		1.3725	Canonical	HNRNPU	ENSG00000153187.20	protein_coding	Y
	0.01	2.19	NQSQGYNQW	9		1.3725	Canonical	HNRNPUP1	ENSG00000259051.1	processed_pseudogene	Y
	PF		YYDPHQATF	9		0.0029	Canonical	PCNX1	ENSG00000100731.15	protein_coding
	0.01	2.2	TYDSVTDKF	9		0.046	Canonical	USP34	ENSG00000115464.14	protein_coding	Y
	0.01	2.42	KYLAHLEQL	9		0.0191	Canonical	GBP2	ENSG00000162645.13	protein_coding	Y
	0.01	1.25	YYQSSVQYL	9		0.0066	Canonical	DNAAF5	ENSG00000164818.16	protein_coding	Y
	0.05	1.92	EYIHHLEVI	9		0.156	Canonical	PCNT	ENSG00000160299.17	protein_coding	Y
	0.05	1.48	AYVPGFAHI	9		0.0171	Canonical	CUEDC2	ENSG00000107874.11	protein_coding	Y
	PF		VYTSVQAQY	9		0.3051	Canonical	AAK1	ENSG00000115977.19	protein_coding
	0.01	1.6	NQEKHFYTF	9		0.3726	Canonical	DIS3	ENSG00000083520.15	protein_coding	Y
	PF		YYVRAVLHL	9		0.0136	Canonical	CYBA	ENSG00000051523.11	protein_coding
	0.05	2.17	EYQKVGQSF	9		0.0229	Canonical	SNX18	ENSG00000178996.14	protein_coding	Y
	PF		KYVKVFDKF	9		0.0037	Canonical	ZNF107	ENSG00000196247.11	protein_coding
	PF		VFTGVVTKL	9		0.2595	Canonical	CCAR1	ENSG00000060339.14	protein_coding
	0.01	1.83	NYGLRTFLF	9		0.0198	Canonical	DOCK6	ENSG00000130158.14	protein_coding	Y
	PF		EYNSDLHQF	9		0.0152	Canonical	BUB1	ENSG00000169679.15	protein_coding
	0.05	1.42	YLKVKGNVF	9		1.6458	Canonical	AC136632.1	ENSG00000218227.3	transcribed_processed_pseudogene	N
	0.05	1.42	YLKVKGNVF	9		1.6458	Canonical	RPL19	ENSG00000108298.11	protein_coding	N
	0.05	1.42	YLKVKGNVF	9		1.6458	Canonical	FAM153CP	ENSG00000204677.12	protein_coding	N
	0.05	1.42	YLKVKGNVF	9		1.6458	Canonical	AC133435.1	ENSG00000233597.3	processed_pseudogene	N
	0.05	1.42	YLKVKGNVF	9		1.6458	Canonical	AL161742.1	ENSG00000177452.7	processed_pseudogene	N
	0.05	1.42	YLKVKGNVF	9		1.6458	Canonical	AC097358.1	ENSG00000229863.1	processed_pseudogene	N
	0.05	1.42	YLKVKGNVF	9		1.6458	Canonical	AC021016.1	ENSG00000230580.1	processed_pseudogene	N
	0.05	1.42	YLKVKGNVF	9		1.6458	Canonical	RPL19P20	ENSG00000229168.4	processed_pseudogene	N
	0.05	1.42	YLKVKGNVF	9		1.6458	Canonical	AC068137.1	ENSG00000226915.1	processed_pseudogene	N
	0.05	1.42	YLKVKGNVF	9		1.6458	Canonical	RPL19P16	ENSG00000236762.1	processed_pseudogene	N
	0.05	1.42	YLKVKGNVF	9		1.6458	Canonical	AC095041.1	ENSG00000241877.1	processed_pseudogene	N
	PF		IYTEVRELV	9		0.2459	Canonical	CKAP4	ENSG00000136026.14	protein_coding
	0.01	2.18	QYLLHSPEL	9		0.0996	Canonical	ATOH1	ENSG00000172238.4	protein_coding	Y
	PF		RYDPHLNRW	9		0.0156	Canonical	KLHL26	ENSG00000167487.12	protein_coding
	0.01	2.03	PYAQQLRVF	9		0.0962	Canonical	DHX33	ENSG00000005100.13	protein_coding	Y
	0.05	1.82	EYHKWRTYF	9		0.0596	Canonical	MLXIP	ENSG00000175727.14	protein_coding	Y
	0.01	2.15	QYEKLFHKW	9		0.0168	Canonical	ORC2	ENSG00000115942.9	protein_coding	Y
	0.05	2.07	QYGSALAHF	9		0.0071	Canonical	PAQR8	ENSG00000170915.9	protein_coding	Y
	0.01	1.36	YYYYGPPHM	9		0.0498	Canonical	SYNCRIP	ENSG00000135316.17	protein_coding	Y
	0.01	2.37	QYLSRFESW	9		0.0107	Canonical	BHLHE41	ENSG00000123095.6	protein_coding	Y
	0.01	1.66	VYTKANPTF	9		0.0032	Canonical	SPRED2	ENSG00000198369.10	protein_coding	Y
	0.01	1.73	NYPDEFTKL	9		0.0647	Canonical	NF1	ENSG00000196712.17	protein_coding	Y
	PF		KYMDRAENI	9		0.0357	Canonical	MITD1	ENSG00000158411.11	protein_coding
	0.01	1.87	QYIDVSHVF	9		0.0023	Canonical	RFX2	ENSG00000087903.13	protein_coding	Y
	0.01	1.89	YYTSRPALF	9		0.0046	Canonical	CDIPT	ENSG00000103502.14	protein_coding	Y
	0.01	2.5	QYIEELQKF	9		0.002	Canonical	RALGPS2	ENSG00000116191.17	protein_coding	Y
	0.01	2.34	RVQDKYFHI	9		0.8632	Canonical	ABLIM2	ENSG00000163995.20	protein_coding	Y
	0.05	2.41	VYQKLLERM	9		0.0375	Canonical	TGFBI	ENSG00000120708.17	protein_coding	Y
	PF		PYKVTQDEL	9		0.5503	Canonical	NCL	ENSG00000115053.16	protein_coding
	0.01	1.64	IYVPSSYHL	9		0.0037	Canonical	SLF2	ENSG00000119906.13	protein_coding	Y
	PF		RAARYYYYW	9		1.0313	Canonical	FRMD6	ENSG00000139926.15	protein_coding
	PF		MYIFKQPHF	9		0.0055	Canonical	PHYHD1	ENSG00000175287.19	protein_coding
	PF		IYVRHSNLM	9		0.1577	Canonical	EPB41L2	ENSG00000079819.19	protein_coding
	0.01	1.93	NYSSAVQKF	9		0.0051	Canonical	OPHN1	ENSG00000079482.13	protein_coding	Y
	0.01	1.92	PLPKETWKF	9		0.2084	Canonical	AOAH	ENSG00000136250.11	protein_coding	Y
	0.01	2.8	IYTSSVNRL	9		0.0257	Canonical	COPB2	ENSG00000184432.10	protein_coding	Y
	0.01	1.6	LYIGTHCEI	9		0.3781	Canonical	FAT1	ENSG00000083857.14	protein_coding	Y
	0.01	2.32	NYIEKVVAI	9		0.0695	Canonical	ABI1	ENSG00000136754.17	protein_coding	Y
	0.01	2.17	VMAPRTLLL	9		0.4197	Canonical	HLA-A	ENSG00000206503.13	protein_coding	Y
	0.01	2.17	VMAPRTLLL	9		0.4197	Canonical	HLA-L	ENSG00000243753.5	transcribed_unprocessed_pseudogene	Y
	PF		YYTQKLHLL	9		0.009	Canonical	KCNK5	ENSG00000164626.9	protein_coding
	0.01	1.89	NYVATTHMI	9		0.0998	Canonical	NR4A2	ENSG00000153234.14	protein_coding	Y
	0.01	2.17	VMAPRTLLL	9		0.4197	Canonical	HLA-V	ENSG00000181126.13	transcribed_unprocessed_pseudogene	Y
	PF		VWNPRTHQF	9		0.0082	Canonical	ATP1B2	ENSG00000129244.9	protein_coding
	0.01	1.78	VYANGIRNI	9		0.0441	Canonical	2020-03-06	ENSG00000145495.16	protein_coding	Y
	0.01	1.68	VYENKYVKF	9		0.0065	Canonical	PYM1	ENSG00000170473.17	protein_coding	Y
	0.05	1.3	SYLKSANSW	9		0.0289	Canonical	KIAA0513	ENSG00000135709.12	protein_coding	Y
	0.01	2.24	NYTEIREKL	9		0.1625	Canonical	FAM193B	ENSG00000146067.16	protein_coding	Y
	0.01	1.69	QYLDRAEKL	9		0.0652	Canonical	VPS4A	ENSG00000132612.16	protein_coding	Y
	0.01	1.69	QYLDRAEKL	9		0.0652	Canonical	AC026464.4	ENSG00000260914.3	protein_coding	Y
	0.01	2.03	KYHTHLLQF	9		0.0056	Canonical	ABCD1	ENSG00000101986.12	protein_coding	Y
	0.05	1.82	RYPVILRRF	9		0.0073	Canonical	OPLAH	ENSG00000178814.17	protein_coding	Y
	0.01	2.03	KYHTHLLQF	9		0.0056	Canonical	ABCD2	ENSG00000173208.4	protein_coding	Y
	0.05	1.59	NYGDQVQHF	9		0.0076	Canonical	GRAP	ENSG00000154016.13	protein_coding	Y
	0.01	1.78	TYLDKVENI	9		0.0131	Canonical	IFIT1	ENSG00000185745.10	protein_coding	Y
	0.01	1.93	TYIDKSTQL	9		0.0225	Canonical	C10orf88	ENSG00000119965.13	protein_coding	Y
	0.01	1.65	QYNTYPIKL	9		0.056	Canonical	SEC61A1	ENSG00000058262.10	protein_coding	Y
	PF		KYLETYLNL	9		0.0089	Canonical	PON2	ENSG00000105854.13	protein_coding
	0.01	1.78	TYLDKVENI	9		0.0131	Canonical	IFIT1P1	ENSG00000215515.2	processed_pseudogene	Y
	0.01	1.9	SYAQHIASI	9		0.0455	Canonical	MTCH2	ENSG00000109919.10	protein_coding	Y
	0.01	1.84	NYIKRNWRI	9		0.0605	Canonical	CSE1L	ENSG00000124207.17	protein_coding	Y
	PF		VFTSVRQKI	9		0.4151	Canonical	SMARCA4	ENSG00000127616.18	protein_coding
	PF		QYTVFHSLI	9		0.1905	Canonical	GAK	ENSG00000178950.17	protein_coding
	PF		RYGRIVIYL	9		0.0491	Canonical	SLC22A3	ENSG00000146477.6	protein_coding
	0.01	2.27	VYHHLVETL	9		0.0103	Canonical	GGT5	ENSG00000099998.17	protein_coding	Y
	0.01	2.01	VYKPAQNSW	9		0.0235	Canonical	KBTBD7	ENSG00000120696.8	protein_coding	Y
	0.01	2.01	VYKPAQNSW	9		0.0235	Canonical	KBTBD6	ENSG00000165572.7	protein_coding	Y
	PF		VYKKYPNVF	9		0.0139	Canonical	AHCYL1	ENSG00000168710.18	protein_coding
	0.01	1.96	AYTRAVMHF	9		0.005	Canonical	ATR	ENSG00000175054.16	protein_coding	Y
	PF		KYSSNLGNF	9		0.0302	Canonical	API5	ENSG00000166181.13	protein_coding
	0.01	2.29	YYHARVYEF	9		0.0021	Canonical	PSMD3	ENSG00000108344.15	protein_coding	Y
	0.01	2	TYPENWRAF	9		0.0143	Canonical	AP002990.1	ENSG00000255508.7	protein_coding	Y
	0.01	2	TYPENWRAF	9		0.0143	Canonical	EEF1G	ENSG00000254772.10	protein_coding	Y
	0.01	2	TYPENWRAF	9		0.0143	Canonical	AC008038.1	ENSG00000283041.1	processed_pseudogene	Y
	0.01	2	TYPENWRAF	9		0.0143	Canonical	CHCHD3	ENSG00000106554.13	protein_coding	Y
	0.01	2	TYPENWRAF	9		0.0143	Canonical	EEF1GP1	ENSG00000186676.3	processed_pseudogene	Y
	0.01	1.82	VYLIEHPSL	9		0.0199	Canonical	ASPA	ENSG00000108381.11	protein_coding	Y
	PF		TWTPSALKF	9		0.0369	Canonical	COL6A2	ENSG00000142173.15	protein_coding
	PF		QYLAAVRKF	9		0.0095	Canonical	GNPAT	ENSG00000116906.13	protein_coding
	0.01	1.88	QYLRNPPKL	9		0.0232	Canonical	SHC1	ENSG00000160691.18	protein_coding	Y
	0.01	1.76	NYNEKIYEL	9		0.0269	Canonical	UFD1	ENSG00000070010.19	protein_coding	Y
	PF		RYVVTSVSW	9		0.0448	Canonical	EIF3B	ENSG00000106263.18	protein_coding
	0.01	2.12	SFITHSLKF	9		0.0394	Canonical	CEP192	ENSG00000101639.18	protein_coding	Y
	0.01	2.54	RFLVKSHYI	9		0.2925	Canonical	RFX7	ENSG00000181827.14	protein_coding	Y
	PF		YFAERVTSL	9		0.2765	Canonical	AL928654.3	ENSG00000257341.5	protein_coding
	PF		YFAERVTSL	9		0.2765	Canonical	CRIP1	ENSG00000213145.9	protein_coding
	PF		YFAERVTSL	9		0.2765	Canonical	CRIP1P4	ENSG00000182351.7	processed_pseudogene
	PF		YFAERVTSL	9		0.2765	Canonical	CRIP1P2	ENSG00000238225.1	processed_pseudogene
	0.05	1.51	YFPPKGYAF	9		0.0162	Canonical	CPEB2	ENSG00000137449.15	protein_coding	Y
	0.01	1.79	MYLGITPSI	9		0.0492	Canonical	TRAPPC3	ENSG00000054116.12	protein_coding	Y
	PF		NYVPVNHFW	9		0.0225	Canonical	IFT140	ENSG00000187535.14	protein_coding
	0.01	1.42	FMYDRPLRL	9	1xOxidation [M2]	0.6041	Canonical	COL6A3	ENSG00000163359.15	protein_coding	Y
	0.05	1.51	YFPPKGYAF	9		0.0162	Canonical	CPEB4	ENSG00000113742.14	protein_coding	Y
	PF		QYSDVNNRW	9		0.0607	Canonical	SPTBN1	ENSG00000115306.16	protein_coding
	0.05	1.51	YFPPKGYAF	9		0.0162	Canonical	CPEB3	ENSG00000107864.15	protein_coding	Y
	PF		TYKDTHRKF	9		0.0624	Canonical	IFT88	ENSG00000032742.17	protein_coding
	0.01	1.91	VFHPRQELI	9		0.2187	Canonical	COPA	ENSG00000122218.16	protein_coding	Y
	0.01	1.21	IYKFLTPYL	9		0.0674	Canonical	TTC30B	ENSG00000196659.9	protein_coding	Y
	PF		RMNPNSPSI	9		1.2514	Canonical	ERH	ENSG00000100632.11	protein_coding
	PF		RYDSVINRL	9		0.0402	Canonical	PCF11	ENSG00000165494.11	protein_coding
	0.01	2.51	VYPDGIRHI	9		0.0262	Canonical	SF3B3	ENSG00000189091.13	protein_coding	Y
	0.01	1.94	LYQEILAQL	9		0.0307	Canonical	URB1	ENSG00000142207.7	protein_coding	Y
	0.01	1.98	RYQEMIQKL	9		0.0031	Canonical	SCLT1	ENSG00000151466.12	protein_coding	Y
	0.01	1.67	RYAEEVGIF	9		0.0369	Canonical	NANS	ENSG00000095380.11	protein_coding	Y
	0.01	1.13	YYQKAIWEL	9		0.007	Canonical	BTNL8	ENSG00000113303.11	protein_coding	Y
	0.01	1.96	MYQTKAVII	9		0.1899	Canonical	TMBIM1	ENSG00000135926.15	protein_coding	Y
	PF		NYAFLHRTL	9		0.1405	Canonical	APOBEC3B	ENSG00000179750.16	protein_coding
	PF		IYTRILSRF	9		0.0063	Canonical	FAN1	ENSG00000198690.10	protein_coding
	PF		NYAFLHRTL	9		0.1405	Canonical	APOBEC3F	ENSG00000128394.17	protein_coding
	0.01	1.7	VYTPVLEHL	9		0.004	Canonical	PRKDC	ENSG00000253729.7	protein_coding	Y
	0.01	2.24	RYALIMHKL	9	1xOxidation [M6]	0.0111	Canonical	ZBTB11	ENSG00000066422.4	protein_coding	Y
	0.01	2.05	NYIHVGAQL	9		0.1291	Canonical	MYO1D	ENSG00000176658.17	protein_coding	Y
	0.01	2.47	VYIKHPVSL	9		0.0045	Canonical	PSMD8	ENSG00000099341.11	protein_coding	Y
	0.01	1.96	QYIDKLNAL	9		0.0749	Canonical	CCDC88C	ENSG00000015133.19	protein_coding	Y
	0.01	2.79	VYISEHEHF	9		0.0015	Canonical	CLPTM1	ENSG00000104853.16	protein_coding	Y
	0.01	1.97	VYTGIDHHW	9		0.018	Canonical	DCAF13	ENSG00000164934.14	protein_coding	Y
	0.01	1.73	NYMKFKAKF	9		0.0115	Canonical	CASP8AP2	ENSG00000118412.12	protein_coding	Y
	0.01	1.97	VYTGIDHHW	9		0.018	Canonical	DCAF13P1	ENSG00000242562.1	processed_pseudogene	Y
	0.01	1.88	NYVKKFQSF	9		0.0036	Canonical	FRG1	ENSG00000109536.12	protein_coding	Y
	0.01	1.68	LYVVDLKKF	9		0.0963	Canonical	UGGT1	ENSG00000136731.12	protein_coding	Y
	0.01	1.68	LYVVDLKKF	9		0.0963	Canonical	UGGT2	ENSG00000102595.20	protein_coding	Y
	0.01	1.88	NYVKKFQSF	9		0.0036	Canonical	FRG1CP	ENSG00000282826.2	transcribed_unprocessed_pseudogene	Y
	0.01	1.88	NYVKKFQSF	9		0.0036	Canonical	FRG1BP	ENSG00000149531.15	unprocessed_pseudogene	Y
	0.01	1.88	NYVKKFQSF	9		0.0036	Canonical	FRG1JP	ENSG00000215548.2	unprocessed_pseudogene	Y
	0.01	1.88	NYVKKFQSF	9		0.0036	Canonical	FRG1KP	ENSG00000280286.1	unprocessed_pseudogene	Y
	0.01	1.92	YFKRYQVKF	9		0.0772	Canonical	RPL5	ENSG00000122406.14	protein_coding	Y
	0.01	1.92	YFKRYQVKF	9		0.0772	Canonical	RPL5P30	ENSG00000243431.1	processed_pseudogene	Y
	0.01	1.92	YFKRYQVKF	9		0.0772	Canonical	RPL5P9	ENSG00000236330.1	processed_pseudogene	Y
	PF		RQPYIWLTI	9		0.7481	Canonical	ATP8B1	ENSG00000081923.14	protein_coding
	0.01	1.92	YFKRYQVKF	9		0.0772	Canonical	RPL5P24	ENSG00000244052.1	processed_pseudogene	Y
	0.01	1.92	YFKRYQVKF	9		0.0772	Canonical	RPL5P1	ENSG00000241061.3	processed_pseudogene	Y
	0.01	1.92	YFKRYQVKF	9		0.0772	Canonical	RPL5P18	ENSG00000220744.1	processed_pseudogene	Y
	0.01	2.04	VYVKHNISF	9		0.0039	Canonical	AP3M2	ENSG00000070718.12	protein_coding	Y
	0.01	2.59	VYVKHSISF	9		0.0024	Canonical	AP3M1	ENSG00000185009.12	protein_coding	Y
	0.01	2.19	VYVYGVDRF	9		0.0174	Canonical	SLC6A19	ENSG00000174358.16	protein_coding	Y
	PF		NYTPYKYNL	9		0.0728	Canonical	HGD	ENSG00000113924.12	protein_coding
	0.01	2.43	QYQQIISRL	9		0.0246	Canonical	PPP1R13L	ENSG00000104881.16	protein_coding	Y
	0.01	3.03	RYMEVSGNL	9		0.1071	Canonical	SF3A3	ENSG00000183431.12	protein_coding	Y
	0.01	3.03	RYMEVSGNL	9		0.1071	Canonical	SF3A3P1	ENSG00000230568.1	processed_pseudogene	Y
	0.01	1.93	RYVPRASYF	9		0.0054	Canonical	CCND3	ENSG00000112576.12	protein_coding	Y
	PF		RYYGNISRF	9		0.0039	Canonical	EHMT2	ENSG00000204371.11	protein_coding
	0.01	2.03	RYMDAWNTV	9		0.0683	Canonical	TIMM13	ENSG00000099800.8	protein_coding	Y
	0.01	1.7	SFKQRSDLF	9		0.2572	Canonical	ZNF394	ENSG00000160908.15	protein_coding	Y
	0.01	1.12	SYSDPPLKF	9		0.0042	Canonical	HNRNPF	ENSG00000169813.16	protein_coding	Y
	PF		RQLEVLQSI	9		1.1523	Canonical	CCNB2	ENSG00000157456.8	protein_coding
	0.01	2.23	YYQDTPKQI	9		0.0342	Canonical	NOP16	ENSG00000048162.20	protein_coding	Y
	0.01	2.37	RYQTQPVTL	9		0.0114	Canonical	SVIL	ENSG00000197321.14	protein_coding	Y
	0.01	1.37	RYTERVDYL	9		0.0691	Canonical	USP13	ENSG00000058056.9	protein_coding	Y
	0.05	1.35	RYMVHLLEL	9		0.0198	Canonical	HAUS2	ENSG00000137814.11	protein_coding	Y
	0.01	2.13	FYISPVNKL	9		0.0189	Canonical	AVL9	ENSG00000105778.19	protein_coding	Y
	PF		SYVKGIYSF	9		0.0021	Canonical	TTC38	ENSG00000075234.17	protein_coding
	0.01	1.29	SYVQTLVYI	9		0.0952	Canonical	AL669918.1	ENSG00000250264.1	protein_coding	Y
	0.01	1.29	SYVQTLVYI	9		0.0952	Canonical	TAP2	ENSG00000204267.15	protein_coding	Y
	0.01	2.52	FYTAYLQRL	9		0.1263	Canonical	QSOX1	ENSG00000116260.17	protein_coding	Y
	0.05	1.89	KYFDNSQSL	9		0.0153	Canonical	TTC17	ENSG00000052841.15	protein_coding	Y
	0.01	1.93	YYRGNYMTF	9		0.0053	Canonical	ABCF1	ENSG00000204574.13	protein_coding	Y
	0.01	1.75	SYVNHLYVI	9		0.0424	Canonical	RAPGEF5	ENSG00000136237.19	protein_coding	Y
	0.01	1.65	RYQRLYVKF	9		0.0042	Canonical	PRR12	ENSG00000126464.14	protein_coding	Y
	0.01	1.88	KYGDFNKEV	9		0.7308	Canonical	MSN	ENSG00000147065.17	protein_coding	Y
	0.01	2.2	KYGDILHVI	9		0.0113	Canonical	DLG2	ENSG00000150672.17	protein_coding	Y
	0.01	2.05	SYLHEPAVL	9		0.1034	Canonical	MYO5A	ENSG00000197535.14	protein_coding	Y
	0.01	2.05	SYLHEPAVL	9		0.1034	Canonical	MYO5B	ENSG00000167306.20	protein_coding	Y
	0.01	2.05	SYLHEPAVL	9		0.1034	Canonical	MYO5C	ENSG00000128833.13	protein_coding	Y
	PF		SYLKHSKAF	9		0.044	Canonical	HES5	ENSG00000197921.6	protein_coding
	PF		KYLKEVLRI	9		0.0137	Canonical	CHKA	ENSG00000110721.12	protein_coding
	PF		KYIQGLKRL	9		0.0671	Canonical	PRPF18	ENSG00000165630.14	protein_coding
	PF		HYTQKSLSL	9		0.1738	Canonical	IGHGP	ENSG00000253755.1	IG_C_pseudogene
	0.01	1.12	LYTEAIKFF	9		0.0182	Canonical	CLEC16A	ENSG00000038532.16	protein_coding	Y
	0.01	2.13	TGPTRFFLF	9		0.4881	Canonical	GPRC5A	ENSG00000013588.8	protein_coding	Y
	0.01	1.76	VYIKHLRDI	9		0.1681	Canonical	SPATA13	ENSG00000182957.16	protein_coding	Y
	PF		HYTQKSLSL	9		0.1738	Canonical	IGHG1	ENSG00000211896.7	IG_C_gene
	0.01	1.76	VYIKHLRDI	9		0.1681	Canonical	AL359736.1	ENSG00000273167.1	protein_coding	Y
	PF		HYTQKSLSL	9		0.1738	Canonical	IGHG4	ENSG00000211892.4	IG_C_gene
	PF		HYTQKSLSL	9		0.1738	Canonical	IGHG2	ENSG00000211893.4	IG_C_gene
	0.05	2.25	KFSPRPLKF	9		0.016	Canonical	BRWD1	ENSG00000185658.13	protein_coding	Y
	0.01	1.97	KFYTDPSYF	9		0.0649	Canonical	WASF3	ENSG00000132970.13	protein_coding	Y
	0.01	1.97	KFYTDPSYF	9		0.0649	Canonical	WASF2	ENSG00000158195.11	protein_coding	Y
	0.01	2.41	KYGDPGSLF	9		0.0082	Canonical	ITGA6	ENSG00000091409.15	protein_coding	Y
	0.01	2.64	KYLESVKPF	9		0.022	Canonical	CROT	ENSG00000005469.11	protein_coding	Y
	0.01	1.67	YYSPHGHIL	9		0.0196	Canonical	EIF2A	ENSG00000144895.12	protein_coding	Y
	0.01	2.02	EYGVIRDVL	9		0.9361	Canonical	H6PD	ENSG00000049239.12	protein_coding	Y
	PF		KYLLDSPSL	9		0.0916	Canonical	SLC35C1	ENSG00000181830.8	protein_coding
	0.01	2.15	HYLDTTTLI	9		0.0446	Canonical	CRK	ENSG00000167193.8	protein_coding	Y
	0.01	2.15	HYLDTTTLI	9		0.0446	Canonical	CRKL	ENSG00000099942.13	protein_coding	Y
	0.01	3.17	HYLNHWNHF	9		0.0043	Canonical	FN3KRP	ENSG00000141560.15	protein_coding	Y
	0.01	2.34	EYLLKVNEI	9		0.151	Canonical	ASAP1	ENSG00000153317.15	protein_coding	Y
	0.01	2.53	KYIDKTIRV	9		0.0699	Canonical	LSM7	ENSG00000130332.15	protein_coding	Y
	0.01	2.34	EYLLKVNEI	9		0.151	Canonical	ASAP2	ENSG00000151693.11	protein_coding	Y
	0.01	2.42	EYTAKIALL	9		0.1702	Canonical	EZR	ENSG00000092820.18	protein_coding	Y
	0.01	1.65	YFHDRVASF	9		0.0479	Canonical	MIOS	ENSG00000164654.16	protein_coding	Y
	0.01	2.33	KYLEETNSL	9		0.0173	Canonical	L3MBTL3	ENSG00000198945.7	protein_coding	Y
	0.01	2.23	YYHKVVIRL	9		0.0137	Canonical	EP400	ENSG00000183495.13	protein_coding	Y
	PF		HYANIGKTL	9		0.1522	Canonical	RMDN2	ENSG00000115841.20	protein_coding
	0.01	1.89	KYHIVKQIF	9		0.0266	Canonical	HERC3	ENSG00000138641.18	protein_coding	Y
	0.01	1.89	KYHIVKQIF	9		0.0266	Canonical	AC098582.1	ENSG00000287542.1	protein_coding	Y
	0.01	1.84	YYQEYPMSI	9		0.0167	Canonical	SLC5A6	ENSG00000138074.15	protein_coding	Y
	0.01	1.68	WAPKPYHKF	9		0.3891	Canonical	TNIK	ENSG00000154310.17	protein_coding	Y
	0.01	1.68	WAPKPYHKF	9		0.3891	Canonical	MINK1	ENSG00000141503.17	protein_coding	Y
	PF		KFVETHPEF	9		0.0194	Canonical	ADA2	ENSG00000093072.18	protein_coding
	0.01	1.68	WAPKPYHKF	9		0.3891	Canonical	MAP4K4	ENSG00000071054.16	protein_coding	Y
	PF		SAVGKTTSF	9		1.8775	Canonical	MUC20	ENSG00000176945.17	protein_coding
	0.01	1.72	FYIHHPVHL	9		0.015	Canonical	ALMS1	ENSG00000116127.18	protein_coding	Y
	0.01	2.08	AYRRIFQKF	9		0.0178	Canonical	MYO1E	ENSG00000157483.8	protein_coding	Y
	0.01	1.51	LLPNHSYVF	9		0.2136	Canonical	ITGB4	ENSG00000132470.14	protein_coding	Y
	0.01	1.57	KYPLLLKEL	9		0.0749	Canonical	TIAM2	ENSG00000146426.18	protein_coding	Y
	PF		VYRVYVATF	9		0.039	Canonical	ENTPD4	ENSG00000197217.13	protein_coding
	0.01	1.57	KYPLLLKEL	9		0.0749	Canonical	PREX1	ENSG00000124126.14	protein_coding	Y
	PF		SAVGKTTSF	9		1.8775	Canonical	MUC20P1	ENSG00000224769.1	unprocessed_pseudogene
	PF		VYSPKSPSL	9		0.0138	Canonical	MGRN1	ENSG00000102858.13	protein_coding
	0.01	1.57	KYPLLLKEL	9		0.0749	Canonical	PREX2	ENSG00000046889.19	protein_coding	Y
	0.01	1.57	KYPLLLKEL	9		0.0749	Canonical	NET1	ENSG00000173848.19	protein_coding	Y
	0.01	2.8	KYQAVTATL	9		0.011	Canonical	RPL13A	ENSG00000142541.17	protein_coding	Y
	0.01	2.69	KYLDIPKML	9		0.0245	Canonical	ACTN3	ENSG00000248746.6	protein_coding	Y
	0.01	2.52	LYDPVISKL	9		0.0397	Canonical	MCRS1	ENSG00000187778.14	protein_coding	Y
	0.01	2.72	VYSHLKSVL	9		0.1811	Canonical	INTS11	ENSG00000127054.20	protein_coding	Y
	0.01	2.8	KYQAVTATL	9		0.011	Canonical	RPL13AP5	ENSG00000236552.2	processed_pseudogene	Y
	0.01	2.69	KYLDIPKML	9		0.0245	Canonical	ACTN1	ENSG00000072110.13	protein_coding	Y
	0.01	2.69	KYLDIPKML	9		0.0245	Canonical	ACTN4	ENSG00000130402.12	protein_coding	Y
	0.01	2.8	KYQAVTATL	9		0.011	Canonical	RPL13AP25	ENSG00000136149.6	processed_pseudogene	Y
	0.01	1.56	IYEPLHTHW	9		0.0168	Canonical	PAQR7	ENSG00000182749.5	protein_coding	Y
	PF		TYLIQHQRI	9		0.0324	Canonical	ZNF184	ENSG00000096654.15	protein_coding
	PF		RYEHIDHTF	9		0.0093	Canonical	CSF2RB	ENSG00000100368.14	protein_coding
	0.01	2	AYLVAHSFL	9		0.1774	Canonical	SLC44A3	ENSG00000143036.17	protein_coding	Y
	0.01	2.8	KYQAVTATL	9		0.011	Canonical	RPL13AP20	ENSG00000234498.3	processed_pseudogene	Y
	0.01	2.8	KYQAVTATL	9		0.011	Canonical	AC125807.1	ENSG00000234589.4	processed_pseudogene	Y
	0.01	1.62	AYNPVTHQL	9		0.0072	Canonical	CDON	ENSG00000064309.14	protein_coding	Y
	0.01	1.8	RYVDRVTEF	9		0.003	Canonical	CDK5RAP3	ENSG00000108465.15	protein_coding	Y
	0.01	2.8	KYQAVTATL	9		0.011	Canonical	RPL13AP	ENSG00000231301.1	processed_pseudogene	Y
	0.01	1.8	RYVDRVTEF	9		0.003	Canonical	AC018521.1	ENSG00000263798.2	lncRNA	Y
	0.01	1.8	RYVDRVTEF	9		0.003	Canonical	AL121723.1	ENSG00000224628.2	processed_pseudogene	Y
	0.01	2.8	KYQAVTATL	9		0.011	Canonical	RPL13AP3	ENSG00000177350.6	transcribed_processed_pseudogene	Y
	0.01	2.3	RYLHKPYLI	9		0.0075	Canonical	TTLL4	ENSG00000135912.11	protein_coding	Y
	0.01	2.33	TMLGKFYHF	9		0.0798	Canonical	IFT122	ENSG00000163913.11	protein_coding	Y
	0.01	2.69	RYVQQLQRL	9		0.0175	Canonical	MRPL43	ENSG00000055950.16	protein_coding	Y
	PF		EYLSTCSKL	9		0.3083	Canonical	ARID2	ENSG00000189079.17	protein_coding
	0.01	2.8	KYQAVTATL	9		0.011	Canonical	AC018523.1	ENSG00000255074.1	processed_pseudogene	Y
	0.01	2.8	KYQAVTATL	9		0.011	Canonical	RPL13AP19	ENSG00000228754.1	processed_pseudogene	Y
	0.01	1.53	YYSHVLQML	9		0.0221	Canonical	UBR4	ENSG00000127481.15	protein_coding	Y
	0.01	1.51	SYQPNENKF	9		0.0057	Canonical	FAM83B	ENSG00000168143.9	protein_coding	Y
	0.01	2.8	KYQAVTATL	9		0.011	Canonical	AC104212.2	ENSG00000241746.1	processed_pseudogene	Y
	0.05	2.22	RYNPENNTW	9		0.0171	Canonical	IVNS1ABP	ENSG00000116679.16	protein_coding	Y
	0.01	2.51	RYIHKLYDL	9		0.0667	Canonical	DOCK4	ENSG00000128512.22	protein_coding	Y
	0.01	2.11	EYLDRAEKL	9		0.1789	Canonical	VPS4B	ENSG00000119541.10	protein_coding	Y
	0.01	2.99	RYLHLAAKL	9		0.068	Canonical	DHX29	ENSG00000067248.10	protein_coding	Y
	0.01	2.06	EYIKGFQKL	9		0.0163	Canonical	DDX52	ENSG00000278053.5	protein_coding	Y
	0.01	1.58	LYMRIRDNW	9		0.1044	Canonical	SPTLC2	ENSG00000100596.6	protein_coding	Y
	PF		RYELVQYRW	9		0.0576	Canonical	UGGT2	ENSG00000102595.20	protein_coding
	0.01	1.58	LYMRIRDNW	9		0.1044	Canonical	SPTLC3	ENSG00000172296.13	protein_coding	Y
	0.05	1.93	KYPNVDARL	9		0.1143	Canonical	UGCG	ENSG00000148154.10	protein_coding	Y
	PF		KYVEKLEAL	9		0.0601	Canonical	PRUNE1	ENSG00000143363.17	protein_coding
	0.01	2.74	LYSSESHRF	9		0.0081	Canonical	MTMR6	ENSG00000139505.11	protein_coding	Y
	PF		FYQPKIQQF	9		0.0013	Canonical	FANCI	ENSG00000140525.17	protein_coding
	0.01	1.55	EYVSQHLVF	9		0.0353	Canonical	STRIP2	ENSG00000128578.10	protein_coding	Y
	0.01	2.41	RYMEHLEKI	9		0.0091	Canonical	KIAA0895	ENSG00000164542.12	protein_coding	Y
	PF		TYTSRLAII	9		0.2703	Canonical	PAN2	ENSG00000135473.15	protein_coding
	PF		IYSVNKEQL	9		0.1199	Canonical	XIAP	ENSG00000101966.12	protein_coding
	PF		IYSVNKEQL	9		0.1199	Canonical	XIAPP3	ENSG00000180152.3	processed_pseudogene
	PF		SYLTLHKRI	9		0.1538	Canonical	ZNF558	ENSG00000167785.9	protein_coding
	PF		SYLTLHKRI	9		0.1538	Canonical	AL390728.4	ENSG00000227671.4	transcribed_unprocessed_pseudogene
	0.01	2.11	RYCEHFNIL	9		0.1128	Canonical	CUL7	ENSG00000044090.8	protein_coding	Y
	PF		SYLTLHKRI	9		0.1538	Canonical	AC010329.5	ENSG00000280171.1	unprocessed_pseudogene
	PF		SYLTLHKRI	9		0.1538	Canonical	AC010329.2	ENSG00000269779.1	unprocessed_pseudogene
	0.01	2.53	LYQRAFQHL	9		0.0101	Canonical	PRKDC	ENSG00000253729.7	protein_coding	Y
	0.01	1.96	KYTEKLEEI	9		0.0509	Canonical	CEP41	ENSG00000106477.19	protein_coding	Y
	PF		SYAKKVALW	9		0.0115	Canonical	TIMM50	ENSG00000105197.11	protein_coding
	PF		RYPEIKEEL	9		0.0387	Canonical	SCNN1A	ENSG00000111319.13	protein_coding
	0.01	2.84	RYAWIKRQL	9		0.1506	Canonical	VPS53	ENSG00000141252.20	protein_coding	Y
	PF		EYGQVNHAL	9		0.2469	Canonical	TUBGCP2	ENSG00000130640.13	protein_coding
	PF		RYTNRVVTL	9		0.0165	Canonical	CDK9	ENSG00000136807.13	protein_coding
	0.01	1.84	IYIRYLYKL	9		0.0151	Canonical	DOCK5	ENSG00000147459.18	protein_coding	Y
	PF		YYSNLHQTF	9		0.0015	Canonical	METTL18	ENSG00000171806.12	protein_coding
	0.01	1.91	FFKDRHWLF	9		0.0655	Canonical	METTL2A	ENSG00000087995.15	protein_coding	Y
	0.01	1.91	FFKDRHWLF	9		0.0655	Canonical	METTL2B	ENSG00000165055.15	protein_coding	Y
	0.01	2.15	SYLIIHQRI	9		0.0195	Canonical	ZNF852	ENSG00000178917.16	protein_coding	Y
	0.01	1.39	SFYEHIITV	9		0.5208	Canonical	DCAF12	ENSG00000198876.13	protein_coding	Y
	0.05	1.48	PFSGKSFYL	9		0.5757	Canonical	DBF4B	ENSG00000161692.18	protein_coding	N
	0.01	2.15	SYLIIHQRI	9		0.0195	Canonical	ZNF397	ENSG00000186812.13	protein_coding	Y
	0.01	2.15	SYLIIHQRI	9		0.0195	Canonical	ZNF35	ENSG00000169981.11	protein_coding	Y
	0.01	2.21	IYSEMIHNL	9		0.0038	Canonical	FAM135A	ENSG00000082269.16	protein_coding	Y
	0.01	2.15	LYKDVRDLL	9		0.1634	Canonical	ANKZF1	ENSG00000163516.13	protein_coding	Y
	0.01	2.15	SYLIIHQRI	9		0.0195	Canonical	ZNF230	ENSG00000159882.13	protein_coding	Y
	0.01	2.15	SYLIIHQRI	9		0.0195	Canonical	AC093225.1	ENSG00000250860.1	processed_pseudogene	Y
	PF		TFISPQQRW	9		0.1284	Canonical	MGP	ENSG00000111341.9	protein_coding
	0.01	2.1	KYPDVIQEL	9		0.0037	Canonical	CNNM4	ENSG00000158158.12	protein_coding	Y
	PF		LYFDRKYLF	9		0.0041	Canonical	GLDN	ENSG00000186417.14	protein_coding
	0.05	1.21	AAAKVYSLF	9		0.7813	Canonical	LTBP2	ENSG00000119681.12	protein_coding	Y
	PF		LYTPEHHLI	9		0.0137	Canonical	TTI2	ENSG00000129696.12	protein_coding
	PF		SYLITSVEL	9		0.0755	Canonical	ACSL4	ENSG00000068366.19	protein_coding
	0.01	1.9	LYINKANIW	9		0.1042	Canonical	G2E3	ENSG00000092140.16	protein_coding	Y
	PF		YYLDHSILL	9		0.0158	Canonical	SLC41A2	ENSG00000136052.9	protein_coding
	0.05	1.85	EYLHNCSYF	9		0.083	Canonical	AHCTF1	ENSG00000153207.15	protein_coding	Y
	0.05	1.85	EYLHNCSYF	9		0.083	Canonical	AC009487.2	ENSG00000226121.2	processed_pseudogene	Y
	PF		KYDAAHFLI	9		0.0902	Canonical	ORMDL2	ENSG00000123353.10	protein_coding
	PF		VYVDKLAEL	9		0.0201	Canonical	HSPA4	ENSG00000170606.15	protein_coding
	0.01	2.1	IYKSMVQKF	9		0.003	Canonical	MYO1A	ENSG00000166866.13	protein_coding	Y
	PF		RHQEMFHYF	9		0.1457	Canonical	TRIM31	ENSG00000204616.11	protein_coding
	PF		QYSQHISLF	9		0.0067	Canonical	NOSTRIN	ENSG00000163072.15	protein_coding
	0.01	2.15	IYHPNVDKL	9		0.0092	Canonical	UBE2N	ENSG00000177889.10	protein_coding	Y
	0.01	1.53	AFIEKHWTF	9		0.0049	Canonical	KAT14	ENSG00000149474.13	protein_coding	Y
	PF		SYLIQAEKI	9		0.0845	Canonical	STIM2	ENSG00000109689.16	protein_coding
	0.01	2.15	IYHPNVDKL	9		0.0092	Canonical	AC024451.3	ENSG00000254065.1	processed_pseudogene	Y
	0.01	2.15	IYHPNVDKL	9		0.0092	Canonical	UBE2NL	ENSG00000276380.2	polymorphic_pseudogene	Y
	0.05	1.9	QYKGMFDTL	9		0.0671	Canonical	SLC25A32	ENSG00000164933.12	protein_coding	Y
	0.01	2.15	IYHPNVDKL	9		0.0092	Canonical	UBE2NP1	ENSG00000256385.1	processed_pseudogene	Y
	0.05	1.9	QYKGMFDTL	9		0.0671	Canonical	AC012213.5	ENSG00000285982.1	protein_coding	Y
	0.05	1.34	EYMAQHLVF	9	1xOxidation [M3]	0.0234	Canonical	STRIP1	ENSG00000143093.15	protein_coding	Y
	PF		SYELRYFQI	9		0.2125	Canonical	RPL22	ENSG00000116251.11	protein_coding
	PF		SYELRYFQI	9		0.2125	Canonical	RPL22P1	ENSG00000213178.3	processed_pseudogene
	PF		SYELRYFQI	9		0.2125	Canonical	RPL22P19	ENSG00000241129.3	transcribed_processed_pseudogene
	0.05	2.02	VYPVITARL	9		0.0213	Canonical	ZNF106	ENSG00000103994.17	protein_coding	Y
	0.01	1.95	LYSEVSHLL	9		0.0121	Canonical	RICTOR	ENSG00000164327.13	protein_coding	Y
	PF		IYPKIGDKL	9		0.0335	Canonical	EFNB1	ENSG00000090776.6	protein_coding
	0.01	1.82	HYHPIVQRF	9		0.0018	Canonical	NOC3L	ENSG00000173145.11	protein_coding	Y
	0.01	1.69	KQLAVYEEF	9		0.3738	Canonical	CNOT1	ENSG00000125107.18	protein_coding	Y
	PF		QYASLMHSF	9		0.004	Canonical	DYNLRB1	ENSG00000125971.16	protein_coding
	PF		QYASLMHSF	9		0.004	Canonical	ITCH	ENSG00000078747.15	protein_coding
	0.05	1.96	AFIQKSNLI	9		0.4932	Canonical	ZNF146	ENSG00000167635.11	protein_coding	Y
	PF		IYSKIKSVL	9		0.0722	Canonical	RETREG1	ENSG00000154153.13	protein_coding
	0.01	2.04	IFSNVRINL	9		0.4091	Canonical	CAV1	ENSG00000105974.12	protein_coding	Y
	0.01	1.66	RYTPAYAHL	9		0.0112	Canonical	PEX5	ENSG00000139197.10	protein_coding	Y
	0.05	1.36	IYNGKVTSI	9		0.0353	Canonical	DHX8	ENSG00000067596.11	protein_coding	Y
	PF		RYAIKILAI	9		0.0934	Canonical	TTC12	ENSG00000149292.16	protein_coding
	PF		AYLKAIVLF	9		0.0052	Canonical	NR2C2	ENSG00000177463.15	protein_coding
	PF		AYLKAIVLF	9		0.0052	Canonical	NR2C1	ENSG00000120798.17	protein_coding
	PF		VYITGKEVF	9		0.0159	Canonical	VPS13A	ENSG00000197969.14	protein_coding
	0.01	2.21	IYPSKWIARL	10		0.1424	Canonical	TSC2	ENSG00000103197.18	protein_coding	Y
	0.01	1.94	RYFDGNLEKL	10		0.1037	Canonical	ARIH1	ENSG00000166233.15	protein_coding	Y
	PF		IYGESISSHF	10		0.0138	Canonical	R3HCC1L	ENSG00000166024.13	protein_coding
	0.01	2.48	KYAELRDTI	9		0.0834	Canonical	MYO6	ENSG00000196586.15	protein_coding	Y
	0.01	2.05	EYVRVSEHF	9		0.0168	Canonical	ZC3HAV1	ENSG00000105939.13	protein_coding	Y
	0.01	2.02	VYEVPVETKF	10		0.0197	Canonical	SLC26A3	ENSG00000091138.12	protein_coding	Y
	0.01	2.48	AYHNSPAYL	9		0.1501	Canonical	SMARCE1	ENSG00000073584.20	protein_coding	Y
	0.01	2.48	AYHNSPAYL	9		0.1501	Canonical	AC073508.2	ENSG00000264058.2	protein_coding	Y
	0.01	1.74	SYSRRSFLI	9		0.0998	Canonical	ZSCAN9	ENSG00000137185.12	protein_coding	Y
	PF		RYGLLTNEI	9		0.1363	Canonical	DHX58	ENSG00000108771.13	protein_coding
	0.01	2.3	KYIQKPGLL	9		0.0721	Canonical	PAQR7	ENSG00000182749.5	protein_coding	Y
	0.01	2.03	GYAHLTHLL	9		0.0592	Canonical	HDAC6	ENSG00000094631.20	protein_coding	Y
	0.05	1.82	IYKHFSATL	9		0.0484	Canonical	DOCK5	ENSG00000147459.18	protein_coding	Y
	0.05	2.2	SYLAIHQRI	9		0.0141	Canonical	ZNF665	ENSG00000197497.11	protein_coding	Y
	PF		NYVANTNVF	9		0.0529	Canonical	PREX1	ENSG00000124126.14	protein_coding
	0.05	1.03	QYQQRAFGW	9		0.1825	Canonical	RTP4	ENSG00000136514.3	protein_coding	Y
	0.01	1.7	KYQKLLWTI	9		0.0115	Canonical	ARHGAP18	ENSG00000146376.11	protein_coding	Y
	PF		AFLVLHSRF	9		0.2231	Canonical	NHLRC3	ENSG00000188811.14	protein_coding
	PF		TYVKRLHLL	9		0.0079	Canonical	FGD3	ENSG00000127084.19	protein_coding
	0.01	1.53	EYCLKFTKL	9		0.2101	Canonical	SUPT7L	ENSG00000119760.16	protein_coding	Y
	0.01	2.46	RYTFKMHLL	9		0.0432	Canonical	ZNF335	ENSG00000198026.8	protein_coding	Y
	0.01	1.71	KYFSSKWSF	9		0.0072	Canonical	WDR45B	ENSG00000141580.16	protein_coding	Y
	PF		TQTLVREYF	9		1.5498	Canonical	AP002990.1	ENSG00000255508.7	protein_coding
	PF		TQTLVREYF	9		1.5498	Canonical	EEF1G	ENSG00000254772.10	protein_coding
	PF		TQTLVREYF	9		1.5498	Canonical	AC008038.1	ENSG00000283041.1	processed_pseudogene
	0.05	2.02	VYLKTALGL	9		0.1036	Canonical	KLHL23	ENSG00000213160.10	protein_coding	Y
	PF	1.58	YGSGHYITF	9		0.4981	Canonical	MUC2	ENSG00000198788.8	protein_coding
	0.05	1.49	TYAKGFGML	9		0.166	Canonical	UBE3A	ENSG00000114062.20	protein_coding	Y
	0.05	1.47	VYSRDPNYL	9		0.0572	Canonical	UBE3A	ENSG00000114062.20	protein_coding	Y
	PF		TYISKTIAL	9		0.0427	Canonical	EXOC3L2	ENSG00000283632.2	protein_coding
	0.01	2.3	KWLEKNLPTL	10		0.4161	Canonical	ERAP2	ENSG00000164308.16	protein_coding	Y
	PF		EYAKIFTTY	9		0.1445	Canonical	LPCAT2	ENSG00000087253.13	protein_coding
	0.01	2.4	MWKEGNRIHF	10		0.2743	Canonical	HSD17B4	ENSG00000133835.16	protein_coding	Y
	0.01	2.4	MWKEGNRIHF	10		0.2743	Canonical	AC018992.1	ENSG00000253336.1	processed_pseudogene	Y
	0.01	2.2	YYSHLEGARF	10		0.0982	Canonical	URB1	ENSG00000142207.7	protein_coding	Y
	0.01	1.95	HYMPPPYASL	10		0.0444	Canonical	RNF111	ENSG00000157450.15	protein_coding	Y
	0.01	2.43	IYADNQVMHF	10		0.0049	Canonical	POLE	ENSG00000177084.16	protein_coding	Y
	PF	0.92	HYDGSYSTF	9		0.0214	Canonical	A2M	ENSG00000175899.14	protein_coding
	0.01	1.59	VQPGQNFHMF	10		0.319	Canonical	PSMA5	ENSG00000143106.13	protein_coding	Y
	0.05	2.07	QYLKMLQKL	9		0.015	Canonical	NRDC	ENSG00000078618.21	protein_coding	Y
	0.01	2.73	KYVEVFHKI	9		0.002	Canonical	ZNF117	ENSG00000152926.14	protein_coding	Y
	0.01	1.8	NYKDLNGNVF	10		0.2807	Canonical	SSR1	ENSG00000124783.14	protein_coding	Y
	0.01	2.2	AYLESRNYI	9		0.1653	Canonical	FRK	ENSG00000111816.8	protein_coding	Y
	0.01	2.33	VMSQALKATF	10	1xOxidation [M2]	1.5148	Canonical	ETS2	ENSG00000157557.13	protein_coding	Y
	0.01	2.8	SYMLVNENRF	10		0.0604	Canonical	LDOC1	ENSG00000182195.8	protein_coding	Y
	PF		KYMTAVVKLF	10		0.0196	Canonical	CYBA	ENSG00000051523.11	protein_coding
	0.01	2.07	RYKGPGFEYF	10		0.0112	Canonical	RPUSD2	ENSG00000166133.18	protein_coding	Y
	0.01	2.08	VFHPSQDLVF	10		0.1296	Canonical	PRPF19	ENSG00000110107.9	protein_coding	Y
	PF		DYLHMVHRL	9		0.0653	Canonical	NIPBL	ENSG00000164190.19	protein_coding
	0.01	2.23	SYQSQINHI	9		0.0123	Canonical	DDX50	ENSG00000107625.13	protein_coding	Y
	0.01	2.21	LYNKITSRL	9		0.0519	Canonical	CLP1	ENSG00000172409.6	protein_coding	Y
	0.05	1.6	VYQPPLRGQF	10		0.0158	Canonical	ENTPD8	ENSG00000188833.9	protein_coding	Y
	PF		KYKDQPQQTF	10		0.0211	Canonical	STAB1	ENSG00000010327.10	protein_coding
	0.01	1.82	AYARIGNSYF	10		0.0995	Canonical	STIP1	ENSG00000168439.16	protein_coding	Y
	PF		RYAEEVGIFF	10		0.0168	Canonical	NANS	ENSG00000095380.11	protein_coding
	0.05	1.56	VYKETCISF	9		0.0119	Canonical	TSPAN8	ENSG00000127324.9	protein_coding	Y
	0.01	2.76	KYQEVTNNLEF	11		0.0151	Canonical	CAPRIN1	ENSG00000135387.21	protein_coding	Y
	PF		AFHRPPYHLL	10		0.5882	Canonical	EDC4	ENSG00000038358.15	protein_coding
	0.01	1.94	AYNPMARDLF	10		0.0742	Canonical	MTOR	ENSG00000198793.12	protein_coding	Y
	0.01	1.47	AYLTLTSRM	9	1xOxidation [M9]	0.2692	Canonical	RIF1	ENSG00000080345.17	protein_coding	Y
	0.01	2.01	VYSQIPAAVKL	11		0.0904	Canonical	UBR5	ENSG00000104517.13	protein_coding	Y
	PF		HYGPGWVSM	9		0.091	Canonical	PPIB	ENSG00000166794.4	protein_coding
	0.01	1.71	SYNSQIAKI	9		0.0517	Canonical	RESF1	ENSG00000174718.12	protein_coding	Y
	0.01	1.6	RYKPGEPITF	10		0.0081	Canonical	DENND1B	ENSG00000213047.13	protein_coding	Y
	0.01	1.75	HYPLTTLRF	9		0.0059	Canonical	TNS4	ENSG00000131746.13	protein_coding	Y
	0.01	2.04	IYSSKPLHI	9		0.0144	Canonical	PCNX4	ENSG00000126773.13	protein_coding	Y
	PF		RFLTSQQLF	9		0.0227	Canonical	ARFGEF1	ENSG00000066777.9	protein_coding
	PF		EYAAQLQNF	9		0.0169	Canonical	FNBP1L	ENSG00000137942.16	protein_coding
	0.01	2.6	VYEDLRGSVTF	11		0.0219	Canonical	PIGR	ENSG00000162896.6	protein_coding	Y
	0.01	2.09	SYNPAENAVLL	11		0.1953	Canonical	COPA	ENSG00000122218.16	protein_coding	Y
	0.01	1.32	KYSDVSGLL	9		0.1141	Canonical	INO80C	ENSG00000153391.15	protein_coding	Y
	0.01	2.04	SYILHMIHL	9		0.0385	Canonical	ABHD3	ENSG00000158201.10	protein_coding	Y
	0.01	1.54	DYLKNTYRL	9		0.0436	Canonical	DPP4	ENSG00000197635.10	protein_coding	Y
	PF		GFEDDVVIEF	10		1.0032	Canonical	SRRM1	ENSG00000133226.17	protein_coding
	PF		GFEDDVVIEF	10		1.0032	Canonical	SRRM1P3	ENSG00000237307.2	processed_pseudogene
	PF		LYTDRTEKL	9		0.1451	Canonical	TGFBI	ENSG00000120708.17	protein_coding
	0.01	1.76	LYIGWDKHYGF	11		0.1634	Canonical	PSMA4	ENSG00000041357.16	protein_coding	Y
	PF		VYFSAAHAL	9		0.036	Canonical	ORC3	ENSG00000135336.14	protein_coding
	PF		AFKKLNNLTF	10		0.4656	Canonical	OGN	ENSG00000106809.11	protein_coding
	0.05	2.09	LYRGSTSTF	9		0.0918	Canonical	ITGB6	ENSG00000115221.12	protein_coding	Y
	0.01	2.59	KYPVHIYRL	9		0.0069	Canonical	RAD54B	ENSG00000197275.14	protein_coding	Y
	0.01	2.59	KYPVHIYRL	9		0.0069	Canonical	FSBP	ENSG00000265817.3	protein_coding	Y
	0.01	2.26	YYLTPDGQRF	10		0.0117	Canonical	CYP4F11	ENSG00000171903.16	protein_coding	Y
	0.01	2.26	YYLTPDGQRF	10		0.0117	Canonical	CYP4F3	ENSG00000186529.16	protein_coding	Y
	PF		IFKDKPIKL	9		0.1897	Canonical	SH3KBP1	ENSG00000147010.18	protein_coding
	0.01	1.85	VYKDSFELKF	10		0.0119	Canonical	CUL4A	ENSG00000139842.15	protein_coding	Y
	0.01	2.26	YYLTPDGQRF	10		0.0117	Canonical	CYP4F2	ENSG00000186115.13	protein_coding	Y
	0.01	2.82	KFLDAGHKLNF	11		0.1022	Canonical	PDIA3	ENSG00000167004.13	protein_coding	Y
	0.01	2.82	KFLDAGHKLNF	11		0.1022	Canonical	PDIA3P1	ENSG00000180867.11	transcribed_processed_pseudogene	Y
	0.01	1.61	VYGFPVNQL	9		0.0437	Canonical	EXOC6B	ENSG00000144036.15	protein_coding	Y
	PF		SYIEVSHGLG	10		1.9257	Canonical	SYNPO2	ENSG00000172403.11	protein_coding
	0.01	1.74	VYCLRTEYI	9		0.2144	Canonical	TOPBP1	ENSG00000163781.13	protein_coding	Y
	0.01	2.67	RYMNHMQSLRF	11		0.0455	Canonical	ARIH1	ENSG00000166233.15	protein_coding	Y
	0.01	1.66	IYGFMHDHL	9		0.1435	Canonical	SACS	ENSG00000151835.16	protein_coding	Y
	PF		TYMDAQLFKKV	11		0.9284	Canonical	RGL1	ENSG00000143344.15	protein_coding
	PF		KFMGVQMETF	10		0.1258	Canonical	IQGAP1	ENSG00000140575.13	protein_coding
	PF		KMPKMKMPKF	10		0.4883	Canonical	AHNAK	ENSG00000124942.14	protein_coding
	0.01	3.26	KMPKVKMPKF	10		0.3826	Canonical	AHNAK	ENSG00000124942.14	protein_coding	Y
	0.05	2.18	KYVDLTVSF	9		0.0028	Canonical	UBA6	ENSG00000033178.13	protein_coding	Y
	0.01	1.79	RGTYLPQTYII	11		0.332	Canonical	ITM2C	ENSG00000135916.16	protein_coding	Y
	PF		IYINSRSVFL	10		0.2885	Canonical	CAPN5	ENSG00000149260.18	protein_coding
	PF		LYSSNSANEVF	11		0.1867	Canonical	ST6GALNAC6	ENSG00000160408.14	protein_coding
	0.01	2.85	VHADRNTFHRF	11		0.7376	Canonical	AMPD2	ENSG00000116337.17	protein_coding	Y
	PF		LYSSNSANEVF	11		0.1867	Canonical	AL157935.2	ENSG00000257524.6	protein_coding
	PF		AYPARPAQL	9		0.1143	Canonical	LEMD2	ENSG00000161904.12	protein_coding
	0.01	2.13	NGSYNDYVREF	11		0.4546	Canonical	YTHDC1	ENSG00000083896.12	protein_coding	Y
	0.05	1.82	RYGGPLGITI	10		0.1693	Canonical	GRIP2	ENSG00000144596.13	protein_coding	Y
	0.05	1.82	RYGGPLGITI	10		0.1693	Canonical	GRIP1	ENSG00000155974.12	protein_coding	Y
	PF		RMGATPTPF	9		1.4135	Canonical	AL358113.1	ENSG00000285130.2	protein_coding
	0.01	1.9	KYLREFQLTL	10		0.0826	Canonical	C16orf89	ENSG00000153446.15	protein_coding	Y
	PF		MYEENSRDNPF	11		0.7424	Canonical	SCG2	ENSG00000171951.5	protein_coding
	0.01	1.89	RYPECGNLLL	10		0.1838	Canonical	STAP2	ENSG00000178078.11	protein_coding	Y
	PF		RMGATPTPF	9		1.4135	Canonical	TJP2	ENSG00000119139.20	protein_coding
	0.01	1.75	LYNPKITSEL	10		0.2143	Canonical	RIF1	ENSG00000080345.17	protein_coding	Y
	0.01	2.56	IYRGAGGSF	9		0.3031	Canonical	SCAMP4	ENSG00000227500.10	protein_coding	Y
	PF		KYNGEPVQI	9		0.0822	Canonical	VIL1	ENSG00000127831.10	protein_coding
	0.01	2.95	KYLDELGFTVF	11		0.0248	Canonical	HSD17B2	ENSG00000086696.11	protein_coding	Y
	0.01	2.5	IYREFREEESL	11		0.9241	Canonical	PRKDC	ENSG00000253729.7	protein_coding	Y
	0.01	1.42	LYAAPPHVI	9		0.0516	Canonical	FAM168B	ENSG00000152102.18	protein_coding	Y
	0.01	2.57	KYTEGVQSL	9		0.0244	Canonical	SUPT16H	ENSG00000092201.10	protein_coding	Y
	0.05	1.64	VFVNTHHIL	9		0.2288	Canonical	B3GNT2	ENSG00000170340.11	protein_coding	Y
	0.01	2.29	IYIKHPHLFKY	11		0.2829	Canonical	DNTTIP1	ENSG00000101457.13	protein_coding	Y
	0.05	1.41	TYGGSWKF	8		0.1733	Canonical	AIG1	ENSG00000146416.18	protein_coding	Y
	PF		PFAKPLPTF	9		0.0309	Canonical	EP400	ENSG00000183495.13	protein_coding
	PF		TYLVDMRRF	9		0.044	Canonical	FZD1	ENSG00000157240.3	protein_coding
	PF		TYLVDMRRF	9		0.044	Canonical	FZD7	ENSG00000155760.2	protein_coding
	0.01	2.73	RYLENGKETL	10		0.1578	Canonical	HLA-F	ENSG00000204642.14	protein_coding	Y
	0.01	1.94	KYQPRVHII	9		0.0114	Canonical	TBX20	ENSG00000164532.10	protein_coding	Y
	0.05	1.41	NYAENILTL	9		0.0192	Canonical	FIGNL1	ENSG00000132436.11	protein_coding	Y
	0.01	2.73	RYLENGKETL	10		0.1578	Canonical	HLA-C	ENSG00000204525.16	protein_coding	Y
	0.01	2.73	RYLENGKETL	10		0.1578	Canonical	HLA-A	ENSG00000206503.13	protein_coding	Y
	PF		YYMRDVTAI	9		0.0751	Canonical	DHX35	ENSG00000101452.15	protein_coding
	0.01	2.73	RYLENGKETL	10		0.1578	Canonical	HLA-H	ENSG00000206341.7	unprocessed_pseudogene	Y
	PF		QYVNEVFNF	9		0.0067	Canonical	GRAMD1B	ENSG00000023171.18	protein_coding
	0.01	1.94	KYQPRVHII	9		0.0114	Canonical	AC084357.3	ENSG00000255583.2	transcribed_unprocessed_pseudogene	Y
	0.01	1.8	LYSHHFQRF	9		0.0063	Canonical	PRPF39	ENSG00000185246.17	protein_coding	Y
	0.01	1.8	TYAPVKSFL	9		0.0292	Canonical	ST3GAL2	ENSG00000157350.13	protein_coding	Y
	0.01	1.69	EYLVVPSTF	9		0.0066	Canonical	CAPN8	ENSG00000203697.11	protein_coding	Y
	PF		FFHEGQYVF	9		0.0618	Canonical	XKR9	ENSG00000221947.7	protein_coding
	PF		KYTNWKAFL	9		0.2057	Canonical	MBTD1	ENSG00000011258.16	protein_coding
	0.05	1.56	RYAKIVEI	8		0.3994	Canonical	ATP1A1	ENSG00000163399.16	protein_coding	Y
	PF		IYGSVDRVI	9		0.2285	Canonical	VIRMA	ENSG00000164944.12	protein_coding
	0.05	2.21	VYTHSYLCF	9		0.0165	Canonical	ENTPD8	ENSG00000188833.9	protein_coding	Y
	0.01	2.74	VYSPLGSAYKL	11		0.0931	Canonical	SLC38A9	ENSG00000177058.12	protein_coding	Y
	PF		KYTDWTEFL	9		0.0499	Canonical	SFMBT2	ENSG00000198879.11	protein_coding
	PF		IFAQNRPEW	9		0.1248	Canonical	ACSL5	ENSG00000197142.10	protein_coding
	0.05	1.68	VYIAGQQAF	9		0.0066	Canonical	HNRNPLL	ENSG00000143889.16	protein_coding	Y
	PF		IFAQNRPEW	9		0.1248	Canonical	ACSL1	ENSG00000151726.14	protein_coding
	PF		LYKTIFEGF	9		0.041	Canonical	CEP104	ENSG00000116198.13	protein_coding
	0.01	1.52	YYLGNPAEF	9		0.0031	Canonical	RCN1	ENSG00000049449.9	protein_coding	Y
	0.01	1.56	EYTDLMLKL	9		0.1516	Canonical	CALB1	ENSG00000104327.7	protein_coding	Y
	0.01	1.64	VYMPASSYQSL	11		0.0352	Canonical	FAM126B	ENSG00000155744.9	protein_coding	Y
	PF		VYIHHFDSI	9		0.0254	Canonical	MOB3C	ENSG00000142961.14	protein_coding
	0.05	1.32	KYPASTVQI	9		0.0346	Canonical	NOP56	ENSG00000101361.17	protein_coding	Y
	PF		QYIKKLYIL	9		0.0182	Canonical	PAXIP1	ENSG00000157212.18	protein_coding
	PF		GWGVEAEEF	9		0.6321	Canonical	ASNA1	ENSG00000198356.11	protein_coding
	PF		IGAEVYHNL	9		1.4917	Canonical	ENO1	ENSG00000074800.16	protein_coding
	0.01	1.52	YYLGNPAEF	9		0.0031	Canonical	AL035078.4	ENSG00000285283.1	protein_coding	Y
	0.01	1.74	QYLTSVQQL	9		0.0172	Canonical	CEP97	ENSG00000182504.11	protein_coding	Y
	PF		AYIRKHVQL	9		0.0611	Canonical	DDC	ENSG00000132437.18	protein_coding
	0.01	1.86	MYINEVERL	9		0.0253	Canonical	PTPN14	ENSG00000152104.12	protein_coding	Y
	PF		VFKTTLNEF	9		0.0806	Canonical	RIOK3	ENSG00000101782.15	protein_coding
	0.01	2.09	KYLAEKYLQKL	11		0.2763	Canonical	RAB23	ENSG00000112210.12	protein_coding	Y
	0.05	1.56	TYISAIRERF	10		0.0232	Canonical	NXF1	ENSG00000162231.14	protein_coding	Y
	0.01	2.16	KYISKPENLKL	11		0.116	Canonical	CAB39	ENSG00000135932.11	protein_coding	Y
	0.01	2.16	KYISKPENLKL	11		0.116	Canonical	CAB39L	ENSG00000102547.19	protein_coding	Y
	PF		KYLEESTIRHF	11		0.0183	Canonical	AMOTL1	ENSG00000166025.18	protein_coding
	PF		VYPARTQTL	9		0.015	Canonical	HLA-DRB5	ENSG00000198502.6	protein_coding
	0.05	1.55	LYENTFQEL	9		0.1282	Canonical	ITPRID2	ENSG00000138434.17	protein_coding	Y
	PF		IYGGSDSRF	9		0.0759	Canonical	SF3B1	ENSG00000115524.16	protein_coding
	PF		KLPEKTQTF	9		0.0295	Canonical	INTS14	ENSG00000138614.15	protein_coding
	PF		EYSKNWFTV	9		0.2072	Canonical	TRPM6	ENSG00000119121.22	protein_coding
	0.05	1.97	VYVGAVNRI	9		0.0395	Canonical	PLXNA1	ENSG00000114554.11	protein_coding	Y
	PF		LYAKIAEAF	9		0.0153	Canonical	GIPC3	ENSG00000179855.8	protein_coding
	0.01	1.95	LYSEVDVHF	9		0.0083	Canonical	POGZ	ENSG00000143442.22	protein_coding	Y
	PF		KYMKAIPTI	9		0.0077	Canonical	SLC5A1	ENSG00000100170.9	protein_coding
	0.05	1.54	QFPVGRVHRLL	11		1.9463	Canonical	AL031777.3	ENSG00000282988.2	protein_coding	Y
	0.05	1.54	QFPVGRVHRLL	11		1.9463	Canonical	H2AFX	ENSG00000188486.3	protein_coding	Y
	PF		KLFPNFLKL	9		0.4215	Canonical	SPDYA	ENSG00000163806.16	protein_coding
	PF		KYGDMRVTM	9		0.1132	Canonical	DOCK4	ENSG00000128512.22	protein_coding
	0.01	2.17	YVSRPSHF	8		0.9472	Canonical	STAT2	ENSG00000170581.14	protein_coding	Y
	0.05	1.54	QFPVGRVHRLL	11		1.9463	Canonical	HIST1H2AG	ENSG00000196787.3	protein_coding	Y
	PF		HYCNKVFAL	9		0.2503	Canonical	ZBTB38	ENSG00000177311.11	protein_coding
	0.05	1.54	QFPVGRVHRLL	11		1.9463	Canonical	HIST1H2AC	ENSG00000180573.9	protein_coding	Y
	0.01	2.1	KYGPIRQI	8		0.498	Canonical	SF3B6	ENSG00000115128.7	protein_coding	Y
	0.05	1.54	QFPVGRVHRLL	11		1.9463	Canonical	HIST3H2A	ENSG00000181218.5	protein_coding	Y
	0.05	1.12	VYVDDIYVI	9		0.0299	Canonical	KNL1	ENSG00000137812.19	protein_coding	Y
	PF		KYGFGYQL	8		0.5924	Canonical	PLK2	ENSG00000145632.15	protein_coding
	PF		KYGFGYQL	8		0.5924	Canonical	PLK5	ENSG00000185988.13	protein_coding
	0.05	1.36	LYGQVQVF	8		0.3234	Canonical	NOL9	ENSG00000162408.11	protein_coding	Y
	PF		TYPNTYIF	8		0.1179	Canonical	TRPC4AP	ENSG00000100991.12	protein_coding
	0.01	2.46	YWSHPRKF	8		0.5405	Canonical	RPS29	ENSG00000213741.10	protein_coding	Y
	0.05	1.54	QFPVGRVHRLL	11		1.9463	Canonical	HIST2H2AA4	ENSG00000272196.2	protein_coding	Y
	0.01	2.46	YWSHPRKF	8		0.5405	Canonical	AL161787.1	ENSG00000219928.2	processed_pseudogene	Y
	0.05	1.54	QFPVGRVHRLL	11		1.9463	Canonical	HIST2H2AA3	ENSG00000203812.2	protein_coding	Y
	0.05	1.54	QFPVGRVHRLL	11		1.9463	Canonical	HIST2H2AB	ENSG00000184270.5	protein_coding	Y
	0.05	1.18	YYDEIINAL	9		0.1075	Canonical	PLXNB2	ENSG00000196576.15	protein_coding	Y
	PF		KYLRRLFRF	9		0.0093	Canonical	UNC50	ENSG00000115446.11	protein_coding
	0.01	1.73	YYEYEFMEL	9	1xOxidation [M7]	0.2331	Canonical	ATP9A	ENSG00000054793.13	protein_coding	Y
	0.05	1.54	QFPVGRVHRLL	11		1.9463	Canonical	HIST1H2AE	ENSG00000277075.2	protein_coding	Y
	0.05	1.49	GYCPNHPVI	9		0.3208	Canonical	NEDD4L	ENSG00000049759.18	protein_coding	Y
	PF		SYFSGSHMF	9		0.0025	Canonical	CCNJL	ENSG00000135083.15	protein_coding
	0.05	1.54	QFPVGRVHRLL	11		1.9463	Canonical	HIST1H2AI	ENSG00000196747.4	protein_coding	Y
	0.05	1.54	QFPVGRVHRLL	11		1.9463	Canonical	HIST1H2AB	ENSG00000278463.1	protein_coding	Y
	0.05	1.54	QFPVGRVHRLL	11		1.9463	Canonical	HIST1H2AD	ENSG00000196866.2	protein_coding	Y
	PF		VYQQTSHMM	9		0.0429	Canonical	NFAT5	ENSG00000102908.22	protein_coding
	0.05	1.54	QFPVGRVHRLL	11		1.9463	Canonical	HIST1H2AK	ENSG00000275221.1	protein_coding	Y
	0.05	1.54	QFPVGRVHRLL	11		1.9463	Canonical	HIST1H2AL	ENSG00000276903.1	protein_coding	Y
	0.05	1.54	QFPVGRVHRLL	11		1.9463	Canonical	HIST1H2AM	ENSG00000278677.1	protein_coding	Y
	0.05	1.54	QFPVGRVHRLL	11		1.9463	Canonical	H2AFJ	ENSG00000246705.4	protein_coding	Y
	0.05	1.54	QFPVGRVHRLL	11		1.9463	Canonical	HIST2H2AC	ENSG00000184260.5	protein_coding	Y
	0.05	1.54	QFPVGRVHRLL	11		1.9463	Canonical	HIST1H2AH	ENSG00000274997.1	protein_coding	Y
	0.05	2.08	FYIRRVHNL	9		0.0181	Canonical	NUP205	ENSG00000155561.15	protein_coding	Y
	PF		NYNLVTENL	9		0.1175	Canonical	UBE4A	ENSG00000110344.9	protein_coding
	0.05	1.54	QFPVGRVHRLL	11		1.9463	Canonical	HIST1H2AJ	ENSG00000276368.1	protein_coding	Y
	0.01	2.46	YWSHPRKF	8		0.5405	Canonical	RPS29P9	ENSG00000223433.1	processed_pseudogene	Y
	PF		VYTSGIYNV	9		0.1356	Canonical	TNS3	ENSG00000136205.17	protein_coding
	0.01	1.44	VYGKTSHL	8		0.648	Canonical	SP1	ENSG00000185591.10	protein_coding	Y
	0.01	1.59	YYINKISSTL	10		0.1023	Canonical	KRTCAP2	ENSG00000163463.11	protein_coding	Y
	0.01	1.59	YYINKISSTL	10		0.1023	Canonical	AL713999.1	ENSG00000273088.2	protein_coding	Y
	PF		SYITKPEKW	9		0.0116	Canonical	MANEA	ENSG00000172469.16	protein_coding
	0.01	1.44	VYGKTSHL	8		0.648	Canonical	SP4	ENSG00000105866.15	protein_coding	Y
	0.05	1.25	LYTDTICEI	9		0.4238	Canonical	ITGB4	ENSG00000132470.14	protein_coding	Y
	0.01	1.44	VYGKTSHL	8		0.648	Canonical	SP3	ENSG00000172845.15	protein_coding	Y
	PF		TYISSHPNF	9		0.0024	Canonical	COG3	ENSG00000136152.15	protein_coding
	0.01	1.44	VYGKTSHL	8		0.648	Canonical	SP8	ENSG00000164651.16	protein_coding	Y
	0.01	1.44	VYGKTSHL	8		0.648	Canonical	SP9	ENSG00000217236.2	protein_coding	Y
	0.01	1.44	VYGKTSHL	8		0.648	Canonical	SP5	ENSG00000204335.3	protein_coding	Y
	0.01	2.02	YIKHPVSL	8		1.0539	Canonical	PSMD8	ENSG00000099341.11	protein_coding	Y
	0.01	1.99	YISEHEHF	8		0.4218	Canonical	CLPTM1	ENSG00000104853.16	protein_coding	Y
	0.01	2.07	YGEIFEKF	8		0.2676	Canonical	NDUFC2	ENSG00000151366.13	protein_coding	Y
	PF		VYSVPHFF	8		0.0321	Canonical	KIAA0391	ENSG00000100890.15	protein_coding
	PF		VYSVPHFF	8		0.0321	Canonical	AL121594.1	ENSG00000258790.1	protein_coding
	0.01	2.34	RFIKKLEHTW	10		0.2765	Canonical	PIP5K1C	ENSG00000186111.9	protein_coding	Y
	0.05	1.02	SYGSGRRF	8		0.6856	Canonical	HNRNPA1	ENSG00000135486.17	protein_coding	Y
	0.05	1.02	SYGSGRRF	8		0.6856	Canonical	HNRNPA1P48	ENSG00000224578.5	protein_coding	Y
	0.05	1.02	SYGSGRRF	8		0.6856	Canonical	HNRNPA1L2	ENSG00000139675.12	protein_coding	Y
	PF		NYGPMKGGSF	10		0.403	Canonical	HNRNPA3	ENSG00000170144.20	protein_coding
	0.05	1.09	NYSDAIVWL	9		0.2145	Canonical	NARS	ENSG00000134440.12	protein_coding	Y
	PF		NYGPMKGGSF	10		0.403	Canonical	HNRNPA3P6	ENSG00000213300.5	processed_pseudogene
	PF		NYGPMKGGSF	10		0.403	Canonical	HNRNPA3P5	ENSG00000236565.3	processed_pseudogene
	PF		NYGPMKGGSF	10		0.403	Canonical	HNRNPA3P2	ENSG00000227688.2	unprocessed_pseudogene
	PF		NYGPMKGGSF	10		0.403	Canonical	HNRNPA3P3	ENSG00000214653.4	processed_pseudogene
	0.01	2.04	RYSNAQILQF	10		0.0295	Canonical	MTMR11	ENSG00000014914.21	protein_coding	Y
	0.05	1.02	SYGSGRRF	8		0.6856	Canonical	HNRNPA1P60	ENSG00000233497.4	processed_pseudogene	Y
	0.05	1.02	SYGSGRRF	8		0.6856	Canonical	HNRNPA1P4	ENSG00000206228.4	processed_pseudogene	Y
	0.05	1.87	KYRARFFHL	9		0.1379	Canonical	NOC4L	ENSG00000184967.7	protein_coding	Y
	PF		RYRDRLQYF	9		0.0219	Canonical	IQGAP1	ENSG00000140575.13	protein_coding
	0.05	1.57	VLPQRFPQF	9		0.0423	Canonical	CNOT4	ENSG00000080802.18	protein_coding	Y
	0.05	1.66	TYGCTWEF	8		0.4954	Canonical	ABHD2	ENSG00000140526.18	protein_coding	Y
	0.05	1.02	SYGSGRRF	8		0.6856	Canonical	HNRNPA1P3	ENSG00000226188.2	processed_pseudogene	Y
	PF		FLDPDRHFL	9		1.6015	Canonical	FAM83H	ENSG00000180921.7	protein_coding
	0.05	1.02	SYGSGRRF	8		0.6856	Canonical	HNRNPA1P41	ENSG00000220937.3	processed_pseudogene	Y
	0.05	1.02	SYGSGRRF	8		0.6856	Canonical	HNRNPA1P38	ENSG00000253605.1	processed_pseudogene	Y
	PF		KYLDIHERM	9		0.0232	Canonical	TIMM10	ENSG00000134809.9	protein_coding
	0.05	1.02	SYGSGRRF	8		0.6856	Canonical	HNRNPA1P11	ENSG00000264315.1	processed_pseudogene	Y
	0.05	1.02	SYGSGRRF	8		0.6856	Canonical	HNRNPA1P56	ENSG00000248640.1	processed_pseudogene	Y
	PF		FFKPHWDEKF	10		0.2738	Canonical	SERPINH1	ENSG00000149257.14	protein_coding
	0.05	1.02	SYGSGRRF	8		0.6856	Canonical	HNRNPA1P1	ENSG00000218347.2	processed_pseudogene	Y
	0.01	1.8	IYYTGKYQSL	10		0.1221	Canonical	MYCBP2	ENSG00000005810.18	protein_coding	Y
	0.05	1.27	SYSGVSLF	8		0.1697	Canonical	DCN	ENSG00000011465.17	protein_coding	Y
	0.01	2.7	PYRLIFEKF	9		0.1039	Canonical	PRKDC	ENSG00000253729.7	protein_coding	Y
	0.05	1.57	EYISTVKTL	9		0.0667	Canonical	ING5	ENSG00000168395.15	protein_coding	Y
	0.01	1.45	EYGIFNQKI	9		0.2799	Canonical	PYGL	ENSG00000100504.17	protein_coding	Y
	0.05	1.52	SLPHRRPHFF	10		0.8539	Canonical	CLU	ENSG00000120885.21	protein_coding	Y
	0.01	3.29	HYLDQLNHI	9		0.0197	Canonical	MAPK3	ENSG00000102882.12	protein_coding	Y
	0.05	2	IYASVRTLL	9		0.0262	Canonical	SH3BP4	ENSG00000130147.16	protein_coding	Y
	0.01	3.29	HYLDQLNHI	9		0.0197	Canonical	MAPK1	ENSG00000100030.14	protein_coding	Y
	0.01	2.66	IFHEVPLKF	9		0.0055	Canonical	ICE2	ENSG00000128915.12	protein_coding	Y
	0.01	2.66	IFHEVPLKF	9		0.0055	Canonical	ICE2P2	ENSG00000242705.1	processed_pseudogene	Y
	0.01	2.55	KYLEDRGEVTF	11		0.0288	Canonical	GRK2	ENSG00000173020.11	protein_coding	Y
	0.01	2.7	VYSHVIQKLQL	11		0.1958	Canonical	SDS	ENSG00000135094.11	protein_coding	Y
	0.01	1.74	SYLENVDHF	9		0.0027	Canonical	CAMTA2	ENSG00000108509.21	protein_coding	Y
	PF		KYVKVFHKF	9		0.0006	Canonical	ZNF92	ENSG00000146757.13	protein_coding
	PF		RYSDSVGRVSF	11		0.0273	Canonical	CAPN13	ENSG00000162949.16	protein_coding
	0.01	2.56	IYQEIILANHF	11		0.0161	Canonical	RINT1	ENSG00000135249.8	protein_coding	Y
	PF		TYLIQHQKI	9		0.0207	Canonical	ZNF189	ENSG00000136870.10	protein_coding
	PF		RYGLFPERL	9		0.0718	Canonical	SH3D21	ENSG00000214193.10	protein_coding
	PF		KYVKVFHKF	9		0.0006	Canonical	ZNF431	ENSG00000196705.8	protein_coding
	0.01	2.81	SYLEKQVVTF	10		0.0069	Canonical	TTC27	ENSG00000018699.13	protein_coding	Y
	0.01	2.72	RWMDQRLVF	9		0.0477	Canonical	GABRP	ENSG00000094755.17	protein_coding	Y
	0.05	1.83	VYANGQHLFD	10		0.2544	Canonical	LGALS4	ENSG00000171747.9	protein_coding	Y
	0.05	1.49	VYQKLSIQL	9		0.0098	Canonical	SENP6	ENSG00000112701.18	protein_coding	Y
	PF		VYLAWILFF	9		0.0572	Canonical	VKORC1	ENSG00000167397.15	protein_coding
	PF		VYLAWILFF	9		0.0572	Canonical	AC135050.2	ENSG00000255439.6	protein_coding
	PF		IYKDNRNLF	9		0.0212	Canonical	CACNA2D2	ENSG00000007402.11	protein_coding
	0.01	2.42	RYIDNSICGF	10		0.0383	Canonical	AC092724.1	ENSG00000140876.11	protein_coding	Y
	PF		IYVSLAHVL	9		0.0256	Canonical	ANO7	ENSG00000146205.13	protein_coding
	0.01	2.22	KYYDKKYQVF	10		0.0121	Canonical	FGGY	ENSG00000172456.17	protein_coding	Y
	PF		KYLGVPKYW	9		0.0428	Canonical	VRK1	ENSG00000100749.8	protein_coding
	PF		KYVKVFHKF	9		0.0006	Canonical	ZNF98	ENSG00000197360.9	protein_coding
	0.01	1.22	VYMPDHSYVTI	11		0.0704	Canonical	RAPGEFL1	ENSG00000108352.12	protein_coding	Y
	PF		KYVKVFHKF	9		0.0006	Canonical	ZNF492	ENSG00000229676.3	protein_coding
	0.01	1.97	LYSNLQHLKW	10		0.2359	Canonical	EHF	ENSG00000135373.12	protein_coding	Y
	0.01	2.1	PYHRRPVLF	9		0.0467	Canonical	AOC3	ENSG00000131471.7	protein_coding	Y
	PF		KYVKVFHKF	9		0.0006	Canonical	ZNF680	ENSG00000173041.12	protein_coding
	0.01	2.05	VYKDHQTITI	10		0.1583	Canonical	MCM3	ENSG00000112118.19	protein_coding	Y
	PF		QYFKNLHRF	9		0.0019	Canonical	GALNT7	ENSG00000109586.12	protein_coding
	0.05	1.5	VYHNMPLIW	9		0.0245	Canonical	MRPS27	ENSG00000113048.16	protein_coding	Y
	PF		KYVKVFHKF	9		0.0006	Canonical	ZNF723	ENSG00000268696.2	protein_coding
	PF		KYVKVFHKF	9		0.0006	Canonical	ZNF730	ENSG00000183850.14	protein_coding
	0.01	2.02	QYWEAQGWTF	10		0.0522	Canonical	TGS1	ENSG00000137574.10	protein_coding	Y
	PF		KYVKVFHKF	9		0.0006	Canonical	ZNF849P	ENSG00000198153.8	unprocessed_pseudogene
	0.05	1.5	AYINKVEEL	9		0.0309	Canonical	DBI	ENSG00000155368.16	protein_coding	Y
	PF		KYVKVFHKF	9		0.0006	Canonical	AL353795.1	ENSG00000215198.3	processed_pseudogene
	PF		KYVKVFHKF	9		0.0006	Canonical	ZNF209P	ENSG00000269138.1	unprocessed_pseudogene
	0.01	2.07	VYSEKVMHMF	10		0.0084	Canonical	MYO18A	ENSG00000196535.16	protein_coding	Y
	0.01	2.33	KYLKTGFLKW	10		0.0946	Canonical	NAPG	ENSG00000134265.13	protein_coding	Y
	0.05	1.25	KYEINKFHF	9		0.0257	Canonical	PDE6A	ENSG00000132915.11	protein_coding	Y
	PF		FSTVHEKF	8		1.9504	Canonical	WDR36	ENSG00000134987.11	protein_coding
	0.01	1.39	VYDITRRETF	10		0.0859	Canonical	RAB2B	ENSG00000129472.15	protein_coding	Y
	PF		KYGKVWGF	8		0.1948	Canonical	CYP3A4	ENSG00000160868.15	protein_coding
	0.01	1.84	SYQKVMALW	9		0.0205	Canonical	MACF1	ENSG00000127603.26	protein_coding	Y
	0.01	2.24	SYNDYVREF	9		0.0057	Canonical	YTHDC1	ENSG00000083896.12	protein_coding	Y
	0.01	3.63	RYMSHKLKI	9		0.0521	Canonical	GBP3	ENSG00000117226.12	protein_coding	Y
	0.01	2.22	KYFSDGSSNTF	11		0.0191	Canonical	BTBD3	ENSG00000132640.15	protein_coding	Y
	0.01	1.39	KYKDKKWYQF	10		0.0541	Canonical	STXBP5L	ENSG00000145087.12	protein_coding	Y
	0.01	1.39	KYKDKKWYQF	10		0.0541	Canonical	STXBP5	ENSG00000164506.14	protein_coding	Y
	PF		SYLKQLPHF	9		0.0018	Canonical	SNRNP200	ENSG00000144028.15	protein_coding
	PF		SYLKQLPHF	9		0.0018	Canonical	AC132812.1	ENSG00000265298.1	unprocessed_pseudogene
	PF		RYLEAALRL	9		0.0182	Canonical	P3H4	ENSG00000141696.13	protein_coding
	0.01	1.77	QYSNNIRQLL	10		0.2938	Canonical	UBA1	ENSG00000130985.17	protein_coding	Y
	PF		VFIDSGRHYW	10		0.1814	Canonical	MID1	ENSG00000101871.14	protein_coding
	0.01	2.04	YYMEKELANF	10		0.0178	Canonical	LSR	ENSG00000105699.16	protein_coding	Y
	0.01	2.62	RYIHPQQEAF	10		0.0242	Canonical	CPSF1	ENSG00000071894.17	protein_coding	Y
	PF	1.05	FYLPSSPNL	9		0.0198	Canonical	SMG5	ENSG00000198952.8	protein_coding
	0.01	1.67	VFFKGFKW	8		0.6163	Canonical	NDUFB3	ENSG00000119013.9	protein_coding	Y
	0.05	1.47	TYIVLVTSL	9		0.067	Canonical	PIGG	ENSG00000174227.16	protein_coding	Y
	0.01	2.47	HYINMPVQF	9		0.0035	Canonical	CEP192	ENSG00000101639.18	protein_coding	Y
	PF		VWYPGKPLKV	10		0.499	Canonical	RARRES1	ENSG00000118849.10	protein_coding
	0.01	2.72	KYSLIKGNF	9		0.0652	Canonical	S100A8	ENSG00000143546.10	protein_coding	Y
	0.01	2.1	KYLLHSLVF	9		0.0171	Canonical	ACOX3	ENSG00000087008.16	protein_coding	Y
	0.01	2.58	LYLLNTTKL	9		0.0518	Canonical	MLH1	ENSG00000076242.14	protein_coding	Y
	0.05	2.3	AYVKGGLSTF	10		0.044	Canonical	EXOC2	ENSG00000112685.14	protein_coding	Y
	0.01	2.65	RMPNSPAPHF	10		0.2148	Canonical	CRYBG1	ENSG00000112297.15	protein_coding	Y
	PF		AYKDKDISFF	10		0.1078	Canonical	ZBED5	ENSG00000236287.8	protein_coding
	PF		KYEAIQLTF	9		0.0072	Canonical	SMC3	ENSG00000108055.9	protein_coding
	PF		KYEAIQLTF	9		0.0072	Canonical	AC019097.1	ENSG00000231822.1	processed_pseudogene
	PF		RYPGHVPNF	9		0.0013	Canonical	MROH6	ENSG00000204839.9	protein_coding
	0.01	2.33	KYGSVTVW	8		0.3861	Canonical	PPP4C	ENSG00000149923.14	protein_coding	Y
	0.01	2.12	VYCARFVEL	9		0.0905	Canonical	THOC2	ENSG00000125676.20	protein_coding	Y
	0.01	1.92	NYQNVVHKL	9		0.009	Canonical	ZMYM4	ENSG00000146463.11	protein_coding	Y
	0.01	2.59	EYLTKVDKL	9		0.1418	Canonical	CLTC	ENSG00000141367.11	protein_coding	Y
	0.01	1.76	FYIHEVQEL	9		0.0311	Canonical	HERC4	ENSG00000148634.15	protein_coding	Y
	PF		PYVDNSYKW	9		0.064	Canonical	LACTB	ENSG00000103642.12	protein_coding
	0.01	2.69	IYQYIQSRF	9		0.006	Canonical	DYRK1A	ENSG00000157540.21	protein_coding	Y
	0.05	1.12	SYTYLSLGF	9		0.1056	Canonical	FTL	ENSG00000087086.15	protein_coding	Y
	0.05	1.12	SYTYLSLGF	9		0.1056	Canonical	FTLP3	ENSG00000226608.3	processed_pseudogene	Y
	0.05	1.12	SYTYLSLGF	9		0.1056	Canonical	FTLP2	ENSG00000232368.1	processed_pseudogene	Y
	0.01	2.69	IYQYIQSRF	9		0.006	Canonical	DYRK1B	ENSG00000105204.14	protein_coding	Y
	PF		SYVDKNLELF	10		0.0152	Canonical	TSTD2	ENSG00000136925.15	protein_coding
	0.01	1.54	HYFDPQYFEF	10		0.0174	Canonical	EIF3I	ENSG00000084623.11	protein_coding	Y
	0.01	2.69	FYSRLLQKF	9		0.0062	Canonical	ZWILCH	ENSG00000174442.12	protein_coding	Y
	PF		TYNEPGSQVF	10		0.0411	Canonical	PBRM1	ENSG00000163939.18	protein_coding
	PF		RYLDLFTSF	9		0.0019	Canonical	KDELR2	ENSG00000136240.10	protein_coding
	0.01	2.13	RYPSNLQLF	9		0.0019	Canonical	TEP1	ENSG00000129566.13	protein_coding	Y
	PF		RYYHCAVTL	9		0.1241	Canonical	KLHL23	ENSG00000213160.10	protein_coding
	0.05	1.18	VYANGQHLF	9		0.0023	Canonical	LGALS4	ENSG00000171747.9	protein_coding	Y
	0.01	2.73	SFHNIHNTF	9		0.0171	Canonical	BUB3	ENSG00000154473.18	protein_coding	Y
	PF		IFTDLSSRF	9		0.0706	Canonical	XRCC5	ENSG00000079246.16	protein_coding
	0.01	2.68	RFPPYHVGQTF	11		0.0135	Canonical	YBX3	ENSG00000060138.13	protein_coding	Y
	PF		AYGTVHYF	8		0.0799	Canonical	LMF2	ENSG00000100258.18	protein_coding
	0.01	2.06	DYILNVMKF	9		0.0299	Canonical	HUWE1	ENSG00000086758.16	protein_coding	Y
	PF		KYAPSGFYI	9		0.0223	Canonical	WDR1	ENSG00000071127.17	protein_coding
	PF		SYNSPIGL	8		1.4945	Canonical	PDLIM3	ENSG00000154553.15	protein_coding
	PF		RWPKKSAEFL	10		0.6891	Canonical	RPL17-C18orf32	ENSG00000215472.10	protein_coding
	PF		RWPKKSAEFL	10		0.6891	Canonical	RPL17	ENSG00000265681.7	protein_coding
	0.01	2.61	RYVEQKAGITF	11		0.0197	Canonical	DDX50	ENSG00000107625.13	protein_coding	Y
	0.01	2.65	YYKNIGLGF	9		0.0366	Canonical	RPS11P5	ENSG00000232888.4	processed_pseudogene	Y
	0.01	1.84	NYSGAAEYLYF	11		0.1569	Canonical	EIF3E	ENSG00000104408.9	protein_coding	Y
	0.01	1.84	NYSGAAEYLYF	11		0.1569	Canonical	EIF3EP1	ENSG00000234882.1	processed_pseudogene	Y
	0.01	1.68	RYSTGLAGNLL	11		0.421	Canonical	CHTF8	ENSG00000168802.13	protein_coding	Y
	PF		RWPKKSAEFL	10		0.6891	Canonical	AC113935.1	ENSG00000226084.5	processed_pseudogene
	0.01	2.65	YYKNIGLGF	9		0.0366	Canonical	RPS11	ENSG00000142534.7	protein_coding	Y
	PF		RWPKKSAEFL	10		0.6891	Canonical	AL049597.1	ENSG00000230721.1	processed_pseudogene
	PF		RWPKKSAEFL	10		0.6891	Canonical	BX679664.3	ENSG00000244716.3	processed_pseudogene
	0.01	4.34	KYSVINEINKI	11		0.3395	Canonical	AC124319.1	ENSG00000173821.19	protein_coding	Y
	PF		RWPKKSAEFL	10		0.6891	Canonical	AC064799.1	ENSG00000212664.5	processed_pseudogene
	PF		LYKPKQEVKF	10		0.0835	Canonical	CD109	ENSG00000156535.15	protein_coding
	0.01	2.9	VYSRTFTWL	9		0.0949	Canonical	MYO1C	ENSG00000197879.17	protein_coding	Y
	0.01	1.46	YYIQNGIQSF	10		0.0084	Canonical	PRKDC	ENSG00000253729.7	protein_coding	Y
	0.01	2.08	LYAPYSTHF	9		0.003	Canonical	GPRC5A	ENSG00000013588.8	protein_coding	Y
	0.01	1.77	KQALKYFNL	9		1.2783	Canonical	SEL1L	ENSG00000071537.14	protein_coding	Y
	0.01	2.57	RYNERLDRLFI	11		1.1372	Canonical	ZSWIM3	ENSG00000132801.7	protein_coding	Y
	0.05	1.84	TYIRRYILKF	10		0.1133	Canonical	ADGRG6	ENSG00000112414.14	protein_coding	Y
	PF		EYLRFLQTI	9		0.0283	Canonical	ITPR2	ENSG00000123104.12	protein_coding
	0.01	1.82	KYGIVLKEF	9		0.0166	Canonical	GTF2F1	ENSG00000125651.14	protein_coding	Y
	PF		VYHDDKQPTF	10		0.0141	Canonical	GXYLT2	ENSG00000172986.12	protein_coding
	0.01	2.08	IFIRTPRTLF	10		0.1597	Canonical	MYO1D	ENSG00000176658.17	protein_coding	Y
	0.01	1.27	YYVDHQGQLF	10		0.0165	Canonical	C8orf82	ENSG00000213563.6	protein_coding	Y
	0.01	1.93	YYDDLKYRYF	10		0.0281	Canonical	ST8SIA4	ENSG00000113532.13	protein_coding	Y
	PF		AYIQGLKEKF	10		0.0423	Canonical	RETSAT	ENSG00000042445.14	protein_coding
	0.05	1.2	IYAGAIKSSF	10		0.0323	Canonical	SLC12A6	ENSG00000140199.11	protein_coding	Y
	0.01	3.05	KYPENDLFRKL	11		0.2149	Canonical	KDM5A	ENSG00000073614.12	protein_coding	Y
	0.01	2.41	IFTNTVARF	9		0.0622	Canonical	AKAP11	ENSG00000023516.9	protein_coding	Y
	0.01	2.45	FYNLLTRTF	9		0.018	Canonical	PIGT	ENSG00000124155.18	protein_coding	Y
	0.01	2.47	KYPVLFQRI	9		0.0122	Canonical	AKAP13	ENSG00000170776.21	protein_coding	Y
	PF		TYNKVLHFF	9		0.0023	Canonical	SEC24D	ENSG00000150961.15	protein_coding
	PF		KYMDIEFDF	9		0.0119	Canonical	MYO1B	ENSG00000128641.19	protein_coding
	PF		KYMDIEFDF	9		0.0119	Canonical	MYO1A	ENSG00000166866.13	protein_coding
	0.01	3.07	RFKNKAYLL	9		0.2723	Canonical	DICER1	ENSG00000100697.14	protein_coding	Y
	PF		KYRDQYNWF	9		0.0585	Canonical	C1GALT1C1	ENSG00000171155.8	protein_coding
	0.01	1.26	IYNETITDLL	10		0.1744	Canonical	CENPE	ENSG00000138778.11	protein_coding	Y
	0.01	2.25	KYPHYFPVM	9		0.0556	Canonical	NLN	ENSG00000123213.23	protein_coding	Y
	0.01	2.78	KYLSDNVHL	9		0.0555	Canonical	CDC37	ENSG00000105401.9	protein_coding	Y
	PF		KYSKRFPEL	9		0.0199	Canonical	PRPF31	ENSG00000105618.14	protein_coding
	0.01	2.43	HYIERIQKL	9		0.0096	Canonical	KANK1	ENSG00000107104.18	protein_coding	Y
	0.01	2.08	AYAIIKEEL	9		0.1565	Canonical	ATAD2	ENSG00000156802.13	protein_coding	Y
	0.01	2.45	VYTYIQSRF	9		0.0107	Canonical	DYRK4	ENSG00000010219.13	protein_coding	Y
	0.01	2.45	VYTYIQSRF	9		0.0107	Canonical	DYRK2	ENSG00000127334.10	protein_coding	Y
	PF		RYPEGIKWKF	10		0.0049	Canonical	TOP1	ENSG00000198900.6	protein_coding
	PF		KYNKILNKY	9		0.2488	Canonical	DOCK2	ENSG00000134516.17	protein_coding
	0.01	1.86	DYIKFLRSI	9		0.1669	Canonical	HDAC1	ENSG00000116478.12	protein_coding	Y
	0.01	1.86	DYIKFLRSI	9		0.1669	Canonical	HDAC1P2	ENSG00000233012.2	transcribed_processed_pseudogene	Y
	0.01	3.34	KFTPVASKF	9		0.0264	Canonical	ZYX	ENSG00000159840.16	protein_coding	Y
	0.05	2.41	RYINFKMANL	10		0.5136	Canonical	KCTD9	ENSG00000104756.16	protein_coding	Y
	0.01	2.23	KYPDIISRI	9		0.0062	Canonical	LIG1	ENSG00000105486.14	protein_coding	Y
	0.05	2.01	RYSRSLTIAEF	11		0.1906	Canonical	TBCB	ENSG00000105254.12	protein_coding	Y
	0.01	1.72	VYKSEFIDL	9		0.0866	Canonical	POLR1B	ENSG00000125630.15	protein_coding	Y
	0.01	2.63	SYVRSLPFF	9		0.0064	Canonical	TRAPPC1	ENSG00000170043.11	protein_coding	Y
	0.01	2.24	KYPVEWAKF	9		0.0047	Canonical	ZC2HC1A	ENSG00000104427.12	protein_coding	Y
	0.01	1.57	IYPPKLHQF	9		0.0008	Canonical	CCNE1	ENSG00000105173.14	protein_coding	Y
	PF		RYKDTINKI	9		0.0209	Canonical	ROCK1	ENSG00000067900.8	protein_coding
	0.01	2.78	KYMEGSKLHYF	11		0.0072	Canonical	PIGW	ENSG00000277161.2	protein_coding	Y
	0.01	2.05	KYADKIYSI	9		0.0039	Canonical	FOLH1	ENSG00000086205.18	protein_coding	Y
	0.01	2.3	RYTIVQQQI	9		0.0294	Canonical	TUBGCP2	ENSG00000130640.13	protein_coding	Y
	0.01	1.66	TYTLRVFEL	9		0.0761	Canonical	PTPRC	ENSG00000081237.20	protein_coding	Y
	0.01	2.49	RYISPDQLADL	11		0.2122	Canonical	ENO1	ENSG00000074800.16	protein_coding	Y
	0.01	3.91	KYTEVLKTHGL	11		0.4206	Canonical	RPL13A	ENSG00000142541.17	protein_coding	Y
	0.01	3.7	RYMPPAHRNFL	11		0.0379	Canonical	IDO1	ENSG00000131203.13	protein_coding	Y
	0.01	3.91	KYTEVLKTHGL	11		0.4206	Canonical	RPL13AP5	ENSG00000236552.2	processed_pseudogene	Y
	0.01	2.4	RYTALQAFKF	10		0.0977	Canonical	UBR2	ENSG00000024048.10	protein_coding	Y
	0.01	3.91	KYTEVLKTHGL	11		0.4206	Canonical	RPL13AP6	ENSG00000234118.1	processed_pseudogene	Y
	0.01	2.29	NYLHRMTTLF	10		0.1004	Canonical	PPP2R1B	ENSG00000137713.15	protein_coding	Y
	0.01	2.29	NYLHRMTTLF	10		0.1004	Canonical	PPP2R1A	ENSG00000105568.18	protein_coding	Y
	0.01	3.91	KYTEVLKTHGL	11		0.4206	Canonical	RPL13AP25	ENSG00000136149.6	processed_pseudogene	Y
	0.01	3.91	KYTEVLKTHGL	11		0.4206	Canonical	RPL13AP20	ENSG00000234498.3	processed_pseudogene	Y
	PF		VYVQILQKL	9		0.0055	Canonical	ORC1	ENSG00000085840.13	protein_coding
	0.01	3.91	KYTEVLKTHGL	11		0.4206	Canonical	AC024940.3	ENSG00000243517.1	processed_pseudogene	Y
	PF		VYKTGVTHYF	10		0.0098	Canonical	SDR42E1	ENSG00000184860.10	protein_coding
	0.01	3.91	KYTEVLKTHGL	11		0.4206	Canonical	AC098935.1	ENSG00000226945.1	processed_pseudogene	Y
	0.01	3.91	KYTEVLKTHGL	11		0.4206	Canonical	RHEX	ENSG00000263961.8	protein_coding	Y
	0.01	3.91	KYTEVLKTHGL	11		0.4206	Canonical	AC074250.1	ENSG00000249970.1	processed_pseudogene	Y
	0.01	1.85	YYLNDLDRI	9		0.1645	Canonical	GNAI1	ENSG00000127955.17	protein_coding	Y
	0.01	1.85	YYLNDLDRI	9		0.1645	Canonical	GNAI3	ENSG00000065135.11	protein_coding	Y
	0.01	1.85	YYLNDLDRI	9		0.1645	Canonical	GNAT3	ENSG00000214415.3	protein_coding	Y
	PF		KYMNNITYYF	10		0.0149	Canonical	LARP1	ENSG00000155506.17	protein_coding
	0.01	2.53	IYNKIKQII	9		0.0459	Canonical	DLG3	ENSG00000082458.12	protein_coding	Y
[truncated: 2,351 more rows]
