# Supplementary material for: CD8+ T–cell Immune Surveillance against a Tumor Antigen Encoded by the Oncogenic Long Noncoding RNA PVT1
Source: Oxford University Press journal article supplement (doi:10.1158/2326-6066.cir-20-0964), 2021-08-25
Supplement: 23266066cir200964-sup-255948_3_supp_7254288_qw7t1y.xlsx [file 23266066cir200964-sup-255948_3_supp_7254288_qw7t1y.xlsx]

## Sheet: Table S8
	Table S8. Peptides detected in CRC123 normal tissue
	RAW file : ST601_CRC123normal_A24.raw
	PF (peak found), peptides without PSMs but with matched-precursor ion peaks found by Proteome Discoverer LFQ.; %rank, score of NetMHCpan-4.1 (HLA-A*24:02); Gene type, biotype registered in GENCODE v31; Shared scan (Y for yes and N for no),the MS scans can be assigned in the search against the Swiss-Prot database
	FDR	XCorr	Sequence	Peptide length	Modification	%rank	Type	Gene	Ensembl gene ID	Gene type	Shared scan
	0.01	2.05	KYGPVFSF	8		0.024	Canonical	CYP51A1	ENSG00000001630.17	protein_coding	Y
	0.01	2.05	KYGPVFSF	8		0.024	Canonical	AC000120.2	ENSG00000285772.1	protein_coding	Y
	PF		YLDKFIRL	8		0.9631	Canonical	GNL3L	ENSG00000130119.16	protein_coding
	PF		YLDKFIRL	8		0.9631	Canonical	GNL3LP1	ENSG00000215032.2	processed_pseudogene
	PF		YLDKFIRL	8		0.9631	Canonical	ERCC8	ENSG00000049167.14	protein_coding
	PF		KYGLFQHI	8		0.3929	Canonical	DHCR24	ENSG00000116133.13	protein_coding
	0.05	1.46	KYGIVQEF	8		0.0583	Canonical	SOGA1	ENSG00000149639.15	protein_coding	Y
	0.01	2.61	KYIHSANVL	9		0.0979	Canonical	MAPK6	ENSG00000069956.12	protein_coding	Y
	0.01	2.61	KYIHSANVL	9		0.0979	Canonical	MAPK4	ENSG00000141639.12	protein_coding	Y
	0.01	2.06	KYFLWEEKF	9		0.0118	Canonical	GRAP	ENSG00000154016.13	protein_coding	Y
	0.01	2.61	KYIHSANVL	9		0.0979	Canonical	MAPK3	ENSG00000102882.12	protein_coding	Y
	0.01	2.61	KYIHSANVL	9		0.0979	Canonical	MAPK1	ENSG00000100030.14	protein_coding	Y
	PF		KWFFQKLRF	9		0.0882	Canonical	RPL27	ENSG00000131469.14	protein_coding
	0.01	2.61	KYIHSANVL	9		0.0979	Canonical	MAPK6P3	ENSG00000237263.1	processed_pseudogene	Y
	0.01	2.61	KYIHSANVL	9		0.0979	Canonical	MAPK6P1	ENSG00000206144.5	processed_pseudogene	Y
	0.01	3.68	KYQKGFSLW	9		0.0112	Canonical	TRAM1	ENSG00000067167.8	protein_coding	Y
	0.01	3.14	KYTKIFNDF	9		0.008	Canonical	ZMYND11	ENSG00000015171.19	protein_coding	Y
	0.01	3.84	RYFKTPRKF	9		0.0086	Canonical	CIZ1	ENSG00000148337.21	protein_coding	Y
	0.01	2.61	EYLKLLHSF	9		0.0061	Canonical	SREBF2	ENSG00000198911.12	protein_coding	Y
	0.01	2.68	LYQDGVFKF	9		0.0031	Canonical	AKTIP	ENSG00000166971.17	protein_coding	Y
	0.01	2.68	LYQDGVFKF	9		0.0031	Canonical	AC010342.1	ENSG00000226432.3	processed_pseudogene	Y
	0.01	2.47	KYTPPPHHI	9		0.007	Canonical	NDUFS5	ENSG00000168653.11	protein_coding	Y
	0.01	2.47	KYTPPPHHI	9		0.007	Canonical	AC024619.4	ENSG00000263781.3	processed_pseudogene	Y
	0.01	2.31	RYMNHMQSL	9		0.017	Canonical	ARIH1	ENSG00000166233.15	protein_coding	Y
	0.01	2.37	KYQDILNEI	9		0.0169	Canonical	IQGAP2	ENSG00000145703.16	protein_coding	Y
	0.01	2.45	KYIDFDHVF	9		0.0034	Canonical	CRAMP1	ENSG00000007545.15	protein_coding	Y
	0.01	2.45	KYIDFDHVF	9		0.0034	Canonical	AL031708.1	ENSG00000261732.1	protein_coding	Y
	0.01	2.33	KYVSGEFRF	9		0.0087	Canonical	RIOK1	ENSG00000124784.9	protein_coding	Y
	PF		RYDTITNQW	9		0.018	Canonical	KLHL29	ENSG00000119771.15	protein_coding
	PF		YYMIGEQKF	9		0.0057	Canonical	NNMT	ENSG00000166741.7	protein_coding
	0.01	2.54	RYKQDVERF	9		0.0164	Canonical	SMC5	ENSG00000198887.9	protein_coding	Y
	0.01	1.71	RYQQWMERF	9		0.0078	Canonical	ELAC2	ENSG00000006744.19	protein_coding	Y
	0.01	2.57	KYMDINFDF	9		0.0078	Canonical	MYO1G	ENSG00000136286.16	protein_coding	Y
	0.01	2.57	KYMDINFDF	9		0.0078	Canonical	MYO1D	ENSG00000176658.17	protein_coding	Y
	0.01	2.72	IYQDVTLKW	9		0.0048	Canonical	BBS9	ENSG00000122507.20	protein_coding	Y
	0.01	3.07	TYAEKLHRL	9		0.0079	Canonical	DST	ENSG00000151914.20	protein_coding	Y
	0.01	2.3	NYSNIRFQF	9		0.0124	Canonical	MTMR6	ENSG00000139505.11	protein_coding	Y
	0.01	1.16	FYQRFPLSF	9		0.0047	Canonical	EDEM1	ENSG00000134109.11	protein_coding	Y
	0.01	2.34	RYQDAIRVF	9		0.0073	Canonical	EIF3L	ENSG00000100129.18	protein_coding	Y
	0.01	2.34	RYQDAIRVF	9		0.0073	Canonical	EIF3LP2	ENSG00000233837.1	processed_pseudogene	Y
	0.01	2.61	NYLRAFHAL	9		0.0412	Canonical	BAIAP2L2	ENSG00000128298.17	protein_coding	Y
	0.01	2.33	AYVHMVTHF	9	1xOxidation [M5]	0.0061	Canonical	TMBIM6	ENSG00000139644.13	protein_coding	Y
	0.01	2.19	TYLDKIKKF	9		0.0044	Canonical	SYNE2	ENSG00000054654.16	protein_coding	Y
	0.01	2.54	KYEELFPAF	9		0.0154	Canonical	NAPA	ENSG00000105402.8	protein_coding	Y
	0.01	2.88	VYERELQTF	9		0.0079	Canonical	EEF1AKMT2	ENSG00000203791.15	protein_coding	Y
	0.01	2.84	RYGIHPAKF	9		0.0126	Canonical	VWA8	ENSG00000102763.18	protein_coding	Y
	0.01	2.03	KYQHLKAEF	9		0.0248	Canonical	EEA1	ENSG00000102189.16	protein_coding	Y
	0.01	2.06	VYAILTHGI	9		0.0545	Canonical	PRPS1	ENSG00000147224.11	protein_coding	Y
	0.01	2.06	VYAILTHGI	9		0.0545	Canonical	PRPS2	ENSG00000101911.12	protein_coding	Y
	0.01	2.06	VYAILTHGI	9		0.0545	Canonical	PRPS1L1	ENSG00000229937.7	protein_coding	Y
	0.01	1.99	HYILHNSFF	9		0.04	Canonical	TIPARP	ENSG00000163659.13	protein_coding	Y
	PF		KYAELKDRL	9		0.1226	Canonical	LAMB3	ENSG00000196878.15	protein_coding
	0.01	2.37	KYGQGFYLI	9		0.0148	Canonical	LLGL2	ENSG00000073350.13	protein_coding	Y
	0.01	2.35	KYGIQMPAF	9		0.0453	Canonical	IQGAP1	ENSG00000140575.13	protein_coding	Y
	0.01	2.68	VYAQVARLF	9		0.0039	Canonical	SIN3A	ENSG00000169375.15	protein_coding	Y
	0.01	2.62	YWMHVQNTF	9		0.0149	Canonical	KLHL24	ENSG00000114796.16	protein_coding	Y
	0.01	3.62	KYSLVKNKI	9		0.101	Canonical	S100A16	ENSG00000188643.11	protein_coding	Y
	0.01	2.62	IYQRHVYNL	9		0.0062	Canonical	TMEM209	ENSG00000146842.17	protein_coding	Y
	PF		IYLDTHFRL	9		0.0062	Canonical	ZNFX1	ENSG00000124201.15	protein_coding
	PF		VYNNNSSRF	9		0.0149	Canonical	MYO10	ENSG00000145555.15	protein_coding
	0.01	2.88	KYISKPENL	9		0.0132	Canonical	CAB39	ENSG00000135932.11	protein_coding	Y
	0.01	2.88	KYISKPENL	9		0.0132	Canonical	CAB39L	ENSG00000102547.19	protein_coding	Y
	0.01	2.04	NYTDIKDYL	9		0.2366	Canonical	NUDT12	ENSG00000112874.10	protein_coding	Y
	0.01	2.38	TYPEVKNKL	9		0.0484	Canonical	IQGAP2	ENSG00000145703.16	protein_coding	Y
	PF		KYIQRQETI	9		0.017	Canonical	MX1	ENSG00000157601.14	protein_coding
	0.01	1.74	VYGFVREAL	9		0.2712	Canonical	UBXN6	ENSG00000167671.12	protein_coding	Y
	0.01	2.8	RWMSQHNRF	9		0.0464	Canonical	PAFAH1B2	ENSG00000168092.14	protein_coding	Y
	0.01	2.8	RWMSQHNRF	9		0.0464	Canonical	AL929325.1	ENSG00000271693.1	processed_pseudogene	Y
	0.05	1.52	QYMKIISSF	9		0.0035	Canonical	HSPA4	ENSG00000170606.15	protein_coding	Y
	0.01	2.48	KYMDVQFDF	9		0.0063	Canonical	MYO1C	ENSG00000197879.17	protein_coding	Y
	PF		FYTVIPHNF	9		0.0033	Canonical	PARP3	ENSG00000041880.14	protein_coding
	PF		RWMSLHHRF	9		0.0114	Canonical	PAFAH1B3	ENSG00000079462.7	protein_coding
	0.01	3.54	KYINTDAKF	9		0.014	Canonical	TRPC4AP	ENSG00000100991.12	protein_coding	N
	PF		KWLTKSFHF	9		0.0191	Canonical	SLC35C2	ENSG00000080189.15	protein_coding
	0.01	1.89	EYSKQMQRF	9		0.0309	Canonical	HDAC2	ENSG00000196591.12	protein_coding	Y
	0.01	1.89	EYSKQMQRF	9		0.0309	Canonical	HDAC1	ENSG00000116478.12	protein_coding	Y
	PF		KYVHLFPKL	9		0.0162	Canonical	SNRNP200	ENSG00000144028.15	protein_coding
	0.01	2	RYLNEFEEL	9		0.0194	Canonical	EIF2AK1	ENSG00000086232.13	protein_coding	Y
	PF		RYFHWKMNL	9		0.0727	Canonical	GPR89B	ENSG00000188092.14	protein_coding
	PF		RYFHWKMNL	9		0.0727	Canonical	GPR89A	ENSG00000117262.19	protein_coding
	0.01	2	RYLNEFEEL	9		0.0194	Canonical	AC109992.1	ENSG00000242479.1	processed_pseudogene	Y
	0.01	2.15	IYKSIMEQF	9		0.0034	Canonical	BAIAP2L2	ENSG00000128298.17	protein_coding	Y
	0.01	2	TYIKSPPFF	9		0.002	Canonical	ACO1	ENSG00000122729.19	protein_coding	Y
	0.01	2.31	IYQKYIARF	9		0.0019	Canonical	CASZ1	ENSG00000130940.15	protein_coding	Y
	0.01	2.61	IYLEKLKTI	9		0.0152	Canonical	PLEC	ENSG00000178209.15	protein_coding	Y
	PF		KYPVLVERI	9		0.0193	Canonical	ARHGEF28	ENSG00000214944.9	protein_coding
	PF		KYPVLVERI	9		0.0193	Canonical	ARHGEF18	ENSG00000104880.18	protein_coding
	PF		KYPVLVERI	9		0.0193	Canonical	AC008878.3	ENSG00000268861.7	protein_coding
	0.01	2.14	SYTRLFSNF	9		0.0063	Canonical	UBP1	ENSG00000153560.12	protein_coding	Y
	0.01	1.84	VFKEKHHSW	9		0.1338	Canonical	RNASEH2B	ENSG00000136104.20	protein_coding	Y
	0.01	1.82	TYVRWYTQL	9		0.0276	Canonical	CLCC1	ENSG00000121940.15	protein_coding	Y
	PF		VFRLQFDEF	9		0.2549	Canonical	BTRC	ENSG00000166167.18	protein_coding
	PF		VFRLQFDEF	9		0.2549	Canonical	FBXW11	ENSG00000072803.17	protein_coding
	0.01	3.11	VYQNHVQHL	9		0.0042	Canonical	ARHGAP5	ENSG00000100852.13	protein_coding	Y
	0.01	1.68	FYMDTSHLF	9		0.0018	Canonical	PRRC2C	ENSG00000117523.16	protein_coding	Y
	0.01	2.03	IYIAGHPAF	9		0.0069	Canonical	HNRNPL	ENSG00000104824.17	protein_coding	Y
	0.01	2.03	IYIAGHPAF	9		0.0069	Canonical	HNRNPLP2	ENSG00000259917.1	unprocessed_pseudogene	Y
	PF		YYLNDLERI	9		0.0657	Canonical	GNAI2	ENSG00000114353.17	protein_coding
	0.01	2.1	EYATKISRF	9		0.0304	Canonical	PITHD1	ENSG00000057757.10	protein_coding	Y
	PF		YYLNDLERI	9		0.0657	Canonical	GNAZ	ENSG00000128266.9	protein_coding
	0.01	1.74	IYLLIHNNF	9		0.0087	Canonical	CD53	ENSG00000143119.14	protein_coding	Y
	0.01	2.1	RYVEIVSQF	9		0.0016	Canonical	VPS41	ENSG00000006715.16	protein_coding	Y
	PF		VYVVGTAHF	9		0.0057	Canonical	TRABD	ENSG00000170638.9	protein_coding
	0.01	1.92	AYALLLQHL	9		0.0294	Canonical	SLC26A6	ENSG00000225697.13	protein_coding	Y
	0.01	2.03	TYLKAVKLF	9		0.0037	Canonical	IREB2	ENSG00000136381.13	protein_coding	Y
	0.01	2.75	VYSHVIQKL	9		0.0035	Canonical	SDS	ENSG00000135094.11	protein_coding	Y
	0.01	1.78	VYQLRFQFL	9		0.0184	Canonical	POLR1A	ENSG00000068654.16	protein_coding	Y
	PF		KYIESPVLF	9		0.001	Canonical	TTLL12	ENSG00000100304.13	protein_coding
	0.01	1.98	RYIEELQKF	9		0.0009	Canonical	RALGPS1	ENSG00000136828.19	protein_coding	Y
	PF		RYFNSSAFF	9		0.0125	Canonical	CFTR	ENSG00000001626.15	protein_coding
	0.01	1.96	VYLPLTSHI	9		0.0056	Canonical	SNX8	ENSG00000106266.11	protein_coding	Y
	0.01	2.2	SYIQRLVQI	9		0.0154	Canonical	SAMHD1	ENSG00000101347.9	protein_coding	Y
	0.01	1.78	NYIMKIHNF	9		0.004	Canonical	ADNP	ENSG00000101126.17	protein_coding	Y
	PF		RYLEKSIKM	9		0.0483	Canonical	NLN	ENSG00000123213.23	protein_coding
	0.01	3.13	SYLKDTKLW	9		0.0522	Canonical	STK24	ENSG00000102572.14	protein_coding	Y
	0.01	2.04	EYLENALKL	9		0.0858	Canonical	GBP4	ENSG00000162654.9	protein_coding	Y
	0.01	2.04	EYLENALKL	9		0.0858	Canonical	GBP7	ENSG00000213512.3	protein_coding	Y
	0.01	2.04	EYLENALKL	9		0.0858	Canonical	GBP6	ENSG00000183347.14	protein_coding	Y
	0.01	2.4	NYGRVFSEW	9		0.0338	Canonical	SNX4	ENSG00000114520.11	protein_coding	Y
	0.01	2.11	VYTSGVYHI	9		0.0071	Canonical	TNS2	ENSG00000111077.17	protein_coding	Y
	0.01	2.27	YYEHVKARF	9		0.0313	Canonical	MLPH	ENSG00000115648.14	protein_coding	Y
	0.05	1.99	RYLPQCSYF	9		0.0072	Canonical	CCND2	ENSG00000118971.8	protein_coding	N
	0.01	2.39	FYHKYFNYL	9		0.0489	Canonical	EXT2	ENSG00000151348.14	protein_coding	Y
	0.05	1.99	RYLPQCSYF	9		0.0072	Canonical	AC008012.1	ENSG00000285901.1	protein_coding	N
	0.01	1.79	RWFDKTLQF	9		0.0077	Canonical	CRAT	ENSG00000095321.17	protein_coding	Y
	0.05	0.99	IYVPVSLGF	9		0.006	Canonical	OVOL1	ENSG00000172818.10	protein_coding	Y
	0.01	2.51	EYALLYHTL	9		0.0244	Canonical	AOC1	ENSG00000002726.20	protein_coding	Y
	0.01	1.5	YYIDKLEYL	9		0.0096	Canonical	NET1	ENSG00000173848.19	protein_coding	Y
	0.01	2.06	VYEYVVERF	9		0.0123	Canonical	TUT4	ENSG00000134744.14	protein_coding	Y
	0.01	2.1	KYQPRIAVF	9		0.0036	Canonical	TDG	ENSG00000139372.15	protein_coding	Y
	0.01	1.96	VQPSLFYHL	9		0.2226	Canonical	MAP3K6	ENSG00000142733.17	protein_coding	Y
	0.01	2.2	LYQHEINLF	9		0.0083	Canonical	CEBPZ	ENSG00000115816.15	protein_coding	Y
	PF		TYESIFSHF	9		0.0055	Canonical	IL10RA	ENSG00000110324.10	protein_coding
	0.01	2.51	TYARNLPAF	9		0.0069	Canonical	TTI2	ENSG00000129696.12	protein_coding	Y
	0.01	2.34	KYQIINEEF	9		0.0063	Canonical	HPS3	ENSG00000163755.8	protein_coding	Y
	0.01	2.13	PYNPLWAQL	9		0.0434	Canonical	FNIP1	ENSG00000217128.12	protein_coding	Y
	0.01	2.13	PYNPLWAQL	9		0.0434	Canonical	FNIP2	ENSG00000052795.13	protein_coding	Y
	0.01	1.83	TYVENLRLL	9		0.0296	Canonical	SYNE2	ENSG00000054654.16	protein_coding	Y
	PF		RYLHSHHFL	9		0.0218	Canonical	VIRMA	ENSG00000164944.12	protein_coding
	0.01	2.52	NYIDKVRFL	9		0.0404	Canonical	VIM	ENSG00000026025.16	protein_coding	Y
	0.01	2.01	VYLHDFQRF	9		0.0016	Canonical	PLCG2	ENSG00000197943.10	protein_coding	Y
	0.01	2.66	VYQHLFTRI	9		0.0156	Canonical	AP5Z1	ENSG00000242802.9	protein_coding	Y
	0.05	1.75	RYQFIEEAF	9		0.03	Canonical	TRIM33	ENSG00000197323.12	protein_coding
	0.05	1.75	RYQFIEEAF	9		0.03	Canonical	TRIM24	ENSG00000122779.18	protein_coding
	0.01	1.98	IYQKAFDLI	9		0.0343	Canonical	KPNA5	ENSG00000196911.10	protein_coding	Y
	0.01	1.98	IYQKAFDLI	9		0.0343	Canonical	KPNA1	ENSG00000114030.13	protein_coding	Y
	0.01	1.98	IYQKAFDLI	9		0.0343	Canonical	KPNA6	ENSG00000025800.14	protein_coding	Y
	0.01	1.89	IYAPPLPSL	9		0.0073	Canonical	AKAP1	ENSG00000121057.13	protein_coding	Y
	0.01	2.71	TYAQRTQLF	9		0.0036	Canonical	MKLN1	ENSG00000128585.18	protein_coding	Y
	0.01	1.81	LYANMFERL	9		0.0425	Canonical	FKBP4	ENSG00000004478.8	protein_coding	Y
	0.01	3.01	RYLEKNVKL	9		0.0224	Canonical	TGS1	ENSG00000137574.10	protein_coding	Y
	0.01	2.33	AYVLNIVRF	9		0.0138	Canonical	ATP1B1	ENSG00000143153.12	protein_coding	Y
	PF		AYVELVHHI	9		0.0074	Canonical	CDK5RAP1	ENSG00000101391.21	protein_coding
	PF		VYKILSTHL	9		0.0569	Canonical	CLOCK	ENSG00000134852.15	protein_coding
	PF		KYPHYFPLL	9		0.0091	Canonical	AC006538.1	ENSG00000172009.15	protein_coding
	0.01	1.6	IYNSQREHF	9		0.0152	Canonical	SIPA1L1	ENSG00000197555.9	protein_coding	Y
	0.01	1.94	SYYSPSIGF	9		0.0157	Canonical	YTHDF2	ENSG00000198492.16	protein_coding	Y
	0.01	1.76	VYLPNINKI	9		0.0032	Canonical	RHOBTB1	ENSG00000072422.17	protein_coding	Y
	0.01	1.62	VYENVSHFL	9		0.0396	Canonical	SLC25A32	ENSG00000164933.12	protein_coding	Y
	0.01	1.62	VYENVSHFL	9		0.0396	Canonical	AC012213.5	ENSG00000285982.1	protein_coding	Y
	0.01	1.98	NYTLVSHLI	9		0.0586	Canonical	MARS	ENSG00000166986.15	protein_coding	Y
	0.01	1.56	NYAWVYYHL	9		0.0351	Canonical	IFIT3	ENSG00000119917.14	protein_coding	Y
	PF		RYKEKVAEL	9		0.0553	Canonical	KAT7	ENSG00000136504.12	protein_coding
	0.01	2.13	LYEKDIQLF	9		0.0256	Canonical	AKTIP	ENSG00000166971.17	protein_coding	Y
	0.01	2.13	LYEKDIQLF	9		0.0256	Canonical	AC010342.1	ENSG00000226432.3	processed_pseudogene	Y
	PF		IYNHITTRV	9		0.157	Canonical	ADD1	ENSG00000087274.17	protein_coding
	0.01	2.81	QYNPHVHQL	9		0.0073	Canonical	DLG5	ENSG00000151208.17	protein_coding	Y
	0.01	1.79	EYLKHHNRI	9		0.1577	Canonical	GZF1	ENSG00000125812.16	protein_coding	Y
	0.01	1.24	SYGDILHVI	9		0.0157	Canonical	DLG3	ENSG00000082458.12	protein_coding	Y
	0.01	1.94	EYTLMRATF	9		0.1115	Canonical	IRS2	ENSG00000185950.9	protein_coding	Y
	0.01	2.34	KYFHPPAHL	9		0.0193	Canonical	MBNL1	ENSG00000152601.17	protein_coding	Y
	0.01	2.34	KYFHPPAHL	9		0.0193	Canonical	MBNL2	ENSG00000139793.18	protein_coding	Y
	0.01	2.34	KYFHPPAHL	9		0.0193	Canonical	MBNL3	ENSG00000076770.14	protein_coding	Y
	0.01	2.52	KYDEIFYNL	9		0.0099	Canonical	EHD2	ENSG00000024422.12	protein_coding	Y
	0.01	2.49	TYLEKAIKI	9		0.0183	Canonical	USP7	ENSG00000187555.15	protein_coding	Y
	PF		KYFAQALKL	9		0.0255	Canonical	EMC2	ENSG00000104412.8	protein_coding
	0.01	2.22	KYLKVFYKF	9		0.002	Canonical	ZNF91	ENSG00000167232.14	protein_coding	Y
	0.01	2.22	KYLKVFYKF	9		0.002	Canonical	ZNF726	ENSG00000213967.10	protein_coding	Y
	0.01	2.22	KYLKVFYKF	9		0.002	Canonical	ZNF254	ENSG00000213096.10	protein_coding	Y
	0.01	2.14	AYLESFYKF	9		0.0009	Canonical	ATP6V0D1	ENSG00000159720.12	protein_coding	Y
	0.01	1.81	VYGPLPQSF	9		0.0008	Canonical	COX4I1	ENSG00000131143.8	protein_coding	Y
	PF		LYSSKLYRF	9		0.0041	Canonical	KCTD20	ENSG00000112078.14	protein_coding
	0.01	1.93	IYIKHPHLF	9		0.0004	Canonical	DNTTIP1	ENSG00000101457.13	protein_coding	Y
	0.01	2.47	QYTPHSHQF	9		0.0039	Canonical	RPTOR	ENSG00000141564.15	protein_coding	Y
	0.01	2.06	EYDLIVHQL	9		0.0932	Canonical	VPS26A	ENSG00000122958.15	protein_coding	Y
	0.01	1.39	VYNSEYYHF	9		0.001	Canonical	PTK7	ENSG00000112655.16	protein_coding	Y
	0.01	1.81	RYLRVEHHF	9		0.0035	Canonical	ACACB	ENSG00000076555.15	protein_coding	Y
	0.01	2.3	VYTLLTTHL	9		0.021	Canonical	C11orf80	ENSG00000173715.16	protein_coding	Y
	0.01	2	KYITKSFNF	9		0.0025	Canonical	PARN	ENSG00000140694.17	protein_coding	Y
	PF		RYPDNLKHL	9		0.0463	Canonical	CCDC59	ENSG00000133773.12	protein_coding
	0.01	1.95	SYQKVIELF	9		0.0012	Canonical	PBK	ENSG00000168078.10	protein_coding	Y
	PF		EYAAQLQRF	9		0.0171	Canonical	TRIP10	ENSG00000125733.18	protein_coding
	0.01	1.89	TYNRIINQI	9		0.0204	Canonical	ANGPTL2	ENSG00000136859.10	protein_coding	Y
	PF		TYLKKIPGF	9		0.0058	Canonical	SERINC3	ENSG00000132824.14	protein_coding
	0.01	2.26	VYIEKNDKL	9		0.0388	Canonical	ERBB3	ENSG00000065361.15	protein_coding	Y
	0.05	0.83	TYGERFCYL	9		0.1412	Canonical	DPY19L4	ENSG00000156162.16	protein_coding	Y
	0.01	1.64	EYMEHVYLI	9		0.0158	Canonical	OSBPL2	ENSG00000130703.16	protein_coding	Y
	0.01	1.95	RYTQDLGAF	9		0.2099	Canonical	CLCN2	ENSG00000114859.16	protein_coding	Y
	PF		VYSAGVYRL	9		0.0105	Canonical	ANAPC2	ENSG00000176248.9	protein_coding
	0.01	1.94	VYMDWYEKF	9		0.0009	Canonical	SNRNP200	ENSG00000144028.15	protein_coding	Y
	0.01	1.69	KYKEAAHLL	9		0.0117	Canonical	KLC4	ENSG00000137171.15	protein_coding	Y
	0.01	1.69	KYKEAAHLL	9		0.0117	Canonical	KLC2	ENSG00000174996.11	protein_coding	Y
	0.01	2.25	QYTHKIYHL	9		0.0193	Canonical	PITPNB	ENSG00000180957.17	protein_coding	Y
	0.01	2.25	QYTHKIYHL	9		0.0193	Canonical	PITPNA	ENSG00000174238.14	protein_coding	Y
	PF		RYASINAHL	9		0.0301	Canonical	CSNK1A1	ENSG00000113712.18	protein_coding
	PF		RYASINAHL	9		0.0301	Canonical	CSNK1A1L	ENSG00000180138.7	protein_coding
	0.01	1.97	GYASRFIVI	9		0.2361	Canonical	RPIA	ENSG00000153574.9	protein_coding	Y
	0.01	2.42	HYAHLIKTF	9		0.0099	Canonical	DOCK1	ENSG00000150760.12	protein_coding	Y
	0.01	2.73	KYVKVFNKF	9		0.0016	Canonical	ZNF675	ENSG00000197372.9	protein_coding	Y
	PF		KYNLINEYF	9		0.0076	Canonical	HS2ST1	ENSG00000153936.17	protein_coding
	PF		KYNLINEYF	9		0.0076	Canonical	AC093155.3	ENSG00000267561.2	protein_coding
	PF		IYLSKPTHW	9		0.0066	Canonical	POLR2B	ENSG00000047315.16	protein_coding
	0.01	2.49	KYVKDFHKF	9		0.0014	Canonical	ZNF724	ENSG00000196081.9	protein_coding	Y
	0.01	2.49	KYVKDFHKF	9		0.0014	Canonical	AC092329.3	ENSG00000283201.1	protein_coding	Y
	0.01	2.41	RYQTKFRHL	9		0.0393	Canonical	CEP89	ENSG00000121289.18	protein_coding	Y
	0.01	2.64	RYQEVDRRF	9		0.0152	Canonical	YTHDC1	ENSG00000083896.12	protein_coding	Y
	0.01	1.75	TYITSVSRL	9		0.0306	Canonical	OSGIN2	ENSG00000164823.11	protein_coding	Y
	0.01	2.03	SYLNSVQRL	9		0.0126	Canonical	NUPL2	ENSG00000136243.17	protein_coding	Y
	0.01	2.14	RYQDIIHSI	9		0.003	Canonical	BAZ1B	ENSG00000009954.11	protein_coding	Y
	0.01	2.48	VYLDKFIRL	9		0.0043	Canonical	GNL3L	ENSG00000130119.16	protein_coding	Y
	0.01	2.48	VYLDKFIRL	9		0.0043	Canonical	GNL3LP1	ENSG00000215032.2	processed_pseudogene	Y
	0.01	2.48	VYLDKFIRL	9		0.0043	Canonical	ERCC8	ENSG00000049167.14	protein_coding	Y
	0.01	2.27	EYPKFLKRF	9		0.0231	Canonical	COL4A3BP	ENSG00000113163.16	protein_coding	Y
	0.01	1.99	TYDYNFHSF	9		0.0045	Canonical	ASH1L	ENSG00000116539.13	protein_coding	Y
	PF		YYAKEIHKF	9		0.0006	Canonical	TGFB3	ENSG00000119699.7	protein_coding
	0.01	2.44	VYSFGFERL	9		0.0508	Canonical	SLC30A6	ENSG00000152683.14	protein_coding	Y
	0.01	3.1	KYLGQLHYL	9		0.0087	Canonical	PTPN23	ENSG00000076201.15	protein_coding	Y
	0.01	1.5	VYNAVANLW	9		0.0251	Canonical	SMPDL3A	ENSG00000172594.13	protein_coding	Y
	0.01	2.54	SYLTIHHRI	9		0.008	Canonical	RBAK	ENSG00000146587.18	protein_coding	Y
	0.01	2.54	SYLTIHHRI	9		0.008	Canonical	ZNF12	ENSG00000164631.19	protein_coding	Y
	0.01	1.94	TYQSITERI	9		0.0176	Canonical	EXOC4	ENSG00000131558.15	protein_coding	Y
	0.01	1.99	IYTRLLPAL	9		0.1304	Canonical	ABHD14A-ACY1	ENSG00000114786.16	protein_coding	Y
	0.01	1.99	IYTRLLPAL	9		0.1304	Canonical	ACY1	ENSG00000243989.9	protein_coding	Y
	0.01	2.08	IYIINVHSM	9		0.0298	Canonical	DENND3	ENSG00000105339.10	protein_coding	Y
	0.01	2.16	IYIKQIKTF	9		0.0017	Canonical	RBL2	ENSG00000103479.16	protein_coding	Y
	0.01	2.35	EYMKHTRLF	9		0.0134	Canonical	FLII	ENSG00000177731.16	protein_coding	Y
	PF		YYAEVETRI	9		0.0579	Canonical	EXOC2	ENSG00000112685.14	protein_coding
	0.01	1.94	NYLSIFRKF	9		0.0043	Canonical	CAPN1	ENSG00000014216.15	protein_coding	Y
	0.01	2.34	LYDIILKNF	9		0.0441	Canonical	PSME1	ENSG00000092010.15	protein_coding	Y
	PF		TYLNYVVHL	9		0.0101	Canonical	ZNF292	ENSG00000188994.13	protein_coding
	0.01	1.96	RYDEIRRHW	9		0.0378	Canonical	RPL7A	ENSG00000148303.17	protein_coding	Y
	0.01	1.96	RYDEIRRHW	9		0.0378	Canonical	RPL7AP6	ENSG00000242071.3	processed_pseudogene	Y
	0.01	1.96	RYDEIRRHW	9		0.0378	Canonical	RPL7AP66	ENSG00000175886.10	processed_pseudogene	Y
	0.01	1.96	RYDEIRRHW	9		0.0378	Canonical	RPL7AP53	ENSG00000235962.5	processed_pseudogene	Y
	0.01	1.96	RYDEIRRHW	9		0.0378	Canonical	AC044787.1	ENSG00000213862.4	processed_pseudogene	Y
	0.01	1.96	RYDEIRRHW	9		0.0378	Canonical	AC000089.1	ENSG00000235776.2	processed_pseudogene	Y
	0.01	2.05	EYLADLYHF	9		0.0089	Canonical	SH3BP1	ENSG00000100092.23	protein_coding	Y
	0.01	2.05	EYLADLYHF	9		0.0089	Canonical	Z83844.3	ENSG00000285304.1	protein_coding	Y
	0.01	2.76	VYAKLLHRY	9		0.1219	Canonical	FBXO31	ENSG00000103264.18	protein_coding	Y
	PF		GYTSRWYHL	9		0.1076	Canonical	KDM1B	ENSG00000165097.15	protein_coding
	0.01	2.04	AYSRVQYQF	9		0.0045	Canonical	BCAR3	ENSG00000137936.18	protein_coding	Y
	0.05	1.56	RFEEKHAYF	9		0.1087	Canonical	CRNKL1	ENSG00000101343.14	protein_coding	Y
	0.01	1.69	IYFEYSHAF	9		0.0023	Canonical	MSH3	ENSG00000113318.11	protein_coding	Y
	0.01	2.15	LYGRHFNYL	9		0.0895	Canonical	TENT4B	ENSG00000121274.12	protein_coding	Y
	PF		KFAEEFYSF	9		0.007	Canonical	CDCA7L	ENSG00000164649.20	protein_coding
	0.01	2.3	GYIERPQLI	9		0.0445	Canonical	TENT2	ENSG00000164329.13	protein_coding	Y
	0.01	1.76	TYKDYVDLF	9		0.0064	Canonical	PRKDC	ENSG00000253729.7	protein_coding	Y
	PF		KYKDIQDKL	9		0.0421	Canonical	SMC6	ENSG00000163029.16	protein_coding
	0.01	2.41	VQNGKHFKF	9		0.3195	Canonical	FABP1	ENSG00000163586.9	protein_coding	Y
	0.01	2.12	VYVSRPSHF	9		0.0043	Canonical	STAT2	ENSG00000170581.14	protein_coding	Y
	0.01	2.13	TYQDIFRDF	9		0.0077	Canonical	ACAP2	ENSG00000114331.14	protein_coding	Y
	PF		KFNPVSFTW	9		0.0199	Canonical	KLHDC3	ENSG00000124702.18	protein_coding
	PF		RWPKKSAEF	9		0.041	Canonical	RPL17-C18orf32	ENSG00000215472.10	protein_coding
	PF		RWPKKSAEF	9		0.041	Canonical	RPL17	ENSG00000265681.7	protein_coding
	PF		RWPKKSAEF	9		0.041	Canonical	AC113935.1	ENSG00000226084.5	processed_pseudogene
	PF		RWPKKSAEF	9		0.041	Canonical	AL049597.1	ENSG00000230721.1	processed_pseudogene
	PF		RWPKKSAEF	9		0.041	Canonical	BX679664.3	ENSG00000244716.3	processed_pseudogene
	PF		RWPKKSAEF	9		0.041	Canonical	AC064799.1	ENSG00000212664.5	processed_pseudogene
	PF		HYAALAHYF	9		0.0065	Canonical	RHPN2	ENSG00000131941.8	protein_coding
	PF		HYAALAHYF	9		0.0065	Canonical	AC142384.1	ENSG00000259882.2	unprocessed_pseudogene
	0.01	3.13	RYNEKCFKL	9		0.041	Canonical	KLHL24	ENSG00000114796.16	protein_coding	Y
	0.01	3.1	KYPNVFKKI	9		0.0193	Canonical	AHCYL1	ENSG00000168710.18	protein_coding	Y
	0.01	2.03	QYMELFNKI	9		0.0121	Canonical	MED20	ENSG00000124641.16	protein_coding	Y
	0.05	1.18	VYNPTPNSL	9		0.0089	Canonical	COL12A1	ENSG00000111799.21	protein_coding	Y
	0.01	1.93	LYEEINQVF	9		0.0367	Canonical	CYP20A1	ENSG00000119004.15	protein_coding	N
	PF		SYMPTVSHL	9		0.0035	Canonical	BSCL2	ENSG00000168000.14	protein_coding
	PF		SYMPTVSHL	9		0.0035	Canonical	HNRNPUL2-BSCL2	ENSG00000234857.2	protein_coding
	0.01	1.33	EYDNFFQHL	9		0.1092	Canonical	CLASP1	ENSG00000074054.18	protein_coding	Y
	0.01	2.05	IYSIDFTRF	9		0.0059	Canonical	UNC119B	ENSG00000175970.11	protein_coding	Y
	PF		IYNPTTGEF	9		0.0075	Canonical	ATP1B3	ENSG00000069849.11	protein_coding
	0.01	2.17	KYNANFVTF	9		0.0012	Canonical	KDM2A	ENSG00000173120.15	protein_coding	Y
	0.01	1.54	LYTEKFEEF	9		0.0038	Canonical	TXLNA	ENSG00000084652.16	protein_coding	Y
	0.05	2.22	RYAVEILTW	9		0.0135	Canonical	UBR2	ENSG00000024048.10	protein_coding	Y
	0.01	1.95	KYPENFFLL	9		0.0036	Canonical	PPP1CA	ENSG00000172531.15	protein_coding	Y
	0.01	1.95	KYPENFFLL	9		0.0036	Canonical	PPP1CC	ENSG00000186298.11	protein_coding	Y
	0.01	1.95	KYPENFFLL	9		0.0036	Canonical	PPP1CB	ENSG00000213639.10	protein_coding	Y
	0.01	2.02	SYLDRTEQL	9		0.0191	Canonical	WDR18	ENSG00000065268.10	protein_coding	Y
	0.01	1.72	SYSSTFHSL	9		0.007	Canonical	NBPF20	ENSG00000162825.16	protein_coding	Y
	0.01	1.72	SYSSTFHSL	9		0.007	Canonical	NBPF10	ENSG00000271425.8	protein_coding	Y
	0.01	1.72	SYSSTFHSL	9		0.007	Canonical	NBPF19	ENSG00000271383.7	protein_coding	Y
	0.01	1.72	SYSSTFHSL	9		0.007	Canonical	AC242842.3	ENSG00000286185.1	protein_coding	Y
	0.01	1.72	SYSSTFHSL	9		0.007	Canonical	NBPF14	ENSG00000270629.6	protein_coding	Y
	0.01	1.72	SYSSTFHSL	9		0.007	Canonical	NBPF12	ENSG00000268043.7	protein_coding	Y
	0.01	1.72	SYSSTFHSL	9		0.007	Canonical	NBPF26	ENSG00000273136.7	protein_coding	Y
	0.01	1.72	SYSSTFHSL	9		0.007	Canonical	NBPF8	ENSG00000270231.4	transcribed_unprocessed_pseudogene	Y
	0.01	1.72	SYSSTFHSL	9		0.007	Canonical	NBPF9	ENSG00000269713.7	protein_coding	Y
	0.01	1.72	SYSSTFHSL	9		0.007	Canonical	NBPF11	ENSG00000263956.6	protein_coding	Y
	0.01	1.72	SYSSTFHSL	9		0.007	Canonical	NBPF15	ENSG00000266338.6	protein_coding	Y
	0.01	1.72	SYSSTFHSL	9		0.007	Canonical	NBPF25P	ENSG00000272150.5	transcribed_unprocessed_pseudogene	Y
	PF		VYSQILRKL	9		0.0153	Canonical	NUP85	ENSG00000125450.11	protein_coding
	PF		KYNPTWHCI	9		0.0339	Canonical	DYNLL2	ENSG00000264364.3	protein_coding
	PF		KYNPTWHCI	9		0.0339	Canonical	DYNLL1	ENSG00000088986.11	protein_coding
	0.05	1	SYMEVPTYL	9		0.0072	Canonical	LAPTM5	ENSG00000162511.8	protein_coding	Y
	0.01	2.35	RYALQMEQL	9		0.0866	Canonical	KRT18	ENSG00000111057.11	protein_coding	Y
	0.01	2.35	RYALQMEQL	9		0.0866	Canonical	KRT18P52	ENSG00000237007.4	processed_pseudogene	Y
	0.01	2.35	RYALQMEQL	9		0.0866	Canonical	KRT18P65	ENSG00000215807.4	processed_pseudogene	Y
	0.01	2.35	RYALQMEQL	9		0.0866	Canonical	KRT18P49	ENSG00000214720.4	processed_pseudogene	Y
	0.01	2.35	RYALQMEQL	9		0.0866	Canonical	KRT18P36	ENSG00000226246.1	processed_pseudogene	Y
	0.01	3.11	KYLSGIAHF	9		0.0022	Canonical	PMPCA	ENSG00000165688.12	protein_coding	Y
	0.01	2.49	SYIDVAVKL	9		0.0158	Canonical	TXNDC16	ENSG00000087301.9	protein_coding	Y
	PF		VYAQKHQQL	9		0.0124	Canonical	TRIM33	ENSG00000197323.12	protein_coding
	0.01	1.77	YYIFIPSKF	9		0.0027	Canonical	DDX47	ENSG00000213782.7	protein_coding	Y
	0.01	1.77	YYIFIPSKF	9		0.0027	Canonical	APOLD1	ENSG00000178878.12	protein_coding	Y
	0.01	2.24	VYTTMAEHF	9		0.0056	Canonical	TSPAN1	ENSG00000117472.10	protein_coding	Y
	0.01	1.39	EYNNNFHVL	9		0.0525	Canonical	IPMK	ENSG00000151151.6	protein_coding	Y
	0.01	1.39	EYNNNFHVL	9		0.0525	Canonical	IPMKP1	ENSG00000226507.1	processed_pseudogene	Y
	0.01	1.74	GYIESVQHI	9		0.0296	Canonical	MGME1	ENSG00000125871.14	protein_coding	Y
	0.01	2.3	KYVKVFHQF	9		0.0006	Canonical	ZNF486	ENSG00000256229.8	protein_coding	Y
	0.01	2.3	KYVKVFHQF	9		0.0006	Canonical	ZNF826P	ENSG00000231205.11	transcribed_unprocessed_pseudogene	Y
	0.01	1.53	TYISWKEEL	9		0.0508	Canonical	VPS13C	ENSG00000129003.18	protein_coding	Y
	0.01	2.18	AYLEAIHNF	9		0.0008	Canonical	AP2S1	ENSG00000042753.11	protein_coding	Y
	0.01	2.52	DYSSILQKF	9		0.0097	Canonical	FNBP1	ENSG00000187239.17	protein_coding	Y
	0.01	2.36	VYVQHPITF	9		0.0012	Canonical	LITAF	ENSG00000189067.12	protein_coding	Y
	0.01	1.34	IYDSVKVYF	9		0.0055	Canonical	SLC25A3	ENSG00000075415.12	protein_coding	Y
	0.01	2.32	YYQNYFEKL	9		0.0118	Canonical	PATL1	ENSG00000166889.14	protein_coding	Y
	0.01	2.32	YYQNYFEKL	9		0.0118	Canonical	AC007842.1	ENSG00000269069.1	processed_pseudogene	Y
	0.01	3.2	NYLNHWNHF	9		0.005	Canonical	FN3K	ENSG00000167363.14	protein_coding	Y
	0.01	1.72	IYKIDFVRF	9		0.0113	Canonical	UNC119	ENSG00000109103.11	protein_coding	Y
	PF		AYHNWRHAF	9		0.049	Canonical	PDE5A	ENSG00000138735.16	protein_coding
	0.01	1.73	VYPPIRHHL	9		0.0076	Canonical	VPS37A	ENSG00000155975.10	protein_coding	Y
	0.01	2.05	KYITDVVKL	9		0.0151	Canonical	UTP20	ENSG00000120800.5	protein_coding	Y
	0.01	2.04	VYSPHVLNL	9		0.0042	Canonical	DNM2	ENSG00000079805.16	protein_coding	Y
	0.01	2.04	VYSPHVLNL	9		0.0042	Canonical	DNM3	ENSG00000197959.14	protein_coding	Y
	0.01	1.68	YYFDSYAHF	9		0.0013	Canonical	PRMT8	ENSG00000111218.11	protein_coding	Y
	0.01	1.68	YYFDSYAHF	9		0.0013	Canonical	PRMT1	ENSG00000126457.21	protein_coding	Y
	0.01	1.68	YYFDSYAHF	9		0.0013	Canonical	PRMT1P1	ENSG00000270706.1	processed_pseudogene	Y
	0.01	2.04	VYSPHVLNL	9		0.0042	Canonical	DNM1	ENSG00000106976.20	protein_coding	Y
	0.01	2.07	EYVEKFYRI	9		0.0233	Canonical	RAD50	ENSG00000113522.14	protein_coding	Y
	0.01	2.07	EYVEKFYRI	9		0.0233	Canonical	AC116366.3	ENSG00000283782.2	protein_coding	Y
	0.01	2.4	IYSTKLYRF	9		0.0023	Canonical	BTBD10	ENSG00000148925.10	protein_coding	Y
	0.01	2.4	IYSTKLYRF	9		0.0023	Canonical	BTBD10P1	ENSG00000257675.1	processed_pseudogene	Y
	0.01	1.38	VYVDKVEKM	9	1xOxidation [M9]	0.0198	Canonical	AMOT	ENSG00000126016.15	protein_coding	Y
	0.01	1.64	SYPDNFLHI	9		0.0107	Canonical	ATG5	ENSG00000057663.16	protein_coding	Y
	0.01	2.63	TYKVISNEF	9		0.0161	Canonical	UBE3A	ENSG00000114062.20	protein_coding	Y
	0.01	2.63	TYKVISNEF	9		0.0161	Canonical	UBE3AP2	ENSG00000228941.1	processed_pseudogene	Y
	0.01	1.88	VYDVVELKF	9		0.0152	Canonical	CPSF7	ENSG00000149532.15	protein_coding	Y
	0.01	2.32	AYTLLLHTW	9		0.0181	Canonical	DOCK2	ENSG00000134516.17	protein_coding	Y
	PF		AYLNITKHL	9		0.0498	Canonical	POLK	ENSG00000122008.15	protein_coding
	PF	1.17	KYPEIKSLM	9		0.0586	Canonical	DEGS1	ENSG00000143753.13	protein_coding
	0.05	1.29	AYKYIQELW	9		0.0544	Canonical	RPL15	ENSG00000174748.21	protein_coding	Y
	0.05	1.29	AYKYIQELW	9		0.0544	Canonical	RPL15P3	ENSG00000212802.4	processed_pseudogene	Y
	0.05	1.29	AYKYIQELW	9		0.0544	Canonical	AC092865.1	ENSG00000243830.2	processed_pseudogene	Y
	0.05	1.29	AYKYIQELW	9		0.0544	Canonical	AC092597.1	ENSG00000242262.1	processed_pseudogene	Y
	0.05	1.29	AYKYIQELW	9		0.0544	Canonical	AP000797.2	ENSG00000244259.1	processed_pseudogene	Y
	0.05	1.29	AYKYIQELW	9		0.0544	Canonical	RPL15P2	ENSG00000240914.1	processed_pseudogene	Y
	PF		VFYPYPQYF	9		0.003	Canonical	HSDL1	ENSG00000103160.12	protein_coding
	0.05	1.4	KYRRYHPLF	9		0.0753	Canonical	ARAP1	ENSG00000186635.14	protein_coding	Y
	0.01	1.8	NYTKAMRLF	9		0.034	Canonical	ADI1	ENSG00000182551.14	protein_coding	Y
	0.05	1.32	NYSPYVNYF	9		0.0032	Canonical	DPY19L4	ENSG00000156162.16	protein_coding	Y
	0.01	1.89	NYLSHHLTI	9		0.0208	Canonical	PAIP1	ENSG00000172239.14	protein_coding	Y
	0.01	1.89	NYLSHHLTI	9		0.0208	Canonical	AC026271.1	ENSG00000174977.8	processed_pseudogene	Y
	0.05	1.49	GYSEHFVEF	9		0.0059	Canonical	GMPR2	ENSG00000100938.17	protein_coding	Y
	0.05	1.49	GYSEHFVEF	9		0.0059	Canonical	GMPR	ENSG00000137198.9	protein_coding	Y
	0.01	1.83	RISLPLPNF	9		0.8779	Canonical	VIM	ENSG00000026025.16	protein_coding	Y
	PF		KYTTLIAKL	9		0.0296	Canonical	TES	ENSG00000135269.18	protein_coding
	0.01	1.73	TYMKDLYQL	9		0.008	Canonical	ARHGAP18	ENSG00000146376.11	protein_coding	Y
	PF		RYLSKVLEL	9		0.0082	Canonical	C15orf40	ENSG00000169609.14	protein_coding
	PF		TYSYVPPQW	9		0.0167	Canonical	FAM168B	ENSG00000152102.18	protein_coding
	0.01	2.05	AYLLNLNHL	9		0.0485	Canonical	TRAM1	ENSG00000067167.8	protein_coding	Y
	0.01	1.7	KYMAEALLL	9		0.0211	Canonical	TOMM70	ENSG00000154174.7	protein_coding	Y
	PF		NYDKVEKLF	9		0.0672	Canonical	CSTF3	ENSG00000176102.13	protein_coding
	0.05	2	RYLELISSI	9		0.0233	Canonical	IFT122	ENSG00000163913.11	protein_coding	Y
	PF		RYLDEINLL	9		0.0111	Canonical	GNA15	ENSG00000060558.3	protein_coding
	PF		SYGDILHRM	9		0.0292	Canonical	INTS10	ENSG00000104613.12	protein_coding
	0.05	2.13	KYNDNFFGL	9		0.0434	Canonical	UBR7	ENSG00000012963.15	protein_coding	Y
	0.05	2.13	KYNDNFFGL	9		0.0434	Canonical	AL110118.2	ENSG00000259066.5	protein_coding	Y
	0.05	1.75	EYTDVYPEI	9		0.1212	Canonical	MAGED1	ENSG00000179222.17	protein_coding	Y
	0.05	1.75	EYTDVYPEI	9		0.1212	Canonical	MAGED2	ENSG00000102316.17	protein_coding	Y
	0.01	2.39	RYLQTLTTI	9		0.0189	Canonical	STOM	ENSG00000148175.12	protein_coding	Y
	0.01	2.31	RYIANTVEL	9		0.022	Canonical	RPN2	ENSG00000118705.17	protein_coding	Y
	0.01	2.54	RYIDRIHIF	9		0.0008	Canonical	PRPF8	ENSG00000174231.17	protein_coding	Y
	0.01	1.65	VYLPTHTSL	9		0.0075	Canonical	MYLIP	ENSG00000007944.15	protein_coding	Y
	PF		VYPPHSHSI	9		0.0078	Canonical	STAT6	ENSG00000166888.12	protein_coding
	0.01	1.75	VFSTVVIHF	9		0.0162	Canonical	HMGCR	ENSG00000113161.16	protein_coding	Y
	PF		KYIKEAVRL	9		0.0153	Canonical	FRMD6	ENSG00000139926.15	protein_coding
	0.01	2.09	IYVHDLLTF	9		0.0076	Canonical	VPS39	ENSG00000166887.15	protein_coding	Y
	0.01	1.69	AYTSPPSFF	9		0.0158	Canonical	SYNPO2	ENSG00000172403.11	protein_coding	Y
	0.01	2.34	EFVAKGHLF	9		0.1838	Canonical	MED18	ENSG00000130772.14	protein_coding	Y
	0.01	2.48	RFIGATANF	9		0.0369	Canonical	RNASEH2C	ENSG00000172922.9	protein_coding	Y
	0.05	1.96	VYQHGLTGF	9		0.0223	Canonical	BAK1	ENSG00000030110.13	protein_coding	Y
	0.05	1.96	VYQHGLTGF	9		0.0223	Canonical	BAK1P2	ENSG00000236616.3	processed_pseudogene	Y
	PF		KYMEDVTQI	9		0.0162	Canonical	PPM1D	ENSG00000170836.11	protein_coding
	0.01	2.23	YYQHIVTTL	9		0.0062	Canonical	PCYOX1	ENSG00000116005.12	protein_coding	Y
	0.01	2.39	RYLTVATVF	9		0.0125	Canonical	AC092143.1	ENSG00000198211.8	protein_coding	Y
	0.01	2.39	RYLTVATVF	9		0.0125	Canonical	TUBB3	ENSG00000258947.7	protein_coding	Y
	0.01	2.39	RYLTVATVF	9		0.0125	Canonical	TUBB6	ENSG00000176014.12	protein_coding	Y
	PF		KYCQVIRVI	9		0.2185	Canonical	RPL3	ENSG00000100316.16	protein_coding
	PF		KYCQVIRVI	9		0.2185	Canonical	RPL3P12	ENSG00000232496.2	processed_pseudogene
	PF		RYKAPFHQL	9		0.0089	Canonical	SMARCA1	ENSG00000102038.15	protein_coding
	PF		RYKAPFHQL	9		0.0089	Canonical	SMARCA5	ENSG00000153147.6	protein_coding
	0.01	2.3	KYQELQVLF	9		0.0018	Canonical	VPS37B	ENSG00000139722.7	protein_coding	Y
	0.01	2.3	KYQELQVLF	9		0.0018	Canonical	AC027290.2	ENSG00000280138.1	TEC	Y
	0.01	2.23	RYLTVAAVF	9		0.0181	Canonical	TUBB4B	ENSG00000188229.6	protein_coding	Y
	0.01	2.23	RYLTVAAVF	9		0.0181	Canonical	TUBB	ENSG00000196230.13	protein_coding	Y
	0.01	2.23	RYLTVAAVF	9		0.0181	Canonical	TUBB4A	ENSG00000104833.12	protein_coding	Y
	0.01	2.23	RYLTVAAVF	9		0.0181	Canonical	TUBBP2	ENSG00000214222.2	processed_pseudogene	Y
	PF		KYPLLLDNI	9		0.1207	Canonical	ARHGEF12	ENSG00000196914.9	protein_coding
	PF		IYPMKNHMF	9		0.0095	Canonical	RALGAPA1	ENSG00000174373.16	protein_coding
	PF		IYPMKNHMF	9		0.0095	Canonical	RALGAPA2	ENSG00000188559.15	protein_coding
	PF		IYPMKNHMF	9		0.0095	Canonical	RALGAPA1P1	ENSG00000229419.1	processed_pseudogene
	PF		VYVKDLSSF	9		0.0079	Canonical	KIF3B	ENSG00000101350.8	protein_coding
	0.01	2.17	KYAALFSQM	9		0.0622	Canonical	SAMD4A	ENSG00000020577.13	protein_coding	Y
	0.01	2.17	KYAALFSQM	9		0.0622	Canonical	SAMD4B	ENSG00000179134.15	protein_coding	Y
	PF		RYFENPQVI	9		0.0186	Canonical	TRRAP	ENSG00000196367.13	protein_coding
	0.01	2.02	RYNPNLNTW	9		0.0066	Canonical	KLHL11	ENSG00000178502.6	protein_coding	Y
	PF	1.19	PYLDSFYEY	9		0.2067	Canonical	RNF103	ENSG00000239305.7	protein_coding
	0.01	1.93	KYIDQKFVL	9		0.0343	Canonical	PPP2R5D	ENSG00000112640.15	protein_coding	Y
	0.01	1.93	KYIDQKFVL	9		0.0343	Canonical	PPP2R5C	ENSG00000078304.19	protein_coding	Y
	0.01	1.93	KYIDQKFVL	9		0.0343	Canonical	PPP2R5E	ENSG00000154001.14	protein_coding	Y
	0.01	1.93	KYIDQKFVL	9		0.0343	Canonical	AC009263.1	ENSG00000234639.1	processed_pseudogene	Y
	PF		FYRSYFSQF	9		0.0322	Canonical	PXK	ENSG00000168297.15	protein_coding
	0.01	2.18	KYFLKPEVL	9		0.039	Canonical	NCEH1	ENSG00000144959.10	protein_coding	Y
	0.01	1.79	IYGLLKNPF	9		0.1365	Canonical	YME1L1	ENSG00000136758.18	protein_coding	Y
	0.01	2.3	LYRLQFNEF	9		0.1017	Canonical	ARL4AP1	ENSG00000122872.8	processed_pseudogene	Y
	0.01	2.3	LYRLQFNEF	9		0.1017	Canonical	ARL4A	ENSG00000122644.13	protein_coding	Y
	0.01	2.3	LYRLQFNEF	9		0.1017	Canonical	ARL4AP2	ENSG00000248780.1	processed_pseudogene	Y
	0.01	2.15	VYGSFASKL	9		0.0593	Canonical	AZIN1	ENSG00000155096.14	protein_coding	Y
	0.01	2.29	VYDTVFKHF	9		0.0037	Canonical	SP140L	ENSG00000185404.16	protein_coding	Y
	0.01	1.96	VYADQPHIF	9		0.0021	Canonical	ABHD4	ENSG00000100439.10	protein_coding	Y
	0.01	2.29	RWFDKSFTF	9		0.0046	Canonical	CPT1A	ENSG00000110090.13	protein_coding	Y
	0.01	2.01	RYIRDAHTF	9		0.0023	Canonical	ARHGAP35	ENSG00000160007.18	protein_coding	Y
	0.01	2.4	EYIRSLNQF	9		0.0097	Canonical	RMC1	ENSG00000141452.9	protein_coding	N
	PF		VYLHLRQTW	9		0.0181	Canonical	SLC44A2	ENSG00000129353.15	protein_coding
	0.01	1.95	LYLDEAHSI	9		0.0356	Canonical	SPTLC2	ENSG00000100596.6	protein_coding	Y
	0.01	1.95	LYLDEAHSI	9		0.0356	Canonical	SPTLC3	ENSG00000172296.13	protein_coding	Y
	0.01	2.22	TYVSGTLRF	9		0.0064	Canonical	CEPT1	ENSG00000134255.14	protein_coding	Y
	0.05	1.78	KYGALVNNF	9		0.0048	Canonical	NSUN4	ENSG00000117481.10	protein_coding	Y
	PF		KYTHFIQSF	9		0.0029	Canonical	GBGT1	ENSG00000148288.13	protein_coding
	PF		KYIQRQQTI	9		0.0095	Canonical	MX2	ENSG00000183486.13	protein_coding
	0.01	2.07	RYIPTAAAF	9		0.007	Canonical	SEC61A1	ENSG00000058262.10	protein_coding	Y
	0.01	2.07	RYIPTAAAF	9		0.007	Canonical	SEC61A2	ENSG00000065665.21	protein_coding	Y
	PF		KFSNVTMLF	9		0.0207	Canonical	GUCY1A1	ENSG00000164116.16	protein_coding
	0.01	2.36	KYVTVYNLI	9		0.0308	Canonical	USP8	ENSG00000138592.14	protein_coding	Y
	0.01	2.02	RYPTSIASL	9		0.0333	Canonical	BUB3	ENSG00000154473.18	protein_coding	Y
	PF		IYRAQLELF	9		0.0172	Canonical	FAM126B	ENSG00000155744.9	protein_coding
	0.05	1.71	TYQVLAVTF	9		0.0062	Canonical	SNRNP40	ENSG00000060688.13	protein_coding	Y
	0.05	1.3	VQPRNWLLF	9		0.1293	Canonical	MPC1	ENSG00000060762.19	protein_coding	Y
	PF		RYNPRTNQW	9		0.019	Canonical	KLHL20	ENSG00000076321.11	protein_coding
	0.05	1.74	SYANVQDGF	9		0.0813	Canonical	ANKRD22	ENSG00000152766.6	protein_coding	Y
	0.01	1.93	RYSGNQVLF	9		0.0071	Canonical	AC008695.1	ENSG00000273217.1	protein_coding	Y
	0.01	1.93	RYSGNQVLF	9		0.0071	Canonical	RAPGEF6	ENSG00000158987.20	protein_coding	Y
	0.01	2.34	RYSEYAEEF	9		0.0061	Canonical	MTMR6	ENSG00000139505.11	protein_coding	Y
	PF		IYAHITKHY	9		0.293	Canonical	FOXK1	ENSG00000164916.11	protein_coding
	PF		IWISKLPHF	9		0.0127	Canonical	TDRD7	ENSG00000196116.8	protein_coding
	0.01	1.33	IYGAPGVEF	9		0.0075	Canonical	LLGL1	ENSG00000131899.11	protein_coding
	0.01	1.33	IYGAPGVEF	9		0.0075	Canonical	LLGL2	ENSG00000073350.13	protein_coding
	0.01	1.14	GYPEVALHF	9		0.0048	Canonical	COPA	ENSG00000122218.16	protein_coding	Y
	0.01	1.52	VLPSSLPTF	9		0.0367	Canonical	MUC5B	ENSG00000117983.17	protein_coding	Y
	0.01	1.57	AYSHLRYVF	9		0.0241	Canonical	FAT1	ENSG00000083857.14	protein_coding	Y
	0.01	2.27	RYFKGPELL	9		0.0131	Canonical	CSNK2A1	ENSG00000101266.19	protein_coding	Y
	0.01	2.27	RYFKGPELL	9		0.0131	Canonical	CSNK2A3	ENSG00000254598.2	protein_coding	Y
	0.01	2.27	RYFKGPELL	9		0.0131	Canonical	CSNK2A2	ENSG00000070770.9	protein_coding	Y
	0.01	1.78	KYIEGVSDF	9		0.0084	Canonical	IPP	ENSG00000197429.10	protein_coding	Y
	PF		TYSKKHFRI	9		0.0457	Canonical	CHEK2	ENSG00000183765.22	protein_coding
	0.01	2.1	RYPDRITLI	9		0.0096	Canonical	PPP4C	ENSG00000149923.14	protein_coding	Y
	0.01	1.74	QYASAFHFL	9		0.0114	Canonical	BBS4	ENSG00000140463.14	protein_coding	Y
	0.01	2.12	LYIVHPTMF	9		0.0077	Canonical	ARHGAP1	ENSG00000175220.12	protein_coding	Y
	0.01	2.09	NYAQVFNKL	9		0.0155	Canonical	BZW2	ENSG00000136261.15	protein_coding	Y
	0.01	2.85	RYLVISEKL	9		0.0245	Canonical	LRRC42	ENSG00000116212.15	protein_coding	Y
	0.01	1.78	TYLPTSPLL	9		0.0117	Canonical	NRDC	ENSG00000078618.21	protein_coding	Y
	0.01	1.43	RYLTGAWRL	9		0.0295	Canonical	ALG5	ENSG00000120697.9	protein_coding	Y
	0.01	1.58	VYFGDPVSL	9		0.0226	Canonical	GNPAT	ENSG00000116906.13	protein_coding	Y
	0.01	1.54	IFTDVALKF	9		0.0292	Canonical	GTF3C4	ENSG00000125484.12	protein_coding	Y
	PF		IYKPVTDFF	9		0.0021	Canonical	LRPPRC	ENSG00000138095.19	protein_coding
	0.01	2.41	TYQRWQFTL	9		0.0147	Canonical	PRPF8	ENSG00000174231.17	protein_coding	Y
	0.01	2.36	EYTRALFLL	9		0.1212	Canonical	MAU2	ENSG00000129933.21	protein_coding	Y
	PF		RYFIAPAKF	9		0.0074	Canonical	LAMC1	ENSG00000135862.6	protein_coding
	PF		EYIRMVAEW	9		0.0735	Canonical	ITCH	ENSG00000078747.15	protein_coding
	0.05	1.65	HYKPTPLYF	9		0.0061	Canonical	SMC4	ENSG00000113810.16	protein_coding	Y
	PF		RYLPQTYVV	9		0.0381	Canonical	ITM2A	ENSG00000078596.11	protein_coding
	PF		KYLINLETL	9		0.0241	Canonical	JAK2	ENSG00000096968.13	protein_coding
	0.01	1.83	SYSMIVNNL	9		0.0447	Canonical	CACYBP	ENSG00000116161.17	protein_coding	Y
	0.05	1.8	RYLPDTLLL	9		0.0089	Canonical	COMT	ENSG00000093010.13	protein_coding	Y
	PF		IYTFPHSAF	9		0.0367	Canonical	BTN2A3P	ENSG00000124549.14	transcribed_unprocessed_pseudogene
	0.01	1.69	YYLNEIQSF	9		0.0012	Canonical	SPATC1L	ENSG00000160284.15	protein_coding	Y
	0.05	1.51	RYPSLWRRL	9		0.0372	Canonical	SMARCB1	ENSG00000099956.19	protein_coding	Y
	0.05	1.91	SYTHIQYLF	9		0.0034	Canonical	SH2D3C	ENSG00000095370.20	protein_coding	Y
	PF	1.61	PYVGGLEEF	9		0.0458	Canonical	TEP1	ENSG00000129566.13	protein_coding
	PF		PFVDHVFTF	9		0.0273	Canonical	BRIX1	ENSG00000113460.12	protein_coding
	0.01	2.05	KYFEVPSVL	9		0.0197	Canonical	ACTR10	ENSG00000131966.14	protein_coding	Y
	PF		KYQNVKHNL	9		0.0277	Canonical	ZMYM1	ENSG00000197056.11	protein_coding
	0.01	1.63	VYNENLVHM	9		0.0215	Canonical	BCAS2	ENSG00000116752.6	protein_coding	Y
	0.01	1.63	VYNENLVHM	9		0.0215	Canonical	BCAS2P2	ENSG00000234332.1	processed_pseudogene	Y
	0.01	1.63	VYNENLVHM	9		0.0215	Canonical	BCAS2P3	ENSG00000226670.1	processed_pseudogene	Y
	0.01	2.23	PYFNAPVYL	9		0.0704	Canonical	GAR1	ENSG00000109534.17	protein_coding	Y
	0.01	2.22	SYLSRLQYF	9		0.0019	Canonical	IQGAP2	ENSG00000145703.16	protein_coding	Y
	PF		SYNRGDSTF	9		0.0583	Canonical	FGA	ENSG00000171560.16	protein_coding
	PF		RYNHITATY	9		0.1659	Canonical	SNRK	ENSG00000163788.14	protein_coding
	0.01	2.42	VYVQNVVKL	9		0.009	Canonical	AP3D1	ENSG00000065000.18	protein_coding	Y
	0.01	2.01	IYHPDIQLL	9		0.0042	Canonical	VPS13C	ENSG00000129003.18	protein_coding	Y
	PF		KYFEKQFEL	9		0.0085	Canonical	TATDN1	ENSG00000147687.19	protein_coding
	0.01	1.93	YYITTRAQF	9		0.0104	Canonical	YES1	ENSG00000176105.14	protein_coding	Y
	0.01	1.93	YYITTRAQF	9		0.0104	Canonical	FYN	ENSG00000010810.17	protein_coding	Y
	PF		RYLNKSFVL	9		0.0387	Canonical	ANKEF1	ENSG00000132623.16	protein_coding
	0.01	1.77	KYKGIFNGF	9		0.0189	Canonical	SLC25A3	ENSG00000075415.12	protein_coding	Y
	PF		RYGDLVDYL	9		0.0793	Canonical	PDGFRB	ENSG00000113721.14	protein_coding
	PF		VYTKVSAYL	9		0.0202	Canonical	TMPRSS4	ENSG00000137648.17	protein_coding
	0.01	1.64	SYMGHFDLL	9	1xOxidation [M3]	0.0249	Canonical	SF3B5	ENSG00000169976.6	protein_coding	Y
	0.01	2.06	IYIGGQEHF	9		0.0032	Canonical	XDH	ENSG00000158125.10	protein_coding	Y
	PF		KYGIVQEFF	9		0.01	Canonical	SOGA1	ENSG00000149639.15	protein_coding
	0.05	1.82	TYVYFTNEL	9		0.1471	Canonical	TNFSF10	ENSG00000121858.11	protein_coding	Y
	PF		IYLPEVRKI	9		0.0088	Canonical	TULP4	ENSG00000130338.13	protein_coding
	0.01	2.5	KYLATLETL	9		0.0184	Canonical	JAK1	ENSG00000162434.12	protein_coding	Y
	PF		EYAKIHDLL	9		0.0707	Canonical	ZNF318	ENSG00000171467.16	protein_coding
	0.05	0.83	PYNDYFEYF	9		0.0164	Canonical	HDAC2	ENSG00000196591.12	protein_coding	Y
	0.05	0.83	PYNDYFEYF	9		0.0164	Canonical	HDAC1	ENSG00000116478.12	protein_coding	Y
	0.05	1.3	TYVTILPEL	9		0.0421	Canonical	XRN1	ENSG00000114127.10	protein_coding	Y
	PF		IGLHVFPTF	9		0.6306	Canonical	TMCO3	ENSG00000150403.18	protein_coding
	0.01	1.51	VYPERTPLL	9		0.0116	Canonical	AL669918.1	ENSG00000250264.1	protein_coding	Y
	0.01	1.51	VYPERTPLL	9		0.0116	Canonical	HLA-DOB	ENSG00000241106.8	protein_coding	Y
	0.01	1.56	VYPSSLSKI	9		0.0335	Canonical	CAND1	ENSG00000111530.13	protein_coding	Y
	0.05	1.74	NFTNVAATF	9		0.1559	Canonical	ACLY	ENSG00000131473.17	protein_coding	Y
	PF		RYISQTQGL	9		0.063	Canonical	HIPK3	ENSG00000110422.12	protein_coding
	PF		RYISQTQGL	9		0.063	Canonical	HIPK1	ENSG00000163349.22	protein_coding
	PF		RYISQTQGL	9		0.063	Canonical	HIPK2	ENSG00000064393.16	protein_coding
	0.05	1.56	TWTEVSYTF	9		0.0128	Canonical	FBXO6	ENSG00000116663.11	protein_coding	Y
	0.01	2.42	VYYPVRHHL	9		0.006	Canonical	TRRAP	ENSG00000196367.13	protein_coding	Y
	0.01	2.11	FYHEAVVLF	9		0.0045	Canonical	TTC31	ENSG00000115282.19	protein_coding	Y
	PF		VYVAGAPRF	9		0.0061	Canonical	ITGA11	ENSG00000137809.17	protein_coding
	0.01	1.65	ILGPPPPSF	9		0.1561	Canonical	MATR3	ENSG00000280987.4	protein_coding	Y
	0.01	1.65	ILGPPPPSF	9		0.1561	Canonical	MATR3	ENSG00000015479.18	protein_coding	Y
	PF		KYALLLQEL	9		0.022	Canonical	PLEKHG4	ENSG00000196155.13	protein_coding
	0.05	1.65	TYLPQTYII	9		0.0098	Canonical	ITM2C	ENSG00000135916.16	protein_coding	Y
	0.05	1.33	TYLDNGVVF	9		0.0092	Canonical	DDB1	ENSG00000167986.13	protein_coding	Y
	0.05	1.85	RYLSKATTL	9		0.0156	Canonical	CDC16	ENSG00000130177.16	protein_coding	Y
	0.05	1.76	PYLFHVVTF	9		0.0114	Canonical	NF1	ENSG00000196712.17	protein_coding	Y
	PF		PYMANVYLI	9		0.0792	Canonical	PLOD2	ENSG00000152952.12	protein_coding
	0.01	1.52	EYQKVWNLF	9		0.0097	Canonical	PARP12	ENSG00000059378.12	protein_coding	Y
	PF		AYGGAFYAF	9		0.0118	Canonical	L3HYPDH	ENSG00000126790.12	protein_coding
	PF		AYGGAFYAF	9		0.0118	Canonical	AL121694.1	ENSG00000258782.3	lncRNA
	0.01	1.75	TYNQKHSLF	9		0.0188	Canonical	MID1IP1	ENSG00000165175.15	protein_coding	Y
	0.05	1.26	NYAAALETF	9		0.0076	Canonical	SUGT1	ENSG00000165416.14	protein_coding	Y
	0.05	1.26	NYAAALETF	9		0.0076	Canonical	SUGT1P1	ENSG00000226823.1	unprocessed_pseudogene	Y
	PF		KYVESFRRF	9		0.0038	Canonical	HNMT	ENSG00000150540.14	protein_coding
	0.01	2.32	NYIKDLNIL	9		0.1213	Canonical	CTDSPL2	ENSG00000137770.14	protein_coding	Y
	0.01	1.36	GYPLWKVTF	9		0.0251	Canonical	PNP	ENSG00000198805.11	protein_coding	Y
	0.01	1.84	QYLPSPPLL	9		0.0094	Canonical	KCNJ5	ENSG00000120457.12	protein_coding	Y
	0.01	2.21	TYDNVHQQF	9		0.005	Canonical	ARHGAP24	ENSG00000138639.18	protein_coding	Y
	0.01	2.39	IYTKLNQKI	9		0.0165	Canonical	EXOC6	ENSG00000138190.16	protein_coding	Y
	PF		QFVPKSHLF	9		0.013	Canonical	WDR3	ENSG00000065183.16	protein_coding
	0.05	1.77	IYNQVNVVL	9		0.0397	Canonical	FAM49B	ENSG00000153310.19	protein_coding	N
	0.05	1.33	VYSQFITQL	9		0.0076	Canonical	RAD50	ENSG00000113522.14	protein_coding	Y
	0.05	1.33	VYSQFITQL	9		0.0076	Canonical	AC116366.3	ENSG00000283782.2	protein_coding	Y
	PF		KYPLLLQSI	9		0.0152	Canonical	ARHGEF1	ENSG00000076928.17	protein_coding
	PF		LYSHLVDYF	9		0.0206	Canonical	GNA11	ENSG00000088256.9	protein_coding
	PF		LYIVEPLKF	9		0.0043	Canonical	SUCO	ENSG00000094975.14	protein_coding
	0.01	2.74	RYVIIPTTF	9		0.003	Canonical	CAPN5	ENSG00000149260.18	protein_coding	Y
	PF		VYSGGVYLF	9		0.0017	Canonical	TMEM161A	ENSG00000064545.14	protein_coding
	0.01	2.11	GYFGNPQKF	9		0.0101	Canonical	LAMA3	ENSG00000053747.16	protein_coding	Y
	0.01	2.23	EYVKQTWNL	9		0.0564	Canonical	SYK	ENSG00000165025.15	protein_coding	Y
	0.01	1.98	VFDPKVFTF	9		0.0044	Canonical	CRYBG1	ENSG00000112297.15	protein_coding	Y
	0.05	1.26	VYQEVQAMF	9		0.0026	Canonical	FAM98B	ENSG00000171262.11	protein_coding	Y
	PF		GYIHVTQTF	9		0.0052	Canonical	NKG7	ENSG00000105374.10	protein_coding
	PF		PYPQYFTQL	9		0.0753	Canonical	HSDL1	ENSG00000103160.12	protein_coding
	PF		NYIKSLSSF	9		0.0063	Canonical	SMG1	ENSG00000157106.16	protein_coding
	PF		KYVDKLEKI	9		0.0162	Canonical	USP5	ENSG00000111667.13	protein_coding
	PF		NYIKSLSSF	9		0.0063	Canonical	SMG1P4	ENSG00000185710.9	transcribed_unprocessed_pseudogene
	PF		NYIKSLSSF	9		0.0063	Canonical	SMG1P1	ENSG00000237296.9	transcribed_unprocessed_pseudogene
	PF		NYIKSLSSF	9		0.0063	Canonical	SMG1P6	ENSG00000254634.4	unprocessed_pseudogene
	PF		NYIKSLSSF	9		0.0063	Canonical	SMG1P3	ENSG00000180747.15	transcribed_unprocessed_pseudogene
	PF		NYIKSLSSF	9		0.0063	Canonical	NPIPB5	ENSG00000243716.10	protein_coding
	PF		NYIKSLSSF	9		0.0063	Canonical	SMG1P5	ENSG00000183604.14	transcribed_unprocessed_pseudogene
	PF		NYIKSLSSF	9		0.0063	Canonical	SMG1P2	ENSG00000205534.6	unprocessed_pseudogene
	PF	1.3	IYNGETLVF	9		0.0103	Canonical	PCYOX1	ENSG00000116005.12	protein_coding
	0.01	2.05	SYRNSLDSF	9		0.0706	Canonical	ZNF326	ENSG00000162664.17	protein_coding	Y
	PF	1.39	AYGLVSATF	9		0.0084	Canonical	AC118553.2	ENSG00000283761.1	protein_coding
	PF	1.39	AYGLVSATF	9		0.0084	Canonical	MFSD14A	ENSG00000156875.14	protein_coding
	PF		KYFAKHPRL	9		0.0419	Canonical	UTRN	ENSG00000152818.18	protein_coding
	0.05	2.13	RYVMTTTTL	9		0.0481	Canonical	EIF2S1	ENSG00000134001.13	protein_coding	Y
	0.01	2.29	AYINRASLL	9		0.129	Canonical	COPS4	ENSG00000138663.9	protein_coding	Y
	0.01	1.65	GYLADPAKF	9		0.0469	Canonical	MRPL15	ENSG00000137547.8	protein_coding	Y
	0.01	2.32	QYAVLLNRF	9		0.014	Canonical	NSUN3	ENSG00000178694.10	protein_coding	Y
	0.01	2.16	RFVNVVPTF	9		0.0169	Canonical	FAUP1	ENSG00000235297.3	processed_pseudogene	Y
	0.01	2.16	RFVNVVPTF	9		0.0169	Canonical	FAU	ENSG00000149806.11	protein_coding	Y
	0.05	1.73	PFAPAIQTF	9		0.0138	Canonical	UBA7	ENSG00000182179.13	protein_coding	Y
	0.01	2.22	MYLKTVDKF	9		0.0047	Canonical	TRAPPC2	ENSG00000196459.14	protein_coding	Y
	0.01	2.22	MYLKTVDKF	9		0.0047	Canonical	TRAPPC2B	ENSG00000256060.2	protein_coding	Y
	PF		RLPSETYFF	9		0.0718	Canonical	ZBED6	ENSG00000257315.2	protein_coding
	PF		RLPSETYFF	9		0.0718	Canonical	ZC3H11A	ENSG00000058673.16	protein_coding
	0.01	1.44	NYAQVLDKF	9		0.0106	Canonical	ASAP1	ENSG00000153317.15	protein_coding	Y
	PF		YWEVQPATF	9		0.1056	Canonical	BGN	ENSG00000182492.16	protein_coding
	PF		RLPEEWSQW	9		0.2417	Canonical	HSPB1	ENSG00000106211.9	protein_coding
	0.01	2.18	NYIGLINRI	9		0.0643	Canonical	EIF2AK2	ENSG00000055332.18	protein_coding	Y
	0.01	2.23	VYFSAIQKI	9		0.0053	Canonical	BAIAP2L2	ENSG00000128298.17	protein_coding	Y
	0.01	1.63	VYKTIMEQF	9	1xOxidation [M6]	0.0044	Canonical	BAIAP2	ENSG00000175866.15	protein_coding	Y
	0.01	1.63	RLPEPLPSW	9		0.1216	Canonical	LRIG3	ENSG00000139263.11	protein_coding	Y
	PF		TYNYPVHYF	9		0.0036	Canonical	TMEM30A	ENSG00000112697.16	protein_coding
	0.05	1.28	TYPDVNNSI	9		0.0693	Canonical	VPS26A	ENSG00000122958.15	protein_coding	Y
	0.05	1.52	TYARLAQLL	9		0.0225	Canonical	USP19	ENSG00000172046.19	protein_coding	Y
	PF		TYVTEVREL	9		0.101	Canonical	KTN1	ENSG00000126777.18	protein_coding
	PF		VFIRGGEEF	9		0.0509	Canonical	AC124319.1	ENSG00000173821.19	protein_coding
	0.01	1.96	YYLTDIDRI	9		0.1248	Canonical	GNA14	ENSG00000156049.7	protein_coding	Y
	0.01	2.24	YYTPITPHL	9		0.0056	Canonical	PTBP3	ENSG00000119314.15	protein_coding	Y
	0.05	1.41	VYIHRTDRL	9		0.0419	Canonical	AHI1	ENSG00000135541.21	protein_coding	Y
	0.05	1.13	TYPAELNNI	9		0.087	Canonical	AHR	ENSG00000106546.14	protein_coding	Y
	PF		RYAEQISVL	9		0.0439	Canonical	CCDC121	ENSG00000176714.9	protein_coding
	0.05	2	RYGLVTNEI	9		0.088	Canonical	IFIH1	ENSG00000115267.8	protein_coding	Y
	PF		RYGSPINTF	9		0.0015	Canonical	C6orf132	ENSG00000188112.9	protein_coding
	PF		RYQKLIVQI	9		0.0148	Canonical	AC004593.3	ENSG00000285162.1	protein_coding
	PF		RYQKLIVQI	9		0.0148	Canonical	CHN2	ENSG00000106069.22	protein_coding
	0.05	1.69	VYTSVVEEL	9		0.0156	Canonical	MAN2B2	ENSG00000013288.8	protein_coding	Y
	PF		KYGNFIDKL	9		0.0629	Canonical	GTPBP10	ENSG00000105793.15	protein_coding
	PF		KYLTQHERI	9		0.0572	Canonical	ZNF473	ENSG00000142528.16	protein_coding
	0.01	1.98	KYGVYEAIF	9		0.0827	Canonical	PPARA	ENSG00000186951.16	protein_coding	Y
	0.01	1	KQPEDYFYL	9		0.3506	Canonical	MYO9B	ENSG00000099331.13	protein_coding	Y
	0.01	2.49	AYDTVRWEF	9		0.0198	Canonical	DPP7	ENSG00000176978.14	protein_coding	Y
	0.01	2.09	AYGKDFHLI	9		0.0193	Canonical	MIER1	ENSG00000198160.14	protein_coding	Y
	PF		KYHQVDVRF	9		0.0091	Canonical	PPP1R36	ENSG00000165807.8	protein_coding
	PF		LYDIVFKHF	9		0.0163	Canonical	SP100	ENSG00000067066.17	protein_coding
	PF		KYLADLPTL	9		0.0259	Canonical	CEP85L	ENSG00000111860.14	protein_coding
	PF		LYFESVRTF	9		0.0046	Canonical	TMBIM4	ENSG00000155957.17	protein_coding
	PF		LYFESVRTF	9		0.0046	Canonical	AC078927.1	ENSG00000228144.2	protein_coding
	0.01	2.07	KYVENFGLI	9		0.1176	Canonical	SPCS2	ENSG00000118363.12	protein_coding	Y
	0.01	2.07	KYVENFGLI	9		0.1176	Canonical	SPCS2P4	ENSG00000228589.3	processed_pseudogene	Y
	0.05	1.25	KYMSVIAEL	9		0.0096	Canonical	ATPAF1	ENSG00000123472.12	protein_coding	Y
	PF		IYSQTYFRF	9		0.0017	Canonical	TNFSF10	ENSG00000121858.11	protein_coding
	0.01	2.25	LYLKEVTKF	9		0.0028	Canonical	RRAGD	ENSG00000025039.14	protein_coding	Y
	0.01	2.25	LYLKEVTKF	9		0.0028	Canonical	RRAGC	ENSG00000116954.8	protein_coding	Y
	0.01	2.25	LYLKEVTKF	9		0.0028	Canonical	AL139260.2	ENSG00000273637.1	lncRNA	Y
	PF		RYTPFSNGL	9		0.1386	Canonical	WDR59	ENSG00000103091.15	protein_coding
	0.05	1.09	IYKGIPLQL	9		0.0108	Canonical	USP6NL	ENSG00000148429.14	protein_coding	Y
	PF		KYSPFVVSF	9		0.001	Canonical	ITPKC	ENSG00000086544.3	protein_coding
	PF		IYQWVRDEL	9		0.1162	Canonical	SATB1	ENSG00000182568.17	protein_coding
	0.01	2.26	KYWDVPPPGF	10		0.0667	Canonical	U2AF2	ENSG00000063244.12	protein_coding	Y
	0.01	3.48	KYADLSHNRL	10		0.1141	Canonical	RARS	ENSG00000113643.9	protein_coding	Y
	PF		AYSYVPPHW	9		0.0163	Canonical	FAM168A	ENSG00000054965.10	protein_coding
	PF		RYPNSHTHYF	10		0.0082	Canonical	CNOT1	ENSG00000125107.18	protein_coding
	0.01	1.86	VYNENLVHMI	10		0.1866	Canonical	BCAS2	ENSG00000116752.6	protein_coding	Y
	0.01	1.86	VYNENLVHMI	10		0.1866	Canonical	BCAS2P2	ENSG00000234332.1	processed_pseudogene	Y
	PF		EYIRALQRL	9		0.047	Canonical	ASCL2	ENSG00000183734.4	protein_coding
	0.01	1.86	VYNENLVHMI	10		0.1866	Canonical	BCAS2P3	ENSG00000226670.1	processed_pseudogene	Y
	PF		RYAVVLNATW	10		0.1685	Canonical	SCD	ENSG00000099194.6	protein_coding
	PF		RYAVVLNATW	10		0.1685	Canonical	SCDP1	ENSG00000226549.3	processed_pseudogene
	0.01	2.03	KYLSVQGQLF	10		0.0111	Canonical	MTCH1	ENSG00000137409.19	protein_coding	Y
	0.01	2.03	KYLSVQGQLF	10		0.0111	Canonical	AC112694.1	ENSG00000256282.1	transcribed_processed_pseudogene	Y
	PF		IYFKKPLNI	9		0.0076	Canonical	ATP6V0A1	ENSG00000033627.16	protein_coding
	0.01	2.2	EYPDRIMNTF	10		0.0342	Canonical	AC092143.1	ENSG00000198211.8	protein_coding	Y
	0.01	2.2	EYPDRIMNTF	10		0.0342	Canonical	TUBB3	ENSG00000258947.7	protein_coding	Y
	0.01	2.2	EYPDRIMNTF	10		0.0342	Canonical	TUBB2B	ENSG00000137285.10	protein_coding	Y
	0.01	2.2	EYPDRIMNTF	10		0.0342	Canonical	TUBB2A	ENSG00000137267.6	protein_coding	Y
	0.05	1.85	LYSRVQATF	9		0.006	Canonical	FBXO31	ENSG00000103264.18	protein_coding	Y
	0.01	2.2	EYPDRIMNTF	10		0.0342	Canonical	TUBB4B	ENSG00000188229.6	protein_coding	Y
	0.01	2.2	EYPDRIMNTF	10		0.0342	Canonical	TUBB	ENSG00000196230.13	protein_coding	Y
	0.01	2.2	EYPDRIMNTF	10		0.0342	Canonical	TUBBP1	ENSG00000127589.4	transcribed_processed_pseudogene	Y
	0.01	2.21	VYAHIYHQHF	10		0.0094	Canonical	MOB1A	ENSG00000114978.18	protein_coding	Y
	0.01	2.21	VYAHIYHQHF	10		0.0094	Canonical	MOB1B	ENSG00000173542.8	protein_coding	Y
	0.01	2.97	RYFDPANGKF	10		0.0204	Canonical	EEF2	ENSG00000167658.16	protein_coding	Y
	0.01	1.99	RYMPPAHRNF	10		0.0038	Canonical	IDO1	ENSG00000131203.13	protein_coding	Y
	PF		RYPPDIRATF	10		0.007	Canonical	SBF1	ENSG00000100241.21	protein_coding
	0.01	2.17	FYLEGGFSKF	10		0.017	Canonical	DUSP6	ENSG00000139318.8	protein_coding	Y
	PF		VWSDVTPLRF	10		0.0439	Canonical	MMP2	ENSG00000087245.13	protein_coding
	0.05	1.95	RFIRPMGLRF	10		0.1263	Canonical	NSA2	ENSG00000164346.10	protein_coding	Y
	0.05	1.95	RFIRPMGLRF	10		0.1263	Canonical	AC092868.3	ENSG00000259750.1	processed_pseudogene	Y
	0.05	1.95	RFIRPMGLRF	10		0.1263	Canonical	AC092641.1	ENSG00000227176.1	processed_pseudogene	Y
	0.01	2.48	KYLDVKFEYL	10		0.0842	Canonical	PICK1	ENSG00000100151.16	protein_coding	Y
	0.01	1.29	VWSDVTPLTF	10		0.0172	Canonical	MMP11	ENSG00000099953.10	protein_coding	Y
	0.01	3.02	KYITDWQNVF	10		0.0188	Canonical	AC021087.5	ENSG00000286001.1	protein_coding	Y
	0.01	3.02	KYITDWQNVF	10		0.0188	Canonical	PDCD6	ENSG00000249915.8	protein_coding	Y
	0.01	1.84	RFLDDLGLKF	10		0.1174	Canonical	DSG2	ENSG00000046604.13	protein_coding	Y
	0.01	2.95	LYADVGGKQF	10		0.1052	Canonical	SSR4	ENSG00000180879.13	protein_coding	Y
	0.01	1.98	IYISTLKTEF	10		0.0186	Canonical	AHSA1	ENSG00000100591.8	protein_coding	Y
	0.01	2.07	IYPELQIERF	10		0.0064	Canonical	APBB1IP	ENSG00000077420.16	protein_coding	Y
	0.01	1.66	TYPQLEGFKF	10		0.0192	Canonical	WDFY4	ENSG00000128815.19	protein_coding	Y
	0.01	0.99	IFIDPGYQTF	10		0.0116	Canonical	ZMYM2	ENSG00000121741.16	protein_coding	Y
	0.01	3.27	IYHKLKHFKF	10		0.1053	Canonical	CCDC82	ENSG00000149231.14	protein_coding	Y
	0.01	2.36	TYMGHTGAVW	10		0.1912	Canonical	EIF3I	ENSG00000084623.11	protein_coding	Y
	PF		RYAILTKATW	10		0.1806	Canonical	MYO1E	ENSG00000157483.8	protein_coding
	0.01	1.52	KFIDPIYQVW	10		0.1147	Canonical	RRN3	ENSG00000085721.12	protein_coding	Y
	0.01	1.52	KFIDPIYQVW	10		0.1147	Canonical	RRN3P2	ENSG00000103472.10	lncRNA	Y
	0.01	1.52	KFIDPIYQVW	10		0.1147	Canonical	AC009093.9	ENSG00000284671.1	transcribed_unprocessed_pseudogene	Y
	PF		VWNPRSHEKL	10		0.4646	Canonical	WDR6	ENSG00000178252.18	protein_coding
	0.01	2.07	RYLPTGSFPF	10		0.0212	Canonical	TUSC3	ENSG00000104723.20	protein_coding	Y
	0.01	1.82	TQPGTGWVQF	10		0.5996	Canonical	NECAP2	ENSG00000157191.20	protein_coding	Y
	0.05	1.52	YYITGNLETF	10		0.0099	Canonical	SEL1L3	ENSG00000091490.11	protein_coding	Y
	0.01	2.17	AWAPKPYHKF	10		0.0298	Canonical	TNIK	ENSG00000154310.17	protein_coding	Y
	0.01	2.17	AWAPKPYHKF	10		0.0298	Canonical	MINK1	ENSG00000141503.17	protein_coding	Y
	0.01	2.17	AWAPKPYHKF	10		0.0298	Canonical	MAP4K4	ENSG00000071054.16	protein_coding	Y
	0.01	2.54	KWNPTAGVAF	10		0.1716	Canonical	POLR2C	ENSG00000102978.13	protein_coding	Y
	0.01	1.98	VYQKIHNEKF	10		0.0173	Canonical	ZNF529	ENSG00000186020.13	protein_coding	Y
	0.01	2.11	KYITQGQLLQF	11		0.0207	Canonical	ELOVL5	ENSG00000012660.14	protein_coding	Y
	0.01	3.08	KYMEVHEKASF	11		0.0179	Canonical	PTPN23	ENSG00000076201.15	protein_coding	Y
	0.01	3.22	IYDTSTDRLLW	11		0.2183	Canonical	ISG20	ENSG00000172183.15	protein_coding	Y
	0.01	2.11	VYVDLGGSHVF	11		0.0159	Canonical	BMS1	ENSG00000165733.8	protein_coding	Y
	PF		FYLPKDAVKHL	11		0.2776	Canonical	RASSF1	ENSG00000068028.17	protein_coding
	0.01	2.64	KYIENLDNITF	11		0.0115	Canonical	ZFYVE16	ENSG00000039319.17	protein_coding	Y
	0.01	2.34	HYNSDLNNLLF	11		0.1021	Canonical	RHOBTB3	ENSG00000164292.13	protein_coding	Y
	PF		TVQPGQNFHMF	11		1.085	Canonical	PSMA5	ENSG00000143106.13	protein_coding
	0.05	1.45	RWFTHASPTL	10		0.4731	Canonical	RRM1	ENSG00000167325.15	protein_coding	Y
	PF		KYPGHLAAITL	11		0.1374	Canonical	ACTR5	ENSG00000101442.10	protein_coding
	0.01	1.15	RFLNDPGHLLW	11		0.1682	Canonical	TRIM39-RPP21	ENSG00000248167.7	protein_coding	Y
	0.01	1.15	RFLNDPGHLLW	11		0.1682	Canonical	RPP21	ENSG00000241370.5	protein_coding	Y
	0.01	1.68	EYMLEKSFYQF	11		0.1307	Canonical	MTREX	ENSG00000039123.16	protein_coding	Y
	0.01	1.53	VYNANINLF	9		0.0019	Canonical	PKD2	ENSG00000118762.8	protein_coding	Y
	0.01	1.53	VYNANINLF	9		0.0019	Canonical	PKD2L1	ENSG00000107593.17	protein_coding	Y
	PF		RYPDTIALTF	10		0.0035	Canonical	MAPKBP1	ENSG00000137802.14	protein_coding
	0.01	2.94	SGPYGGGGQYF	11		0.1553	Canonical	HNRNPA1	ENSG00000135486.17	protein_coding	Y
	0.01	2.94	SGPYGGGGQYF	11		0.1553	Canonical	HNRNPA1L2	ENSG00000139675.12	protein_coding	Y
	PF		TWFNQPARKI	10		1.3634	Canonical	RPL13	ENSG00000167526.13	protein_coding
	PF		TWFNQPARKI	10		1.3634	Canonical	RPL13P12	ENSG00000215030.5	processed_pseudogene
	0.01	2.94	SGPYGGGGQYF	11		0.1553	Canonical	HNRNPA1P7	ENSG00000215492.6	processed_pseudogene	Y
	0.01	2.94	SGPYGGGGQYF	11		0.1553	Canonical	HNRNPA1P10	ENSG00000214223.4	processed_pseudogene	Y
	0.01	2.94	SGPYGGGGQYF	11		0.1553	Canonical	HNRNPA1P35	ENSG00000225695.1	processed_pseudogene	Y
	PF		TYNKHINISF	10		0.0497	Canonical	THAP2	ENSG00000173451.7	protein_coding
	0.01	2.94	SGPYGGGGQYF	11		0.1553	Canonical	HNRNPA1P12	ENSG00000220157.4	processed_pseudogene	Y
	0.01	2.58	TYSPALNKMF	10	1xOxidation [M9]	0.0184	Canonical	TP53	ENSG00000141510.17	protein_coding	Y
	0.01	2.94	SGPYGGGGQYF	11		0.1553	Canonical	HNRNPA1P43	ENSG00000214204.4	processed_pseudogene	Y
	0.01	2.94	SGPYGGGGQYF	11		0.1553	Canonical	HNRNPA1P63	ENSG00000227453.1	processed_pseudogene	Y
	0.01	2.94	SGPYGGGGQYF	11		0.1553	Canonical	HNRNPA1P44	ENSG00000249271.2	processed_pseudogene	Y
	0.01	2.94	SGPYGGGGQYF	11		0.1553	Canonical	HNRNPA1P21	ENSG00000228168.1	processed_pseudogene	Y
	0.01	2.94	SGPYGGGGQYF	11		0.1553	Canonical	HNRNPA1P5	ENSG00000259512.3	processed_pseudogene	Y
	0.01	2.94	SGPYGGGGQYF	11		0.1553	Canonical	HNRNPA1P58	ENSG00000219582.3	processed_pseudogene	Y
	0.01	2.94	SGPYGGGGQYF	11		0.1553	Canonical	HNRNPA1P22	ENSG00000236459.1	processed_pseudogene	Y
	0.01	2.94	SGPYGGGGQYF	11		0.1553	Canonical	HNRNPA1P40	ENSG00000212961.4	processed_pseudogene	Y
	0.01	2.94	SGPYGGGGQYF	11		0.1553	Canonical	HNRNPA1P6	ENSG00000229887.4	transcribed_unprocessed_pseudogene	Y
	0.01	2.94	SGPYGGGGQYF	11		0.1553	Canonical	HNRNPA1P57	ENSG00000237442.3	transcribed_processed_pseudogene	Y
	0.05	1	MYPPAFRF	8		0.044	Canonical	TBXAS1	ENSG00000059377.17	protein_coding	Y
	PF		KYGPVFTI	8		0.162	Canonical	CYP2S1	ENSG00000167600.14	protein_coding
	0.05	1.31	YLANFYIF	8		0.8081	Canonical	C16orf89	ENSG00000153446.15	protein_coding	Y
	0.05	1.31	YLANFYIF	8		0.8081	Canonical	ABCC6	ENSG00000091262.15	protein_coding	Y
	PF	1.59	YGGGGQYF	8		1.2905	Canonical	HNRNPA1	ENSG00000135486.17	protein_coding
	PF	1.59	YGGGGQYF	8		1.2905	Canonical	HNRNPA1L2	ENSG00000139675.12	protein_coding
	PF	1.59	YGGGGQYF	8		1.2905	Canonical	HNRNPA1P7	ENSG00000215492.6	processed_pseudogene
	PF	1.59	YGGGGQYF	8		1.2905	Canonical	HNRNPA1P10	ENSG00000214223.4	processed_pseudogene
	PF	1.59	YGGGGQYF	8		1.2905	Canonical	HNRNPA1P60	ENSG00000233497.4	processed_pseudogene
	PF	1.59	YGGGGQYF	8		1.2905	Canonical	HNRNPA1P35	ENSG00000225695.1	processed_pseudogene
	PF	1.59	YGGGGQYF	8		1.2905	Canonical	HNRNPA1P70	ENSG00000236946.2	processed_pseudogene
	PF	1.59	YGGGGQYF	8		1.2905	Canonical	HNRNPA1P12	ENSG00000220157.4	processed_pseudogene
	PF	1.59	YGGGGQYF	8		1.2905	Canonical	HNRNPA1P43	ENSG00000214204.4	processed_pseudogene
	PF	1.59	YGGGGQYF	8		1.2905	Canonical	HNRNPA1P3	ENSG00000226188.2	processed_pseudogene
	PF	1.59	YGGGGQYF	8		1.2905	Canonical	HNRNPA1P63	ENSG00000227453.1	processed_pseudogene
	PF	1.59	YGGGGQYF	8		1.2905	Canonical	HNRNPA1P44	ENSG00000249271.2	processed_pseudogene
	PF	1.59	YGGGGQYF	8		1.2905	Canonical	HNRNPA1P21	ENSG00000228168.1	processed_pseudogene
	PF	1.59	YGGGGQYF	8		1.2905	Canonical	HNRNPA1P2	ENSG00000237285.1	processed_pseudogene
	PF	1.59	YGGGGQYF	8		1.2905	Canonical	HNRNPA1P5	ENSG00000259512.3	processed_pseudogene
	PF	1.59	YGGGGQYF	8		1.2905	Canonical	HNRNPA1P58	ENSG00000219582.3	processed_pseudogene
	PF	1.59	YGGGGQYF	8		1.2905	Canonical	HNRNPA1P38	ENSG00000253605.1	processed_pseudogene
	PF	1.59	YGGGGQYF	8		1.2905	Canonical	HNRNPA1P22	ENSG00000236459.1	processed_pseudogene
	PF	1.59	YGGGGQYF	8		1.2905	Canonical	HNRNPA1P40	ENSG00000212961.4	processed_pseudogene
	PF	1.59	YGGGGQYF	8		1.2905	Canonical	HNRNPA1P53	ENSG00000229534.1	processed_pseudogene
	PF	1.59	YGGGGQYF	8		1.2905	Canonical	HNRNPA1P6	ENSG00000229887.4	transcribed_unprocessed_pseudogene
	PF	1.59	YGGGGQYF	8		1.2905	Canonical	HNRNPA1P24	ENSG00000241947.1	processed_pseudogene
	PF	1.59	YGGGGQYF	8		1.2905	Canonical	HNRNPA1P57	ENSG00000237442.3	transcribed_processed_pseudogene
	PF	1.59	YGGGGQYF	8		1.2905	Canonical	HNRNPA1P50	ENSG00000257195.1	processed_pseudogene
	0.01	2.62	YYEKLHTYF	9		0.013	Canonical	ITGB4	ENSG00000132470.14	protein_coding	Y
	PF		VYAIKNHYW	9		0.0149	Canonical	TM9SF3	ENSG00000077147.16	protein_coding
	0.05	1.76	RYMPQNPHI	9		0.0123	Canonical	RBBP7	ENSG00000102054.17	protein_coding	Y
	0.01	2.21	NYKSHHLQL	9		0.1273	Canonical	CWF19L1	ENSG00000095485.18	protein_coding	Y
	0.01	1.99	SYIEHIFEI	9		0.0067	Canonical	PEA15	ENSG00000162734.12	protein_coding	Y
	PF		RYLDELMKL	9		0.0155	Canonical	IQGAP1	ENSG00000140575.13	protein_coding
	0.05	0.83	VYDPLFSQL	9		0.0156	Canonical	SRRD	ENSG00000100104.13	protein_coding	Y
	0.01	1.82	EYVKFLHKF	9		0.0042	Canonical	ZNF506	ENSG00000081665.14	protein_coding	Y
	0.05	1.83	KYSSGFRNI	9		0.0549	Canonical	ATM	ENSG00000149311.18	protein_coding	Y
	0.01	2.15	DYVEGLRVF	9		0.1219	Canonical	MYL6	ENSG00000092841.18	protein_coding	Y
	PF		RYAEWEERI	9		0.1199	Canonical	GBA2	ENSG00000070610.14	protein_coding
	0.01	2.15	KYVKVLHKF	9		0.0011	Canonical	AC092161.1	ENSG00000198039.11	protein_coding	Y
	0.01	2.15	KYVKVLHKF	9		0.0011	Canonical	AC008554.1	ENSG00000237440.9	protein_coding	Y
	0.01	2.34	QYVTQINRL	9		0.0782	Canonical	PREX1	ENSG00000124126.14	protein_coding	Y
	0.01	1.57	RFEEAHFTF	9		0.0208	Canonical	PIAS3	ENSG00000131788.16	protein_coding	Y
	PF		KYVKVMHKF	9		0.0018	Canonical	ZNF138	ENSG00000197008.9	protein_coding
	0.01	1.83	YYLTHGLYL	9		0.0504	Canonical	PIGU	ENSG00000101464.10	protein_coding	Y
	0.01	1.62	VYTTTVHWL	9		0.0451	Canonical	PRPF8	ENSG00000174231.17	protein_coding	Y
	PF		IYAKHLEHW	9		0.012	Canonical	HS3ST3A1	ENSG00000153976.3	protein_coding
	PF		IYAKHLEHW	9		0.012	Canonical	HS3ST3B1	ENSG00000125430.9	protein_coding
	0.01	2.11	KYGKSFRKL	9		0.0535	Canonical	STK39	ENSG00000198648.11	protein_coding	Y
	0.01	1.35	LYPPRQPTF	9		0.002	Canonical	SIGLEC1	ENSG00000088827.12	protein_coding	Y
	PF		FYNNVKSRF	9		0.0242	Canonical	MYRIP	ENSG00000170011.14	protein_coding
	PF		LYQEIIHYF	9		0.0013	Canonical	DOCK1	ENSG00000150760.12	protein_coding
	PF		VYPYKLYRL	9		0.0236	Canonical	ZBTB38	ENSG00000177311.11	protein_coding
	PF		HYIRKYNRF	9		0.012	Canonical	RPS11	ENSG00000142534.7	protein_coding
	0.05	1.13	VYDDLKYVW	9		0.0205	Canonical	RENBP	ENSG00000102032.13	protein_coding	Y
	PF		KYIIELNHM	9		0.058	Canonical	YPEL3	ENSG00000090238.11	protein_coding
	0.01	1.54	QYPVIIHLI	9		0.0051	Canonical	ELOVL1	ENSG00000066322.15	protein_coding	Y
	0.01	1.94	AYPHNLMTF	9		0.0043	Canonical	TRAM1	ENSG00000067167.8	protein_coding	Y
	0.05	1.51	QYSPLLAAF	9		0.0099	Canonical	BZW1	ENSG00000082153.18	protein_coding	Y
	0.05	1.51	QYSPLLAAF	9		0.0099	Canonical	BZW1P2	ENSG00000198406.7	processed_pseudogene	Y
	PF		RYDNVTILF	9		0.0094	Canonical	GUCY1B1	ENSG00000061918.13	protein_coding
	PF		RYLQKIEEF	9		0.002	Canonical	KCNG1	ENSG00000026559.14	protein_coding
	0.01	2.61	HYNSHYEKF	9		0.0059	Canonical	ASTN2	ENSG00000148219.16	protein_coding	Y
	0.05	1.31	VFTEVANLF	9		0.029	Canonical	SIN3B	ENSG00000127511.9	protein_coding	Y
	0.05	1.09	QYLLDTSTW	9		0.0508	Canonical	TM4SF1	ENSG00000169908.12	protein_coding	Y
	PF		PYYSKFILI	9		0.0733	Canonical	ORC5	ENSG00000164815.11	protein_coding
	0.01	2.3	NYKKFYEQF	9		0.0082	Canonical	HSP90AA1	ENSG00000080824.18	protein_coding	Y
	0.01	2.3	NYKKFYEQF	9		0.0082	Canonical	HSP90AA6P	ENSG00000181359.5	transcribed_processed_pseudogene	Y
	0.05	1.54	PYISNIYLI	9		0.0412	Canonical	PLOD1	ENSG00000083444.17	protein_coding	Y
	0.01	2.21	HYSPIYLSF	9		0.0011	Canonical	FDFT1	ENSG00000079459.13	protein_coding	Y
	PF		RYGSDFYSM	9		0.0772	Canonical	AMZ2	ENSG00000196704.12	protein_coding
	PF		RYPKEFQKL	9		0.0071	Canonical	IDS	ENSG00000010404.18	protein_coding
	PF		RYPKEFQKL	9		0.0071	Canonical	AC244197.3	ENSG00000241489.8	protein_coding
	0.01	1.91	NYLHLDYNF	9		0.0272	Canonical	PRPF8	ENSG00000174231.17	protein_coding	Y
	PF		MYPDVFAHF	9		0.0011	Canonical	PC	ENSG00000173599.14	protein_coding
	0.05	1.7	TYLTSIPSI	9		0.0286	Canonical	MCF2L	ENSG00000126217.21	protein_coding	Y
	0.05	1.41	WYMDNPQNL	9		0.0584	Canonical	PLEKHA2	ENSG00000169499.15	protein_coding	Y
	0.05	1.41	WYMDNPQNL	9		0.0584	Canonical	PLEKHA1	ENSG00000107679.14	protein_coding	Y
	0.01	1.83	KYGMVTYLL	9		0.0298	Canonical	GPAT4	ENSG00000158669.11	protein_coding	Y
	0.05	1.68	NYISGIQTI	9		0.0107	Canonical	SF3B3	ENSG00000189091.13	protein_coding	Y
	PF		VYLDGIVRI	9		0.0094	Canonical	KIAA0895L	ENSG00000196123.13	protein_coding
	0.05	1.39	SYGKINILL	9		0.038	Canonical	ASCC3	ENSG00000112249.14	protein_coding	Y
	PF		IYHQVAVQF	9		0.0026	Canonical	ACACB	ENSG00000076555.15	protein_coding
	PF		IYHQVAVQF	9		0.0026	Canonical	ACACA	ENSG00000278540.5	protein_coding
	PF		RYLQDLLAW	9		0.079	Canonical	PLEC	ENSG00000178209.15	protein_coding
	0.05	1.62	IYGYVAEQF	9		0.0049	Canonical	SPCS1	ENSG00000114902.14	protein_coding	N
	0.01	1.86	IYQKVRHRL	9		0.0165	Canonical	STRIP1	ENSG00000143093.15	protein_coding	Y
	0.01	1.44	VFPDKGYSF	9		0.0112	Canonical	TIA1	ENSG00000116001.16	protein_coding	Y
	PF		QYAPSTAQF	9		0.004	Canonical	ZMIZ2	ENSG00000122515.15	protein_coding
	0.01	2.17	SFSTVHEKF	9		0.025	Canonical	WDR36	ENSG00000134987.11	protein_coding	Y
	0.05	1.78	RYSDSTFTF	9		0.0017	Canonical	PARP8	ENSG00000151883.18	protein_coding	Y
	0.05	1.78	RYSDSTFTF	9		0.0017	Canonical	AC245297.3	ENSG00000274265.5	lncRNA	Y
	0.05	1.78	RYSDSTFTF	9		0.0017	Canonical	LINC01145	ENSG00000272419.6	transcribed_unprocessed_pseudogene	Y
	0.05	1.78	RYSDSTFTF	9		0.0017	Canonical	AC244669.1	ENSG00000223804.5	transcribed_unprocessed_pseudogene	Y
	0.05	1.78	RYSDSTFTF	9		0.0017	Canonical	AC242842.2	ENSG00000284964.1	transcribed_unprocessed_pseudogene	Y
	PF	1.22	AYTTVLQEW	9		0.0294	Canonical	KANK2	ENSG00000197256.10	protein_coding
	0.01	2.51	KYVKGLISI	9		0.0489	Canonical	WDR35	ENSG00000118965.14	protein_coding	Y
	0.01	1.75	PYIIHTVLY	9		0.4419	Canonical	UBR4	ENSG00000127481.15	protein_coding	Y
	0.05	1.87	QYSNAFDVF	9		0.0347	Canonical	TOB1	ENSG00000141232.5	protein_coding	Y
	PF	1.52	AYAENIALL	9		0.0408	Canonical	PIK3R4	ENSG00000196455.8	protein_coding
	0.01	1.31	NYPQSVPRL	9		0.0343	Canonical	MYO1C	ENSG00000197879.17	protein_coding	Y
	PF		VYTTTRSHL	9		0.1958	Canonical	CLPTM1L	ENSG00000049656.14	protein_coding
	0.05	1.33	SYVVAMETF	9		0.012	Canonical	DDB1	ENSG00000167986.13	protein_coding	Y
	PF		RYAALRELI	9		0.118	Canonical	CCDC97	ENSG00000142039.4	protein_coding
	0.01	1.48	VYIIGSSGF	9		0.0363	Canonical	SCCPDH	ENSG00000143653.10	protein_coding	Y
	0.01	2.13	KYITQGQLL	9		0.0186	Canonical	ELOVL5	ENSG00000012660.14	protein_coding	Y
	0.01	2.46	KYSEVFEAI	9		0.0194	Canonical	CSNK2A1	ENSG00000101266.19	protein_coding	Y
	0.01	2.46	KYSEVFEAI	9		0.0194	Canonical	CSNK2A3	ENSG00000254598.2	protein_coding	Y
	0.01	2.46	KYSEVFEAI	9		0.0194	Canonical	CSNK2A2	ENSG00000070770.9	protein_coding	Y
	0.05	1.56	HYTIVFNTF	9		0.0055	Canonical	ATP2B1	ENSG00000070961.15	protein_coding	Y
	0.05	1.56	HYTIVFNTF	9		0.0055	Canonical	ATP2B4	ENSG00000058668.14	protein_coding	Y
	0.05	1.34	VYSIISVQL	9		0.0142	Canonical	TMBIM1	ENSG00000135926.15	protein_coding	Y
	0.05	1.43	QYAIISEAW	9		0.0767	Canonical	CRYL1	ENSG00000165475.15	protein_coding	N
	PF		KYLTVNKRL	9		0.1386	Canonical	ITPR1	ENSG00000150995.19	protein_coding
	0.01	1.69	NYLTKIYGL	9		0.1189	Canonical	PODN	ENSG00000174348.13	protein_coding	Y
	PF		KYLTVNKRL	9		0.1386	Canonical	ITPR2	ENSG00000123104.12	protein_coding
	PF		KYLTVNKRL	9		0.1386	Canonical	ITPR3	ENSG00000096433.11	protein_coding
	0.05	1.12	DYAVVLNQL	9		0.165	Canonical	CUL7	ENSG00000044090.8	protein_coding	Y
	PF		YYTSVTPVL	9		0.0429	Canonical	PTBP1	ENSG00000011304.20	protein_coding
	PF		YYTSVTPVL	9		0.0429	Canonical	PTBP1P	ENSG00000259078.2	processed_pseudogene
	0.01	2.26	RYAEAVQLL	9		0.0055	Canonical	TTC30A	ENSG00000197557.7	protein_coding	Y
	0.01	2.26	RYAEAVQLL	9		0.0055	Canonical	TTC30B	ENSG00000196659.9	protein_coding	Y
	0.05	1.35	QYLMDNPTF	9		0.0174	Canonical	PRPF40A	ENSG00000196504.16	protein_coding	Y
	0.05	2.16	VQTAVINVF	9		0.7884	Canonical	PRR5L	ENSG00000135362.14	protein_coding	Y
	0.05	1.54	VFAGVFNTF	9		0.008	Canonical	F13A1	ENSG00000124491.15	protein_coding	Y
	PF	0.9	EYNEVANLF	9		0.0184	Canonical	PARP11	ENSG00000111224.14	protein_coding
	0.05	1.61	VYKVVGNLL	9		0.0544	Canonical	IQGAP3	ENSG00000183856.11	protein_coding	Y
	0.01	1.98	TYQDIQNTI	9		0.0148	Canonical	POLR2A	ENSG00000181222.16	protein_coding	Y
	0.05	1.48	SYSQSSNLF	9		0.0086	Canonical	ZNF24	ENSG00000172466.16	protein_coding	Y
	PF	1.19	VYGDFQEAF	9		0.0117	Canonical	TENT5A	ENSG00000112773.16	protein_coding
	PF	1.35	IYVISAETF	9		0.0072	Canonical	ATP5PB	ENSG00000116459.11	protein_coding
	PF		GYNVKFDMF	9		0.1224	Canonical	GPX4	ENSG00000167468.16	protein_coding
	PF		FYVPGVAPI	9		0.2751	Canonical	TM9SF4	ENSG00000101337.15	protein_coding
	PF		NYTLYPITF	9		0.0093	Canonical	GXYLT1	ENSG00000151233.11	protein_coding
	PF		NYPVWDTQF	9		0.0396	Canonical	TAF5	ENSG00000148835.11	protein_coding
	0.01	1.33	TYFRFQEEI	9		0.1035	Canonical	TNFSF10	ENSG00000121858.11	protein_coding	Y
	PF		VYSEVHFTL	9		0.0028	Canonical	SYNPO	ENSG00000171992.13	protein_coding
	0.05	1.65	VYINEVRVI	9		0.0399	Canonical	VIRMA	ENSG00000164944.12	protein_coding	Y
	PF		RYPNRFKLW	9		0.043	Canonical	CYB5R1	ENSG00000159348.13	protein_coding
	PF		SYPDLLPTF	9		0.001	Canonical	EIF2D	ENSG00000143486.16	protein_coding
	PF		KYLGLLENL	9		0.0423	Canonical	MYO1C	ENSG00000197879.17	protein_coding
	PF		KYKSAFNKL	9		0.0164	Canonical	DENND4B	ENSG00000198837.10	protein_coding
	0.01	1.35	AYLEAHETF	9		0.0021	Canonical	NUP107	ENSG00000111581.10	protein_coding	Y
	0.05	1.48	EYGRILTRL	9		0.1241	Canonical	STYXL1	ENSG00000127952.17	protein_coding	Y
	PF		DYVRQTWKL	9		0.1094	Canonical	ZAP70	ENSG00000115085.13	protein_coding
	0.01	1.39	IYKDSSTFL	9		0.0509	Canonical	METTL14	ENSG00000145388.15	protein_coding	Y
	0.05	1.63	HYPPVQVLF	9		0.0017	Canonical	MSH6	ENSG00000116062.15	protein_coding	Y
	0.05	1.68	NYVQAVEEF	9		0.0118	Canonical	NASP	ENSG00000132780.17	protein_coding	Y
	0.05	1.68	NYVQAVEEF	9		0.0118	Canonical	AC022182.3	ENSG00000255397.1	processed_pseudogene	Y
	PF	1.47	EYGNIIVTL	9		0.0462	Canonical	PTPRG	ENSG00000144724.20	protein_coding
	PF	1.01	AYGWVSATF	9		0.0095	Canonical	MFSD14B	ENSG00000148110.15	protein_coding
	0.05	1.42	VYTSGIYNI	9		0.014	Canonical	TNS1	ENSG00000079308.19	protein_coding	Y
	0.05	1.21	EYGFISQTL	9		0.0972	Canonical	TMCC3	ENSG00000057704.13	protein_coding	Y
	0.05	1.57	TYSHGNYLF	9		0.0071	Canonical	VAMP7	ENSG00000124333.16_PAR_Y	protein_coding	Y
	0.05	1.57	TYSHGNYLF	9		0.0071	Canonical	VAMP7	ENSG00000124333.16	protein_coding	Y
	PF		VYNTATNQW	9		0.0207	Canonical	HCFC1	ENSG00000172534.14	protein_coding
	PF		VYNTATNQW	9		0.0207	Canonical	HCFC2	ENSG00000111727.12	protein_coding
	PF		PYILSDKLV	9		1.3778	Canonical	VPS8	ENSG00000156931.15	protein_coding
	PF		VYSDYLQTI	9		0.0065	Canonical	PCED1B	ENSG00000179715.13	protein_coding
	PF		KYPNLLNQL	9		0.0175	Canonical	FNTA	ENSG00000168522.13	protein_coding
	PF		KYPNLLNQL	9		0.0175	Canonical	AP003097.1	ENSG00000254502.1	processed_pseudogene
	0.05	1.37	VYAVVRGLF	9		0.0378	Canonical	MFSD13A	ENSG00000138111.14	protein_coding	Y
	PF		QYLKILTSL	9		0.0277	Canonical	HACE1	ENSG00000085382.12	protein_coding
	0.05	1.32	RYRPGTVAL	9		0.1297	Canonical	H3F3B	ENSG00000132475.10	protein_coding	N
	0.05	1.32	RYRPGTVAL	9		0.1297	Canonical	H3F3AP5	ENSG00000226881.5	processed_pseudogene	N
	0.05	1.32	RYRPGTVAL	9		0.1297	Canonical	HIST2H3PS2	ENSG00000273213.3	protein_coding	N
	0.05	1.32	RYRPGTVAL	9		0.1297	Canonical	HIST2H3C	ENSG00000203811.1	protein_coding	N
	0.05	1.32	RYRPGTVAL	9		0.1297	Canonical	HIST2H3A	ENSG00000203852.3	protein_coding	N
	0.05	1.32	RYRPGTVAL	9		0.1297	Canonical	HIST1H3H	ENSG00000278828.1	protein_coding	N
	0.05	1.32	RYRPGTVAL	9		0.1297	Canonical	H3F3A	ENSG00000163041.11	protein_coding	N
	0.05	1.32	RYRPGTVAL	9		0.1297	Canonical	HIST1H3B	ENSG00000286522.1	protein_coding	N
	PF		KYMEDYHQF	9	1xOxidation [M3]	0.0005	Canonical	PPL	ENSG00000118898.16	protein_coding
	0.05	1.32	RYRPGTVAL	9		0.1297	Canonical	HIST3H3	ENSG00000168148.3	protein_coding	N
	0.05	1.32	RYRPGTVAL	9		0.1297	Canonical	HIST1H3E	ENSG00000274750.2	protein_coding	N
	0.05	1.32	RYRPGTVAL	9		0.1297	Canonical	HIST1H3C	ENSG00000287080.1	protein_coding	N
	0.05	1.32	RYRPGTVAL	9		0.1297	Canonical	HIST2H3D	ENSG00000183598.3	protein_coding	N
	PF		VYSKTQQSF	9		0.003	Canonical	UBAP2L	ENSG00000143569.19	protein_coding
	0.05	1.32	RYRPGTVAL	9		0.1297	Canonical	H3F3AP4	ENSG00000235655.3	processed_pseudogene	N
	0.05	1.56	DYAEVSNTF	9		0.0211	Canonical	POLR3C	ENSG00000186141.9	protein_coding	Y
	0.05	1.32	RYRPGTVAL	9		0.1297	Canonical	H3F3AP6	ENSG00000178458.5	processed_pseudogene	N
	0.05	1.32	RYRPGTVAL	9		0.1297	Canonical	HIST1H3A	ENSG00000275714.1	protein_coding	N
	0.05	1.32	RYRPGTVAL	9		0.1297	Canonical	HIST1H3D	ENSG00000197409.7	protein_coding	N
	0.05	1.32	RYRPGTVAL	9		0.1297	Canonical	HIST1H3F	ENSG00000277775.1	protein_coding	N
	0.05	1.32	RYRPGTVAL	9		0.1297	Canonical	HIST1H3I	ENSG00000275379.1	protein_coding	N
	0.05	1.08	AYLVNTYAL	9		0.1272	Canonical	MTCH2	ENSG00000109919.10	protein_coding	Y
	0.05	1.32	RYRPGTVAL	9		0.1297	Canonical	HIST1H3J	ENSG00000197153.4	protein_coding	N
	0.05	1.32	RYRPGTVAL	9		0.1297	Canonical	AL031777.3	ENSG00000282988.2	protein_coding	N
	0.05	1.32	RYRPGTVAL	9		0.1297	Canonical	HIST1H3G	ENSG00000273983.1	protein_coding	N
	0.05	1.32	RYRPGTVAL	9		0.1297	Canonical	H3F3C	ENSG00000188375.5	protein_coding	N
	0.05	1.32	RYRPGTVAL	9		0.1297	Canonical	AC002367.1	ENSG00000226436.1	processed_pseudogene	N
	0.05	1.32	RYRPGTVAL	9		0.1297	Canonical	AC023886.2	ENSG00000250966.2	processed_pseudogene	N
	PF		QYPEVKEFF	9		0.0047	Canonical	ERCC6L2	ENSG00000182150.16	protein_coding
	PF		AYMREHNQL	9		0.0744	Canonical	GPNMB	ENSG00000136235.16	protein_coding
	PF		FYSNIQTVI	9		0.1297	Canonical	POLR2A	ENSG00000181222.16	protein_coding
	0.01	2.09	KYLTEGLLQF	10		0.0152	Canonical	NFE2L1	ENSG00000082641.16	protein_coding	Y
	PF		TYTEVVTEF	9		0.0032	Canonical	AEBP1	ENSG00000106624.11	protein_coding
	0.05	1.81	QWPPDPPLHF	10		0.0276	Canonical	EPAS1	ENSG00000116016.14	protein_coding	Y
	PF		RYTPVGRSFF	10		0.0278	Canonical	AGO4	ENSG00000134698.11	protein_coding
	PF		RYTPVGRSFF	10		0.0278	Canonical	AGO2	ENSG00000123908.12	protein_coding
	PF		RYTPVGRSFF	10		0.0278	Canonical	AGO1	ENSG00000092847.12	protein_coding
	0.05	1.24	VYSEVAAYEF	10		0.0157	Canonical	DRG1	ENSG00000185721.12	protein_coding	N
	PF		RYLPSHRLI	9		0.0305	Canonical	GIMAP6	ENSG00000133561.15	protein_coding
	0.01	1.77	KYITKSFNFY	10		0.4986	Canonical	PARN	ENSG00000140694.17	protein_coding	Y
	PF		KAFASNLPTL	10		0.9659	Canonical	BICRA	ENSG00000063169.10	protein_coding
	PF		IWPGGVLPKF	10		0.0813	Canonical	SNX19	ENSG00000120451.10	protein_coding
	PF		IWPGGVLPKF	10		0.0813	Canonical	SNX19P1	ENSG00000228184.1	processed_pseudogene
	PF		IWPGGVLPKF	10		0.0813	Canonical	SNX19P3	ENSG00000264570.1	processed_pseudogene
	PF		PEYKPTRTPF	10		1.4893	Canonical	CHD7	ENSG00000171316.12	protein_coding
	PF		VYTWPSGNTF	10		0.0097	Canonical	JPH2	ENSG00000149596.6	protein_coding
	PF		TYLPAPEGLKF	11		0.0064	Canonical	TNC	ENSG00000041982.16	protein_coding
	PF		KYLDALNVF	9		0.0055	Canonical	KIAA0355	ENSG00000166398.12	protein_coding
	PF		YIKQIKTF	8		0.4568	Canonical	RBL2	ENSG00000103479.16	protein_coding
	PF		YIKHPHLF	8		0.1119	Canonical	DNTTIP1	ENSG00000101457.13	protein_coding
	0.01	1.32	YATHPFKF	8		0.3803	Canonical	NCOA7	ENSG00000111912.20	protein_coding	Y
	0.01	1.97	YVHMVTHF	8	1xOxidation [M4]	0.7436	Canonical	TMBIM6	ENSG00000139644.13	protein_coding	Y
	0.01	2.04	YGKDFHLI	8		1.5546	Canonical	MIER1	ENSG00000198160.14	protein_coding	Y
	0.01	2.47	VYSRTFTW	8		0.1535	Canonical	MYO1C	ENSG00000197879.17	protein_coding	Y
	PF		YNKVHITL	8		0.8878	Canonical	PCBD1	ENSG00000166228.9	protein_coding
	0.05	1.15	RYGPQFTL	8		0.2091	Canonical	PCDHGA4	ENSG00000262576.3	protein_coding	Y
	0.05	1.15	RYGPQFTL	8		0.2091	Canonical	PCDHGC5	ENSG00000240764.3	protein_coding	Y
	0.05	1.15	RYGPQFTL	8		0.2091	Canonical	PCDHGC4	ENSG00000242419.5	protein_coding	Y
	0.05	1.15	RYGPQFTL	8		0.2091	Canonical	PCDHGA10	ENSG00000253846.2	protein_coding	Y
	0.05	1.15	RYGPQFTL	8		0.2091	Canonical	PCDHGA11	ENSG00000253873.6	protein_coding	Y
	0.05	1.15	RYGPQFTL	8		0.2091	Canonical	PCDHGC3	ENSG00000240184.7	protein_coding	Y
	0.05	1.15	RYGPQFTL	8		0.2091	Canonical	PCDHGA3	ENSG00000254245.2	protein_coding	Y
	0.05	1.15	RYGPQFTL	8		0.2091	Canonical	PCDHGA7	ENSG00000253537.3	protein_coding	Y
	0.05	1.15	RYGPQFTL	8		0.2091	Canonical	PCDHGA8	ENSG00000253767.2	protein_coding	Y
	0.05	1.15	RYGPQFTL	8		0.2091	Canonical	PCDHGA9	ENSG00000261934.2	protein_coding	Y
	0.05	1.15	RYGPQFTL	8		0.2091	Canonical	PCDHGA6	ENSG00000253731.2	protein_coding	Y
	0.05	1.15	RYGPQFTL	8		0.2091	Canonical	PCDHGA2	ENSG00000081853.15	protein_coding	Y
	0.05	1.15	RYGPQFTL	8		0.2091	Canonical	PCDHGA12	ENSG00000253159.3	protein_coding	Y
	0.05	1.15	RYGPQFTL	8		0.2091	Canonical	PCDHGA1	ENSG00000204956.5	protein_coding	Y
	0.05	1.15	RYGPQFTL	8		0.2091	Canonical	PCDHGB2	ENSG00000253910.2	protein_coding	Y
	0.05	1.15	RYGPQFTL	8		0.2091	Canonical	PCDHGA5	ENSG00000253485.2	protein_coding	Y
	0.05	1.15	RYGPQFTL	8		0.2091	Canonical	PCDHGB6	ENSG00000253305.2	protein_coding	Y
	0.05	1.15	RYGPQFTL	8		0.2091	Canonical	PCDHGB7	ENSG00000254122.2	protein_coding	Y
	0.05	1.15	RYGPQFTL	8		0.2091	Canonical	PCDHGB3	ENSG00000262209.3	protein_coding	Y
	0.05	1.15	RYGPQFTL	8		0.2091	Canonical	PCDHGB1	ENSG00000254221.2	protein_coding	Y
	0.05	1.15	RYGPQFTL	8		0.2091	Canonical	PCDHGB4	ENSG00000253953.2	protein_coding	Y
	0.05	1.15	RYGPQFTL	8		0.2091	Canonical	PCDHGB5	ENSG00000276547.1	protein_coding	Y
	PF		HYGKVYLL	8		0.3456	Canonical	VPS41	ENSG00000006715.16	protein_coding
	0.01	1.9	TYDKGYQF	8		0.1745	Canonical	PEX5	ENSG00000139197.10	protein_coding	Y
	0.05	1.79	AYGFVARI	8		1.667	Canonical	VWF	ENSG00000110799.13	protein_coding	Y
	0.01	2.58	YSHVIQKL	8		1.0111	Canonical	SDS	ENSG00000135094.11	protein_coding	Y
	PF		YDTVFKHF	8		0.7049	Canonical	SP140L	ENSG00000185404.16	protein_coding
	PF		FYGHFFRF	8		0.1729	Canonical	ELMOD2	ENSG00000179387.10	protein_coding
	PF		YIDKVRSL	8		1.7749	Canonical	LMNB1	ENSG00000113368.12	protein_coding
	PF		YYTVAHAI	8		0.9902	Canonical	SMARCA2	ENSG00000080503.24	protein_coding
	PF		KYGNANVW	8		0.816	Canonical	PPP2CA	ENSG00000113575.10	protein_coding
	PF		KYGNANVW	8		0.816	Canonical	PPP2CB	ENSG00000104695.13	protein_coding
	0.01	1.31	AWPKVLKI	8		1.1223	Canonical	EPB41L3	ENSG00000082397.17	protein_coding	Y
	PF		IYCDVREF	8		0.4371	Canonical	LGALS8	ENSG00000116977.18	protein_coding
	PF		IYGSSHSW	8		0.2469	Canonical	DUOX1	ENSG00000137857.17	protein_coding
	PF		IYGSSHSW	8		0.2469	Canonical	DUOX2	ENSG00000140279.12	protein_coding
	0.01	1.56	RYPDSHQLF	9		0.0024	Canonical	G3BP2	ENSG00000138757.14	protein_coding	Y
	0.01	2.25	DYLEKYYKF	9		0.0049	Canonical	NNMT	ENSG00000166741.7	protein_coding	Y
	0.01	2.47	KYIKDDFRF	9		0.0095	Canonical	RIOK3	ENSG00000101782.15	protein_coding	Y
	0.05	1.96	RYAVIGADL	9		0.3936	Canonical	LCMT1	ENSG00000205629.12	protein_coding	Y
	0.01	3	IYQRDPLKL	9		0.018	Canonical	STAT6	ENSG00000166888.12	protein_coding	Y
	PF		IYVQEMAKL	9		0.0562	Canonical	H2AFY2	ENSG00000099284.14	protein_coding
	PF		IYVQEMAKL	9		0.0562	Canonical	H2AFY	ENSG00000113648.16	protein_coding
	0.01	2.96	RYSPVLSRF	9		0.002	Canonical	COG1	ENSG00000166685.12	protein_coding	Y
	0.01	1.14	PYGNIQSRL	9		0.2465	Canonical	GALNT2	ENSG00000143641.10	protein_coding	Y
	0.01	2.33	RYLEQLHQL	9		0.0039	Canonical	STAT3	ENSG00000168610.14	protein_coding	Y
	0.01	2.58	TYQEVAQKF	9		0.0018	Canonical	ADA2	ENSG00000093072.18	protein_coding	Y
	0.01	2.68	KYQEEFEHF	9		0.0011	Canonical	LMAN1	ENSG00000074695.6	protein_coding	Y
	0.01	2.37	RYLEKPMEI	9		0.0104	Canonical	STAT3	ENSG00000168610.14	protein_coding	Y
	0.01	1.89	KYMKIFHKF	9		0.0004	Canonical	ZNF681	ENSG00000196172.9	protein_coding	Y
	PF		VYSLIKNKI	9		0.0476	Canonical	PRKAG2	ENSG00000106617.14	protein_coding
	0.01	1.66	VYVQELQKL	9		0.0094	Canonical	EEA1	ENSG00000102189.16	protein_coding	Y
	0.01	1.89	SYLESFYHM	9		0.0099	Canonical	ERAP2	ENSG00000164308.16	protein_coding	Y
	0.01	2.24	RYLEVMRKL	9		0.0208	Canonical	PTPA	ENSG00000119383.19	protein_coding	Y
	PF		KYDEGLYRF	9		0.007	Canonical	DCLRE1A	ENSG00000198924.8	protein_coding
	0.01	2.21	LFIATSQKF	9		0.054	Canonical	NCAPH2	ENSG00000025770.19	protein_coding	Y
	0.01	2.14	TYNPAFSRL	9		0.0099	Canonical	TMEM181	ENSG00000146433.8	protein_coding	Y
	0.01	1.65	FYITSRTQF	9		0.0192	Canonical	SRC	ENSG00000197122.11	protein_coding	Y
	PF		PWPKVLKI	8		1.9175	Canonical	EPB41	ENSG00000159023.21	protein_coding
	0.01	2.28	RYSSMAASF	9		0.0099	Canonical	PDZK1IP1	ENSG00000162366.8	protein_coding	Y
	0.05	1.63	KYDEFIHKI	9		0.0151	Canonical	CALML4	ENSG00000129007.14	protein_coding	Y
	PF		YIDTIWKI	8		0.827	Canonical	CARNMT1	ENSG00000156017.13	protein_coding
	PF		YLKTVDKF	8		0.6184	Canonical	TRAPPC2	ENSG00000196459.14	protein_coding
	PF		YLKTVDKF	8		0.6184	Canonical	TRAPPC2B	ENSG00000256060.2	protein_coding
	0.05	1.63	KYDEFIHKI	9		0.0151	Canonical	AC107871.1	ENSG00000260007.3	protein_coding	Y
	0.01	1.45	LYQKDFLRI	9		0.0458	Canonical	FRMD6	ENSG00000139926.15	protein_coding	Y
	PF		IYAVVHLL	8		0.153	Canonical	ARFGEF3	ENSG00000112379.9	protein_coding
	PF		RYLPKLKAF	9		0.0174	Canonical	CRY2	ENSG00000121671.11	protein_coding
	PF		VYVNINRI	8		0.83	Canonical	TRIO	ENSG00000038382.20	protein_coding
	0.01	2.43	SYIAHLRQL	9		0.05	Canonical	MSC	ENSG00000178860.8	protein_coding	Y
	0.01	2.43	SYIAHLRQL	9		0.05	Canonical	TCF21	ENSG00000118526.6	protein_coding	Y
	0.01	1.98	NYATRIVTL	9		0.0318	Canonical	BIRC6	ENSG00000115760.14	protein_coding	Y
	0.01	2.54	TYRNVMEQF	9		0.0193	Canonical	BAIAP2L1	ENSG00000006453.14	protein_coding	Y
	0.01	1.71	DYAYLREHF	9		0.1446	Canonical	ZNF598	ENSG00000167962.14	protein_coding	Y
	PF		APKPYHKF	8		1.8394	Canonical	TNIK	ENSG00000154310.17	protein_coding
	0.01	1.15	VYQVLQEHL	9		0.0181	Canonical	BMP7	ENSG00000101144.13	protein_coding	Y
	PF		YLPHVARL	8		1.1909	Canonical	SURF4	ENSG00000148248.14	protein_coding
	PF		APKPYHKF	8		1.8394	Canonical	MINK1	ENSG00000141503.17	protein_coding
	PF		YLEKYYKF	8		0.1778	Canonical	NNMT	ENSG00000166741.7	protein_coding
	PF		LYNHVKQLL	9		0.0602	Canonical	XPO5	ENSG00000124571.18	protein_coding
	0.01	1.55	DYDSVFHHL	9		0.0747	Canonical	EPC1	ENSG00000120616.16	protein_coding	Y
	PF		PFYDKPMRI	9		0.3996	Canonical	SNRPA	ENSG00000077312.9	protein_coding
	PF		APKPYHKF	8		1.8394	Canonical	MAP4K4	ENSG00000071054.16	protein_coding
	PF		KYITEVSRW	9		0.0233	Canonical	CEP135	ENSG00000174799.10	protein_coding
	0.01	1.51	VQPSKYHFL	9		0.2513	Canonical	MAGEF1	ENSG00000177383.4	protein_coding	Y
	PF		IYKKYPNMF	9		0.0079	Canonical	AHCYL2	ENSG00000158467.16	protein_coding
	0.01	1.97	TYIPVPAKI	9		0.0054	Canonical	ST3GAL1	ENSG00000008513.16	protein_coding	Y
	0.01	1.38	QYVSAFSKL	9		0.0467	Canonical	STOML2	ENSG00000165283.16	protein_coding	Y
	0.01	2.13	TYLEKFQNL	9		0.0048	Canonical	CLUAP1	ENSG00000103351.13	protein_coding	Y
	PF		TYLTNHLRL	9		0.0376	Canonical	ZNF697	ENSG00000143067.5	protein_coding
	PF		KYNETFHFL	9		0.0037	Canonical	UNC13B	ENSG00000198722.14	protein_coding
	0.01	2.01	NYVEVTRKW	9		0.0671	Canonical	MTX1	ENSG00000173171.14	protein_coding	Y
	0.01	2.16	QYLERLKQF	9		0.0156	Canonical	ABHD17C	ENSG00000136379.12	protein_coding	Y
	0.01	2.16	QYLERLKQF	9		0.0156	Canonical	ABHD17B	ENSG00000107362.13	protein_coding	Y
	PF		KYFLWVVKF	9		0.0223	Canonical	GRB2	ENSG00000177885.15	protein_coding
	0.01	2.01	NYVEVTRKW	9		0.0671	Canonical	MTX1P1	ENSG00000236675.1	unprocessed_pseudogene	Y
	PF		LYRLKFNEF	9		0.1272	Canonical	ARL4C	ENSG00000188042.8	protein_coding
	PF		HYKLDWHRF	9		0.0288	Canonical	ANKZF1	ENSG00000163516.13	protein_coding
	PF		IYINSRSVF	9		0.0369	Canonical	CAPN5	ENSG00000149260.18	protein_coding
	0.05	1.25	TYGIKHMKF	9		0.0164	Canonical	PIGK	ENSG00000142892.15	protein_coding	Y
	0.01	2.6	KYMETIEKL	9		0.0044	Canonical	PPP1R21	ENSG00000162869.16	protein_coding	Y
	0.01	2.34	VYMELSQKL	9	1xOxidation [M3]	0.0038	Canonical	FRMD6	ENSG00000139926.15	protein_coding	Y
	PF		RYRPQHIFF	9		0.0152	Canonical	CYB561	ENSG00000008283.16	protein_coding
	PF		EYLEAHLKF	9		0.0072	Canonical	USP24	ENSG00000162402.14	protein_coding
	0.01	1.7	SYVHYVFRL	9		0.0435	Canonical	DOCK8	ENSG00000107099.15	protein_coding	Y
	0.01	2.52	IYQKAFEHL	9		0.0043	Canonical	BBS4	ENSG00000140463.14	protein_coding	Y
	0.01	2.1	EQPYKWEKF	9		0.5292	Canonical	ZNF254	ENSG00000213096.10	protein_coding	Y
	0.01	1.86	YFKDTHPKF	9		0.0196	Canonical	CYB5R3	ENSG00000100243.21	protein_coding	Y
	0.05	0.91	QYNMNFEKL	9		0.0717	Canonical	CASP7	ENSG00000165806.19	protein_coding	Y
	PF		TYMPHVHIL	9	1xOxidation [M3]	0.0038	Canonical	FBXO38	ENSG00000145868.16	protein_coding
	0.05	1.52	EYLKVDAQF	9		0.0267	Canonical	YARS	ENSG00000134684.10	protein_coding	Y
	PF		VYLRETTLI	9		0.0164	Canonical	DHX29	ENSG00000067248.10	protein_coding
	PF		SYNNFFRMF	9		0.0072	Canonical	PPP2R2B	ENSG00000156475.18	protein_coding
	PF		SYNNFFRMF	9		0.0072	Canonical	PPP2R2A	ENSG00000221914.11	protein_coding
	PF		SYNNFFRMF	9		0.0072	Canonical	PPP2R2D	ENSG00000175470.20	protein_coding
	0.01	2.1	KYAHMINGF	9		0.0146	Canonical	ADSS	ENSG00000035687.10	protein_coding	Y
	0.01	2.61	QYLPHVARL	9		0.0142	Canonical	SURF4	ENSG00000148248.14	protein_coding	Y
	PF		RYVWWKKSL	9		0.3427	Canonical	UPF2	ENSG00000151461.20	protein_coding
	PF		AYVQALARF	9		0.0152	Canonical	ARFGEF1	ENSG00000066777.9	protein_coding
	PF		SYARHFLDF	9		0.0119	Canonical	ZADH2	ENSG00000180011.7	protein_coding
	PF		AYVQALARF	9		0.0152	Canonical	ARFGEF2	ENSG00000124198.9	protein_coding
	PF		IYKWITDNF	9		0.011	Canonical	FOXJ1	ENSG00000129654.8	protein_coding
	0.01	1.6	NYADQISRL	9		0.1204	Canonical	MAPK8IP3	ENSG00000138834.12	protein_coding	Y
	0.05	1.56	VFKPISSTW	9		0.0466	Canonical	BIRC6	ENSG00000115760.14	protein_coding	Y
	0.01	1.6	NYADQISRL	9		0.1204	Canonical	SPAG9	ENSG00000008294.21	protein_coding	Y
	0.01	1.98	SYPSAFSKL	9		0.0273	Canonical	MARF1	ENSG00000166783.22	protein_coding	Y
	0.01	1.21	EYNTVASKF	9		0.046	Canonical	PARP14	ENSG00000173193.15	protein_coding	Y
	0.01	2.25	AYVEKVERL	9		0.0462	Canonical	AMOTL2	ENSG00000114019.14	protein_coding	Y
	0.05	1.34	QYESKVFYL	9		0.0912	Canonical	YWHAG	ENSG00000170027.7	protein_coding	Y
	0.05	1.34	QYESKVFYL	9		0.0912	Canonical	YWHAH	ENSG00000128245.15	protein_coding	Y
	PF		KYTAVVKMI	9		0.1208	Canonical	KIN	ENSG00000151657.12	protein_coding
	0.01	1.82	VYIDRVRSL	9		0.0206	Canonical	LMNA	ENSG00000160789.20	protein_coding	Y
	0.01	2.11	IYQQVRDEL	9		0.0653	Canonical	SATB2	ENSG00000119042.17	protein_coding	Y
	0.05	1.44	VYLAAVNRL	9		0.0139	Canonical	PLXND1	ENSG00000004399.12	protein_coding	Y
	PF		VYNPELDKW	9		0.0343	Canonical	KLHL11	ENSG00000178502.6	protein_coding
	PF		LYLTNCEKL	9		0.1987	Canonical	ZER1	ENSG00000160445.11	protein_coding
	PF		VYGPMKNYL	9		0.0269	Canonical	ANPEP	ENSG00000166825.14	protein_coding
	0.05	1.93	RYIKALETL	9		0.0093	Canonical	RAD50	ENSG00000113522.14	protein_coding	Y
	0.05	1.93	RYIKALETL	9		0.0093	Canonical	AC116366.3	ENSG00000283782.2	protein_coding	Y
	0.01	2.43	AYATHPFKF	9		0.0036	Canonical	NCOA7	ENSG00000111912.20	protein_coding	Y
	0.01	2.12	KYPSDLPYM	9	1xOxidation [M9]	0.058	Canonical	ERG	ENSG00000157554.19	protein_coding	Y
	PF		VYKEAMNHL	9		0.0183	Canonical	DHFR2	ENSG00000178700.7	protein_coding
	0.01	1.88	VYIDKVRSL	9		0.0145	Canonical	LMNB1	ENSG00000113368.12	protein_coding	Y
	0.05	2.13	RYGDGGSTF	9		0.0154	Canonical	HNRNPH1	ENSG00000169045.17	protein_coding	Y
	0.01	2.34	IYLRDPVQV	9		0.1272	Canonical	TPP2	ENSG00000134900.12	protein_coding	Y
	PF		FYTKRFQEL	9		0.0407	Canonical	PFAS	ENSG00000178921.14	protein_coding
	PF		AFIKKSHLL	9		0.1573	Canonical	ZNF684	ENSG00000117010.17	protein_coding
	PF	1.55	TYLRKIPRF	9		0.0026	Canonical	CCDC14	ENSG00000175455.15	protein_coding
	PF	1.11	RYTTEFHEL	9		0.0125	Canonical	WEE1	ENSG00000166483.11	protein_coding
	PF		KYGVHEAIF	9		0.0911	Canonical	PPARD	ENSG00000112033.14	protein_coding
	PF		KYAQWEESL	9		0.0911	Canonical	CRNKL1	ENSG00000101343.14	protein_coding
	PF		VYQDYHTVW	9		0.015	Canonical	COMMD8	ENSG00000169019.11	protein_coding
	0.01	1.83	RYLDASNEL	9		0.0497	Canonical	NEK4	ENSG00000114904.13	protein_coding	Y
	PF		AYQKQPTIF	9		0.0175	Canonical	RPS11P5	ENSG00000232888.4	processed_pseudogene
	PF		AYQKQPTIF	9		0.0175	Canonical	RPS11	ENSG00000142534.7	protein_coding
	PF		TYAPAIHQI	9		0.0027	Canonical	ARID2	ENSG00000189079.17	protein_coding
	0.01	2.01	KYPDRVPVI	9		0.0193	Canonical	GABARAPL1	ENSG00000139112.11	protein_coding	Y
	0.01	2.01	KYPDRVPVI	9		0.0193	Canonical	GABARAP	ENSG00000170296.10	protein_coding	Y
	0.01	2.01	KYPDRVPVI	9		0.0193	Canonical	GABARAPL2	ENSG00000034713.8	protein_coding	Y
	PF		IYSTTLWHL	9		0.01	Canonical	CDC27	ENSG00000004897.12	protein_coding
	PF		IYSTTLWHL	9		0.01	Canonical	CDC27P1	ENSG00000233786.1	processed_pseudogene
	PF		IYSTTLWHL	9		0.01	Canonical	CDC27P2	ENSG00000237447.1	processed_pseudogene
	0.01	2.01	KYPDRVPVI	9		0.0193	Canonical	AC016559.2	ENSG00000250330.1	processed_pseudogene	Y
	0.01	2.34	EYRPEFSNF	9		0.0421	Canonical	PARP4	ENSG00000102699.6	protein_coding	Y
	0.01	2.34	EYRPEFSNF	9		0.0421	Canonical	PARP4P2	ENSG00000224976.2	unprocessed_pseudogene	Y
	PF		KQQKLWHLF	9		0.1837	Canonical	C16orf72	ENSG00000182831.12	protein_coding
	0.05	1.26	LYMKNGQGF	9		0.0196	Canonical	RAP1B	ENSG00000127314.18	protein_coding	Y
	0.05	1.26	LYMKNGQGF	9		0.0196	Canonical	RAP1A	ENSG00000116473.14	protein_coding	Y
	0.05	1.26	LYMKNGQGF	9		0.0196	Canonical	AC113404.3	ENSG00000254893.6	translated_processed_pseudogene	Y
	0.05	1.26	LYMKNGQGF	9		0.0196	Canonical	RAP1AP	ENSG00000258769.1	processed_pseudogene	Y
	PF		KYTKNIVSW	9		0.0114	Canonical	ARHGAP29	ENSG00000137962.13	protein_coding
	0.01	2.37	NYIRITSEI	9		0.0679	Canonical	DHX32	ENSG00000089876.11	protein_coding	Y
	0.05	1.51	RYMSINTHL	9		0.0125	Canonical	CSNK1G1	ENSG00000169118.18	protein_coding	Y
	0.05	1.51	RYMSINTHL	9		0.0125	Canonical	CSNK1G3	ENSG00000151292.17	protein_coding	Y
	0.05	1.51	RYMSINTHL	9		0.0125	Canonical	CSNK1G2	ENSG00000133275.16	protein_coding	Y
	0.05	1.51	RYMSINTHL	9		0.0125	Canonical	AC087632.1	ENSG00000259316.11	protein_coding	Y
	PF		KYFALPHKI	9		0.0077	Canonical	TUT7	ENSG00000083223.18	protein_coding
	PF		VMPKKVFKI	9		0.1921	Canonical	XYLT1	ENSG00000103489.11	protein_coding
	PF		QYLELAHSL	9		0.0247	Canonical	TONSL	ENSG00000160949.17	protein_coding
	PF		VYTDRFHLI	9		0.0058	Canonical	HEATR5A	ENSG00000129493.15	protein_coding
	PF		EMEEKYYRF	9		0.6476	Canonical	CHD3	ENSG00000170004.16	protein_coding
	0.01	1.69	VFTPVVQRI	9		0.0835	Canonical	CMIP	ENSG00000153815.16	protein_coding	Y
	PF		IFKTLSSKF	9		0.1401	Canonical	ATXN2L	ENSG00000168488.18	protein_coding
	PF		LYHDIFSRL	9		0.0241	Canonical	NFE2L3	ENSG00000050344.9	protein_coding
	PF		YYASIAKAF	9		0.0146	Canonical	ACADM	ENSG00000117054.13	protein_coding
	PF		LYHDIFSRL	9		0.0241	Canonical	NFE2L3P1	ENSG00000267497.1	processed_pseudogene
	0.01	3.03	KYVPAIAHL	9		0.0082	Canonical	CPVL	ENSG00000106066.15	protein_coding	Y
	PF		AYNRIVDAL	9		0.2361	Canonical	FNIP1	ENSG00000217128.12	protein_coding
	0.05	0.96	LYQHAVQYF	9		0.0042	Canonical	VPS4B	ENSG00000119541.10	protein_coding	Y
	0.05	1.45	VYVAALKTL	9		0.0378	Canonical	MAP3K1	ENSG00000095015.6	protein_coding	Y
	PF		RYKATGLHF	9		0.0248	Canonical	IQGAP1	ENSG00000140575.13	protein_coding
	PF		EYLGKLVRF	9		0.0105	Canonical	RSAD2	ENSG00000134321.12	protein_coding
	0.01	1.65	KYAPRFNGF	9		0.0055	Canonical	USP32	ENSG00000170832.13	protein_coding	Y
	0.01	1.65	KYAPRFNGF	9		0.0055	Canonical	AC053481.2	ENSG00000263887.7	transcribed_unprocessed_pseudogene	Y
	0.01	1.97	YYTRLGNDF	9		0.1076	Canonical	AC245033.1	ENSG00000260836.2	protein_coding	Y
	0.01	1.97	YYTRLGNDF	9		0.1076	Canonical	RPS17	ENSG00000182774.13	protein_coding	Y
	0.01	1.97	YYTRLGNDF	9		0.1076	Canonical	AL451050.1	ENSG00000213068.3	processed_pseudogene	Y
	0.05	1.88	RYASINTHL	9		0.0187	Canonical	CSNK1D	ENSG00000141551.14	protein_coding	Y
	PF		EFLTKTAKF	9		0.1952	Canonical	PPP4R3B	ENSG00000275052.5	protein_coding
	PF		EFLTKTAKF	9		0.1952	Canonical	PPP4R3A	ENSG00000100796.17	protein_coding
	0.05	1.88	RYASINTHL	9		0.0187	Canonical	CSNK1E	ENSG00000213923.12	protein_coding	Y
	0.05	1.88	RYASINTHL	9		0.0187	Canonical	TPTEP2-CSNK1E	ENSG00000283900.1	protein_coding	Y
	0.01	1.56	DYMKTTSNF	9		0.0268	Canonical	NEMF	ENSG00000165525.18	protein_coding	Y
	0.01	1.5	IYTNLNQKI	9		0.0318	Canonical	EXOC6B	ENSG00000144036.15	protein_coding	Y
	0.05	1.25	SYGSVFKAI	9		0.13	Canonical	STK3	ENSG00000104375.17	protein_coding	Y
	0.05	1.38	VLPGHFNTF	9		0.0479	Canonical	MBLAC2	ENSG00000176055.10	protein_coding	Y
	0.05	1.58	EYAKIEETM	9		0.2503	Canonical	CADPS2	ENSG00000081803.16	protein_coding	Y
	0.05	1.57	AYLHTTTTF	9		0.0037	Canonical	ABCC3	ENSG00000108846.16	protein_coding	Y
	PF		RYHLVQQLF	9		0.0042	Canonical	FANCF	ENSG00000183161.5	protein_coding
	0.01	2.1	RYTAILNQI	9		0.042	Canonical	COL14A1	ENSG00000187955.12	protein_coding	Y
	0.01	1.7	VGARIYHTI	9		1.6523	Canonical	MGST1	ENSG00000008394.13	protein_coding	Y
	0.05	1.44	NQSQGYNQW	9		1.3725	Canonical	HNRNPU	ENSG00000153187.20	protein_coding	Y
	0.05	1.44	NQSQGYNQW	9		1.3725	Canonical	HNRNPUP1	ENSG00000259051.1	processed_pseudogene	Y
	PF		YYDPHQATF	9		0.0029	Canonical	PCNX1	ENSG00000100731.15	protein_coding
	PF		TYDSVTDKF	9		0.046	Canonical	USP34	ENSG00000115464.14	protein_coding
	PF		KYLAHLEQL	9		0.0191	Canonical	GBP2	ENSG00000162645.13	protein_coding
	0.05	1.68	YYQSSVQYL	9		0.0066	Canonical	DNAAF5	ENSG00000164818.16	protein_coding	Y
	PF		AYVPGFAHI	9		0.0171	Canonical	CUEDC2	ENSG00000107874.11	protein_coding
	0.05	1.27	VYTSVQAQY	9		0.3051	Canonical	AAK1	ENSG00000115977.19	protein_coding	Y
	PF		NQEKHFYTF	9		0.3726	Canonical	DIS3	ENSG00000083520.15	protein_coding
	PF		YYVRAVLHL	9		0.0136	Canonical	CYBA	ENSG00000051523.11	protein_coding
	0.05	1.89	EYQKVGQSF	9		0.0229	Canonical	SNX18	ENSG00000178996.14	protein_coding	Y
	PF		KYVKVFDKF	9		0.0037	Canonical	ZNF107	ENSG00000196247.11	protein_coding
	PF		VFTGVVTKL	9		0.2595	Canonical	CCAR1	ENSG00000060339.14	protein_coding
	PF		EYNSDLHQF	9		0.0152	Canonical	BUB1	ENSG00000169679.15	protein_coding
	0.01	1.89	IYTEVRELV	9		0.2459	Canonical	CKAP4	ENSG00000136026.14	protein_coding	Y
	0.01	1.74	QYLLHSPEL	9		0.0996	Canonical	ATOH1	ENSG00000172238.4	protein_coding	Y
	PF	1.9	RYDPHLNRW	9		0.0156	Canonical	KLHL26	ENSG00000167487.12	protein_coding
	PF		PYAQQLRVF	9		0.0962	Canonical	DHX33	ENSG00000005100.13	protein_coding
	PF		EYHKWRTYF	9		0.0596	Canonical	MLXIP	ENSG00000175727.14	protein_coding
	0.01	1.81	QYEKLFHKW	9		0.0168	Canonical	ORC2	ENSG00000115942.9	protein_coding	Y
	0.05	1.56	QYGSALAHF	9		0.0071	Canonical	PAQR8	ENSG00000170915.9	protein_coding	Y
	PF		QYLSRFESW	9		0.0107	Canonical	BHLHE41	ENSG00000123095.6	protein_coding
	0.05	1.44	SYGIIAQEI	9		0.077	Canonical	GUCY2C	ENSG00000070019.5	protein_coding	Y
	PF		VYTKANPTF	9		0.0032	Canonical	SPRED2	ENSG00000198369.10	protein_coding
	0.01	1.48	NYPDEFTKL	9		0.0647	Canonical	NF1	ENSG00000196712.17	protein_coding	Y
	0.01	2.11	QYIDVSHVF	9		0.0023	Canonical	RFX2	ENSG00000087903.13	protein_coding	Y
	PF		YYTSRPALF	9		0.0046	Canonical	CDIPT	ENSG00000103502.14	protein_coding
	0.01	1.56	QYIEELQKF	9		0.002	Canonical	RALGPS2	ENSG00000116191.17	protein_coding	Y
	PF		RVQDKYFHI	9		0.8632	Canonical	ABLIM2	ENSG00000163995.20	protein_coding
	PF		VYQKLLERM	9		0.0375	Canonical	TGFBI	ENSG00000120708.17	protein_coding
	0.01	2.15	PYKVTQDEL	9		0.5503	Canonical	NCL	ENSG00000115053.16	protein_coding	Y
	PF		IYVPSSYHL	9		0.0037	Canonical	SLF2	ENSG00000119906.13	protein_coding
	PF		RAARYYYYW	9		1.0313	Canonical	FRMD6	ENSG00000139926.15	protein_coding
	PF		MYIFKQPHF	9		0.0055	Canonical	PHYHD1	ENSG00000175287.19	protein_coding
	PF		IYVRHSNLM	9		0.1577	Canonical	EPB41L2	ENSG00000079819.19	protein_coding
	0.01	2	NYSSAVQKF	9		0.0051	Canonical	OPHN1	ENSG00000079482.13	protein_coding	Y
	0.01	1.99	PLPKETWKF	9		0.2084	Canonical	AOAH	ENSG00000136250.11	protein_coding	Y
	PF		NYSLIDKHL	9		0.2996	Canonical	ARHGAP10	ENSG00000071205.11	protein_coding
	0.01	2.09	IYTSSVNRL	9		0.0257	Canonical	COPB2	ENSG00000184432.10	protein_coding	Y
	0.01	2.09	NYIEKVVAI	9		0.0695	Canonical	ABI1	ENSG00000136754.17	protein_coding	Y
	0.01	2.18	VMAPRTLLL	9		0.4197	Canonical	HLA-A	ENSG00000206503.13	protein_coding	Y
	0.01	2.18	VMAPRTLLL	9		0.4197	Canonical	HLA-L	ENSG00000243753.5	transcribed_unprocessed_pseudogene	Y
	PF		YYTQKLHLL	9		0.009	Canonical	KCNK5	ENSG00000164626.9	protein_coding
	0.01	1.92	NYVATTHMI	9		0.0998	Canonical	NR4A2	ENSG00000153234.14	protein_coding	Y
	0.01	2.18	VMAPRTLLL	9		0.4197	Canonical	HLA-V	ENSG00000181126.13	transcribed_unprocessed_pseudogene	Y
	0.01	1.98	VWNPRTHQF	9		0.0082	Canonical	ATP1B2	ENSG00000129244.9	protein_coding	Y
	0.01	1.82	VYANGIRNI	9		0.0441	Canonical	2020-03-06	ENSG00000145495.16	protein_coding	Y
	PF		VYENKYVKF	9		0.0065	Canonical	PYM1	ENSG00000170473.17	protein_coding
	PF		SYLKSANSW	9		0.0289	Canonical	KIAA0513	ENSG00000135709.12	protein_coding
	PF		NYTEIREKL	9		0.1625	Canonical	FAM193B	ENSG00000146067.16	protein_coding
	PF		KYHTHLLQF	9		0.0056	Canonical	ABCD1	ENSG00000101986.12	protein_coding
	PF		RYPVILRRF	9		0.0073	Canonical	OPLAH	ENSG00000178814.17	protein_coding
	PF		KYHTHLLQF	9		0.0056	Canonical	ABCD2	ENSG00000173208.4	protein_coding
	PF		NYGDQVQHF	9		0.0076	Canonical	GRAP	ENSG00000154016.13	protein_coding
	0.01	1.8	TYLDKVENI	9		0.0131	Canonical	IFIT1	ENSG00000185745.10	protein_coding	Y
	0.01	1.69	TYIDKSTQL	9		0.0225	Canonical	C10orf88	ENSG00000119965.13	protein_coding	Y
	0.01	1.95	QYNTYPIKL	9		0.056	Canonical	SEC61A1	ENSG00000058262.10	protein_coding	Y
	PF		KYLETYLNL	9		0.0089	Canonical	PON2	ENSG00000105854.13	protein_coding
	0.01	1.8	TYLDKVENI	9		0.0131	Canonical	IFIT1P1	ENSG00000215515.2	processed_pseudogene	Y
	PF		SYAQHIASI	9		0.0455	Canonical	MTCH2	ENSG00000109919.10	protein_coding
	0.01	1.86	NYIKRNWRI	9		0.0605	Canonical	CSE1L	ENSG00000124207.17	protein_coding	Y
	0.01	1.32	NYLSTMKNF	9		0.0229	Canonical	MGAT4B	ENSG00000161013.17	protein_coding	Y
	PF		VFTSVRQKI	9		0.4151	Canonical	SMARCA4	ENSG00000127616.18	protein_coding
	0.01	1.43	QYTVFHSLI	9		0.1905	Canonical	GAK	ENSG00000178950.17	protein_coding	Y
	0.01	2.57	VYHHLVETL	9		0.0103	Canonical	GGT5	ENSG00000099998.17	protein_coding	Y
	0.01	1.49	VYKPAQNSW	9		0.0235	Canonical	KBTBD7	ENSG00000120696.8	protein_coding	Y
	0.01	1.49	VYKPAQNSW	9		0.0235	Canonical	KBTBD6	ENSG00000165572.7	protein_coding	Y
	0.01	1.16	VYKKYPNVF	9		0.0139	Canonical	AHCYL1	ENSG00000168710.18	protein_coding	Y
	PF		TYIDTRTVF	9		0.0178	Canonical	CAPN6	ENSG00000077274.9	protein_coding
	PF		KYSSNLGNF	9		0.0302	Canonical	API5	ENSG00000166181.13	protein_coding
	PF		YYHARVYEF	9		0.0021	Canonical	PSMD3	ENSG00000108344.15	protein_coding
	0.01	1.82	TYPENWRAF	9		0.0143	Canonical	AP002990.1	ENSG00000255508.7	protein_coding	Y
	0.01	1.82	TYPENWRAF	9		0.0143	Canonical	EEF1G	ENSG00000254772.10	protein_coding	Y
	0.01	1.82	TYPENWRAF	9		0.0143	Canonical	AC008038.1	ENSG00000283041.1	processed_pseudogene	Y
	0.01	1.82	TYPENWRAF	9		0.0143	Canonical	CHCHD3	ENSG00000106554.13	protein_coding	Y
	0.01	1.82	TYPENWRAF	9		0.0143	Canonical	EEF1GP1	ENSG00000186676.3	processed_pseudogene	Y
	0.01	1.7	VYLIEHPSL	9		0.0199	Canonical	ASPA	ENSG00000108381.11	protein_coding	Y
	PF		TWTPSALKF	9		0.0369	Canonical	COL6A2	ENSG00000142173.15	protein_coding
	0.01	1.58	YYIRETENF	9		0.0023	Canonical	SCN7A	ENSG00000136546.16	protein_coding	Y
	PF		QYLAAVRKF	9		0.0095	Canonical	GNPAT	ENSG00000116906.13	protein_coding
	PF		QYLRNPPKL	9		0.0232	Canonical	SHC1	ENSG00000160691.18	protein_coding
	PF		NYNEKIYEL	9		0.0269	Canonical	UFD1	ENSG00000070010.19	protein_coding
	PF		RYVVTSVSW	9		0.0448	Canonical	EIF3B	ENSG00000106263.18	protein_coding
	PF		SFITHSLKF	9		0.0394	Canonical	CEP192	ENSG00000101639.18	protein_coding
	PF		RFLVKSHYI	9		0.2925	Canonical	RFX7	ENSG00000181827.14	protein_coding
	PF		YFAERVTSL	9		0.2765	Canonical	AL928654.3	ENSG00000257341.5	protein_coding
	PF		YFAERVTSL	9		0.2765	Canonical	CRIP1	ENSG00000213145.9	protein_coding
	PF		YFAERVTSL	9		0.2765	Canonical	CRIP1P4	ENSG00000182351.7	processed_pseudogene
	PF		YFAERVTSL	9		0.2765	Canonical	CRIP1P2	ENSG00000238225.1	processed_pseudogene
	PF		FMYDRPLRL	9	1xOxidation [M2]	0.6041	Canonical	COL6A3	ENSG00000163359.15	protein_coding
	PF		QYSDVNNRW	9		0.0607	Canonical	SPTBN1	ENSG00000115306.16	protein_coding
	PF		TYKDTHRKF	9		0.0624	Canonical	IFT88	ENSG00000032742.17	protein_coding
	0.01	1.56	VFHPRQELI	9		0.2187	Canonical	COPA	ENSG00000122218.16	protein_coding	Y
	PF		RMNPNSPSI	9		1.2514	Canonical	ERH	ENSG00000100632.11	protein_coding
	0.01	1.7	RYDSVINRL	9		0.0402	Canonical	PCF11	ENSG00000165494.11	protein_coding	Y
	0.01	2.58	VYPDGIRHI	9		0.0262	Canonical	SF3B3	ENSG00000189091.13	protein_coding	Y
	0.05	2.1	RYQEMIQKL	9		0.0031	Canonical	SCLT1	ENSG00000151466.12	protein_coding	Y
	PF		RYAEEVGIF	9		0.0369	Canonical	NANS	ENSG00000095380.11	protein_coding
	0.01	1.4	YYQKAIWEL	9		0.007	Canonical	BTNL8	ENSG00000113303.11	protein_coding	Y
	PF		NYAFLHRTL	9		0.1405	Canonical	APOBEC3B	ENSG00000179750.16	protein_coding
	PF		NYAFLHRTL	9		0.1405	Canonical	APOBEC3F	ENSG00000128394.17	protein_coding
	PF		VYTPVLEHL	9		0.004	Canonical	PRKDC	ENSG00000253729.7	protein_coding
	PF		RYALIMHKL	9	1xOxidation [M6]	0.0111	Canonical	ZBTB11	ENSG00000066422.4	protein_coding
	PF		NYIHVGAQL	9		0.1291	Canonical	MYO1D	ENSG00000176658.17	protein_coding
	0.01	2.27	VYIKHPVSL	9		0.0045	Canonical	PSMD8	ENSG00000099341.11	protein_coding	Y
	0.05	1.34	QYIDKLNAL	9		0.0749	Canonical	CCDC88C	ENSG00000015133.19	protein_coding	N
	0.01	1.93	VYISEHEHF	9		0.0015	Canonical	CLPTM1	ENSG00000104853.16	protein_coding	Y
	0.01	1.93	VYTGIDHHW	9		0.018	Canonical	DCAF13	ENSG00000164934.14	protein_coding	Y
	PF		NYMKFKAKF	9		0.0115	Canonical	CASP8AP2	ENSG00000118412.12	protein_coding
	0.01	1.93	VYTGIDHHW	9		0.018	Canonical	DCAF13P1	ENSG00000242562.1	processed_pseudogene	Y
	0.01	1.55	NYVKKFQSF	9		0.0036	Canonical	FRG1	ENSG00000109536.12	protein_coding	Y
	PF		LYVVDLKKF	9		0.0963	Canonical	UGGT1	ENSG00000136731.12	protein_coding
	PF		LYVVDLKKF	9		0.0963	Canonical	UGGT2	ENSG00000102595.20	protein_coding
	0.01	1.55	NYVKKFQSF	9		0.0036	Canonical	FRG1CP	ENSG00000282826.2	transcribed_unprocessed_pseudogene	Y
	0.01	1.55	NYVKKFQSF	9		0.0036	Canonical	FRG1BP	ENSG00000149531.15	unprocessed_pseudogene	Y
	0.01	1.55	NYVKKFQSF	9		0.0036	Canonical	FRG1JP	ENSG00000215548.2	unprocessed_pseudogene	Y
	0.01	1.55	NYVKKFQSF	9		0.0036	Canonical	FRG1KP	ENSG00000280286.1	unprocessed_pseudogene	Y
	0.01	1.64	YFKRYQVKF	9		0.0772	Canonical	RPL5	ENSG00000122406.14	protein_coding	Y
	0.01	1.64	YFKRYQVKF	9		0.0772	Canonical	RPL5P30	ENSG00000243431.1	processed_pseudogene	Y
	0.01	1.64	YFKRYQVKF	9		0.0772	Canonical	RPL5P9	ENSG00000236330.1	processed_pseudogene	Y
	PF		RQPYIWLTI	9		0.7481	Canonical	ATP8B1	ENSG00000081923.14	protein_coding
	0.01	1.64	YFKRYQVKF	9		0.0772	Canonical	RPL5P24	ENSG00000244052.1	processed_pseudogene	Y
	0.01	1.64	YFKRYQVKF	9		0.0772	Canonical	RPL5P1	ENSG00000241061.3	processed_pseudogene	Y
	0.01	1.64	YFKRYQVKF	9		0.0772	Canonical	RPL5P18	ENSG00000220744.1	processed_pseudogene	Y
	PF		VYVKHNISF	9		0.0039	Canonical	AP3M2	ENSG00000070718.12	protein_coding
	0.01	1.64	VYVKHSISF	9		0.0024	Canonical	AP3M1	ENSG00000185009.12	protein_coding	Y
	0.01	2.24	VYVYGVDRF	9		0.0174	Canonical	SLC6A19	ENSG00000174358.16	protein_coding	Y
	PF		NYTPYKYNL	9		0.0728	Canonical	HGD	ENSG00000113924.12	protein_coding
	PF		QYQQIISRL	9		0.0246	Canonical	PPP1R13L	ENSG00000104881.16	protein_coding
	0.01	2.59	RYMEVSGNL	9		0.1071	Canonical	SF3A3	ENSG00000183431.12	protein_coding	Y
	0.01	2.59	RYMEVSGNL	9		0.1071	Canonical	SF3A3P1	ENSG00000230568.1	processed_pseudogene	Y
	0.01	1.75	RYVPRASYF	9		0.0054	Canonical	CCND3	ENSG00000112576.12	protein_coding	Y
	PF		RYYGNISRF	9		0.0039	Canonical	EHMT2	ENSG00000204371.11	protein_coding
	PF		RYMDAWNTV	9		0.0683	Canonical	TIMM13	ENSG00000099800.8	protein_coding
	PF		SFKQRSDLF	9		0.2572	Canonical	ZNF394	ENSG00000160908.15	protein_coding
	0.01	1.93	YYALRAAGF	9		0.0913	Canonical	ELOVL6	ENSG00000170522.9	protein_coding	Y
	PF	1.08	SYSDPPLKF	9		0.0042	Canonical	HNRNPF	ENSG00000169813.16	protein_coding
	PF		RQLEVLQSI	9		1.1523	Canonical	CCNB2	ENSG00000157456.8	protein_coding
	0.01	1.68	YYQDTPKQI	9		0.0342	Canonical	NOP16	ENSG00000048162.20	protein_coding	Y
	0.01	1.78	RYQTQPVTL	9		0.0114	Canonical	SVIL	ENSG00000197321.14	protein_coding	Y
	PF		RYTERVDYL	9		0.0691	Canonical	USP13	ENSG00000058056.9	protein_coding
	PF		RYMVHLLEL	9		0.0198	Canonical	HAUS2	ENSG00000137814.11	protein_coding
	PF		SLPHRRPHF	9		0.4542	Canonical	CLU	ENSG00000120885.21	protein_coding
	0.05	1.6	FYISPVNKL	9		0.0189	Canonical	AVL9	ENSG00000105778.19	protein_coding	N
	0.01	2.11	SYVKGIYSF	9		0.0021	Canonical	TTC38	ENSG00000075234.17	protein_coding	Y
	PF		SYVQTLVYI	9		0.0952	Canonical	AL669918.1	ENSG00000250264.1	protein_coding
	PF		SYVQTLVYI	9		0.0952	Canonical	TAP2	ENSG00000204267.15	protein_coding
	0.01	2.04	FYTAYLQRL	9		0.1263	Canonical	QSOX1	ENSG00000116260.17	protein_coding	Y
	0.05	1.78	KYFDNSQSL	9		0.0153	Canonical	TTC17	ENSG00000052841.15	protein_coding	Y
	PF		VAIRIYHQF	9		0.295	Canonical	MYO5C	ENSG00000128833.13	protein_coding
	PF		YYRGNYMTF	9		0.0053	Canonical	ABCF1	ENSG00000204574.13	protein_coding
	0.05	1.66	SYVNHLYVI	9		0.0424	Canonical	RAPGEF5	ENSG00000136237.19	protein_coding	Y
	PF		RYQRLYVKF	9		0.0042	Canonical	PRR12	ENSG00000126464.14	protein_coding
	PF		KYGDFNKEV	9		0.7308	Canonical	MSN	ENSG00000147065.17	protein_coding
	PF		KYGDILHVI	9		0.0113	Canonical	DLG2	ENSG00000150672.17	protein_coding
	0.01	1.79	SYLHEPAVL	9		0.1034	Canonical	MYO5A	ENSG00000197535.14	protein_coding	Y
	0.01	1.79	SYLHEPAVL	9		0.1034	Canonical	MYO5B	ENSG00000167306.20	protein_coding	Y
	0.01	1.79	SYLHEPAVL	9		0.1034	Canonical	MYO5C	ENSG00000128833.13	protein_coding	Y
	0.05	1.12	SYLKHSKAF	9		0.044	Canonical	HES5	ENSG00000197921.6	protein_coding	Y
	PF		KYLKEVLRI	9		0.0137	Canonical	CHKA	ENSG00000110721.12	protein_coding
	0.05	1.75	KYIQGLKRL	9		0.0671	Canonical	PRPF18	ENSG00000165630.14	protein_coding	Y
	0.01	1.57	HYTQKSLSL	9		0.1738	Canonical	IGHGP	ENSG00000253755.1	IG_C_pseudogene	Y
	PF		LYTEAIKFF	9		0.0182	Canonical	CLEC16A	ENSG00000038532.16	protein_coding
	PF		TGPTRFFLF	9		0.4881	Canonical	GPRC5A	ENSG00000013588.8	protein_coding
	PF		VYIKHLRDI	9		0.1681	Canonical	SPATA13	ENSG00000182957.16	protein_coding
	0.01	1.57	HYTQKSLSL	9		0.1738	Canonical	IGHG1	ENSG00000211896.7	IG_C_gene	Y
	PF		VYIKHLRDI	9		0.1681	Canonical	AL359736.1	ENSG00000273167.1	protein_coding
	0.01	1.57	HYTQKSLSL	9		0.1738	Canonical	IGHG4	ENSG00000211892.4	IG_C_gene	Y
	0.01	1.57	HYTQKSLSL	9		0.1738	Canonical	IGHG2	ENSG00000211893.4	IG_C_gene	Y
	0.05	1.78	KFSPRPLKF	9		0.016	Canonical	BRWD1	ENSG00000185658.13	protein_coding	Y
	0.05	1.73	KFYTDPSYF	9		0.0649	Canonical	WASF3	ENSG00000132970.13	protein_coding	Y
	0.05	1.73	KFYTDPSYF	9		0.0649	Canonical	WASF2	ENSG00000158195.11	protein_coding	Y
	0.01	2.33	KYGDPGSLF	9		0.0082	Canonical	ITGA6	ENSG00000091409.15	protein_coding	Y
	PF		KYLESVKPF	9		0.022	Canonical	CROT	ENSG00000005469.11	protein_coding
	0.01	1.91	YYSPHGHIL	9		0.0196	Canonical	EIF2A	ENSG00000144895.12	protein_coding	Y
	0.01	2.13	EYGVIRDVL	9		0.9361	Canonical	H6PD	ENSG00000049239.12	protein_coding	Y
	PF		KYLLDSPSL	9		0.0916	Canonical	SLC35C1	ENSG00000181830.8	protein_coding
	0.01	2.34	HYLDTTTLI	9		0.0446	Canonical	CRK	ENSG00000167193.8	protein_coding	Y
	0.01	2.34	HYLDTTTLI	9		0.0446	Canonical	CRKL	ENSG00000099942.13	protein_coding	Y
	PF		HYLNHWNHF	9		0.0043	Canonical	FN3KRP	ENSG00000141560.15	protein_coding
	0.01	2.12	EYLLKVNEI	9		0.151	Canonical	ASAP1	ENSG00000153317.15	protein_coding	Y
	0.01	2.31	KYIDKTIRV	9		0.0699	Canonical	LSM7	ENSG00000130332.15	protein_coding	Y
	0.01	2.12	EYLLKVNEI	9		0.151	Canonical	ASAP2	ENSG00000151693.11	protein_coding	Y
	0.05	1.61	EYTAKIALL	9		0.1702	Canonical	EZR	ENSG00000092820.18	protein_coding	Y
	0.01	2.72	KYLEETNSL	9		0.0173	Canonical	L3MBTL3	ENSG00000198945.7	protein_coding	Y
	0.01	1.61	YYHKVVIRL	9		0.0137	Canonical	EP400	ENSG00000183495.13	protein_coding	Y
	0.01	1.88	HYANIGKTL	9		0.1522	Canonical	RMDN2	ENSG00000115841.20	protein_coding	Y
	0.05	2.16	KYHIVKQIF	9		0.0266	Canonical	HERC3	ENSG00000138641.18	protein_coding	Y
	0.05	2.16	KYHIVKQIF	9		0.0266	Canonical	AC098582.1	ENSG00000287542.1	protein_coding	Y
	PF		WAPKPYHKF	9		0.3891	Canonical	TNIK	ENSG00000154310.17	protein_coding
	PF		WAPKPYHKF	9		0.3891	Canonical	MINK1	ENSG00000141503.17	protein_coding
	PF		KFVETHPEF	9		0.0194	Canonical	ADA2	ENSG00000093072.18	protein_coding
	PF		WAPKPYHKF	9		0.3891	Canonical	MAP4K4	ENSG00000071054.16	protein_coding
	PF		FYIHHPVHL	9		0.015	Canonical	ALMS1	ENSG00000116127.18	protein_coding
	PF		AYRRIFQKF	9		0.0178	Canonical	MYO1E	ENSG00000157483.8	protein_coding
	PF		LLPNHSYVF	9		0.2136	Canonical	ITGB4	ENSG00000132470.14	protein_coding
	PF		KYPLLLKEL	9		0.0749	Canonical	TIAM2	ENSG00000146426.18	protein_coding
	PF		VYRVYVATF	9		0.039	Canonical	ENTPD4	ENSG00000197217.13	protein_coding
	PF		KYPLLLKEL	9		0.0749	Canonical	PREX1	ENSG00000124126.14	protein_coding
	PF		VYSPKSPSL	9		0.0138	Canonical	MGRN1	ENSG00000102858.13	protein_coding
	PF		KYPLLLKEL	9		0.0749	Canonical	PREX2	ENSG00000046889.19	protein_coding
	PF		KYPLLLKEL	9		0.0749	Canonical	NET1	ENSG00000173848.19	protein_coding
	0.05	2.51	KYQAVTATL	9		0.011	Canonical	RPL13A	ENSG00000142541.17	protein_coding	Y
	PF		KYLDIPKML	9		0.0245	Canonical	ACTN3	ENSG00000248746.6	protein_coding
	0.01	2.38	LYDPVISKL	9		0.0397	Canonical	MCRS1	ENSG00000187778.14	protein_coding	Y
	0.05	2.51	KYQAVTATL	9		0.011	Canonical	RPL13AP5	ENSG00000236552.2	processed_pseudogene	Y
	PF		KYLDIPKML	9		0.0245	Canonical	ACTN1	ENSG00000072110.13	protein_coding
	PF		KYLDIPKML	9		0.0245	Canonical	ACTN4	ENSG00000130402.12	protein_coding
	0.05	2.51	KYQAVTATL	9		0.011	Canonical	RPL13AP25	ENSG00000136149.6	processed_pseudogene	Y
	PF		IYEPLHTHW	9		0.0168	Canonical	PAQR7	ENSG00000182749.5	protein_coding
	PF		AYLVAHSFL	9		0.1774	Canonical	SLC44A3	ENSG00000143036.17	protein_coding
	0.05	2.51	KYQAVTATL	9		0.011	Canonical	RPL13AP20	ENSG00000234498.3	processed_pseudogene	Y
	0.05	2.51	KYQAVTATL	9		0.011	Canonical	AC125807.1	ENSG00000234589.4	processed_pseudogene	Y
	PF		AYNPVTHQL	9		0.0072	Canonical	CDON	ENSG00000064309.14	protein_coding
	PF		RYVDRVTEF	9		0.003	Canonical	CDK5RAP3	ENSG00000108465.15	protein_coding
	0.05	2.51	KYQAVTATL	9		0.011	Canonical	RPL13AP	ENSG00000231301.1	processed_pseudogene	Y
	PF		RYVDRVTEF	9		0.003	Canonical	AC018521.1	ENSG00000263798.2	lncRNA
	PF		RYVDRVTEF	9		0.003	Canonical	AL121723.1	ENSG00000224628.2	processed_pseudogene
	0.05	2.51	KYQAVTATL	9		0.011	Canonical	RPL13AP3	ENSG00000177350.6	transcribed_processed_pseudogene	Y
	PF		RYLHKPYLI	9		0.0075	Canonical	TTLL4	ENSG00000135912.11	protein_coding
	PF		TMLGKFYHF	9		0.0798	Canonical	IFT122	ENSG00000163913.11	protein_coding
	0.01	2.25	RYVQQLQRL	9		0.0175	Canonical	MRPL43	ENSG00000055950.16	protein_coding	Y
	PF		EYLSTCSKL	9		0.3083	Canonical	ARID2	ENSG00000189079.17	protein_coding
	0.05	2.51	KYQAVTATL	9		0.011	Canonical	AC018523.1	ENSG00000255074.1	processed_pseudogene	Y
	0.05	2.51	KYQAVTATL	9		0.011	Canonical	RPL13AP19	ENSG00000228754.1	processed_pseudogene	Y
	PF		SYQPNENKF	9		0.0057	Canonical	FAM83B	ENSG00000168143.9	protein_coding
	0.05	2.51	KYQAVTATL	9		0.011	Canonical	AC104212.2	ENSG00000241746.1	processed_pseudogene	Y
	0.01	2.23	RYNPENNTW	9		0.0171	Canonical	IVNS1ABP	ENSG00000116679.16	protein_coding	Y
	PF		RYIHKLYDL	9		0.0667	Canonical	DOCK4	ENSG00000128512.22	protein_coding
	PF		EYLDRAEKL	9		0.1789	Canonical	VPS4B	ENSG00000119541.10	protein_coding
	PF		RYLHLAAKL	9		0.068	Canonical	DHX29	ENSG00000067248.10	protein_coding
	PF		EYIKGFQKL	9		0.0163	Canonical	DDX52	ENSG00000278053.5	protein_coding
	PF		LYMRIRDNW	9		0.1044	Canonical	SPTLC2	ENSG00000100596.6	protein_coding
	PF		LYMRIRDNW	9		0.1044	Canonical	SPTLC3	ENSG00000172296.13	protein_coding
	PF		KYPNVDARL	9		0.1143	Canonical	UGCG	ENSG00000148154.10	protein_coding
	PF		KYVEKLEAL	9		0.0601	Canonical	PRUNE1	ENSG00000143363.17	protein_coding
	PF		LYSSESHRF	9		0.0081	Canonical	MTMR6	ENSG00000139505.11	protein_coding
	0.05	1.11	FYQPKIQQF	9		0.0013	Canonical	FANCI	ENSG00000140525.17	protein_coding	Y
	PF		EYVSQHLVF	9		0.0353	Canonical	STRIP2	ENSG00000128578.10	protein_coding
	PF		TYTSRLAII	9		0.2703	Canonical	PAN2	ENSG00000135473.15	protein_coding
	PF		IYSVNKEQL	9		0.1199	Canonical	XIAP	ENSG00000101966.12	protein_coding
	PF		IYSVNKEQL	9		0.1199	Canonical	XIAPP3	ENSG00000180152.3	processed_pseudogene
	PF		SYLTLHKRI	9		0.1538	Canonical	ZNF558	ENSG00000167785.9	protein_coding
	PF		SYLTLHKRI	9		0.1538	Canonical	AL390728.4	ENSG00000227671.4	transcribed_unprocessed_pseudogene
	PF		SYLTLHKRI	9		0.1538	Canonical	AC010329.5	ENSG00000280171.1	unprocessed_pseudogene
	PF		SYLTLHKRI	9		0.1538	Canonical	AC010329.2	ENSG00000269779.1	unprocessed_pseudogene
	0.01	2.44	LYQRAFQHL	9		0.0101	Canonical	PRKDC	ENSG00000253729.7	protein_coding	Y
	PF		KYTEKLEEI	9		0.0509	Canonical	CEP41	ENSG00000106477.19	protein_coding
	0.01	2.25	RYAWIKRQL	9		0.1506	Canonical	VPS53	ENSG00000141252.20	protein_coding	Y
	PF		EYGQVNHAL	9		0.2469	Canonical	TUBGCP2	ENSG00000130640.13	protein_coding
	PF		RYTNRVVTL	9		0.0165	Canonical	CDK9	ENSG00000136807.13	protein_coding
	PF		IYIRYLYKL	9		0.0151	Canonical	DOCK5	ENSG00000147459.18	protein_coding
	PF		YYSNLHQTF	9		0.0015	Canonical	METTL18	ENSG00000171806.12	protein_coding
	PF		FFKDRHWLF	9		0.0655	Canonical	METTL2A	ENSG00000087995.15	protein_coding
	PF		FFKDRHWLF	9		0.0655	Canonical	METTL2B	ENSG00000165055.15	protein_coding
	0.01	2.39	SYLIIHQRI	9		0.0195	Canonical	ZNF852	ENSG00000178917.16	protein_coding
	PF		PFSGKSFYL	9		0.5757	Canonical	DBF4B	ENSG00000161692.18	protein_coding
	0.01	2.39	SYLIIHQRI	9		0.0195	Canonical	ZNF397	ENSG00000186812.13	protein_coding
	PF		IYNLKNPTL	9		0.0325	Canonical	CMBL	ENSG00000164237.9	protein_coding
	0.01	2.39	SYLIIHQRI	9		0.0195	Canonical	ZNF35	ENSG00000169981.11	protein_coding
	PF		IYSEMIHNL	9		0.0038	Canonical	FAM135A	ENSG00000082269.16	protein_coding
	PF		LYKDVRDLL	9		0.1634	Canonical	ANKZF1	ENSG00000163516.13	protein_coding
	0.01	2.39	SYLIIHQRI	9		0.0195	Canonical	ZNF230	ENSG00000159882.13	protein_coding
	0.01	2.39	SYLIIHQRI	9		0.0195	Canonical	AC093225.1	ENSG00000250860.1	processed_pseudogene
	PF		TFISPQQRW	9		0.1284	Canonical	MGP	ENSG00000111341.9	protein_coding
	0.01	1.93	KYPDVIQEL	9		0.0037	Canonical	CNNM4	ENSG00000158158.12	protein_coding	Y
	0.01	2.65	LYFDRKYLF	9		0.0041	Canonical	GLDN	ENSG00000186417.14	protein_coding	Y
	PF		AAAKVYSLF	9		0.7813	Canonical	LTBP2	ENSG00000119681.12	protein_coding
	PF		LYTPEHHLI	9		0.0137	Canonical	TTI2	ENSG00000129696.12	protein_coding
	0.01	1.73	LYINKANIW	9		0.1042	Canonical	G2E3	ENSG00000092140.16	protein_coding	Y
	PF		YYLDHSILL	9		0.0158	Canonical	SLC41A2	ENSG00000136052.9	protein_coding
	PF		EYLHNCSYF	9		0.083	Canonical	AHCTF1	ENSG00000153207.15	protein_coding
	PF		EYLHNCSYF	9		0.083	Canonical	AC009487.2	ENSG00000226121.2	processed_pseudogene
	PF		KYDAAHFLI	9		0.0902	Canonical	ORMDL2	ENSG00000123353.10	protein_coding
	PF		VYVDKLAEL	9		0.0201	Canonical	HSPA4	ENSG00000170606.15	protein_coding
	0.01	2.13	IYKSMVQKF	9		0.003	Canonical	MYO1A	ENSG00000166866.13	protein_coding	Y
	PF		RHQEMFHYF	9		0.1457	Canonical	TRIM31	ENSG00000204616.11	protein_coding
	0.05	1.09	QYSQHISLF	9		0.0067	Canonical	NOSTRIN	ENSG00000163072.15	protein_coding	Y
	0.01	1.92	IYHPNVDKL	9		0.0092	Canonical	UBE2N	ENSG00000177889.10	protein_coding	Y
	PF		AFIEKHWTF	9		0.0049	Canonical	KAT14	ENSG00000149474.13	protein_coding
	PF		SYLIQAEKI	9		0.0845	Canonical	STIM2	ENSG00000109689.16	protein_coding
	0.01	1.92	IYHPNVDKL	9		0.0092	Canonical	AC024451.3	ENSG00000254065.1	processed_pseudogene	Y
	0.01	1.92	IYHPNVDKL	9		0.0092	Canonical	UBE2NL	ENSG00000276380.2	polymorphic_pseudogene	Y
	PF		QYKGMFDTL	9		0.0671	Canonical	SLC25A32	ENSG00000164933.12	protein_coding
	0.01	1.92	IYHPNVDKL	9		0.0092	Canonical	UBE2NP1	ENSG00000256385.1	processed_pseudogene	Y
	PF		QYKGMFDTL	9		0.0671	Canonical	AC012213.5	ENSG00000285982.1	protein_coding
	0.05	1.13	EYMAQHLVF	9	1xOxidation [M3]	0.0234	Canonical	STRIP1	ENSG00000143093.15	protein_coding	N
	PF		SYELRYFQI	9		0.2125	Canonical	RPL22	ENSG00000116251.11	protein_coding
	PF		SYELRYFQI	9		0.2125	Canonical	RPL22P1	ENSG00000213178.3	processed_pseudogene
	PF		SYELRYFQI	9		0.2125	Canonical	RPL22P19	ENSG00000241129.3	transcribed_processed_pseudogene
	PF		VYPVITARL	9		0.0213	Canonical	ZNF106	ENSG00000103994.17	protein_coding
	0.05	1.39	LYSEVSHLL	9		0.0121	Canonical	RICTOR	ENSG00000164327.13	protein_coding	Y
	PF		VFHDQLHTF	9		0.0049	Canonical	RPS6KA5	ENSG00000100784.12	protein_coding
	PF		HYHPIVQRF	9		0.0018	Canonical	NOC3L	ENSG00000173145.11	protein_coding
	PF		KQLAVYEEF	9		0.3738	Canonical	CNOT1	ENSG00000125107.18	protein_coding
	PF		QYASLMHSF	9		0.004	Canonical	DYNLRB1	ENSG00000125971.16	protein_coding
	PF		QYASLMHSF	9		0.004	Canonical	ITCH	ENSG00000078747.15	protein_coding
	PF		AFIQKSNLI	9		0.4932	Canonical	ZNF146	ENSG00000167635.11	protein_coding
	0.01	1.58	IFSNVRINL	9		0.4091	Canonical	CAV1	ENSG00000105974.12	protein_coding	Y
	PF		IYNGKVTSI	9		0.0353	Canonical	DHX8	ENSG00000067596.11	protein_coding
	PF		RYAIKILAI	9		0.0934	Canonical	TTC12	ENSG00000149292.16	protein_coding
	PF		AYLKAIVLF	9		0.0052	Canonical	NR2C2	ENSG00000177463.15	protein_coding
	PF		AYLKAIVLF	9		0.0052	Canonical	NR2C1	ENSG00000120798.17	protein_coding
	PF		VYITGKEVF	9		0.0159	Canonical	VPS13A	ENSG00000197969.14	protein_coding
	0.01	1.95	IYPSKWIARL	10		0.1424	Canonical	TSC2	ENSG00000103197.18	protein_coding	Y
	PF		RYFDGNLEKL	10		0.1037	Canonical	ARIH1	ENSG00000166233.15	protein_coding
	PF		IYGESISSHF	10		0.0138	Canonical	R3HCC1L	ENSG00000166024.13	protein_coding
	PF		KYAELRDTI	9		0.0834	Canonical	MYO6	ENSG00000196586.15	protein_coding
	PF		EYVRVSEHF	9		0.0168	Canonical	ZC3HAV1	ENSG00000105939.13	protein_coding
	0.01	2.64	VYEVPVETKF	10		0.0197	Canonical	SLC26A3	ENSG00000091138.12	protein_coding	Y
	PF		AYHNSPAYL	9		0.1501	Canonical	SMARCE1	ENSG00000073584.20	protein_coding
	PF		AYHNSPAYL	9		0.1501	Canonical	AC073508.2	ENSG00000264058.2	protein_coding
	PF		RYGLLTNEI	9		0.1363	Canonical	DHX58	ENSG00000108771.13	protein_coding
	PF		KYIQKPGLL	9		0.0721	Canonical	PAQR7	ENSG00000182749.5	protein_coding
	PF		IYKHFSATL	9		0.0484	Canonical	DOCK5	ENSG00000147459.18	protein_coding
	PF		SYLAIHQRI	9		0.0141	Canonical	ZNF665	ENSG00000197497.11	protein_coding
	PF		NYVANTNVF	9		0.0529	Canonical	PREX1	ENSG00000124126.14	protein_coding
	PF		AFLVLHSRF	9		0.2231	Canonical	NHLRC3	ENSG00000188811.14	protein_coding
	PF		TYVKRLHLL	9		0.0079	Canonical	FGD3	ENSG00000127084.19	protein_coding
	PF		EYCLKFTKL	9		0.2101	Canonical	SUPT7L	ENSG00000119760.16	protein_coding
	PF	1.16	VYLKTALGL	9		0.1036	Canonical	KLHL23	ENSG00000213160.10	protein_coding
	0.01	1.72	AYMPQSRNL	9		0.0509	Canonical	AC009163.2	ENSG00000260092.1	protein_coding	Y
	0.05	1.17	YGSGHYITF	9		0.4981	Canonical	MUC2	ENSG00000198788.8	protein_coding	Y
	0.01	1.72	AYMPQSRNL	9		0.0509	Canonical	CHST5	ENSG00000135702.14	protein_coding	Y
	PF		RYLTVAAIF	9		0.0213	Canonical	TUBB2B	ENSG00000137285.10	protein_coding
	PF		RYLTVAAIF	9		0.0213	Canonical	TUBB2A	ENSG00000137267.6	protein_coding
	PF		RYLTVAAIF	9		0.0213	Canonical	TUBB8P7	ENSG00000261812.6	transcribed_unprocessed_pseudogene
	PF		TYAKGFGML	9		0.166	Canonical	UBE3A	ENSG00000114062.20	protein_coding
	PF		VYSRDPNYL	9		0.0572	Canonical	UBE3A	ENSG00000114062.20	protein_coding
	PF		TYISKTIAL	9		0.0427	Canonical	EXOC3L2	ENSG00000283632.2	protein_coding
	PF		KFHPSIQSF	9		0.0113	Canonical	MUL1	ENSG00000090432.7	protein_coding
	PF		KWLEKNLPTL	10		0.4161	Canonical	ERAP2	ENSG00000164308.16	protein_coding
	0.05	1.38	EYAKIFTTY	9		0.1445	Canonical	LPCAT2	ENSG00000087253.13	protein_coding	Y
	0.01	2.12	MWKEGNRIHF	10		0.2743	Canonical	HSD17B4	ENSG00000133835.16	protein_coding	Y
	0.01	2.12	MWKEGNRIHF	10		0.2743	Canonical	AC018992.1	ENSG00000253336.1	processed_pseudogene	Y
	PF		YYSHLEGARF	10		0.0982	Canonical	URB1	ENSG00000142207.7	protein_coding
	0.01	1.6	HYMPPPYASL	10		0.0444	Canonical	RNF111	ENSG00000157450.15	protein_coding	Y
	0.01	2.09	IYADNQVMHF	10		0.0049	Canonical	POLE	ENSG00000177084.16	protein_coding	Y
	PF		HYDGSYSTF	9		0.0214	Canonical	A2M	ENSG00000175899.14	protein_coding
	0.01	1.71	VQPGQNFHMF	10		0.319	Canonical	PSMA5	ENSG00000143106.13	protein_coding	Y
	PF		QYLKMLQKL	9		0.015	Canonical	NRDC	ENSG00000078618.21	protein_coding
	PF		KYVEVFHKI	9		0.002	Canonical	ZNF117	ENSG00000152926.14	protein_coding
	PF		NYKDLNGNVF	10		0.2807	Canonical	SSR1	ENSG00000124783.14	protein_coding
	0.01	1.76	VMSQALKATF	10	1xOxidation [M2]	1.5148	Canonical	ETS2	ENSG00000157557.13	protein_coding	Y
	0.01	2.59	SYMLVNENRF	10		0.0604	Canonical	LDOC1	ENSG00000182195.8	protein_coding	Y
	PF		KYMTAVVKLF	10		0.0196	Canonical	CYBA	ENSG00000051523.11	protein_coding
	0.01	1.47	RYKGPGFEYF	10		0.0112	Canonical	RPUSD2	ENSG00000166133.18	protein_coding	Y
	PF	1.42	VFHPSQDLVF	10		0.1296	Canonical	PRPF19	ENSG00000110107.9	protein_coding
	PF		DYLHMVHRL	9		0.0653	Canonical	NIPBL	ENSG00000164190.19	protein_coding
	PF		LYNKITSRL	9		0.0519	Canonical	CLP1	ENSG00000172409.6	protein_coding
	0.01	1.99	VYQPPLRGQF	10		0.0158	Canonical	ENTPD8	ENSG00000188833.9	protein_coding	Y
	0.01	1.44	KYKDQPQQTF	10		0.0211	Canonical	STAB1	ENSG00000010327.10	protein_coding	Y
	PF		AYARIGNSYF	10		0.0995	Canonical	STIP1	ENSG00000168439.16	protein_coding
	PF		RYAEEVGIFF	10		0.0168	Canonical	NANS	ENSG00000095380.11	protein_coding
	PF		VYKETCISF	9		0.0119	Canonical	TSPAN8	ENSG00000127324.9	protein_coding
	0.01	2.8	KYQEVTNNLEF	11		0.0151	Canonical	CAPRIN1	ENSG00000135387.21	protein_coding	Y
	PF		AFHRPPYHLL	10		0.5882	Canonical	EDC4	ENSG00000038358.15	protein_coding
	PF		AYNPMARDLF	10		0.0742	Canonical	MTOR	ENSG00000198793.12	protein_coding
	PF		AYLTLTSRM	9	1xOxidation [M9]	0.2692	Canonical	RIF1	ENSG00000080345.17	protein_coding
	0.01	2.52	VYSQIPAAVKL	11		0.0904	Canonical	UBR5	ENSG00000104517.13	protein_coding	Y
	PF		HYGPGWVSM	9		0.091	Canonical	PPIB	ENSG00000166794.4	protein_coding
	PF		RYKPGEPITF	10		0.0081	Canonical	DENND1B	ENSG00000213047.13	protein_coding
	PF		IYSSKPLHI	9		0.0144	Canonical	PCNX4	ENSG00000126773.13	protein_coding
	0.01	3.15	VYEDLRGSVTF	11		0.0219	Canonical	PIGR	ENSG00000162896.6	protein_coding	Y
	0.05	1.25	SYSDLHYGF	9		0.0094	Canonical	CAPN13	ENSG00000162949.16	protein_coding	Y
	PF		SYNPAENAVLL	11		0.1953	Canonical	COPA	ENSG00000122218.16	protein_coding
	PF		KYSDVSGLL	9		0.1141	Canonical	INO80C	ENSG00000153391.15	protein_coding
	PF		DYLKNTYRL	9		0.0436	Canonical	DPP4	ENSG00000197635.10	protein_coding
	0.05	1.18	GFEDDVVIEF	10		1.0032	Canonical	SRRM1	ENSG00000133226.17	protein_coding	Y
	0.05	1.18	GFEDDVVIEF	10		1.0032	Canonical	SRRM1P3	ENSG00000237307.2	processed_pseudogene	Y
	PF		LYIGWDKHYGF	11		0.1634	Canonical	PSMA4	ENSG00000041357.16	protein_coding
	PF		VYFSAAHAL	9		0.036	Canonical	ORC3	ENSG00000135336.14	protein_coding
	0.01	2.87	KYMDVVKERI	10		0.1797	Canonical	DDX24	ENSG00000089737.17	protein_coding	Y
	0.01	1.49	AFKKLNNLTF	10		0.4656	Canonical	OGN	ENSG00000106809.11	protein_coding	Y
	0.01	2.13	LYRGSTSTF	9		0.0918	Canonical	ITGB6	ENSG00000115221.12	protein_coding	Y
	PF		KYPVHIYRL	9		0.0069	Canonical	RAD54B	ENSG00000197275.14	protein_coding
	PF		KYPVHIYRL	9		0.0069	Canonical	FSBP	ENSG00000265817.3	protein_coding
	PF		YYLTPDGQRF	10		0.0117	Canonical	CYP4F11	ENSG00000171903.16	protein_coding
	PF		YYLTPDGQRF	10		0.0117	Canonical	CYP4F3	ENSG00000186529.16	protein_coding
	PF		IFKDKPIKL	9		0.1897	Canonical	SH3KBP1	ENSG00000147010.18	protein_coding
	PF		VYKDSFELKF	10		0.0119	Canonical	CUL4A	ENSG00000139842.15	protein_coding
	PF		YYLTPDGQRF	10		0.0117	Canonical	CYP4F2	ENSG00000186115.13	protein_coding
	PF		KFLDAGHKLNF	11		0.1022	Canonical	PDIA3	ENSG00000167004.13	protein_coding
	PF		KFLDAGHKLNF	11		0.1022	Canonical	PDIA3P1	ENSG00000180867.11	transcribed_processed_pseudogene
	0.05	1.2	VYGFPVNQL	9		0.0437	Canonical	EXOC6B	ENSG00000144036.15	protein_coding	Y
	PF		SYIEVSHGLG	10		1.9257	Canonical	SYNPO2	ENSG00000172403.11	protein_coding
	PF		VYCLRTEYI	9		0.2144	Canonical	TOPBP1	ENSG00000163781.13	protein_coding
	PF		EFPPGTPRF	9		0.0438	Canonical	PRKDC	ENSG00000253729.7	protein_coding
	PF		RYMNHMQSLRF	11		0.0455	Canonical	ARIH1	ENSG00000166233.15	protein_coding
	PF		TYMDAQLFKKV	11		0.9284	Canonical	RGL1	ENSG00000143344.15	protein_coding
	PF		KFMGVQMETF	10		0.1258	Canonical	IQGAP1	ENSG00000140575.13	protein_coding
	PF		KMPKMKMPKF	10		0.4883	Canonical	AHNAK	ENSG00000124942.14	protein_coding
	PF		KMPKVKMPKF	10		0.3826	Canonical	AHNAK	ENSG00000124942.14	protein_coding
	PF		KYVDLTVSF	9		0.0028	Canonical	UBA6	ENSG00000033178.13	protein_coding
	PF		RGTYLPQTYII	11		0.332	Canonical	ITM2C	ENSG00000135916.16	protein_coding
	PF		IYINSRSVFL	10		0.2885	Canonical	CAPN5	ENSG00000149260.18	protein_coding
	PF		LYSSNSANEVF	11		0.1867	Canonical	ST6GALNAC6	ENSG00000160408.14	protein_coding
	PF		VHADRNTFHRF	11		0.7376	Canonical	AMPD2	ENSG00000116337.17	protein_coding
	PF		LYSSNSANEVF	11		0.1867	Canonical	AL157935.2	ENSG00000257524.6	protein_coding
	PF		AYPARPAQL	9		0.1143	Canonical	LEMD2	ENSG00000161904.12	protein_coding
	PF		RYGGPLGITI	10		0.1693	Canonical	GRIP2	ENSG00000144596.13	protein_coding
	PF		RYGGPLGITI	10		0.1693	Canonical	GRIP1	ENSG00000155974.12	protein_coding
	PF		KYLREFQLTL	10		0.0826	Canonical	C16orf89	ENSG00000153446.15	protein_coding
	0.01	1.98	MYEENSRDNPF	11		0.7424	Canonical	SCG2	ENSG00000171951.5	protein_coding	Y
	PF		LYNPKITSEL	10		0.2143	Canonical	RIF1	ENSG00000080345.17	protein_coding
	PF		IYRGAGGSF	9		0.3031	Canonical	SCAMP4	ENSG00000227500.10	protein_coding
	PF		KYNGEPVQI	9		0.0822	Canonical	VIL1	ENSG00000127831.10	protein_coding
	0.01	1.71	KYLDELGFTVF	11		0.0248	Canonical	HSD17B2	ENSG00000086696.11	protein_coding	Y
	PF		IYREFREEESL	11		0.9241	Canonical	PRKDC	ENSG00000253729.7	protein_coding
	PF		VFVNTHHIL	9		0.2288	Canonical	B3GNT2	ENSG00000170340.11	protein_coding
	PF		IYIKHPHLFKY	11		0.2829	Canonical	DNTTIP1	ENSG00000101457.13	protein_coding
	PF		TYGGSWKF	8		0.1733	Canonical	AIG1	ENSG00000146416.18	protein_coding
	PF		PFAKPLPTF	9		0.0309	Canonical	EP400	ENSG00000183495.13	protein_coding
	PF		TYLVDMRRF	9		0.044	Canonical	FZD1	ENSG00000157240.3	protein_coding
	PF		TYLVDMRRF	9		0.044	Canonical	FZD7	ENSG00000155760.2	protein_coding
	0.05	1.11	TYAPVKSFL	9		0.0292	Canonical	ST3GAL2	ENSG00000157350.13	protein_coding	Y
	PF		KYTNWKAFL	9		0.2057	Canonical	MBTD1	ENSG00000011258.16	protein_coding
	0.05	1.83	RYAKIVEI	8		0.3994	Canonical	ATP1A1	ENSG00000163399.16	protein_coding	Y
	PF		IYGSVDRVI	9		0.2285	Canonical	VIRMA	ENSG00000164944.12	protein_coding
	PF		VYTHSYLCF	9		0.0165	Canonical	ENTPD8	ENSG00000188833.9	protein_coding
	0.01	1.51	VYSPLGSAYKL	11		0.0931	Canonical	SLC38A9	ENSG00000177058.12	protein_coding	Y
	PF		VYIAGQQAF	9		0.0066	Canonical	HNRNPLL	ENSG00000143889.16	protein_coding
	0.05	1.21	YYLGNPAEF	9		0.0031	Canonical	RCN1	ENSG00000049449.9	protein_coding	Y
	PF		VYMPASSYQSL	11		0.0352	Canonical	FAM126B	ENSG00000155744.9	protein_coding
	PF		VYIHHFDSI	9		0.0254	Canonical	MOB3C	ENSG00000142961.14	protein_coding
	PF		KYPASTVQI	9		0.0346	Canonical	NOP56	ENSG00000101361.17	protein_coding
	PF		IGAEVYHNL	9		1.4917	Canonical	ENO1	ENSG00000074800.16	protein_coding
	0.05	1.21	YYLGNPAEF	9		0.0031	Canonical	AL035078.4	ENSG00000285283.1	protein_coding	Y
	0.05	1.45	QYLTSVQQL	9		0.0172	Canonical	CEP97	ENSG00000182504.11	protein_coding	Y
	PF		AYIRKHVQL	9		0.0611	Canonical	DDC	ENSG00000132437.18	protein_coding
	PF		MYINEVERL	9		0.0253	Canonical	PTPN14	ENSG00000152104.12	protein_coding
	PF		VFKTTLNEF	9		0.0806	Canonical	RIOK3	ENSG00000101782.15	protein_coding
	PF		KYLAEKYLQKL	11		0.2763	Canonical	RAB23	ENSG00000112210.12	protein_coding
	PF		KYISKPENLKL	11		0.116	Canonical	CAB39	ENSG00000135932.11	protein_coding
	PF		KYISKPENLKL	11		0.116	Canonical	CAB39L	ENSG00000102547.19	protein_coding
	PF		KYLEESTIRHF	11		0.0183	Canonical	AMOTL1	ENSG00000166025.18	protein_coding
	PF		VYPARTQTL	9		0.015	Canonical	HLA-DRB5	ENSG00000198502.6	protein_coding
	PF		IYGGSDSRF	9		0.0759	Canonical	SF3B1	ENSG00000115524.16	protein_coding
	PF		KLPEKTQTF	9		0.0295	Canonical	INTS14	ENSG00000138614.15	protein_coding
	PF	1.21	EYSKNWFTV	9		0.2072	Canonical	TRPM6	ENSG00000119121.22	protein_coding
	PF		VYVGAVNRI	9		0.0395	Canonical	PLXNA1	ENSG00000114554.11	protein_coding
	PF		LYAKIAEAF	9		0.0153	Canonical	GIPC3	ENSG00000179855.8	protein_coding
	0.01	1.69	LYSEVDVHF	9		0.0083	Canonical	POGZ	ENSG00000143442.22	protein_coding	Y
	PF		RFQEKFFIF	9		0.0157	Canonical	PIAS2	ENSG00000078043.16	protein_coding
	PF		KYREMYEEF	9		0.0083	Canonical	MTREX	ENSG00000039123.16	protein_coding
	PF		QFPVGRVHRLL	11		1.9463	Canonical	AL031777.3	ENSG00000282988.2	protein_coding
	PF		QFPVGRVHRLL	11		1.9463	Canonical	H2AFX	ENSG00000188486.3	protein_coding
	0.01	2.08	YVSRPSHF	8		0.9472	Canonical	STAT2	ENSG00000170581.14	protein_coding	Y
	PF		QFPVGRVHRLL	11		1.9463	Canonical	HIST1H2AG	ENSG00000196787.3	protein_coding
	PF		HYCNKVFAL	9		0.2503	Canonical	ZBTB38	ENSG00000177311.11	protein_coding
	PF		QFPVGRVHRLL	11		1.9463	Canonical	HIST1H2AC	ENSG00000180573.9	protein_coding
	PF		KYGPIRQI	8		0.498	Canonical	SF3B6	ENSG00000115128.7	protein_coding
	PF		QFPVGRVHRLL	11		1.9463	Canonical	HIST3H2A	ENSG00000181218.5	protein_coding
	0.05	1.42	KYGFGYQL	8		0.5924	Canonical	PLK2	ENSG00000145632.15	protein_coding	Y
	0.05	1.42	KYGFGYQL	8		0.5924	Canonical	PLK5	ENSG00000185988.13	protein_coding	Y
	0.05	1.26	LYGQVQVF	8		0.3234	Canonical	NOL9	ENSG00000162408.11	protein_coding	Y
	PF		TYPNTYIF	8		0.1179	Canonical	TRPC4AP	ENSG00000100991.12	protein_coding
	0.01	1.93	YWSHPRKF	8		0.5405	Canonical	RPS29	ENSG00000213741.10	protein_coding	Y
	PF		QFPVGRVHRLL	11		1.9463	Canonical	HIST2H2AA4	ENSG00000272196.2	protein_coding
	0.01	1.93	YWSHPRKF	8		0.5405	Canonical	AL161787.1	ENSG00000219928.2	processed_pseudogene	Y
	PF		QFPVGRVHRLL	11		1.9463	Canonical	HIST2H2AA3	ENSG00000203812.2	protein_coding
	PF		QFPVGRVHRLL	11		1.9463	Canonical	HIST2H2AB	ENSG00000184270.5	protein_coding
	PF		QFPVGRVHRLL	11		1.9463	Canonical	HIST1H2AE	ENSG00000277075.2	protein_coding
	PF		GYCPNHPVI	9		0.3208	Canonical	NEDD4L	ENSG00000049759.18	protein_coding
	PF		QFPVGRVHRLL	11		1.9463	Canonical	HIST1H2AI	ENSG00000196747.4	protein_coding
	PF		QFPVGRVHRLL	11		1.9463	Canonical	HIST1H2AB	ENSG00000278463.1	protein_coding
	PF		QFPVGRVHRLL	11		1.9463	Canonical	HIST1H2AD	ENSG00000196866.2	protein_coding
	PF		QFPVGRVHRLL	11		1.9463	Canonical	HIST1H2AK	ENSG00000275221.1	protein_coding
	PF		QFPVGRVHRLL	11		1.9463	Canonical	HIST1H2AL	ENSG00000276903.1	protein_coding
	PF		QFPVGRVHRLL	11		1.9463	Canonical	HIST1H2AM	ENSG00000278677.1	protein_coding
	PF		QFPVGRVHRLL	11		1.9463	Canonical	H2AFJ	ENSG00000246705.4	protein_coding
	PF		QFPVGRVHRLL	11		1.9463	Canonical	HIST2H2AC	ENSG00000184260.5	protein_coding
	PF		QFPVGRVHRLL	11		1.9463	Canonical	HIST1H2AH	ENSG00000274997.1	protein_coding
	PF		FYIRRVHNL	9		0.0181	Canonical	NUP205	ENSG00000155561.15	protein_coding
	PF		NYNLVTENL	9		0.1175	Canonical	UBE4A	ENSG00000110344.9	protein_coding
	PF		QFPVGRVHRLL	11		1.9463	Canonical	HIST1H2AJ	ENSG00000276368.1	protein_coding
	0.01	1.93	YWSHPRKF	8		0.5405	Canonical	RPS29P9	ENSG00000223433.1	processed_pseudogene	Y
	PF		VYTSGIYNV	9		0.1356	Canonical	TNS3	ENSG00000136205.17	protein_coding
	0.05	1.24	VYGKTSHL	8		0.648	Canonical	SP1	ENSG00000185591.10	protein_coding	Y
	PF		YYINKISSTL	10		0.1023	Canonical	KRTCAP2	ENSG00000163463.11	protein_coding
	PF		YYINKISSTL	10		0.1023	Canonical	AL713999.1	ENSG00000273088.2	protein_coding
	PF		KYNMVSYLL	9		0.0323	Canonical	GPAT3	ENSG00000138678.11	protein_coding
	0.05	1.24	VYGKTSHL	8		0.648	Canonical	SP4	ENSG00000105866.15	protein_coding	Y
	0.05	1.42	EYLERVQAL	9		0.1444	Canonical	CAPN7	ENSG00000131375.10	protein_coding	Y
	PF		LYTDTICEI	9		0.4238	Canonical	ITGB4	ENSG00000132470.14	protein_coding
	0.05	1.24	VYGKTSHL	8		0.648	Canonical	SP3	ENSG00000172845.15	protein_coding	Y
	0.05	1.24	VYGKTSHL	8		0.648	Canonical	SP8	ENSG00000164651.16	protein_coding	Y
	0.05	1.24	VYGKTSHL	8		0.648	Canonical	SP9	ENSG00000217236.2	protein_coding	Y
	0.05	1.24	VYGKTSHL	8		0.648	Canonical	SP5	ENSG00000204335.3	protein_coding	Y
	0.01	2.12	YIKHPVSL	8		1.0539	Canonical	PSMD8	ENSG00000099341.11	protein_coding	Y
	0.01	1.99	YISEHEHF	8		0.4218	Canonical	CLPTM1	ENSG00000104853.16	protein_coding	Y
	0.01	1.69	YGEIFEKF	8		0.2676	Canonical	NDUFC2	ENSG00000151366.13	protein_coding	Y
	PF		VYSVPHFF	8		0.0321	Canonical	KIAA0391	ENSG00000100890.15	protein_coding
	PF		VYSVPHFF	8		0.0321	Canonical	AL121594.1	ENSG00000258790.1	protein_coding
	0.05	0.97	SYGSGRRF	8		0.6856	Canonical	HNRNPA1	ENSG00000135486.17	protein_coding	Y
	0.05	0.97	SYGSGRRF	8		0.6856	Canonical	HNRNPA1P48	ENSG00000224578.5	protein_coding	Y
	0.05	0.97	SYGSGRRF	8		0.6856	Canonical	HNRNPA1L2	ENSG00000139675.12	protein_coding	Y
	PF		NYGPMKGGSF	10		0.403	Canonical	HNRNPA3	ENSG00000170144.20	protein_coding
	PF		NYGPMKGGSF	10		0.403	Canonical	HNRNPA3P6	ENSG00000213300.5	processed_pseudogene
	PF		NYGPMKGGSF	10		0.403	Canonical	HNRNPA3P5	ENSG00000236565.3	processed_pseudogene
	PF		NYGPMKGGSF	10		0.403	Canonical	HNRNPA3P2	ENSG00000227688.2	unprocessed_pseudogene
	PF		NYGPMKGGSF	10		0.403	Canonical	HNRNPA3P3	ENSG00000214653.4	processed_pseudogene
	0.01	1.63	RYSNAQILQF	10		0.0295	Canonical	MTMR11	ENSG00000014914.21	protein_coding	Y
	0.05	0.97	SYGSGRRF	8		0.6856	Canonical	HNRNPA1P60	ENSG00000233497.4	processed_pseudogene	Y
	0.05	0.97	SYGSGRRF	8		0.6856	Canonical	HNRNPA1P4	ENSG00000206228.4	processed_pseudogene	Y
	PF		KYRARFFHL	9		0.1379	Canonical	NOC4L	ENSG00000184967.7	protein_coding
	PF		RYRDRLQYF	9		0.0219	Canonical	IQGAP1	ENSG00000140575.13	protein_coding
	PF		TYGCTWEF	8		0.4954	Canonical	ABHD2	ENSG00000140526.18	protein_coding
	0.05	0.97	SYGSGRRF	8		0.6856	Canonical	HNRNPA1P3	ENSG00000226188.2	processed_pseudogene	Y
	0.01	1.64	VYPTFGPQDSF	11		0.0193	Canonical	C16orf89	ENSG00000153446.15	protein_coding	Y
	PF		FLDPDRHFL	9		1.6015	Canonical	FAM83H	ENSG00000180921.7	protein_coding
	0.05	0.97	SYGSGRRF	8		0.6856	Canonical	HNRNPA1P41	ENSG00000220937.3	processed_pseudogene	Y
	0.05	0.97	SYGSGRRF	8		0.6856	Canonical	HNRNPA1P38	ENSG00000253605.1	processed_pseudogene	Y
	PF		KYLDIHERM	9		0.0232	Canonical	TIMM10	ENSG00000134809.9	protein_coding
	0.05	0.97	SYGSGRRF	8		0.6856	Canonical	HNRNPA1P11	ENSG00000264315.1	processed_pseudogene	Y
	0.05	0.97	SYGSGRRF	8		0.6856	Canonical	HNRNPA1P56	ENSG00000248640.1	processed_pseudogene	Y
	PF		FFKPHWDEKF	10		0.2738	Canonical	SERPINH1	ENSG00000149257.14	protein_coding
	0.05	0.97	SYGSGRRF	8		0.6856	Canonical	HNRNPA1P1	ENSG00000218347.2	processed_pseudogene	Y
	0.01	1.42	IYYTGKYQSL	10		0.1221	Canonical	MYCBP2	ENSG00000005810.18	protein_coding	Y
	PF	1.14	SYSGVSLF	8		0.1697	Canonical	DCN	ENSG00000011465.17	protein_coding
	0.01	2.53	PYRLIFEKF	9		0.1039	Canonical	PRKDC	ENSG00000253729.7	protein_coding	Y
	PF		EYISTVKTL	9		0.0667	Canonical	ING5	ENSG00000168395.15	protein_coding
	PF		EYGIFNQKI	9		0.2799	Canonical	PYGL	ENSG00000100504.17	protein_coding
	PF		SLPHRRPHFF	10		0.8539	Canonical	CLU	ENSG00000120885.21	protein_coding
	PF		HYLDQLNHI	9		0.0197	Canonical	MAPK3	ENSG00000102882.12	protein_coding
	PF		IYASVRTLL	9		0.0262	Canonical	SH3BP4	ENSG00000130147.16	protein_coding
	PF		HYLDQLNHI	9		0.0197	Canonical	MAPK1	ENSG00000100030.14	protein_coding
	PF		IFHEVPLKF	9		0.0055	Canonical	ICE2	ENSG00000128915.12	protein_coding
	PF		IFHEVPLKF	9		0.0055	Canonical	ICE2P2	ENSG00000242705.1	processed_pseudogene
	PF		KYLEDRGEVTF	11		0.0288	Canonical	GRK2	ENSG00000173020.11	protein_coding
	PF		VYSHVIQKLQL	11		0.1958	Canonical	SDS	ENSG00000135094.11	protein_coding
	0.01	1.84	SYLENVDHF	9		0.0027	Canonical	CAMTA2	ENSG00000108509.21	protein_coding	Y
	0.01	2.57	KYVKVFHKF	9		0.0006	Canonical	ZNF92	ENSG00000146757.13	protein_coding	Y
	0.01	1.18	RYSDSVGRVSF	11		0.0273	Canonical	CAPN13	ENSG00000162949.16	protein_coding	Y
	PF		IYQEIILANHF	11		0.0161	Canonical	RINT1	ENSG00000135249.8	protein_coding
	PF		TYLIQHQKI	9		0.0207	Canonical	ZNF189	ENSG00000136870.10	protein_coding
	0.01	2.57	KYVKVFHKF	9		0.0006	Canonical	ZNF431	ENSG00000196705.8	protein_coding	Y
	0.01	2.62	SYLEKQVVTF	10		0.0069	Canonical	TTC27	ENSG00000018699.13	protein_coding	Y
	0.01	1.89	VYANGQHLFD	10		0.2544	Canonical	LGALS4	ENSG00000171747.9	protein_coding	Y
	PF		VYQKLSIQL	9		0.0098	Canonical	SENP6	ENSG00000112701.18	protein_coding
	0.05	1.58	IYKDNRNLF	9		0.0212	Canonical	CACNA2D2	ENSG00000007402.11	protein_coding	Y
	0.01	2.16	RYIDNSICGF	10		0.0383	Canonical	AC092724.1	ENSG00000140876.11	protein_coding	Y
	PF		IYVSLAHVL	9		0.0256	Canonical	ANO7	ENSG00000146205.13	protein_coding
	PF		KYYDKKYQVF	10		0.0121	Canonical	FGGY	ENSG00000172456.17	protein_coding
	PF		VYNQPGHQF	9		0.004	Canonical	FER1L6	ENSG00000214814.7	protein_coding
	0.01	2.57	KYVKVFHKF	9		0.0006	Canonical	ZNF98	ENSG00000197360.9	protein_coding	Y
	PF		VYMPDHSYVTI	11		0.0704	Canonical	RAPGEFL1	ENSG00000108352.12	protein_coding
	0.01	2.57	KYVKVFHKF	9		0.0006	Canonical	ZNF492	ENSG00000229676.3	protein_coding	Y
	PF		LYSNLQHLKW	10		0.2359	Canonical	EHF	ENSG00000135373.12	protein_coding
	PF		PYHRRPVLF	9		0.0467	Canonical	AOC3	ENSG00000131471.7	protein_coding
	0.01	2.57	KYVKVFHKF	9		0.0006	Canonical	ZNF680	ENSG00000173041.12	protein_coding	Y
	PF		VYKDHQTITI	10		0.1583	Canonical	MCM3	ENSG00000112118.19	protein_coding
	0.01	2.57	KYVKVFHKF	9		0.0006	Canonical	ZNF723	ENSG00000268696.2	protein_coding	Y
	0.01	2.57	KYVKVFHKF	9		0.0006	Canonical	ZNF730	ENSG00000183850.14	protein_coding	Y
	0.01	2.57	KYVKVFHKF	9		0.0006	Canonical	ZNF849P	ENSG00000198153.8	unprocessed_pseudogene	Y
	0.01	2.57	KYVKVFHKF	9		0.0006	Canonical	AL353795.1	ENSG00000215198.3	processed_pseudogene	Y
	0.01	2.57	KYVKVFHKF	9		0.0006	Canonical	ZNF209P	ENSG00000269138.1	unprocessed_pseudogene	Y
	0.01	1.2	VYSEKVMHMF	10		0.0084	Canonical	MYO18A	ENSG00000196535.16	protein_coding	Y
	PF		KYLKTGFLKW	10		0.0946	Canonical	NAPG	ENSG00000134265.13	protein_coding
	PF		FSTVHEKF	8		1.9504	Canonical	WDR36	ENSG00000134987.11	protein_coding
	PF		VYDITRRETF	10		0.0859	Canonical	RAB2B	ENSG00000129472.15	protein_coding
	PF		KYGKVWGF	8		0.1948	Canonical	CYP3A4	ENSG00000160868.15	protein_coding
	PF		SYQKVMALW	9		0.0205	Canonical	MACF1	ENSG00000127603.26	protein_coding
	0.01	1.64	SYNDYVREF	9		0.0057	Canonical	YTHDC1	ENSG00000083896.12	protein_coding	Y
	PF		RYMSHKLKI	9		0.0521	Canonical	GBP3	ENSG00000117226.12	protein_coding
	0.01	1.52	KYFSDGSSNTF	11		0.0191	Canonical	BTBD3	ENSG00000132640.15	protein_coding	Y
	PF		KYKDKKWYQF	10		0.0541	Canonical	STXBP5L	ENSG00000145087.12	protein_coding
	PF		KYKDKKWYQF	10		0.0541	Canonical	STXBP5	ENSG00000164506.14	protein_coding
	0.01	2.78	SYLKQLPHF	9		0.0018	Canonical	SNRNP200	ENSG00000144028.15	protein_coding	Y
	0.01	2.78	SYLKQLPHF	9		0.0018	Canonical	AC132812.1	ENSG00000265298.1	unprocessed_pseudogene	Y
	PF		RYLEAALRL	9		0.0182	Canonical	P3H4	ENSG00000141696.13	protein_coding
	PF		QYSNNIRQLL	10		0.2938	Canonical	UBA1	ENSG00000130985.17	protein_coding
	PF		VFIDSGRHYW	10		0.1814	Canonical	MID1	ENSG00000101871.14	protein_coding
	PF		YYMEKELANF	10		0.0178	Canonical	LSR	ENSG00000105699.16	protein_coding
	PF		VFFKGFKW	8		0.6163	Canonical	NDUFB3	ENSG00000119013.9	protein_coding
	PF		HYINMPVQF	9		0.0035	Canonical	CEP192	ENSG00000101639.18	protein_coding
	PF		VWYPGKPLKV	10		0.499	Canonical	RARRES1	ENSG00000118849.10	protein_coding
	0.01	2.63	KYSLIKGNF	9		0.0652	Canonical	S100A8	ENSG00000143546.10	protein_coding	Y
	PF		KYLLHSLVF	9		0.0171	Canonical	ACOX3	ENSG00000087008.16	protein_coding
	0.01	2.01	LYLLNTTKL	9		0.0518	Canonical	MLH1	ENSG00000076242.14	protein_coding	Y
	PF		AYVKGGLSTF	10		0.044	Canonical	EXOC2	ENSG00000112685.14	protein_coding
	PF		AYKDKDISFF	10		0.1078	Canonical	ZBED5	ENSG00000236287.8	protein_coding
	PF		KYGSVTVW	8		0.3861	Canonical	PPP4C	ENSG00000149923.14	protein_coding
	PF		VYCARFVEL	9		0.0905	Canonical	THOC2	ENSG00000125676.20	protein_coding
	0.01	2.2	NYQNVVHKL	9		0.009	Canonical	ZMYM4	ENSG00000146463.11	protein_coding	Y
	0.01	2.3	EYLTKVDKL	9		0.1418	Canonical	CLTC	ENSG00000141367.11	protein_coding	Y
	PF	1.33	FYIHEVQEL	9		0.0311	Canonical	HERC4	ENSG00000148634.15	protein_coding
	PF		PYVDNSYKW	9		0.064	Canonical	LACTB	ENSG00000103642.12	protein_coding
	PF		IYQYIQSRF	9		0.006	Canonical	DYRK1A	ENSG00000157540.21	protein_coding
	PF		IYQYIQSRF	9		0.006	Canonical	DYRK1B	ENSG00000105204.14	protein_coding
	PF		SYVDKNLELF	10		0.0152	Canonical	TSTD2	ENSG00000136925.15	protein_coding
	0.05	1.94	EYSRFVNQI	9		0.1163	Canonical	KHDC4	ENSG00000132680.11	protein_coding	Y
	PF		FYSRLLQKF	9		0.0062	Canonical	ZWILCH	ENSG00000174442.12	protein_coding
	PF		TYNEPGSQVF	10		0.0411	Canonical	PBRM1	ENSG00000163939.18	protein_coding
	PF		RYLDLFTSF	9		0.0019	Canonical	KDELR2	ENSG00000136240.10	protein_coding
	PF		RYPSNLQLF	9		0.0019	Canonical	TEP1	ENSG00000129566.13	protein_coding
	0.01	1.47	VYANGQHLF	9		0.0023	Canonical	LGALS4	ENSG00000171747.9	protein_coding	Y
	0.01	2.38	SFHNIHNTF	9		0.0171	Canonical	BUB3	ENSG00000154473.18	protein_coding	Y
	0.01	2.63	IFTDLSSRF	9		0.0706	Canonical	XRCC5	ENSG00000079246.16	protein_coding	Y
	PF		RFPPYHVGQTF	11		0.0135	Canonical	YBX3	ENSG00000060138.13	protein_coding
	PF		AYGTVHYF	8		0.0799	Canonical	LMF2	ENSG00000100258.18	protein_coding
	PF		DYILNVMKF	9		0.0299	Canonical	HUWE1	ENSG00000086758.16	protein_coding
	0.05	1.61	KYAPSGFYI	9		0.0223	Canonical	WDR1	ENSG00000071127.17	protein_coding	Y
	PF		SYNSPIGL	8		1.4945	Canonical	PDLIM3	ENSG00000154553.15	protein_coding
	PF		RWPKKSAEFL	10		0.6891	Canonical	RPL17-C18orf32	ENSG00000215472.10	protein_coding
	PF		RWPKKSAEFL	10		0.6891	Canonical	RPL17	ENSG00000265681.7	protein_coding
	PF		RYVEQKAGITF	11		0.0197	Canonical	DDX50	ENSG00000107625.13	protein_coding
	0.01	1.69	YYKNIGLGF	9		0.0366	Canonical	RPS11P5	ENSG00000232888.4	processed_pseudogene	Y
	PF		NYSGAAEYLYF	11		0.1569	Canonical	EIF3E	ENSG00000104408.9	protein_coding
	PF		NYSGAAEYLYF	11		0.1569	Canonical	EIF3EP1	ENSG00000234882.1	processed_pseudogene
	PF		RYSTGLAGNLL	11		0.421	Canonical	CHTF8	ENSG00000168802.13	protein_coding
	PF		RWPKKSAEFL	10		0.6891	Canonical	AC113935.1	ENSG00000226084.5	processed_pseudogene
	0.01	1.69	YYKNIGLGF	9		0.0366	Canonical	RPS11	ENSG00000142534.7	protein_coding	Y
	PF		RWPKKSAEFL	10		0.6891	Canonical	AL049597.1	ENSG00000230721.1	processed_pseudogene
	PF		RWPKKSAEFL	10		0.6891	Canonical	BX679664.3	ENSG00000244716.3	processed_pseudogene
	PF		KYSVINEINKI	11		0.3395	Canonical	AC124319.1	ENSG00000173821.19	protein_coding
	PF		RWPKKSAEFL	10		0.6891	Canonical	AC064799.1	ENSG00000212664.5	processed_pseudogene
	0.01	2.36	VYSRTFTWL	9		0.0949	Canonical	MYO1C	ENSG00000197879.17	protein_coding	Y
	PF		YYIQNGIQSF	10		0.0084	Canonical	PRKDC	ENSG00000253729.7	protein_coding
	0.01	2.09	LYAPYSTHF	9		0.003	Canonical	GPRC5A	ENSG00000013588.8	protein_coding	Y
	0.01	3.31	KQALKYFNL	9		1.2783	Canonical	SEL1L	ENSG00000071537.14	protein_coding	Y
	PF		RYNERLDRLFI	11		1.1372	Canonical	ZSWIM3	ENSG00000132801.7	protein_coding
	PF		TYIRRYILKF	10		0.1133	Canonical	ADGRG6	ENSG00000112414.14	protein_coding
	PF		EYLRFLQTI	9		0.0283	Canonical	ITPR2	ENSG00000123104.12	protein_coding
	0.01	2.02	KYGIVLKEF	9		0.0166	Canonical	GTF2F1	ENSG00000125651.14	protein_coding	Y
	PF		IFIRTPRTLF	10		0.1597	Canonical	MYO1D	ENSG00000176658.17	protein_coding
	PF		AYIQGLKEKF	10		0.0423	Canonical	RETSAT	ENSG00000042445.14	protein_coding
	PF		KYPENDLFRKL	11		0.2149	Canonical	KDM5A	ENSG00000073614.12	protein_coding
	0.01	1.78	IFTNTVARF	9		0.0622	Canonical	AKAP11	ENSG00000023516.9	protein_coding	Y
	PF		FYNLLTRTF	9		0.018	Canonical	PIGT	ENSG00000124155.18	protein_coding
	PF	1.62	KYPVLFQRI	9		0.0122	Canonical	AKAP13	ENSG00000170776.21	protein_coding
	PF		TYNKVLHFF	9		0.0023	Canonical	SEC24D	ENSG00000150961.15	protein_coding
	0.01	2.29	KYMDIEFDF	9		0.0119	Canonical	MYO1B	ENSG00000128641.19	protein_coding	Y
	0.01	2.29	KYMDIEFDF	9		0.0119	Canonical	MYO1A	ENSG00000166866.13	protein_coding	Y
	PF		RFKNKAYLL	9		0.2723	Canonical	DICER1	ENSG00000100697.14	protein_coding
	PF		KYRDQYNWF	9		0.0585	Canonical	C1GALT1C1	ENSG00000171155.8	protein_coding
	PF		KYPHYFPVM	9		0.0556	Canonical	NLN	ENSG00000123213.23	protein_coding
	0.05	1.31	KYLSDNVHL	9		0.0555	Canonical	CDC37	ENSG00000105401.9	protein_coding	Y
	PF		KYSKRFPEL	9		0.0199	Canonical	PRPF31	ENSG00000105618.14	protein_coding
	0.01	2.76	HYIERIQKL	9		0.0096	Canonical	KANK1	ENSG00000107104.18	protein_coding	Y
	PF		AYAIIKEEL	9		0.1565	Canonical	ATAD2	ENSG00000156802.13	protein_coding
	0.01	2.51	VYTYIQSRF	9		0.0107	Canonical	DYRK4	ENSG00000010219.13	protein_coding	Y
	0.01	2.51	VYTYIQSRF	9		0.0107	Canonical	DYRK2	ENSG00000127334.10	protein_coding	Y
	PF		KYNKILNKY	9		0.2488	Canonical	DOCK2	ENSG00000134516.17	protein_coding
	0.01	2.03	DYIKFLRSI	9		0.1669	Canonical	HDAC1	ENSG00000116478.12	protein_coding	Y
	0.01	2.03	DYIKFLRSI	9		0.1669	Canonical	HDAC1P2	ENSG00000233012.2	transcribed_processed_pseudogene	Y
	PF		KFTPVASKF	9		0.0264	Canonical	ZYX	ENSG00000159840.16	protein_coding
	PF		RYINFKMANL	10		0.5136	Canonical	KCTD9	ENSG00000104756.16	protein_coding
	PF		KYPDIISRI	9		0.0062	Canonical	LIG1	ENSG00000105486.14	protein_coding
	PF		RYSRSLTIAEF	11		0.1906	Canonical	TBCB	ENSG00000105254.12	protein_coding
	PF		VYKSEFIDL	9		0.0866	Canonical	POLR1B	ENSG00000125630.15	protein_coding
	PF		SYVRSLPFF	9		0.0064	Canonical	TRAPPC1	ENSG00000170043.11	protein_coding
	PF		KYPVEWAKF	9		0.0047	Canonical	ZC2HC1A	ENSG00000104427.12	protein_coding
	0.01	1.25	IYPPKLHQF	9		0.0008	Canonical	CCNE1	ENSG00000105173.14	protein_coding	Y
	0.05	1.71	RYKDTINKI	9		0.0209	Canonical	ROCK1	ENSG00000067900.8	protein_coding	Y
	PF		KYMEGSKLHYF	11		0.0072	Canonical	PIGW	ENSG00000277161.2	protein_coding
	0.01	1.67	KYADKIYSI	9		0.0039	Canonical	FOLH1	ENSG00000086205.18	protein_coding	Y
	0.01	1.57	RYTIVQQQI	9		0.0294	Canonical	TUBGCP2	ENSG00000130640.13	protein_coding	Y
	PF		TYTLRVFEL	9		0.0761	Canonical	PTPRC	ENSG00000081237.20	protein_coding
	PF		RYISPDQLADL	11		0.2122	Canonical	ENO1	ENSG00000074800.16	protein_coding
	PF		KYTEVLKTHGL	11		0.4206	Canonical	RPL13A	ENSG00000142541.17	protein_coding
	PF		KYTEVLKTHGL	11		0.4206	Canonical	RPL13AP5	ENSG00000236552.2	processed_pseudogene
	PF		RYTALQAFKF	10		0.0977	Canonical	UBR2	ENSG00000024048.10	protein_coding
	PF		KYTEVLKTHGL	11		0.4206	Canonical	RPL13AP6	ENSG00000234118.1	processed_pseudogene
	PF		KYTEVLKTHGL	11		0.4206	Canonical	RPL13AP25	ENSG00000136149.6	processed_pseudogene
	PF		KYTEVLKTHGL	11		0.4206	Canonical	RPL13AP20	ENSG00000234498.3	processed_pseudogene
	PF		VYVQILQKL	9		0.0055	Canonical	ORC1	ENSG00000085840.13	protein_coding
	PF		KYTEVLKTHGL	11		0.4206	Canonical	AC024940.3	ENSG00000243517.1	processed_pseudogene
	PF		VYKTGVTHYF	10		0.0098	Canonical	SDR42E1	ENSG00000184860.10	protein_coding
	PF		KYTEVLKTHGL	11		0.4206	Canonical	AC098935.1	ENSG00000226945.1	processed_pseudogene
	PF		KYTEVLKTHGL	11		0.4206	Canonical	RHEX	ENSG00000263961.8	protein_coding
	PF		KYTEVLKTHGL	11		0.4206	Canonical	AC074250.1	ENSG00000249970.1	processed_pseudogene
	0.01	2	YYLNDLDRI	9		0.1645	Canonical	GNAI1	ENSG00000127955.17	protein_coding	Y
	0.01	2	YYLNDLDRI	9		0.1645	Canonical	GNAI3	ENSG00000065135.11	protein_coding	Y
	0.01	2	YYLNDLDRI	9		0.1645	Canonical	GNAT3	ENSG00000214415.3	protein_coding	Y
	0.01	1.46	IYNKIKQII	9		0.0459	Canonical	DLG3	ENSG00000082458.12	protein_coding	Y
	PF		LYKELGEYF	9		0.0158	Canonical	DIAPH1	ENSG00000131504.17	protein_coding
	0.01	2.45	RYKFHNSRW	9		0.2357	Canonical	TBX3	ENSG00000135111.16	protein_coding	Y
	0.01	2.45	RYKFHNSRW	9		0.2357	Canonical	TBX2	ENSG00000121068.14	protein_coding	Y
	0.01	3.51	KYLYVDKNF	9		0.0366	Canonical	MYH9	ENSG00000100345.21	protein_coding	Y
	PF		YHPNVDKL	8		1.8515	Canonical	UBE2N	ENSG00000177889.10	protein_coding
	0.01	2.23	AYIERMNYI	9		0.055	Canonical	YES1	ENSG00000176105.14	protein_coding	Y
	PF		YHPNVDKL	8		1.8515	Canonical	AC024451.3	ENSG00000254065.1	processed_pseudogene
	PF		YHPNVDKL	8		1.8515	Canonical	UBE2NL	ENSG00000276380.2	polymorphic_pseudogene
	PF		YHPNVDKL	8		1.8515	Canonical	UBE2NP1	ENSG00000256385.1	processed_pseudogene
	0.01	2.23	AYIERMNYI	9		0.055	Canonical	FYN	ENSG00000010810.17	protein_coding	Y
	0.01	1.92	KYLTVKDYL	9		0.1202	Canonical	ATAD2	ENSG00000156802.13	protein_coding	Y
	0.01	1.73	IYNQVKQII	9		0.0484	Canonical	DLG1	ENSG00000075711.21	protein_coding	Y
	PF		HFLDRHLVF	9		0.069	Canonical	EIF3E	ENSG00000104408.9	protein_coding
	0.01	2.21	VYTDFAFRI	9		0.0415	Canonical	NOL9	ENSG00000162408.11	protein_coding	Y
	0.01	1.46	AYLVHIEHL	9		0.0329	Canonical	MCC	ENSG00000171444.18	protein_coding	Y
	PF		LYPQFMFHL	9		0.0458	Canonical	SEC23B	ENSG00000101310.17	protein_coding
	PF		LYPQFMFHL	9		0.0458	Canonical	SEC23A	ENSG00000100934.15	protein_coding
	PF		VYLDEPIKI	9		0.0114	Canonical	SLMAP	ENSG00000163681.15	protein_coding
	0.01	2.25	VYNPVRAEW	9		0.0158	Canonical	KBTBD6	ENSG00000165572.7	protein_coding	Y
	PF		KYNLVTHIL	9		0.0192	Canonical	ZNF366	ENSG00000178175.12	protein_coding
	PF		KYNLVTHIL	9		0.0192	Canonical	ZNF710	ENSG00000140548.10	protein_coding
	PF		PYLISGSKF	9		0.0976	Canonical	TTLL4	ENSG00000135912.11	protein_coding
	0.05	1.58	EYMEHTYLI	9		0.0164	Canonical	OSBPL1A	ENSG00000141447.18	protein_coding	Y
	0.01	1.66	YYEYNHDLF	9		0.0964	Canonical	SAV1	ENSG00000151748.14	protein_coding	Y
	0.01	1.66	YYEYNHDLF	9		0.0964	Canonical	AC093890.1	ENSG00000249741.2	processed_pseudogene	Y
	PF		TYIQKIFRM	9		0.022	Canonical	ACOX3	ENSG00000087008.16	protein_coding
	0.01	1.9	NYQKRFQNL	9		0.031	Canonical	OGFR	ENSG00000060491.16	protein_coding	Y
	0.01	1.94	VYAPFIEKL	9		0.0028	Canonical	LY9	ENSG00000122224.18	protein_coding	Y
	PF		RYSVASFKF	9		0.0066	Canonical	MYORG	ENSG00000164976.9	protein_coding
	0.01	2.42	VYSLVTRTW	9		0.0216	Canonical	TRPM4	ENSG00000130529.16	protein_coding	Y
	PF		KYMGIPQIRQL	11		0.0908	Canonical	VPS53	ENSG00000141252.20	protein_coding
	PF		KYADAVKNF	9		0.0046	Canonical	RASA3	ENSG00000185989.11	protein_coding
	PF		SYNRTFMKL	9		0.0182	Canonical	MAN1A1	ENSG00000111885.7	protein_coding
	0.01	1.87	VYPRPIITW	9		0.0029	Canonical	HHLA2	ENSG00000114455.13	protein_coding	Y
	0.01	1.37	YYTDIMHTL	9		0.0057	Canonical	PLXNB2	ENSG00000196576.15	protein_coding	Y
	0.05	1.34	AYLSGMLRF	9		0.0091	Canonical	SRP68	ENSG00000167881.15	protein_coding	Y
	0.01	2.06	RYSVFFQSL	9		0.0184	Canonical	PSMD6	ENSG00000163636.10	protein_coding	Y
	PF		IYQREWQRF	9		0.0031	Canonical	ACTR8	ENSG00000113812.14	protein_coding
	PF		MYSFVNDKF	9		0.0205	Canonical	ZC3H12C	ENSG00000149289.11	protein_coding
	PF		MYSFVNDKF	9		0.0205	Canonical	ZC3H12B	ENSG00000102053.12	protein_coding
	PF		MYSFVNDKF	9		0.0205	Canonical	ZC3H12A	ENSG00000163874.11	protein_coding
	PF		KYIINVKQF	9		0.0091	Canonical	PSMC2	ENSG00000161057.12	protein_coding
	PF		IYNPSMGVSVL	11		0.2874	Canonical	NECTIN1	ENSG00000110400.11	protein_coding
	0.01	2.19	SYANYFIRL	9		0.02	Canonical	SH3BP1	ENSG00000100092.23	protein_coding	Y
	0.01	2.19	SYANYFIRL	9		0.02	Canonical	Z83844.3	ENSG00000285304.1	protein_coding	Y
	PF		KHTENVAKF	9		0.4762	Canonical	CTCF	ENSG00000102974.16	protein_coding
	0.01	2.12	PYVNNVPHL	9		0.0557	Canonical	MARS	ENSG00000166986.15	protein_coding	Y
	PF		VYGNERFIQYL	11		0.3629	Canonical	PICALM	ENSG00000073921.18	protein_coding
	PF		QYLEEAPKF	9		0.0055	Canonical	TRAPPC6A	ENSG00000007255.10	protein_coding
	PF		YFINRSWEW	9		0.0704	Canonical	FAR2	ENSG00000064763.11	protein_coding
	0.01	2.43	HYHKKFWKL	9		0.0139	Canonical	GALNT3	ENSG00000115339.13	protein_coding	Y
	0.01	1.41	VYPLMKEYF	9		0.0105	Canonical	TFIP11	ENSG00000100109.17	protein_coding	Y
	0.01	2.48	AYLDKSPQF	9		0.004	Canonical	DHX29	ENSG00000067248.10	protein_coding	Y
	0.05	1.5	RYLEKFYGL	9		0.0197	Canonical	MMP12	ENSG00000262406.2	protein_coding	Y
	PF		RYMQWRETM	9		0.0551	Canonical	ITPKC	ENSG00000086544.3	protein_coding
	0.05	1.21	SYSGTFHSL	9		0.0095	Canonical	NBPF1	ENSG00000219481.10	protein_coding	Y
	0.01	1.98	NYARGHYTI	9		0.0457	Canonical	TUBA1C	ENSG00000167553.15	protein_coding	Y
	0.01	1.56	QYQEAFQKL	9		0.008	Canonical	GEMIN5	ENSG00000082516.9	protein_coding	Y
	PF		AYLDSTERF	9		0.0042	Canonical	CUL5	ENSG00000166266.14	protein_coding
	0.01	1.98	NYARGHYTI	9		0.0457	Canonical	TUBA1A	ENSG00000167552.14	protein_coding	Y
	0.01	1.98	NYARGHYTI	9		0.0457	Canonical	TUBA1B	ENSG00000123416.15	protein_coding	Y
	PF		SYGPVAYHL	9		0.0046	Canonical	SLC52A3	ENSG00000101276.17	protein_coding
	0.01	1.98	NYARGHYTI	9		0.0457	Canonical	TUBA3C	ENSG00000198033.12	protein_coding	Y
	0.01	1.98	NYARGHYTI	9		0.0457	Canonical	TUBA3D	ENSG00000075886.11	protein_coding	Y
	PF		EYLRQIFRL	9		0.04	Canonical	SMPD4	ENSG00000136699.19	protein_coding
	PF		EYLRQIFRL	9		0.04	Canonical	AC073869.1	ENSG00000152117.17	transcribed_processed_pseudogene
	0.01	1.98	NYARGHYTI	9		0.0457	Canonical	TUBA3E	ENSG00000152086.9	protein_coding	Y
	0.01	1.98	NYARGHYTI	9		0.0457	Canonical	TUBA4A	ENSG00000127824.14	protein_coding	Y
	0.01	2.29	AYVEKVEKL	9		0.031	Canonical	AMOTL1	ENSG00000166025.18	protein_coding	Y
	0.01	1.98	NYARGHYTI	9		0.0457	Canonical	TUBAP2	ENSG00000214391.3	processed_pseudogene	Y
	0.01	1.98	NYARGHYTI	9		0.0457	Canonical	AC239600.2	ENSG00000274374.1	processed_pseudogene	Y
	PF		IYLDLPQNF	9		0.0009	Canonical	RNF14	ENSG00000013561.18	protein_coding
	0.01	2.29	IFSKFTSKF	9		0.0192	Canonical	MARK2	ENSG00000072518.20	protein_coding	Y
	0.01	1.5	IYYIDMQKF	9		0.0054	Canonical	KCTD3	ENSG00000136636.13	protein_coding	Y
	0.01	2.81	KYQEVTNNL	9		0.0085	Canonical	CAPRIN1	ENSG00000135387.21	protein_coding	Y
	PF		RYSAGWDAKFF	11		0.2461	Canonical	HSD17B6	ENSG00000025423.11	protein_coding
	0.05	1.67	KYPLLISRI	9		0.0189	Canonical	ARHGEF2	ENSG00000116584.18	protein_coding	Y
	PF		SYINPDHLKYF	11		0.0161	Canonical	ITCH	ENSG00000078747.15	protein_coding
	0.05	1.77	RYAAQLPAL	9		0.1178	Canonical	PELP1	ENSG00000141456.15	protein_coding	Y
	0.05	1.19	VYQEMPAQL	9		0.0092	Canonical	AC011462.1	ENSG00000255730.5	protein_coding	Y
	0.05	1.19	VYQEMPAQL	9		0.0092	Canonical	BCKDHA	ENSG00000248098.12	protein_coding	Y
	0.01	1.87	NYLVLPNRI	9		0.1058	Canonical	ESYT2	ENSG00000117868.16	protein_coding	Y
	PF		TYSPAFKQF	9		0.0022	Canonical	GYG2	ENSG00000056998.20	protein_coding
	PF		QYMNTVVNF	9		0.004	Canonical	TMEM106C	ENSG00000134291.12	protein_coding
	0.01	2.85	SYLLRPMVF	9		0.0088	Canonical	SLC28A2	ENSG00000137860.12	protein_coding	Y
	PF		EYLERAPEL	9		0.1649	Canonical	XRN1	ENSG00000114127.10	protein_coding
	0.01	1.82	TYADTLNHL	9		0.0192	Canonical	NBAS	ENSG00000151779.13	protein_coding	Y
	PF		AYAQEIQKL	9		0.0229	Canonical	NFIL3	ENSG00000165030.4	protein_coding
	PF		KYMYFTVVM	9		0.2629	Canonical	PHLDA1	ENSG00000139289.13	protein_coding
	0.01	1.96	VYVERAEVL	9		0.0773	Canonical	BRAP	ENSG00000089234.16	protein_coding	Y
	0.01	1.97	YYEEQHPEL	9		0.1039	Canonical	IL32	ENSG00000008517.16	protein_coding	Y
	0.01	2.1	RYKLYQEMF	9		0.0327	Canonical	DYNC1H1	ENSG00000197102.12	protein_coding	Y
	PF		YYDPKHVIF	9		0.003	Canonical	ABCF3	ENSG00000161204.11	protein_coding
	0.01	1.67	VYPGDPLRF	9		0.0064	Canonical	TSEN34	ENSG00000170892.12	protein_coding	Y
	PF		VYPEEHSRW	9		0.0186	Canonical	RSRP1	ENSG00000117616.18	protein_coding
	0.01	2.42	RYTLQASTF	9		0.0179	Canonical	CUL1	ENSG00000055130.17	protein_coding	Y
	PF		KYLQILTSL	9		0.0168	Canonical	TMEM104	ENSG00000109066.13	protein_coding
	PF		IYARAANMF	9		0.0087	Canonical	NAPA	ENSG00000105402.8	protein_coding
	PF		KYPSPFFVF	9		0.0014	Canonical	DHX9	ENSG00000135829.17	protein_coding
	PF		NYGKTWKI	8		0.8142	Canonical	FKTN	ENSG00000106692.14	protein_coding
	PF		PYLLISTQI	9		0.1166	Canonical	GCHFR	ENSG00000137880.6	protein_coding
	0.01	1.77	TYMKEILRF	9		0.0016	Canonical	SLC17A5	ENSG00000119899.13	protein_coding	Y
	PF		KYWTEPEEF	9		0.009	Canonical	CYP3A5	ENSG00000106258.15	protein_coding
	0.01	1.12	NYITAALKL	9		0.0825	Canonical	HERC3	ENSG00000138641.18	protein_coding	Y
	0.01	1.12	NYITAALKL	9		0.0825	Canonical	AC098582.1	ENSG00000287542.1	protein_coding	Y
	0.01	1.22	FYGTFDVHL	9		0.2108	Canonical	SPTLC1	ENSG00000090054.15	protein_coding	Y
	PF		LYPGSVYLL	9		0.0185	Canonical	ABHD16A	ENSG00000204427.12	protein_coding
	PF		LYPGSVYLL	9		0.0185	Canonical	AL662899.1	ENSG00000204422.7	protein_coding
	0.01	2.43	PYHPHPHVF	9		0.0108	Canonical	FOXN3	ENSG00000053254.15	protein_coding	Y
	0.05	2.66	RYLEGTSCI	9		0.13	Canonical	EPPK1	ENSG00000261150.2	protein_coding	Y
	PF		KYLHPPPHL	9		0.0166	Canonical	MBNL1	ENSG00000152601.17	protein_coding
	PF		KYLHPPPHL	9		0.0166	Canonical	MBNL3	ENSG00000076770.14	protein_coding
	0.01	2.78	KYSKIKHLL	9		0.0163	Canonical	SCNN1B	ENSG00000168447.11	protein_coding	Y
	PF		RYLLKFEQI	9		0.0237	Canonical	POLR2B	ENSG00000047315.16	protein_coding
	0.01	1.77	AYLKDLQKL	9		0.0224	Canonical	SHOC2	ENSG00000108061.11	protein_coding	Y
	PF		AYQHLFYLL	9		0.0172	Canonical	IQGAP1	ENSG00000140575.13	protein_coding
	PF		AYQHLFYLL	9		0.0172	Canonical	IQGAP3	ENSG00000183856.11	protein_coding
	0.01	1.84	RYAQNVAFF	9		0.0053	Canonical	ZNF32	ENSG00000169740.14	protein_coding	Y
	0.05	1.96	IYHDLEQSI	9		0.0465	Canonical	PACSIN2	ENSG00000100266.19	protein_coding	Y
	PF		FYNKRTLTF	9		0.0048	Canonical	TMEM64	ENSG00000180694.14	protein_coding
	0.01	2.69	KYLDNPNAL	9		0.0554	Canonical	KANK2	ENSG00000197256.10	protein_coding	Y
	0.05	1.77	QYSSVFKSL	9		0.0524	Canonical	HEATR5A	ENSG00000129493.15	protein_coding	Y
	PF		AYIDYLSHL	9		0.0265	Canonical	CSTF3	ENSG00000176102.13	protein_coding
	0.01	1.36	EYIPKWEQF	9		0.0031	Canonical	C3orf14	ENSG00000114405.10	protein_coding	Y
	0.01	2.08	TYHPGVPVF	9		0.0037	Canonical	CHORDC1	ENSG00000110172.12	protein_coding	Y
	0.05	1.37	TYTVKIVAI	9		0.137	Canonical	DSG2	ENSG00000046604.13	protein_coding	Y
	0.01	2.08	TYHPGVPVF	9		0.0037	Canonical	AP000919.1	ENSG00000263606.1	transcribed_processed_pseudogene	Y
	PF		FYGPQVNNI	9		0.0356	Canonical	WASL	ENSG00000106299.8	protein_coding
	0.01	2.23	HYDPTINKW	9		0.0281	Canonical	ENC1	ENSG00000171617.14	protein_coding	Y
	0.01	2.08	TYHPGVPVF	9		0.0037	Canonical	AL354872.1	ENSG00000233020.1	processed_pseudogene	Y
	PF		VYRRFRHGF	9		0.2844	Canonical	RPL37	ENSG00000145592.14	protein_coding
	PF		VYNHRFHKI	9		0.0188	Canonical	USP4	ENSG00000114316.12	protein_coding
	PF		KYLSLSNSF	9		0.0052	Canonical	TLR3	ENSG00000164342.12	protein_coding
	PF		KYARVVQKL	9		0.0052	Canonical	TBPL2	ENSG00000182521.5	protein_coding
	PF		KYARVVQKL	9		0.0052	Canonical	TBP	ENSG00000112592.14	protein_coding
	0.01	1.26	YLEKPMEI	8		1.7933	Canonical	STAT3	ENSG00000168610.14	protein_coding	Y
	0.01	1.83	AYSAKIALF	9		0.0067	Canonical	DPYD	ENSG00000188641.13	protein_coding	Y
	PF		RYQALFHDF	9		0.0058	Canonical	VCPIP1	ENSG00000175073.8	protein_coding
	0.01	1.7	FYGNVSRF	8		0.2863	Canonical	EHMT1	ENSG00000181090.21	protein_coding	Y
	PF		LYSHINQTL	9		0.0225	Canonical	FAM104B	ENSG00000182518.13	protein_coding
	PF		RFKEANNFL	9		0.4318	Canonical	RPL7	ENSG00000147604.14	protein_coding
	PF		RFKEANNFL	9		0.4318	Canonical	RPL7P9	ENSG00000137970.7	processed_pseudogene
	PF		RFKEANNFL	9		0.4318	Canonical	RPL7P23	ENSG00000244363.3	processed_pseudogene
	PF		RFKEANNFL	9		0.4318	Canonical	RPL7P1	ENSG00000214485.6	processed_pseudogene
	PF		RFKEANNFL	9		0.4318	Canonical	RPL7P32	ENSG00000231006.1	processed_pseudogene
	PF		RFKEANNFL	9		0.4318	Canonical	RPL7P7	ENSG00000224315.2	processed_pseudogene
	PF		RFKEANNFL	9		0.4318	Canonical	RPL7P58	ENSG00000216938.3	processed_pseudogene
	PF		RFKEANNFL	9		0.4318	Canonical	RPL7P20	ENSG00000254252.1	processed_pseudogene
	PF		RFKEANNFL	9		0.4318	Canonical	RPL7P45	ENSG00000225823.1	processed_pseudogene
	PF		RYPLLLQKI	9		0.0111	Canonical	ARHGEF37	ENSG00000183111.12	protein_coding
	0.01	1.91	SYIEVSHGL	9		0.0385	Canonical	SYNPO2	ENSG00000172403.11	protein_coding	Y
	0.01	1.76	SYQRAFNEF	9		0.0034	Canonical	TNFAIP2	ENSG00000185215.9	protein_coding	Y
	PF		DYAKNLAKL	9		0.1466	Canonical	AC005747.1	ENSG00000007237.18	protein_coding
	PF		FYPYGLQTF	9		0.0134	Canonical	SUN2	ENSG00000100242.15	protein_coding
	0.01	1.59	RQPSLFYHL	9		0.2213	Canonical	MAP3K5	ENSG00000197442.10	protein_coding	Y
	0.01	1.59	RQPSLFYHL	9		0.2213	Canonical	MAP3K15	ENSG00000180815.14	protein_coding	Y
	0.01	2.41	NYIEKVRFL	9		0.0467	Canonical	DES	ENSG00000175084.11	protein_coding	Y
	PF		EYISIALRI	9		0.0972	Canonical	SPAST	ENSG00000021574.12	protein_coding
	0.05	1.2	NYSYLHCEW	9		0.3624	Canonical	CHD9	ENSG00000177200.17	protein_coding	Y
	0.05	1.2	NYSYLHCEW	9		0.3624	Canonical	CHD8	ENSG00000100888.13	protein_coding	Y
	0.01	1.97	VLPKLYVKL	9		0.3169	Canonical	RPS26P15	ENSG00000223416.3	processed_pseudogene	Y
	0.01	1.97	VLPKLYVKL	9		0.3169	Canonical	AC004057.1	ENSG00000196656.7	transcribed_processed_pseudogene	Y
	0.01	1.97	VLPKLYVKL	9		0.3169	Canonical	RPS26P31	ENSG00000235459.5	processed_pseudogene	Y
	0.01	1.97	VLPKLYVKL	9		0.3169	Canonical	AC104339.1	ENSG00000233778.3	processed_pseudogene	Y
	0.01	1.97	VLPKLYVKL	9		0.3169	Canonical	RPS26P6	ENSG00000212994.5	processed_pseudogene	Y
	PF		YREKIYYF	8		0.7776	Canonical	AK9	ENSG00000155085.15	protein_coding
[truncated: 1,628 more rows]
